# Supplementary material for: Identification and Differential Expression Analysis of miRNAs in <em>Lirianthe</em> <em>delavayi</em> Reveals Lacks of miRNA Expression in Plant-Pathogen Interaction Pathway in the Cultivated Population
Source: Preprints.org preprint supplement (doi:10.20944/preprints202406.1744.v1), 2024-06-25
Supplement: Supplementary file 1 [file supplementary]

## Sheet: Target_predict_annotation
miRNA ID	Transcript ID	Gene ID	Symbol	Gene Annoation	Range	Score	GO	KEGG
PC-3p-51276_74	CSS0036989.1	CSS0036989	CSS0036989	uncharacterized protein LOC113780376 [Coffea eugenioides]	296-314	2.5	-	ko00511(Other glycan degradation)
PC-3p-51276_74	CSS0048051.1	CSS0048051	CSS0048051	Receptor-like protein kinase [Actinidia chinensis var. chinensis]	163-180	2.5	GO:0004674(protein serine/threonine kinase activity);GO:0005886(plasma membrane);GO:0007166(cell surface receptor signaling pathway)
PC-3p-51276_74	CSS0014029.1	CSS0014029	CSS0014029	Receptor-like protein kinase [Actinidia chinensis var. chinensis]	124-141	2.5	GO:0004672(protein kinase activity);GO:0004674(protein serine/threonine kinase activity);GO:0005515(protein binding);GO:0005524(ATP binding);GO:0005576(extracellular region);GO:0005886(plasma membrane);GO:0007338(single fertilization);GO:0009506(plasmodesma);GO:0009723(response to ethylene);GO:0009738(abscisic acid-activated signaling pathway);GO:0009741(response to brassinosteroid);GO:0009742(br…
PC-3p-51276_74	CSS0047266.1	CSS0047266	CSS0047266	Receptor-like protein kinase [Actinidia chinensis var. chinensis]	163-180	2.5	GO:0004672(protein kinase activity);GO:0004674(protein serine/threonine kinase activity);GO:0005515(protein binding);GO:0005524(ATP binding);GO:0005576(extracellular region);GO:0005886(plasma membrane);GO:0007338(single fertilization);GO:0009506(plasmodesma);GO:0009723(response to ethylene);GO:0009738(abscisic acid-activated signaling pathway);GO:0009741(response to brassinosteroid);GO:0009742(br…
PC-3p-51276_74	CSS0013422.1	CSS0013422	CSS0013422	NA	265-283	2	-
PC-3p-51276_74	CSS0016529.1	CSS0016529	CSS0016529	NA	255-273	2.5	-
PC-3p-51276_74	CSS0019540.1	CSS0019540	CSS0019540	gag-pol, partial [Camellia sinensis]	173-191	2.2	-	ko00600(Sphingolipid metabolism)
PC-3p-51276_74	CSS0049358.1	CSS0049358	CSS0049358	NA	88-106	2.5	-
PC-3p-51276_74	CSS0020774.1	CSS0020774	CSS0020774	Receptor-like protein kinase [Actinidia chinensis var. chinensis]	163-180	2.5	GO:0004672(protein kinase activity);GO:0004674(protein serine/threonine kinase activity);GO:0005515(protein binding);GO:0005524(ATP binding);GO:0005576(extracellular region);GO:0005886(plasma membrane);GO:0007338(single fertilization);GO:0009506(plasmodesma);GO:0009723(response to ethylene);GO:0009738(abscisic acid-activated signaling pathway);GO:0009741(response to brassinosteroid);GO:0009742(br…
PC-3p-51276_74	CSS0043733.1	CSS0043733	CSS0043733	DNA/RNA polymerases superfamily protein [Theobroma cacao]	173-191	2.5	-	ko00600(Sphingolipid metabolism)
PC-3p-51276_74	CSS0026517.1	CSS0026517	CSS0026517	40S ribosomal protein S29 [Glycine soja]	209-227	2	GO:0003735(structural constituent of ribosome);GO:0008270(zinc ion binding);GO:0022627(cytosolic small ribosomal subunit)	ko03010(Ribosome)
PC-3p-51276_74	CSS0037912.1	CSS0037912	CSS0037912	Dynamin-related protein like [Actinidia chinensis var. chinensis]	104-122	2.5	GO:0000266(mitochondrial fission);GO:0003924(GTPase activity);GO:0005515(protein binding);GO:0005525(GTP binding);GO:0005739(mitochondrion);GO:0005777(peroxisome);GO:0005829(cytosol);GO:0005886(plasma membrane);GO:0007031(peroxisome organization);GO:0007049(cell cycle);GO:0007165(signal transduction);GO:0008017(microtubule binding);GO:0009791(post-embryonic development);GO:0016021(integral compon…
PC-3p-51276_74	CSS0043388.1	CSS0043388	CSS0043388	Transposon Ty3-G Gag-Pol polyprotein [Vitis vinifera]	173-191	2.5	-	ko00600(Sphingolipid metabolism)
PC-3p-51276_74	CSS0041985.1	CSS0041985	CSS0041985	DNA/RNA polymerases superfamily protein [Theobroma cacao]	173-191	2.5	-	ko00600(Sphingolipid metabolism)
PC-3p-51276_74	CSS0019805.1	CSS0019805	CSS0019805	NA	307-325	2	-
PC-3p-51276_74	CSS0013397.1	CSS0013397	CSS0013397	Dynamin-related protein like [Actinidia chinensis var. chinensis]	404-422	2.5	GO:0000266(mitochondrial fission);GO:0003924(GTPase activity);GO:0005515(protein binding);GO:0005525(GTP binding);GO:0005739(mitochondrion);GO:0005777(peroxisome);GO:0005829(cytosol);GO:0005886(plasma membrane);GO:0007031(peroxisome organization);GO:0007049(cell cycle);GO:0007165(signal transduction);GO:0008017(microtubule binding);GO:0009791(post-embryonic development);GO:0016021(integral compon…
PC-3p-51276_74	CSS0036145.1	CSS0036145	CSS0036145	NA	110-128	2	-
PC-3p-51276_74	CSS0046653.1	CSS0046653	CSS0046653	Dynamin-related protein like [Actinidia chinensis var. chinensis]	394-412	2.5	GO:0000266(mitochondrial fission);GO:0003924(GTPase activity);GO:0005515(protein binding);GO:0005525(GTP binding);GO:0005739(mitochondrion);GO:0005777(peroxisome);GO:0005829(cytosol);GO:0005886(plasma membrane);GO:0007031(peroxisome organization);GO:0007049(cell cycle);GO:0007165(signal transduction);GO:0008017(microtubule binding);GO:0009791(post-embryonic development);GO:0016021(integral compon…
PC-3p-51276_74	CSS0011610.1	CSS0011610	CSS0011610	NA	41-59	2	-
PC-3p-51276_74	CSS0023802.1	CSS0023802	CSS0023802	CCHC-type integrase [Theobroma cacao]	173-191	2	-	ko00600(Sphingolipid metabolism)
PC-3p-51276_74	CSS0018576.1	CSS0018576	CSS0018576	NA	314-332	2.5	-
PC-3p-51276_74	CSS0018576.1	CSS0018576	CSS0018576	NA	116-134	2	-
PC-3p-51276_74	CSS0008096.1	CSS0008096	CSS0008096	Protein arginine N-methyltransferase PRMT1 [Handroanthus impetiginosus]	289-307	2	GO:0005829(cytosol);GO:0006355(regulation of transcription, DNA-templated);GO:0008469(histone-arginine N-methyltransferase activity);GO:0035242(protein-arginine omega-N asymmetric methyltransferase activity)
PC-3p-51276_74	CSS0013259.1	CSS0013259	CSS0013259	40S ribosomal protein S29 [Glycine soja]	209-227	2.2	GO:0003735(structural constituent of ribosome);GO:0008270(zinc ion binding);GO:0022627(cytosolic small ribosomal subunit)	ko03010(Ribosome)
aly-miR164a-3p_1ss6AG	CSS0025807.1	CSS0025807	CSS0025807	Receptor-like protein kinase [Actinidia chinensis var. chinensis]	3077-3097	2.5	GO:0004674(protein serine/threonine kinase activity);GO:0005524(ATP binding);GO:0005886(plasma membrane);GO:0006468(protein phosphorylation);GO:0007169(transmembrane receptor protein tyrosine kinase signaling pathway);GO:0016021(integral component of membrane);GO:0016301(kinase activity);GO:0016310(phosphorylation)
ath-MIR168a-p3_1ss14CG	CSS0040311.1	CSS0040311	CSS0040311	U4/U6 small nuclear ribonucleoprotein like [Actinidia chinensis var. chinensis]	2974-2994	2	GO:0000398(mRNA splicing, via spliceosome);GO:0046540(U4/U6 x U5 tri-snRNP complex)	ko03040(Spliceosome)
ath-MIR168a-p3_1ss14CG	CSS0050146.1	CSS0050146	CSS0050146	U4/U6 small nuclear ribonucleoprotein like [Actinidia chinensis var. chinensis]	3031-3051	2	GO:0000398(mRNA splicing, via spliceosome);GO:0046540(U4/U6 x U5 tri-snRNP complex)	ko03040(Spliceosome)
ath-MIR169g-p3_2ss7AG19GA	CSS0015390.1	CSS0015390	CSS0015390	PREDICTED: glucuronoxylan 4-O-methyltransferase 1-like [Daucus carota subsp. sativus]	254-273	2.5	GO:0000139(Golgi membrane);GO:0005576(extracellular region);GO:0005794(Golgi apparatus);GO:0008168(methyltransferase activity);GO:0016021(integral component of membrane);GO:0030775(glucuronoxylan 4-O-methyltransferase activity);GO:0032259(methylation);GO:0045491(xylan metabolic process);GO:0045492(xylan biosynthetic process)
ath-MIR169g-p3_2ss7AG19GA	CSS0006625.1	CSS0006625	CSS0006625	Pentatricopeptide repeat-containing protein [Actinidia chinensis var. chinensis]	35-53	2.5	GO:0003723(RNA binding);GO:0004519(endonuclease activity);GO:0005515(protein binding);GO:0005739(mitochondrion);GO:0006397(mRNA processing);GO:0008270(zinc ion binding);GO:0009507(chloroplast);GO:0016556(mRNA modification);GO:0031425(chloroplast RNA processing);GO:1900865(chloroplast RNA modification)
ath-MIR169g-p3_2ss7AG19GA	CSS0000374.1	CSS0000374	CSS0000374	Ferric reduction oxidase [Actinidia chinensis var. chinensis]	164-182	2.5	GO:0000293(ferric-chelate reductase activity);GO:0005739(mitochondrion);GO:0005886(plasma membrane);GO:0006811(ion transport);GO:0016020(membrane);GO:0016021(integral component of membrane);GO:0016491(oxidoreductase activity);GO:0031966(mitochondrial membrane);GO:0046872(metal ion binding);GO:0055114(oxidation-reduction process)
ath-MIR169g-p3_2ss7AG19GA	CSS0000374.1	CSS0000374	CSS0000374	Ferric reduction oxidase [Actinidia chinensis var. chinensis]	33-51	2.5	GO:0000293(ferric-chelate reductase activity);GO:0005739(mitochondrion);GO:0005886(plasma membrane);GO:0006811(ion transport);GO:0016020(membrane);GO:0016021(integral component of membrane);GO:0016491(oxidoreductase activity);GO:0031966(mitochondrial membrane);GO:0046872(metal ion binding);GO:0055114(oxidation-reduction process)
ath-MIR169g-p3_2ss7AG19GA	CSS0049082.1	CSS0049082	CSS0049082	AP2-like ethylene-responsive transcription factor BBM [Vitis vinifera]	2388-2406	1.5	GO:0003677(DNA binding);GO:0003700(DNA binding transcription factor activity);GO:0005634(nucleus);GO:0006351(transcription, DNA-templated);GO:0006355(regulation of transcription, DNA-templated);GO:0007275(multicellular organism development);GO:1905392(plant organ morphogenesis)
ath-MIR169g-p3_2ss7AG19GA	CSS0023504.1	CSS0023504	CSS0023504	PREDICTED: uncharacterized protein LOC101299947 [Fragaria vesca subsp. vesca]	104-121	2	GO:0009543(chloroplast thylakoid lumen);GO:0016021(integral component of membrane)
ath-MIR169g-p3_2ss7AG19GA	CSS0014734.1	CSS0014734	CSS0014734	PREDICTED: ferric reduction oxidase 7, chloroplastic-like [Juglans regia]	468-486	1.5	GO:0000293(ferric-chelate reductase activity);GO:0006811(ion transport);GO:0009507(chloroplast);GO:0009767(photosynthetic electron transport chain);GO:0016020(membrane);GO:0016021(integral component of membrane);GO:0016491(oxidoreductase activity);GO:0031969(chloroplast membrane);GO:0046872(metal ion binding);GO:0055114(oxidation-reduction process)
ath-MIR169g-p3_2ss7AG19GA	CSS0029077.1	CSS0029077	CSS0029077	Transcription factor like [Actinidia chinensis var. chinensis]	635-652	2	GO:0000981(RNA polymerase II transcription factor activity, sequence-specific DNA binding);GO:0001135(transcription factor activity, RNA polymerase II transcription factor recruiting);GO:0003677(DNA binding);GO:0003700(DNA binding transcription factor activity);GO:0005634(nucleus);GO:0006355(regulation of transcription, DNA-templated);GO:0006357(regulation of transcription by RNA polymerase II);G…
ath-MIR169g-p3_2ss7AG19GA	CSS0002211.1	CSS0002211	CSS0002211	Homeobox-leucine zipper protein [Actinidia chinensis var. chinensis]	79-97	2	GO:0003700(DNA binding transcription factor activity);GO:0005515(protein binding);GO:0005634(nucleus);GO:0006351(transcription, DNA-templated);GO:0006355(regulation of transcription, DNA-templated);GO:0009414(response to water deprivation);GO:0009735(response to cytokinin);GO:0009737(response to abscisic acid);GO:0009738(abscisic acid-activated signaling pathway);GO:0043565(sequence-specific DNA …
ath-MIR169g-p3_2ss7AG19GA	CSS0024512.1	CSS0024512	CSS0024512	probable glycosyltransferase At5g03795 [Sesamum indicum]	179-197	2.5	-
ath-MIR169g-p3_2ss7AG19GA	CSS0027619.1	CSS0027619	CSS0027619	putative disease resistance protein RGA3 [Prunus avium]	527-545	2	GO:0005515(protein binding);GO:0005524(ATP binding);GO:0005576(extracellular region);GO:0006952(defense response);GO:0043531(ADP binding)
ath-MIR169g-p3_2ss7AG19GA	CSS0023288.1	CSS0023288	CSS0023288	Flowering time control protein like [Actinidia chinensis var. chinensis]	1486-1503	2.5	-
ath-MIR169g-p3_2ss7AG19GA	CSS0044671.1	CSS0044671	CSS0044671	Protein trichome birefringence like [Actinidia chinensis var. chinensis]	398-415	2.5	GO:0005794(Golgi apparatus);GO:0016413(O-acetyltransferase activity);GO:0071554(cell wall organization or biogenesis)
ath-MIR169g-p3_2ss7AG19GA	CSS0003090.1	CSS0003090	CSS0003090	PREDICTED: mechanosensitive ion channel protein 6-like [Nelumbo nucifera]	1392-1410	2	GO:0005886(plasma membrane);GO:0006820(anion transport);GO:0008381(mechanosensitive ion channel activity)
ath-MIR169g-p3_2ss7AG19GA	CSS0013690.1	CSS0013690	CSS0013690	WRKY transcription factor 50 [Actinidia chinensis var. chinensis]	130-148	2.5	GO:0003700(DNA binding transcription factor activity);GO:0005634(nucleus);GO:0006351(transcription, DNA-templated);GO:0006355(regulation of transcription, DNA-templated);GO:0009867(jasmonic acid mediated signaling pathway);GO:0043565(sequence-specific DNA binding);GO:0050832(defense response to fungus)	ko04016(MAPK signaling pathway - plant);ko04626(Plant-pathogen interaction)
ath-MIR169g-p3_2ss7AG19GA	CSS0004824.1	CSS0004824	CSS0004824	Vitamin K-dependent protein like [Actinidia chinensis var. chinensis]	272-291	2.5	GO:0004832(valine-tRNA ligase activity);GO:0005524(ATP binding);GO:0006438(valyl-tRNA aminoacylation);GO:0009507(chloroplast);GO:0009570(chloroplast stroma)
ath-MIR169g-p3_2ss7AG19GA	CSS0040810.1	CSS0040810	CSS0040810	RGS1-HXK1-interacting protein 1-like isoform X2 [Coffea arabica]	59-77	2.5	-
ath-MIR169g-p3_2ss7AG19GA	CSS0000753.1	CSS0000753	CSS0000753	RGS1-HXK1-interacting protein 1-like isoform X2 [Coffea arabica]	59-77	2.5	-
ath-MIR169g-p3_2ss7AG19GA	CSS0025090.1	CSS0025090	CSS0025090	Light-harvesting complex-like protein OHP2, chloroplastic [Mucuna pruriens]	45-62	2.5	GO:0003674(molecular_function);GO:0009507(chloroplast);GO:0009534(chloroplast thylakoid);GO:0009535(chloroplast thylakoid membrane);GO:0009642(response to light intensity);GO:0016021(integral component of membrane)
ath-MIR169g-p3_2ss7AG19GA	CSS0015729.1	CSS0015729	CSS0015729	amino acid transporter ANTL1-like isoform X1 [Sesamum indicum]	140-158	2.5	GO:0003333(amino acid transmembrane transport);GO:0015171(amino acid transmembrane transporter activity)
ath-MIR169g-p3_2ss7AG19GA	CSS0035435.1	CSS0035435	CSS0035435	RING-H2 finger protein [Actinidia chinensis var. chinensis]	677-696	2.5	GO:0005634(nucleus);GO:0008270(zinc ion binding);GO:0016021(integral component of membrane);GO:0016567(protein ubiquitination);GO:0043161(proteasome-mediated ubiquitin-dependent protein catabolic process);GO:0046872(metal ion binding);GO:0061630(ubiquitin protein ligase activity)
ath-MIR169g-p3_2ss7AG19GA	CSS0035435.1	CSS0035435	CSS0035435	RING-H2 finger protein [Actinidia chinensis var. chinensis]	657-675	1.5	GO:0005634(nucleus);GO:0008270(zinc ion binding);GO:0016021(integral component of membrane);GO:0016567(protein ubiquitination);GO:0043161(proteasome-mediated ubiquitin-dependent protein catabolic process);GO:0046872(metal ion binding);GO:0061630(ubiquitin protein ligase activity)
ath-MIR169g-p3_2ss7AG19GA	CSS0030284.1	CSS0030284	CSS0030284	Class E vacuolar protein-sorting machinery protein [Actinidia chinensis var. chinensis]	854-873	2	-
ath-MIR169g-p3_2ss7AG19GA	CSS0045250.1	CSS0045250	CSS0045250	Switch like [Actinidia chinensis var. chinensis]	61-80	2	GO:0004386(helicase activity);GO:0005634(nucleus);GO:0016020(membrane)
ath-MIR169g-p3_2ss7AG19GA	CSS0036741.1	CSS0036741	CSS0036741	BOI-related E3 ubiquitin-protein ligase [Actinidia chinensis var. chinensis]	188-206	2.5	GO:0005737(cytoplasm)
ath-MIR169g-p3_2ss7AG19GA	CSS0039901.1	CSS0039901	CSS0039901	LysM and putative peptidoglycan-binding domain-containing protein [Actinidia chinensis var. chinensis]	412-430	2.5	GO:0003674(molecular_function);GO:0005634(nucleus);GO:0016998(cell wall macromolecule catabolic process)
ath-MIR169g-p3_2ss7AG19GA	CSS0039901.1	CSS0039901	CSS0039901	LysM and putative peptidoglycan-binding domain-containing protein [Actinidia chinensis var. chinensis]	358-375	1	GO:0003674(molecular_function);GO:0005634(nucleus);GO:0016998(cell wall macromolecule catabolic process)
ath-MIR169g-p3_2ss7AG19GA	CSS0014903.1	CSS0014903	CSS0014903	uncharacterized protein LOC105175119 [Sesamum indicum]	1341-1360	2.5	GO:0003674(molecular_function);GO:0005739(mitochondrion);GO:0008150(biological_process)
ath-MIR169g-p3_2ss7AG19GA	CSS0044767.1	CSS0044767	CSS0044767	uncharacterized protein LOC105175119 [Sesamum indicum]	1555-1574	2.5	GO:0003674(molecular_function);GO:0005739(mitochondrion);GO:0008150(biological_process)
ath-MIR169g-p3_2ss7AG19GA	CSS0014335.1	CSS0014335	CSS0014335	PREDICTED: phosphoglucomutase, cytoplasmic [Daucus carota subsp. sativus]	161-179	2.5	GO:0004614(phosphoglucomutase activity);GO:0005829(cytosol);GO:0005978(glycogen biosynthetic process);GO:0006006(glucose metabolic process);GO:0009570(chloroplast stroma);GO:0009590(detection of gravity);GO:0010319(stromule);GO:0019252(starch biosynthetic process);GO:0019388(galactose catabolic process)	ko00010(Glycolysis / Gluconeogenesis);ko00030(Pentose phosphate pathway);ko00052(Galactose metabolism);ko00500(Starch and sucrose metabolism);ko00520(Amino sugar and nucleotide sugar metabolism);ko00230(Purine metabolism)
ath-MIR169g-p3_2ss7AG19GA	CSS0031698.1	CSS0031698	CSS0031698	Exocyst complex component EXO70A1 like [Actinidia chinensis var. chinensis]	1854-1871	2.5	GO:0000145(exocyst);GO:0005634(nucleus);GO:0006887(exocytosis);GO:0006904(vesicle docking involved in exocytosis)
ath-MIR169g-p3_2ss7AG19GA	CSS0020769.1	CSS0020769	CSS0020769	disease resistance protein At4g27190-like isoform X1 [Durio zibethinus]	2230-2249	2	GO:0005524(ATP binding);GO:0005739(mitochondrion);GO:0006952(defense response);GO:0043531(ADP binding)	ko04626(Plant-pathogen interaction)
ath-MIR169g-p3_2ss7AG19GA	CSS0002854.1	CSS0002854	CSS0002854	Methionine--tRNA ligase [Actinidia chinensis var. chinensis]	79-97	2	GO:0004825(methionine-tRNA ligase activity);GO:0005829(cytosol);GO:0006431(methionyl-tRNA aminoacylation)	ko00450(Selenocompound metabolism);ko00970(Aminoacyl-tRNA biosynthesis)
ath-MIR169g-p3_2ss7AG19GA	CSS0045295.1	CSS0045295	CSS0045295	E3 ubiquitin-protein like [Actinidia chinensis var. chinensis]	138-156	2.5	GO:0043161(proteasome-mediated ubiquitin-dependent protein catabolic process);GO:0061630(ubiquitin protein ligase activity)
ath-MIR169g-p3_2ss7AG19GA	CSS0039012.1	CSS0039012	CSS0039012	uncharacterized protein LOC113764470 isoform X2 [Coffea eugenioides]	59-77	2	GO:0070475(rRNA base methylation);GO:0071424(rRNA (cytosine-N4-)-methyltransferase activity)
ath-MIR169g-p3_2ss7AG19GA	CSS0002569.1	CSS0002569	CSS0002569	hypothetical protein CEY00_Acc27753 [Actinidia chinensis var. chinensis]	875-892	2.5	GO:0003674(molecular_function);GO:0005794(Golgi apparatus);GO:0008150(biological_process)
ath-MIR169g-p3_2ss7AG19GA	CSS0030779.1	CSS0030779	CSS0030779	Receptor-like protein kinase BRI1-like [Actinidia chinensis var. chinensis]	20-38	2.5	GO:0004672(protein kinase activity);GO:0004674(protein serine/threonine kinase activity);GO:0004714(transmembrane receptor protein tyrosine kinase activity);GO:0005496(steroid binding);GO:0005524(ATP binding);GO:0005886(plasma membrane);GO:0016021(integral component of membrane)	ko04075(Plant hormone signal transduction)
ath-MIR169g-p3_2ss7AG19GA	CSS0023407.1	CSS0023407	CSS0023407	Pentatricopeptide repeat-containing protein [Actinidia chinensis var. chinensis]	66-85	2	GO:0003723(RNA binding);GO:0008150(biological_process);GO:0009507(chloroplast)
ath-MIR169g-p3_2ss7AG19GA	CSS0013787.1	CSS0013787	CSS0013787	Magnesium transporter like [Actinidia chinensis var. chinensis]	228-245	2	GO:0005886(plasma membrane);GO:0008150(biological_process);GO:0015095(magnesium ion transmembrane transporter activity);GO:0016021(integral component of membrane)
ath-MIR169g-p3_2ss7AG19GA	CSS0046985.1	CSS0046985	CSS0046985	PREDICTED: transcription factor RAX1 [Vitis vinifera]	51-68	2	GO:0000981(RNA polymerase II transcription factor activity, sequence-specific DNA binding);GO:0001135(transcription factor activity, RNA polymerase II transcription factor recruiting);GO:0003677(DNA binding);GO:0003700(DNA binding transcription factor activity);GO:0005515(protein binding);GO:0005634(nucleus);GO:0006351(transcription, DNA-templated);GO:0006355(regulation of transcription, DNA-temp…
ath-MIR169g-p3_2ss7AG19GA	CSS0018315.1	CSS0018315	CSS0018315	PREDICTED: transcription factor RAX1 [Vitis vinifera]	51-68	2	GO:0000981(RNA polymerase II transcription factor activity, sequence-specific DNA binding);GO:0001135(transcription factor activity, RNA polymerase II transcription factor recruiting);GO:0003677(DNA binding);GO:0003700(DNA binding transcription factor activity);GO:0005515(protein binding);GO:0005634(nucleus);GO:0006351(transcription, DNA-templated);GO:0006355(regulation of transcription, DNA-temp…
ath-MIR169g-p3_2ss7AG19GA	CSS0032266.1	CSS0032266	CSS0032266	Monothiol glutaredoxin-S14 like [Actinidia chinensis var. chinensis]	47-65	2.5	GO:0006812(cation transport);GO:0009055(electron transfer activity);GO:0009507(chloroplast);GO:0009570(chloroplast stroma);GO:0009941(chloroplast envelope);GO:0015035(protein disulfide oxidoreductase activity);GO:0015038(glutathione disulfide oxidoreductase activity);GO:0015297(antiporter activity);GO:0045454(cell redox homeostasis);GO:0046872(metal ion binding);GO:0051537(2 iron, 2 sulfur cluste…
ath-MIR169g-p3_2ss7AG19GA	CSS0027211.1	CSS0027211	CSS0027211	Pentatricopeptide repeat-containing protein [Actinidia chinensis var. chinensis]	142-161	2	GO:0003723(RNA binding);GO:0008150(biological_process);GO:0009507(chloroplast)
ath-MIR169g-p3_2ss7AG19GA	CSS0022994.1	CSS0022994	CSS0022994	Transcription factor bHLH51 like [Actinidia chinensis var. chinensis]	151-169	1.5	GO:0005634(nucleus)
ath-MIR169g-p3_2ss7AG19GA	CSS0042731.3	CSS0042731	CSS0042731	Nudix hydrolase [Actinidia chinensis var. chinensis]	446-465	2.5	GO:0000210(NAD+ diphosphatase activity);GO:0005829(cytosol);GO:0006979(response to oxidative stress);GO:0016787(hydrolase activity);GO:0046872(metal ion binding);GO:0047631(ADP-ribose diphosphatase activity);GO:0051287(NAD binding)
ath-MIR169g-p3_2ss7AG19GA	CSS0018895.1	CSS0018895	CSS0018895	Pectate lyase [Actinidia chinensis var. chinensis]	177-194	2	GO:0005576(extracellular region);GO:0016829(lyase activity);GO:0030570(pectate lyase activity);GO:0045490(pectin catabolic process);GO:0046872(metal ion binding)	ko00040(Pentose and glucuronate interconversions)
ath-MIR169g-p3_2ss7AG19GA	CSS0040122.1	CSS0040122	CSS0040122	Serine/threonine-protein kinase [Actinidia chinensis var. chinensis]	2257-2275	2	GO:0004674(protein serine/threonine kinase activity);GO:0005829(cytosol);GO:0006468(protein phosphorylation);GO:0035556(intracellular signal transduction)
ath-MIR169g-p3_2ss7AG19GA	CSS0008692.1	CSS0008692	CSS0008692	NA	417-434	2.5	-
ath-MIR169g-p3_2ss7AG19GA	CSS0008661.1	CSS0008661	CSS0008661	Plexin-D1 like [Actinidia chinensis var. chinensis]	343-361	2	GO:0003674(molecular_function);GO:0005739(mitochondrion);GO:0008150(biological_process)
ath-MIR169g-p3_2ss7AG19GA	CSS0031176.1	CSS0031176	CSS0031176	sucrose non-fermenting-1-related protein kinase 2.7 [Camellia sinensis]	83-100	2.5	GO:0004674(protein serine/threonine kinase activity);GO:0005634(nucleus);GO:0005737(cytoplasm);GO:0006468(protein phosphorylation);GO:0035556(intracellular signal transduction)	ko04016(MAPK signaling pathway - plant);ko04075(Plant hormone signal transduction)
ath-MIR169g-p3_2ss7AG19GA	CSS0035500.1	CSS0035500	CSS0035500	Kinase-like protein [Actinidia chinensis var. chinensis]	57-75	2.5	GO:0004672(protein kinase activity);GO:0005524(ATP binding);GO:0005886(plasma membrane);GO:0006468(protein phosphorylation);GO:0016021(integral component of membrane);GO:0016301(kinase activity);GO:0016310(phosphorylation)
ath-MIR169g-p3_2ss7AG19GA	CSS0021204.1	CSS0021204	CSS0021204	Dipeptidyl aminopeptidase [Actinidia chinensis var. chinensis]	17-35	2.5	GO:0005576(extracellular region);GO:0005829(cytosol);GO:0009507(chloroplast)
ath-MIR169g-p3_2ss7AG19GA	CSS0047598.1	CSS0047598	CSS0047598	Kinase-like protein [Actinidia chinensis var. chinensis]	407-425	2.5	GO:0004672(protein kinase activity);GO:0005524(ATP binding);GO:0005886(plasma membrane);GO:0006468(protein phosphorylation);GO:0016021(integral component of membrane);GO:0016301(kinase activity);GO:0016310(phosphorylation)
ath-MIR169g-p3_2ss7AG19GA	CSS0005679.1	CSS0005679	CSS0005679	uncharacterized protein LOC18032247 [Citrus clementina]	216-234	2.5	GO:0009507(chloroplast);GO:0009941(chloroplast envelope);GO:0016021(integral component of membrane)
ath-MIR169g-p3_2ss7AG19GA	CSS0002070.1	CSS0002070	CSS0002070	Dipeptidyl aminopeptidase [Actinidia chinensis var. chinensis]	62-79	2.5	GO:0005576(extracellular region);GO:0005829(cytosol);GO:0009507(chloroplast)
ath-MIR169g-p3_2ss7AG19GA	CSS0030584.1	CSS0030584	CSS0030584	Transcription factor like [Actinidia chinensis var. chinensis]	287-305	1.5	GO:0000981(RNA polymerase II transcription factor activity, sequence-specific DNA binding);GO:0001135(transcription factor activity, RNA polymerase II transcription factor recruiting);GO:0003677(DNA binding);GO:0003682(chromatin binding);GO:0003700(DNA binding transcription factor activity);GO:0005515(protein binding);GO:0005634(nucleus);GO:0006351(transcription, DNA-templated);GO:0006355(regulat…
ath-MIR169g-p3_2ss7AG19GA	CSS0035911.1	CSS0035911	CSS0035911	PREDICTED: putative cysteine-rich receptor-like protein kinase 43 [Vitis vinifera]	119-137	2	GO:0004674(protein serine/threonine kinase activity);GO:0005886(plasma membrane);GO:0006468(protein phosphorylation);GO:0006952(defense response);GO:0009506(plasmodesma)
ath-MIR169g-p3_2ss7AG19GA	CSS0046987.1	CSS0046987	CSS0046987	PREDICTED: putative cysteine-rich receptor-like protein kinase 43 [Vitis vinifera]	24-42	2	GO:0004674(protein serine/threonine kinase activity);GO:0005886(plasma membrane);GO:0006468(protein phosphorylation);GO:0006952(defense response);GO:0009506(plasmodesma)
ath-MIR169g-p3_2ss7AG19GA	CSS0026931.1	CSS0026931	CSS0026931	Retrovirus-related Pol polyprotein from transposon RE1 [Vitis vinifera]	980-998	2	GO:0005739(mitochondrion)	ko04144(Endocytosis)
ath-MIR169g-p3_2ss7AG19GA	CSS0033550.1	CSS0033550	CSS0033550	Protein ALTERED XYLOGLUCAN 4-like [Actinidia chinensis var. chinensis]	2-20	2.5	GO:0005794(Golgi apparatus);GO:0016413(O-acetyltransferase activity);GO:0071554(cell wall organization or biogenesis)
ath-MIR169g-p3_2ss7AG19GA	CSS0008380.1	CSS0008380	CSS0008380	hypothetical protein MANES_18G102800 [Manihot esculenta]	255-274	2	GO:0000166(nucleotide binding);GO:0005515(protein binding);GO:0005524(ATP binding);GO:0005886(plasma membrane);GO:0006952(defense response);GO:0007165(signal transduction);GO:0009626(plant-type hypersensitive response);GO:0012505(endomembrane system);GO:0019897(extrinsic component of plasma membrane);GO:0043531(ADP binding)	ko04626(Plant-pathogen interaction)
ath-MIR169g-p3_2ss7AG19GA	CSS0044705.1	CSS0044705	CSS0044705	Disease resistance protein [Actinidia chinensis var. chinensis]	255-274	2	GO:0000166(nucleotide binding);GO:0005515(protein binding);GO:0005524(ATP binding);GO:0005886(plasma membrane);GO:0006952(defense response);GO:0007165(signal transduction);GO:0009626(plant-type hypersensitive response);GO:0012505(endomembrane system);GO:0019897(extrinsic component of plasma membrane);GO:0043531(ADP binding)	ko04626(Plant-pathogen interaction)
ath-MIR169g-p3_2ss7AG19GA	CSS0048848.1	CSS0048848	CSS0048848	Disease resistance protein [Actinidia chinensis var. chinensis]	255-274	2	GO:0004857(enzyme inhibitor activity)	ko04626(Plant-pathogen interaction)
ath-MIR169g-p3_2ss7AG19GA	CSS0021802.1	CSS0021802	CSS0021802	Disease resistance protein [Actinidia chinensis var. chinensis]	434-453	2	GO:0000166(nucleotide binding);GO:0005515(protein binding);GO:0005524(ATP binding);GO:0005886(plasma membrane);GO:0006952(defense response);GO:0007165(signal transduction);GO:0009626(plant-type hypersensitive response);GO:0012505(endomembrane system);GO:0019897(extrinsic component of plasma membrane);GO:0043531(ADP binding)	ko04626(Plant-pathogen interaction)
ath-MIR169g-p3_2ss7AG19GA	CSS0019308.1	CSS0019308	CSS0019308	PREDICTED: zinc-finger homeodomain protein 9 [Vitis vinifera]	14-32	2.5	GO:0003677(DNA binding);GO:0003700(DNA binding transcription factor activity);GO:0005515(protein binding);GO:0005634(nucleus);GO:0006351(transcription, DNA-templated);GO:0009414(response to water deprivation);GO:0042803(protein homodimerization activity);GO:0045893(positive regulation of transcription, DNA-templated);GO:0046872(metal ion binding)
ath-MIR169g-p3_2ss7AG19GA	CSS0015678.1	CSS0015678	CSS0015678	Protein phosphatase inhibitor 2 like, partial [Actinidia chinensis var. chinensis]	685-702	2	GO:0000164(protein phosphatase type 1 complex);GO:0004864(protein phosphatase inhibitor activity);GO:0043666(regulation of phosphoprotein phosphatase activity)
ath-MIR169g-p3_2ss7AG19GA	CSS0044451.1	CSS0044451	CSS0044451	Chromosome transmission fidelity protein [Actinidia chinensis var. chinensis]	376-394	2	GO:0005515(protein binding);GO:0005634(nucleus)
ath-MIR169g-p3_2ss7AG19GA	CSS0039374.1	CSS0039374	CSS0039374	Protein phosphatase inhibitor 2 like, partial [Actinidia chinensis var. chinensis]	562-579	2.5	GO:0000164(protein phosphatase type 1 complex);GO:0004864(protein phosphatase inhibitor activity);GO:0043666(regulation of phosphoprotein phosphatase activity)
ath-MIR169g-p3_2ss7AG19GA	CSS0024856.1	CSS0024856	CSS0024856	PREDICTED: uncharacterized protein LOC104597747 [Nelumbo nucifera]	139-157	1.5	GO:0000981(RNA polymerase II transcription factor activity, sequence-specific DNA binding);GO:0001135(transcription factor activity, RNA polymerase II transcription factor recruiting);GO:0003677(DNA binding);GO:0003700(DNA binding transcription factor activity);GO:0005515(protein binding);GO:0005634(nucleus);GO:0006351(transcription, DNA-templated);GO:0006355(regulation of transcription, DNA-temp…
ath-MIR169g-p3_2ss7AG19GA	CSS0002108.1	CSS0002108	CSS0002108	Low-temperature-induced protein [Actinidia chinensis var. chinensis]	115-133	2.5	GO:0003674(molecular_function);GO:0005737(cytoplasm);GO:0006950(response to stress);GO:0009409(response to cold);GO:0009414(response to water deprivation);GO:0009651(response to salt stress);GO:0009737(response to abscisic acid);GO:0009738(abscisic acid-activated signaling pathway);GO:0010150(leaf senescence)
ath-MIR169g-p3_2ss7AG19GA	CSS0007027.1	CSS0007027	CSS0007027	Low-temperature-induced protein [Actinidia chinensis var. chinensis]	115-133	2.5	GO:0003674(molecular_function);GO:0005737(cytoplasm);GO:0006950(response to stress);GO:0009409(response to cold);GO:0009414(response to water deprivation);GO:0009651(response to salt stress);GO:0009737(response to abscisic acid);GO:0009738(abscisic acid-activated signaling pathway);GO:0010150(leaf senescence)
ath-MIR169g-p3_2ss7AG19GA	CSS0047795.1	CSS0047795	CSS0047795	U-box domain-containing protein [Actinidia chinensis var. chinensis]	103-122	2	GO:0004672(protein kinase activity);GO:0004842(ubiquitin-protein transferase activity);GO:0005524(ATP binding);GO:0005634(nucleus);GO:0005886(plasma membrane);GO:0006468(protein phosphorylation);GO:0016301(kinase activity);GO:0016567(protein ubiquitination)
ath-MIR169g-p3_2ss7AG19GA	CSS0048997.1	CSS0048997	CSS0048997	transmembrane protein 184C [Prunus avium]	364-382	2.5	GO:0005215(transporter activity);GO:0006810(transport);GO:0016021(integral component of membrane)
ath-MIR169g-p3_2ss7AG19GA	CSS0002355.1	CSS0002355	CSS0002355	GON-4-like protein [Actinidia chinensis var. chinensis]	19-37	2.5	GO:0003674(molecular_function);GO:0005575(cellular_component);GO:0015031(protein transport)
ath-MIR169g-p3_2ss7AG19GA	CSS0039110.1	CSS0039110	CSS0039110	protein SUPPRESSOR OF K(+) TRANSPORT GROWTH DEFECT 1-like [Olea europaea var. sylvestris]	272-290	2.5	GO:0005634(nucleus);GO:0007033(vacuole organization);GO:0008568(microtubule-severing ATPase activity);GO:0031122(cytoplasmic microtubule organization)	ko04144(Endocytosis)
ath-MIR169g-p3_2ss7AG19GA	CSS0000928.1	CSS0000928	CSS0000928	protein SUPPRESSOR OF K(+) TRANSPORT GROWTH DEFECT 1-like [Olea europaea var. sylvestris]	272-290	2.5	GO:0005634(nucleus);GO:0007033(vacuole organization);GO:0008568(microtubule-severing ATPase activity);GO:0031122(cytoplasmic microtubule organization)	ko04144(Endocytosis)
ath-MIR169g-p3_2ss7AG19GA	CSS0032590.1	CSS0032590	CSS0032590	Mitochondrial import inner membrane translocase subunit TIM17-2 like [Actinidia chinensis var. chinensis]	769-786	2.5	GO:0005744(mitochondrial inner membrane presequence translocase complex);GO:0030150(protein import into mitochondrial matrix);GO:0031305(integral component of mitochondrial inner membrane)
ath-MIR169g-p3_2ss7AG19GA	CSS0026258.1	CSS0026258	CSS0026258	Mitochondrial import inner membrane translocase subunit TIM17-2 like [Actinidia chinensis var. chinensis]	860-877	2.5	GO:0005744(mitochondrial inner membrane presequence translocase complex);GO:0030150(protein import into mitochondrial matrix);GO:0031305(integral component of mitochondrial inner membrane)
ath-MIR169g-p3_2ss7AG19GA	CSS0043465.1	CSS0043465	CSS0043465	Inactive receptor kinase [Actinidia chinensis var. chinensis]	183-202	2.5	GO:0004672(protein kinase activity);GO:0004674(protein serine/threonine kinase activity);GO:0005524(ATP binding);GO:0005886(plasma membrane);GO:0006468(protein phosphorylation);GO:0007169(transmembrane receptor protein tyrosine kinase signaling pathway);GO:0016021(integral component of membrane);GO:0016301(kinase activity)
ath-MIR169g-p3_2ss7AG19GA	CSS0005955.1	CSS0005955	CSS0005955	protein ELF4-LIKE 1 isoform X1 [Populus trichocarpa]	485-503	2.5	GO:0003674(molecular_function);GO:0005634(nucleus);GO:0042753(positive regulation of circadian rhythm);GO:0048511(rhythmic process)
ath-MIR169g-p3_2ss7AG19GA	CSS0005710.1	CSS0005710	CSS0005710	protein RICE SALT SENSITIVE 3-like isoform X1 [Coffea arabica]	1291-1308	2.5	GO:0004674(protein serine/threonine kinase activity);GO:0005829(cytosol);GO:0006468(protein phosphorylation);GO:0035556(intracellular signal transduction)
ath-MIR169g-p3_2ss7AG19GA	CSS0047621.1	CSS0047621	CSS0047621	Receptory region, transmembrane domain- and RING domain-containing protein [Actinidia chinensis var. chinensis]	243-261	2.5	GO:0043161(proteasome-mediated ubiquitin-dependent protein catabolic process);GO:0061630(ubiquitin protein ligase activity)
ath-MIR169g-p3_2ss7AG19GA	CSS0018356.1	CSS0018356	CSS0018356	protein RICE SALT SENSITIVE 3-like isoform X1 [Coffea arabica]	1043-1060	2.5	GO:0004674(protein serine/threonine kinase activity);GO:0005829(cytosol);GO:0006468(protein phosphorylation);GO:0035556(intracellular signal transduction)
ath-MIR169g-p3_2ss7AG19GA	CSS0047657.1	CSS0047657	CSS0047657	hypothetical protein MIMGU_mgv1a000166mg [Erythranthe guttata]	92-110	2.5	GO:0004674(protein serine/threonine kinase activity);GO:0005886(plasma membrane);GO:0006468(protein phosphorylation);GO:0006952(defense response);GO:0009506(plasmodesma)
ath-MIR169g-p3_2ss7AG19GA	CSS0011909.1	CSS0011909	CSS0011909	U3 small nucleolar RNA-associated protein [Actinidia chinensis var. chinensis]	1010-1027	2.5	GO:0000462(maturation of SSU-rRNA from tricistronic rRNA transcript (SSU-rRNA, 5.8S rRNA, LSU-rRNA));GO:0032040(small-subunit processome);GO:0034388(Pwp2p-containing subcomplex of 90S preribosome)	ko03008(Ribosome biogenesis in eukaryotes)
ath-MIR169g-p3_2ss7AG19GA	CSS0015496.1	CSS0015496	CSS0015496	A-kinase anchor protein like [Actinidia chinensis var. chinensis]	521-539	2	-
ath-MIR169g-p3_2ss7AG19GA	CSS0010694.1	CSS0010694	CSS0010694	Ataxin-7-like protein [Actinidia chinensis var. chinensis]	1144-1161	2	GO:0003674(molecular_function);GO:0005739(mitochondrion);GO:0042538(hyperosmotic salinity response)
ath-MIR169g-p3_2ss7AG19GA	CSS0038180.1	CSS0038180	CSS0038180	Legume lectin domain protein, partial [Actinidia chinensis var. chinensis]	250-267	1.5	GO:0002229(defense response to oomycetes);GO:0004674(protein serine/threonine kinase activity);GO:0005524(ATP binding);GO:0005886(plasma membrane);GO:0006468(protein phosphorylation);GO:0016021(integral component of membrane);GO:0016301(kinase activity);GO:0030246(carbohydrate binding)
ath-MIR169g-p3_2ss7AG19GA	CSS0011643.1	CSS0011643	CSS0011643	Formin-like protein [Actinidia chinensis var. chinensis]	172-191	1.5	GO:0003779(actin binding);GO:0005618(cell wall);GO:0005634(nucleus);GO:0005730(nucleolus);GO:0005737(cytoplasm);GO:0005819(spindle);GO:0005886(plasma membrane);GO:0009524(phragmoplast);GO:0016021(integral component of membrane)
ath-MIR169g-p3_2ss7AG19GA	CSS0043919.1	CSS0043919	CSS0043919	hypothetical protein CEY00_Acc30248 [Actinidia chinensis var. chinensis]	70-89	2	GO:0003674(molecular_function);GO:0005634(nucleus);GO:0008150(biological_process)
ath-MIR169g-p3_2ss7AG19GA	CSS0023934.1	CSS0023934	CSS0023934	unnamed protein product, partial [Vitis vinifera]	220-238	2	GO:0005634(nucleus);GO:0006355(regulation of transcription, DNA-templated);GO:0044212(transcription regulatory region DNA binding)	ko04075(Plant hormone signal transduction)
ath-MIR169g-p3_2ss7AG19GA	CSS0005755.1	CSS0005755	CSS0005755	Retrovirus-related Pol polyprotein from transposon TNT 1-94 [Dendrobium catenatum]	5-23	2	GO:0005739(mitochondrion)	ko04144(Endocytosis)
ath-MIR169g-p3_2ss7AG19GA	CSS0000189.1	CSS0000189	CSS0000189	PREDICTED: aluminum-activated malate transporter 12 [Theobroma cacao]	746-764	2.5	GO:0009705(plant-type vacuole membrane);GO:0015140(malate transmembrane transporter activity)
ath-MIR169g-p3_2ss7AG19GA	CSS0002654.1	CSS0002654	CSS0002654	zf-Dof domain-containing protein [Cephalotus follicularis]	509-528	1.5	GO:0003677(DNA binding);GO:0003700(DNA binding transcription factor activity);GO:0005634(nucleus);GO:0006351(transcription, DNA-templated);GO:0006355(regulation of transcription, DNA-templated);GO:0043565(sequence-specific DNA binding);GO:0044212(transcription regulatory region DNA binding);GO:0046872(metal ion binding)
ath-MIR169g-p3_2ss7AG19GA	CSS0013529.1	CSS0013529	CSS0013529	uncharacterized protein LOC110408868 [Herrania umbratica]	54-72	0.5	GO:0003674(molecular_function);GO:0005634(nucleus);GO:0009793(embryo development ending in seed dormancy)
ath-MIR169g-p3_2ss7AG19GA	CSS0005691.1	CSS0005691	CSS0005691	zf-Dof domain-containing protein [Cephalotus follicularis]	387-406	1.5	GO:0003677(DNA binding);GO:0003700(DNA binding transcription factor activity);GO:0005634(nucleus);GO:0006351(transcription, DNA-templated);GO:0006355(regulation of transcription, DNA-templated);GO:0043565(sequence-specific DNA binding);GO:0044212(transcription regulatory region DNA binding);GO:0046872(metal ion binding)
ath-MIR169g-p3_2ss7AG19GA	CSS0002145.1	CSS0002145	CSS0002145	LON 2 protease [Vaccinium corymbosum]	3113-3131	2.5	GO:0004176(ATP-dependent peptidase activity);GO:0005782(peroxisomal matrix);GO:0006515(protein quality control for misfolded or incompletely synthesized proteins);GO:0006625(protein targeting to peroxisome);GO:0016485(protein processing)
ath-MIR169g-p3_2ss7AG19GA	CSS0044504.1	CSS0044504	CSS0044504	Protein IDA-LIKE 2 like [Actinidia chinensis var. chinensis]	260-278	2.5	GO:0005576(extracellular region);GO:0005615(extracellular space);GO:0010227(floral organ abscission)
ath-MIR169g-p3_2ss7AG19GA	CSS0011982.1	CSS0011982	CSS0011982	IAA-alanine resistance protein [Actinidia chinensis var. chinensis]	451-469	2	GO:0005385(zinc ion transmembrane transporter activity);GO:0006882(cellular zinc ion homeostasis);GO:0071577(zinc II ion transmembrane transport)
ath-MIR169g-p3_2ss7AG19GA	CSS0049068.1	CSS0049068	CSS0049068	Systemin receptor like [Actinidia chinensis var. chinensis]	148-167	2.5	GO:0004672(protein kinase activity);GO:0004674(protein serine/threonine kinase activity);GO:0004714(transmembrane receptor protein tyrosine kinase activity);GO:0005496(steroid binding);GO:0005515(protein binding);GO:0005524(ATP binding);GO:0005768(endosome);GO:0005886(plasma membrane);GO:0009506(plasmodesma);GO:0009729(detection of brassinosteroid stimulus);GO:0009742(brassinosteroid mediated sig…	ko04075(Plant hormone signal transduction)
ath-MIR169g-p3_2ss7AG19GA	CSS0004133.1	CSS0004133	CSS0004133	unnamed protein product, partial [Vitis vinifera]	304-322	2.5	GO:0005634(nucleus);GO:0006355(regulation of transcription, DNA-templated);GO:0044212(transcription regulatory region DNA binding)	ko04075(Plant hormone signal transduction)
ath-MIR169g-p3_2ss7AG19GA	CSS0023760.1	CSS0023760	CSS0023760	hypothetical protein CK203_087786 [Vitis vinifera]	353-371	2	GO:0003674(molecular_function);GO:0005739(mitochondrion);GO:0008150(biological_process);GO:0016021(integral component of membrane)
ath-MIR169g-p3_2ss7AG19GA	CSS0032778.1	CSS0032778	CSS0032778	F-box/LRR-repeat protein [Actinidia chinensis var. chinensis]	1324-1342	2.5	GO:0005634(nucleus)
ath-MIR169g-p3_2ss7AG19GA	CSS0004703.1	CSS0004703	CSS0004703	hypothetical protein CK203_087786 [Vitis vinifera]	353-371	2	GO:0003674(molecular_function);GO:0005739(mitochondrion);GO:0008150(biological_process);GO:0016021(integral component of membrane)
ath-MIR169g-p3_2ss7AG19GA	CSS0046858.1	CSS0046858	CSS0046858	Multidrug resistance protein [Actinidia chinensis var. chinensis]	294-312	2.5	GO:0005351(carbohydrate:proton symporter activity);GO:0005739(mitochondrion);GO:0015144(carbohydrate transmembrane transporter activity);GO:0016020(membrane);GO:0016021(integral component of membrane);GO:0055085(transmembrane transport)
ath-MIR169g-p3_2ss7AG19GA	CSS0046858.1	CSS0046858	CSS0046858	Multidrug resistance protein [Actinidia chinensis var. chinensis]	66-85	2.5	GO:0005351(carbohydrate:proton symporter activity);GO:0005739(mitochondrion);GO:0015144(carbohydrate transmembrane transporter activity);GO:0016020(membrane);GO:0016021(integral component of membrane);GO:0055085(transmembrane transport)
ath-MIR169g-p3_2ss7AG19GA	CSS0020543.1	CSS0020543	CSS0020543	Cytochrome P450 90B1 like [Actinidia chinensis var. chinensis]	1382-1399	1.5	GO:0004497(monooxygenase activity);GO:0005783(endoplasmic reticulum);GO:0007275(multicellular organism development);GO:0010268(brassinosteroid homeostasis);GO:0016125(sterol metabolic process);GO:0016132(brassinosteroid biosynthetic process)	ko00905(Brassinosteroid biosynthesis)
ath-MIR169g-p3_2ss7AG19GA	CSS0019913.1	CSS0019913	CSS0019913	Transcription factor like [Actinidia chinensis var. chinensis]	236-254	1.5	GO:0000981(RNA polymerase II transcription factor activity, sequence-specific DNA binding);GO:0001135(transcription factor activity, RNA polymerase II transcription factor recruiting);GO:0003677(DNA binding);GO:0003682(chromatin binding);GO:0003700(DNA binding transcription factor activity);GO:0005515(protein binding);GO:0005634(nucleus);GO:0006351(transcription, DNA-templated);GO:0006355(regulat…
ath-MIR169g-p3_2ss7AG19GA	CSS0003679.1	CSS0003679	CSS0003679	RHOMBOID-like protein [Actinidia chinensis var. chinensis]	641-660	2.5	GO:0004252(serine-type endopeptidase activity);GO:0016485(protein processing)	ko00510(N-Glycan biosynthesis)
ath-MIR169g-p3_2ss7AG19GA	CSS0021529.1	CSS0021529	CSS0021529	RHOMBOID-like protein [Actinidia chinensis var. chinensis]	926-945	2.5	GO:0004252(serine-type endopeptidase activity);GO:0016485(protein processing)	ko00510(N-Glycan biosynthesis)
ath-MIR169g-p3_2ss7AG19GA	CSS0020023.1	CSS0020023	CSS0020023	PREDICTED: WD repeat-containing protein 20 homolog [Solanum tuberosum]	417-435	2	GO:0000166(nucleotide binding);GO:0008150(biological_process);GO:0009507(chloroplast)	ko03008(Ribosome biogenesis in eukaryotes);ko04712(Circadian rhythm - plant)
ath-MIR169g-p3_2ss7AG19GA	CSS0046385.1	CSS0046385	CSS0046385	unnamed protein product, partial [Vitis vinifera]	1045-1062	2.5	GO:0000783(nuclear telomere cap complex);GO:0010521(telomerase inhibitor activity);GO:0016233(telomere capping);GO:0032210(regulation of telomere maintenance via telomerase);GO:0051974(negative regulation of telomerase activity);GO:0098505(G-rich strand telomeric DNA binding)
ath-MIR169g-p3_2ss7AG19GA	CSS0037973.1	CSS0037973	CSS0037973	PREDICTED: claspin-like [Nicotiana tomentosiformis]	335-353	2.5	-
ath-MIR169g-p3_2ss7AG19GA	CSS0006976.1	CSS0006976	CSS0006976	E3 ubiquitin-protein ligase RHA2B-like [Herrania umbratica]	415-433	1	GO:0043161(proteasome-mediated ubiquitin-dependent protein catabolic process);GO:0061630(ubiquitin protein ligase activity)
ath-MIR169g-p3_2ss7AG19GA	CSS0020246.1	CSS0020246	CSS0020246	E3 ubiquitin-protein ligase RHA2B-like [Herrania umbratica]	429-447	1	GO:0043161(proteasome-mediated ubiquitin-dependent protein catabolic process);GO:0061630(ubiquitin protein ligase activity)
ath-MIR169g-p3_2ss7AG19GA	CSS0017232.1	CSS0017232	CSS0017232	Splicing factor 3B subunit like [Actinidia chinensis var. chinensis]	133-151	2.5	GO:0003674(molecular_function);GO:0005634(nucleus);GO:0008150(biological_process)
ath-MIR169g-p3_2ss7AG19GA	CSS0029909.1	CSS0029909	CSS0029909	PREDICTED: uncharacterized protein LOC109156985 [Ipomoea nil]	137-156	2	GO:0003674(molecular_function);GO:0005576(extracellular region);GO:0008150(biological_process);GO:0016021(integral component of membrane)
ath-MIR169g-p3_2ss7AG19GA	CSS0040839.1	CSS0040839	CSS0040839	Expansin-A13 like [Actinidia chinensis var. chinensis]	104-122	2.5	GO:0005576(extracellular region);GO:0005618(cell wall);GO:0009664(plant-type cell wall organization);GO:0009826(unidimensional cell growth);GO:0009828(plant-type cell wall loosening);GO:0009831(plant-type cell wall modification involved in multidimensional cell growth);GO:0016020(membrane)
ath-MIR169g-p3_2ss7AG19GA	CSS0035334.1	CSS0035334	CSS0035334	PREDICTED: uncharacterized protein LOC109156985 [Ipomoea nil]	80-99	2	GO:0003674(molecular_function);GO:0005576(extracellular region);GO:0008150(biological_process);GO:0016021(integral component of membrane)
ath-MIR169g-p3_2ss7AG19GA	CSS0018285.1	CSS0018285	CSS0018285	PREDICTED: B2 protein [Theobroma cacao]	893-911	2	GO:0005515(protein binding);GO:0005634(nucleus);GO:0005737(cytoplasm)
ath-MIR169g-p3_2ss7AG19GA	CSS0045258.1	CSS0045258	CSS0045258	PREDICTED: B2 protein [Theobroma cacao]	888-906	2	GO:0005515(protein binding);GO:0005634(nucleus);GO:0005737(cytoplasm)
ath-MIR169g-p3_2ss7AG19GA	CSS0022368.1	CSS0022368	CSS0022368	uncharacterized protein LOC111369523 [Olea europaea var. sylvestris]	1-18	2.5	GO:0003674(molecular_function);GO:0005739(mitochondrion);GO:0006886(intracellular protein transport);GO:0006888(ER to Golgi vesicle-mediated transport);GO:0016021(integral component of membrane)
ath-MIR169g-p3_2ss7AG19GA	CSS0048511.1	CSS0048511	CSS0048511	hypothetical protein CEY00_Acc01165 [Actinidia chinensis var. chinensis]	726-743	2	GO:0000981(RNA polymerase II transcription factor activity, sequence-specific DNA binding);GO:0001135(transcription factor activity, RNA polymerase II transcription factor recruiting);GO:0003677(DNA binding);GO:0003700(DNA binding transcription factor activity);GO:0005634(nucleus);GO:0006355(regulation of transcription, DNA-templated);GO:0006357(regulation of transcription by RNA polymerase II);G…
ath-MIR169g-p3_2ss7AG19GA	CSS0039005.1	CSS0039005	CSS0039005	dof zinc finger protein DOF4.6-like isoform X1 [Hevea brasiliensis]	454-471	2	GO:0003677(DNA binding);GO:0003700(DNA binding transcription factor activity);GO:0005634(nucleus);GO:0006351(transcription, DNA-templated);GO:0006355(regulation of transcription, DNA-templated);GO:0046872(metal ion binding)
ath-MIR169g-p3_2ss7AG19GA	CSS0038762.1	CSS0038762	CSS0038762	hypothetical protein DM860_016030 [Cuscuta australis]	101-119	2.5	GO:0001735(prenylcysteine oxidase activity);GO:0005774(vacuolar membrane);GO:0030327(prenylated protein catabolic process);GO:0030328(prenylcysteine catabolic process)	ko00900(Terpenoid backbone biosynthesis)
ath-MIR169g-p3_2ss7AG19GA	CSS0013399.1	CSS0013399	CSS0013399	DnaJ subfamily B member like [Actinidia chinensis var. chinensis]	60-79	2.5	GO:0005737(cytoplasm);GO:0006457(protein folding);GO:0051082(unfolded protein binding)
ath-MIR169g-p3_2ss7AG19GA	CSS0016764.1	CSS0016764	CSS0016764	Beta-D-xylosidase [Actinidia chinensis var. chinensis]	106-124	2.5	GO:0009044(xylan 1,4-beta-xylosidase activity);GO:0009505(plant-type cell wall);GO:0031222(arabinan catabolic process);GO:0045493(xylan catabolic process);GO:0046556(alpha-L-arabinofuranosidase activity)	ko00520(Amino sugar and nucleotide sugar metabolism)
ath-MIR169g-p3_2ss7AG19GA	CSS0039604.1	CSS0039604	CSS0039604	Myb-related protein 308 [Glycine soja]	660-678	2.5	GO:0000981(RNA polymerase II transcription factor activity, sequence-specific DNA binding);GO:0001135(transcription factor activity, RNA polymerase II transcription factor recruiting);GO:0003677(DNA binding);GO:0003700(DNA binding transcription factor activity);GO:0005515(protein binding);GO:0005634(nucleus);GO:0006351(transcription, DNA-templated);GO:0006355(regulation of transcription, DNA-temp…
ath-MIR169g-p3_2ss7AG19GA	CSS0006188.1	CSS0006188	CSS0006188	Myb-related protein 308 [Glycine soja]	640-658	2.5	GO:0000981(RNA polymerase II transcription factor activity, sequence-specific DNA binding);GO:0001135(transcription factor activity, RNA polymerase II transcription factor recruiting);GO:0003677(DNA binding);GO:0003700(DNA binding transcription factor activity);GO:0005515(protein binding);GO:0005634(nucleus);GO:0006351(transcription, DNA-templated);GO:0006355(regulation of transcription, DNA-temp…
ath-MIR169g-p3_2ss7AG19GA	CSS0032185.1	CSS0032185	CSS0032185	glucuronoxylan 4-O-methyltransferase 3 [Manihot esculenta]	27-45	2.5	GO:0000139(Golgi membrane);GO:0005739(mitochondrion);GO:0005794(Golgi apparatus);GO:0005976(polysaccharide metabolic process);GO:0009808(lignin metabolic process);GO:0016021(integral component of membrane);GO:0030775(glucuronoxylan 4-O-methyltransferase activity);GO:0032259(methylation);GO:0045491(xylan metabolic process);GO:0045492(xylan biosynthetic process)
ath-MIR169g-p3_2ss7AG19GA	CSS0034271.1	CSS0034271	CSS0034271	Transcription factor like [Actinidia chinensis var. chinensis]	635-652	2	GO:0000981(RNA polymerase II transcription factor activity, sequence-specific DNA binding);GO:0001135(transcription factor activity, RNA polymerase II transcription factor recruiting);GO:0003677(DNA binding);GO:0003700(DNA binding transcription factor activity);GO:0005634(nucleus);GO:0006355(regulation of transcription, DNA-templated);GO:0006357(regulation of transcription by RNA polymerase II);G…
ath-MIR169g-p3_2ss7AG19GA	CSS0018547.1	CSS0018547	CSS0018547	PLASMODESMATA CALLOSE-BINDING PROTEIN 5 like, partial [Actinidia chinensis var. chinensis]	252-270	2.5	GO:0004553(hydrolase activity, hydrolyzing O-glycosyl compounds);GO:0030247(polysaccharide binding);GO:0046658(anchored component of plasma membrane)	ko00500(Starch and sucrose metabolism)
ath-MIR169g-p3_2ss7AG19GA	CSS0042264.1	CSS0042264	CSS0042264	PREDICTED: probable serine/threonine-protein kinase Cx32, chloroplastic isoform X2 [Nicotiana attenuata]	1411-1428	2	GO:0004675(transmembrane receptor protein serine/threonine kinase activity);GO:0005524(ATP binding);GO:0005634(nucleus);GO:0005886(plasma membrane);GO:0006468(protein phosphorylation);GO:0006952(defense response);GO:0007166(cell surface receptor signaling pathway);GO:0009507(chloroplast);GO:0016301(kinase activity)
ath-MIR169g-p3_2ss7AG19GA	CSS0022020.1	CSS0022020	CSS0022020	Caffeoylshikimate esterase [Actinidia chinensis var. chinensis]	2739-2758	2.5	GO:0006629(lipid metabolic process);GO:0016020(membrane);GO:0016298(lipase activity)	ko00561(Glycerolipid metabolism)
ath-MIR169g-p3_2ss7AG19GA	CSS0023663.1	CSS0023663	CSS0023663	G-type lectin S-receptor-like serine/threonine-protein kinase [Actinidia chinensis var. chinensis]	1241-1259	2.5	GO:0004674(protein serine/threonine kinase activity);GO:0005886(plasma membrane);GO:0006468(protein phosphorylation)
ath-MIR169g-p3_2ss7AG19GA	CSS0035810.1	CSS0035810	CSS0035810	Mitogen-activated protein kinase [Actinidia chinensis var. chinensis]	61-80	2.5	-	ko04016(MAPK signaling pathway - plant)
ath-MIR169g-p3_2ss7AG19GA	CSS0037749.1	CSS0037749	CSS0037749	Ferritin like [Actinidia chinensis var. chinensis]	63-80	2	GO:0000302(response to reactive oxygen species);GO:0004322(ferroxidase activity);GO:0005506(iron ion binding);GO:0005737(cytoplasm);GO:0005739(mitochondrion);GO:0006826(iron ion transport);GO:0006879(cellular iron ion homeostasis);GO:0006880(intracellular sequestering of iron ion);GO:0008199(ferric iron binding);GO:0009409(response to cold);GO:0009507(chloroplast);GO:0009535(chloroplast thylakoid…
ath-MIR169g-p3_2ss7AG19GA	CSS0015855.1	CSS0015855	CSS0015855	Mitogen-activated protein kinase [Actinidia chinensis var. chinensis]	128-147	2	GO:0004707(MAP kinase activity);GO:0005524(ATP binding);GO:0005634(nucleus);GO:0005737(cytoplasm);GO:0007165(signal transduction);GO:0010468(regulation of gene expression);GO:0016301(kinase activity)	ko04016(MAPK signaling pathway - plant)
ath-MIR169g-p3_2ss7AG19GA	CSS0037047.1	CSS0037047	CSS0037047	Ferritin like [Actinidia chinensis var. chinensis]	66-83	2	GO:0000302(response to reactive oxygen species);GO:0004322(ferroxidase activity);GO:0005506(iron ion binding);GO:0005737(cytoplasm);GO:0005739(mitochondrion);GO:0006826(iron ion transport);GO:0006879(cellular iron ion homeostasis);GO:0006880(intracellular sequestering of iron ion);GO:0008199(ferric iron binding);GO:0009409(response to cold);GO:0009507(chloroplast);GO:0009535(chloroplast thylakoid…
ath-MIR169g-p3_2ss7AG19GA	CSS0050163.1	CSS0050163	CSS0050163	PREDICTED: proteasome subunit alpha type-7 [Vitis vinifera]	149-167	2	GO:0000502(proteasome complex);GO:0004298(threonine-type endopeptidase activity);GO:0005634(nucleus);GO:0005737(cytoplasm);GO:0005773(vacuole);GO:0005839(proteasome core complex);GO:0006511(ubiquitin-dependent protein catabolic process);GO:0008233(peptidase activity);GO:0009507(chloroplast);GO:0019773(proteasome core complex, alpha-subunit complex)	ko03050(Proteasome)
ath-MIR169g-p3_2ss7AG19GA	CSS0016555.1	CSS0016555	CSS0016555	putative protein kinase RLK-Pelle-LRR-XII-1 family [Rosa chinensis]	75-94	2.5	GO:0004672(protein kinase activity);GO:0005886(plasma membrane)
ath-MIR169g-p3_2ss7AG19GA	CSS0037884.1	CSS0037884	CSS0037884	Peptidyl-tRNA hydrolase [Actinidia chinensis var. chinensis]	27-44	2	GO:0004045(aminoacyl-tRNA hydrolase activity);GO:0005739(mitochondrion);GO:0032543(mitochondrial translation)
ath-MIR169g-p3_2ss7AG19GA	CSS0002084.1	CSS0002084	CSS0002084	hypothetical protein COLO4_21914 [Corchorus olitorius]	180-197	2	-
ath-MIR169g-p3_2ss7AG19GA	CSS0002500.1	CSS0002500	CSS0002500	Serine/threonine-protein phosphatase 7 long form like [Actinidia chinensis var. chinensis]	1287-1305	2.5	GO:0005634(nucleus);GO:0008150(biological_process)
ath-MIR169g-p3_2ss7AG19GA	CSS0014815.1	CSS0014815	CSS0014815	Serine/threonine-protein phosphatase 7 long form like [Actinidia chinensis var. chinensis]	1162-1180	2.5	GO:0005634(nucleus);GO:0008150(biological_process)
ath-MIR169g-p3_2ss7AG19GA	CSS0016709.1	CSS0016709	CSS0016709	uncharacterized protein LOC113695793 isoform X2 [Coffea arabica]	168-186	2.5	GO:0003746(translation elongation factor activity);GO:0006414(translational elongation);GO:0009507(chloroplast);GO:0009570(chloroplast stroma)
ath-MIR169g-p3_2ss7AG19GA	CSS0006704.1	CSS0006704	CSS0006704	uncharacterized protein LOC113695793 isoform X1 [Coffea arabica]	50-68	2	GO:0003746(translation elongation factor activity);GO:0006414(translational elongation);GO:0009507(chloroplast);GO:0009570(chloroplast stroma)
ath-MIR169g-p3_2ss7AG19GA	CSS0004149.1	CSS0004149	CSS0004149	Protein LURP-one-related like [Actinidia chinensis var. chinensis]	429-446	2.5	GO:0006952(defense response)
ath-MIR169g-p3_2ss7AG19GA	CSS0007793.1	CSS0007793	CSS0007793	PREDICTED: LOB domain-containing protein 6 [Prunus mume]	8-26	2.5	GO:0005515(protein binding);GO:0005634(nucleus);GO:0005654(nucleoplasm);GO:0009799(specification of symmetry);GO:0009943(adaxial/abaxial axis specification);GO:0009944(polarity specification of adaxial/abaxial axis);GO:0009954(proximal/distal pattern formation);GO:0048441(petal development)
ath-MIR169g-p3_2ss7AG19GA	CSS0009291.1	CSS0009291	CSS0009291	PREDICTED: putative disease resistance protein RGA4, partial [Cucumis melo]	238-256	2	-
ath-MIR169g-p3_2ss7AG19GA	CSS0045656.1	CSS0045656	CSS0045656	ALA-interacting subunit like [Actinidia chinensis var. chinensis]	170-188	1.5	GO:0000139(Golgi membrane);GO:0005789(endoplasmic reticulum membrane);GO:0005794(Golgi apparatus);GO:0015914(phospholipid transport);GO:0016020(membrane);GO:0016021(integral component of membrane);GO:0031902(late endosome membrane)
ath-MIR169g-p3_2ss7AG19GA	CSS0014600.1	CSS0014600	CSS0014600	Beta-D-xylosidase [Actinidia chinensis var. chinensis]	48-66	2.5	GO:0009044(xylan 1,4-beta-xylosidase activity);GO:0009505(plant-type cell wall);GO:0031222(arabinan catabolic process);GO:0045493(xylan catabolic process);GO:0046556(alpha-L-arabinofuranosidase activity)	ko00520(Amino sugar and nucleotide sugar metabolism)
ath-MIR169g-p3_2ss7AG19GA	CSS0009108.1	CSS0009108	CSS0009108	Beta-D-xylosidase [Actinidia chinensis var. chinensis]	68-86	2.5	GO:0009044(xylan 1,4-beta-xylosidase activity);GO:0009505(plant-type cell wall);GO:0031222(arabinan catabolic process);GO:0045493(xylan catabolic process);GO:0046556(alpha-L-arabinofuranosidase activity)	ko00520(Amino sugar and nucleotide sugar metabolism)
ath-MIR169g-p3_2ss7AG19GA	CSS0033946.1	CSS0033946	CSS0033946	Serine-rich adhesin for platelets like [Actinidia chinensis var. chinensis]	3791-3809	2.5	GO:0006368(transcription elongation from RNA polymerase II promoter);GO:0070449(elongin complex)
ath-MIR169g-p3_2ss7AG19GA	CSS0049699.1	CSS0049699	CSS0049699	COMPASS-like H3K4 histone methylase component WDR5A [Vitis vinifera]	43-61	2.5	GO:0000166(nucleotide binding);GO:0005634(nucleus);GO:0005834(heterotrimeric G-protein complex);GO:0008150(biological_process);GO:0080008(Cul4-RING E3 ubiquitin ligase complex)
ath-MIR169g-p3_2ss7AG19GA	CSS0010094.1	CSS0010094	CSS0010094	WUSCHEL-related homeobox 11-like [Hevea brasiliensis]	419-436	2	GO:0003677(DNA binding);GO:0003700(DNA binding transcription factor activity);GO:0005634(nucleus);GO:0006351(transcription, DNA-templated);GO:0006355(regulation of transcription, DNA-templated);GO:0048830(adventitious root development)
ath-MIR169g-p3_2ss7AG19GA	CSS0037425.1	CSS0037425	CSS0037425	hypothetical protein CEY00_Acc20887 [Actinidia chinensis var. chinensis]	886-904	2.5	GO:0008150(biological_process);GO:0016020(membrane)	ko00620(Pyruvate metabolism)
ath-MIR169g-p3_2ss7AG19GA	CSS0041224.1	CSS0041224	CSS0041224	Cytochrome c oxidase subunit 6a like [Actinidia chinensis var. chinensis]	356-374	2.5	GO:0004129(cytochrome-c oxidase activity);GO:0005739(mitochondrion);GO:0005751(mitochondrial respiratory chain complex IV);GO:0016021(integral component of membrane)	ko00190(Oxidative phosphorylation)
ath-MIR169g-p3_2ss7AG19GA	CSS0047057.1	CSS0047057	CSS0047057	Cytochrome c oxidase subunit 6a like [Actinidia chinensis var. chinensis]	424-442	2.5	GO:0004129(cytochrome-c oxidase activity);GO:0005739(mitochondrion);GO:0005751(mitochondrial respiratory chain complex IV);GO:0016021(integral component of membrane)	ko00190(Oxidative phosphorylation)
ath-MIR169g-p3_2ss7AG19GA	CSS0004634.1	CSS0004634	CSS0004634	cationic amino acid transporter 2 [Camellia sinensis]	76-95	2.5	GO:0005887(integral component of plasma membrane);GO:0015179(L-amino acid transmembrane transporter activity);GO:0015297(antiporter activity)
ath-MIR169g-p3_2ss7AG19GA	CSS0030628.1	CSS0030628	CSS0030628	protein SUPPRESSOR OF K(+) TRANSPORT GROWTH DEFECT 1-like [Olea europaea var. sylvestris]	272-290	2.5	GO:0005634(nucleus);GO:0007033(vacuole organization);GO:0008568(microtubule-severing ATPase activity);GO:0031122(cytoplasmic microtubule organization)	ko04144(Endocytosis)
ath-MIR169g-p3_2ss7AG19GA	CSS0001712.1	CSS0001712	CSS0001712	protein SHORT-ROOT [Coffea eugenioides]	34-52	2	GO:0003700(DNA binding transcription factor activity);GO:0005634(nucleus);GO:0006355(regulation of transcription, DNA-templated);GO:0008356(asymmetric cell division);GO:0009956(radial pattern formation);GO:0043565(sequence-specific DNA binding);GO:0045930(negative regulation of mitotic cell cycle);GO:0048366(leaf development);GO:0055072(iron ion homeostasis)	ko04075(Plant hormone signal transduction)
ath-MIR169g-p3_2ss7AG19GA	CSS0002661.1	CSS0002661	CSS0002661	unnamed protein product, partial [Vitis vinifera]	1407-1425	2	GO:0005575(cellular_component);GO:0008150(biological_process);GO:0016740(transferase activity)
ath-MIR169g-p3_2ss7AG19GA	CSS0033902.1	CSS0033902	CSS0033902	Prolycopene isomerase [Actinidia chinensis var. chinensis]	2141-2158	2.5	GO:0009507(chloroplast);GO:0009662(etioplast organization);GO:0016117(carotenoid biosynthetic process);GO:0016491(oxidoreductase activity);GO:0031969(chloroplast membrane);GO:0046608(carotenoid isomerase activity);GO:0055114(oxidation-reduction process)	ko00906(Carotenoid biosynthesis)
ath-MIR169g-p3_2ss7AG19GA	CSS0010803.1	CSS0010803	CSS0010803	RING finger and transmembrane domain-containing protein [Actinidia chinensis var. chinensis]	77-94	2	GO:0008270(zinc ion binding);GO:0016021(integral component of membrane)
ath-MIR169g-p3_2ss7AG19GA	CSS0007538.1	CSS0007538	CSS0007538	RING-H2 finger protein ATL70-like [Manihot esculenta]	88-105	2.5	GO:0043161(proteasome-mediated ubiquitin-dependent protein catabolic process);GO:0061630(ubiquitin protein ligase activity)
ath-MIR169g-p3_2ss7AG19GA	CSS0008325.1	CSS0008325	CSS0008325	probable disease resistance protein At4g27220 [Quercus suber]	2885-2904	2	GO:0005524(ATP binding);GO:0005739(mitochondrion);GO:0006952(defense response);GO:0043531(ADP binding)	ko04626(Plant-pathogen interaction)
ath-MIR169g-p3_2ss7AG19GA	CSS0008325.1	CSS0008325	CSS0008325	probable disease resistance protein At4g27220 [Quercus suber]	2865-2883	2.5	GO:0005524(ATP binding);GO:0005739(mitochondrion);GO:0006952(defense response);GO:0043531(ADP binding)	ko04626(Plant-pathogen interaction)
ath-MIR169g-p3_2ss7AG19GA	CSS0023677.1	CSS0023677	CSS0023677	PREDICTED: WD repeat-containing protein 20 [Vitis vinifera]	94-112	2.5	GO:0000166(nucleotide binding);GO:0008150(biological_process);GO:0009507(chloroplast)	ko03008(Ribosome biogenesis in eukaryotes);ko04712(Circadian rhythm - plant)
ath-MIR169g-p3_2ss7AG19GA	CSS0045116.1	CSS0045116	CSS0045116	copper transport protein ATOX1 [Hevea brasiliensis]	54-72	2.5	GO:0005737(cytoplasm);GO:0030001(metal ion transport);GO:0046914(transition metal ion binding);GO:0046916(cellular transition metal ion homeostasis)
ath-MIR169g-p3_2ss7AG19GA	CSS0044358.1	CSS0044358	CSS0044358	Valine--tRNA ligase [Actinidia chinensis var. chinensis]	894-913	2.5	GO:0003674(molecular_function);GO:0005634(nucleus);GO:0008150(biological_process)
ath-MIR169g-p3_2ss7AG19GA	CSS0037186.1	CSS0037186	CSS0037186	LRR receptor-like serine/threonine-protein kinase precursor [Actinidia chinensis var. chinensis]	87-106	2.5	GO:0004674(protein serine/threonine kinase activity);GO:0005524(ATP binding);GO:0005886(plasma membrane);GO:0006468(protein phosphorylation);GO:0007169(transmembrane receptor protein tyrosine kinase signaling pathway);GO:0009507(chloroplast);GO:0016021(integral component of membrane);GO:0016301(kinase activity)
ath-MIR169g-p3_2ss7AG19GA	CSS0032678.1	CSS0032678	CSS0032678	Plant-specific TFIIB-related protein [Actinidia chinensis var. chinensis]	1620-1638	2.5	GO:0001093(TFIIB-class transcription factor binding);GO:0003690(double-stranded DNA binding);GO:0005515(protein binding);GO:0005634(nucleus);GO:0006355(regulation of transcription, DNA-templated);GO:0009793(embryo development ending in seed dormancy);GO:0009846(pollen germination);GO:0042803(protein homodimerization activity);GO:0046872(metal ion binding);GO:0070063(RNA polymerase binding);GO:007…
ath-MIR169g-p3_2ss7AG19GA	CSS0001500.1	CSS0001500	CSS0001500	PREDICTED: uncharacterized protein LOC104605635 [Nelumbo nucifera]	63-81	2	GO:0005737(cytoplasm);GO:0008757(S-adenosylmethionine-dependent methyltransferase activity);GO:0032259(methylation)
ath-MIR169g-p3_2ss7AG19GA	CSS0010239.1	CSS0010239	CSS0010239	L-2-hydroxyglutarate dehydrogenase [Actinidia chinensis var. chinensis]	65-83	2.5	GO:0003973((S)-2-hydroxy-acid oxidase activity);GO:0005739(mitochondrion);GO:0016491(oxidoreductase activity);GO:0047545(2-hydroxyglutarate dehydrogenase activity);GO:0055114(oxidation-reduction process);GO:0071949(FAD binding)	ko00650(Butanoate metabolism)
ath-MIR169g-p3_2ss7AG19GA	CSS0042957.1	CSS0042957	CSS0042957	Galacturonosyltransferase [Actinidia chinensis var. chinensis]	177-195	2.5	GO:0000139(Golgi membrane);GO:0005768(endosome);GO:0005794(Golgi apparatus);GO:0005802(trans-Golgi network);GO:0016021(integral component of membrane);GO:0016051(carbohydrate biosynthetic process);GO:0016757(transferase activity, transferring glycosyl groups);GO:0045489(pectin biosynthetic process);GO:0047262(polygalacturonate 4-alpha-galacturonosyltransferase activity);GO:0071555(cell wall organ…	ko00520(Amino sugar and nucleotide sugar metabolism)
ath-MIR169g-p3_2ss7AG19GA	CSS0003572.1	CSS0003572	CSS0003572	RING finger and transmembrane domain-containing protein [Actinidia chinensis var. chinensis]	173-190	2	GO:0008270(zinc ion binding);GO:0016021(integral component of membrane)
ath-MIR169g-p3_2ss7AG19GA	CSS0031139.1	CSS0031139	CSS0031139	Protein FAR1-RELATED SEQUENCE 10 [Actinidia chinensis var. chinensis]	136-155	2.5	GO:0005634(nucleus);GO:0006355(regulation of transcription, DNA-templated);GO:0008270(zinc ion binding);GO:0009639(response to red or far red light)
ath-MIR169g-p3_2ss7AG19GA	CSS0018376.1	CSS0018376	CSS0018376	EPIDERMAL PATTERNING FACTOR-like protein 8 [Glycine max]	255-272	2	GO:0010052(guard cell differentiation)
ath-MIR169g-p3_2ss7AG19GA	CSS0037009.1	CSS0037009	CSS0037009	26.5 kDa heat shock protein, mitochondrial [Manihot esculenta]	119-137	2	GO:0003674(molecular_function);GO:0005739(mitochondrion);GO:0009408(response to heat);GO:0009507(chloroplast);GO:0009644(response to high light intensity);GO:0042542(response to hydrogen peroxide)	ko04141(Protein processing in endoplasmic reticulum)
ath-MIR169g-p3_2ss7AG19GA	CSS0037478.1	CSS0037478	CSS0037478	Protein ENDOSPERM DEFECTIVE like [Actinidia chinensis var. chinensis]	386-403	2.5	GO:0000226(microtubule cytoskeleton organization);GO:0005634(nucleus);GO:0005737(cytoplasm);GO:0005813(centrosome);GO:0005880(nuclear microtubule);GO:0008017(microtubule binding);GO:0009960(endosperm development);GO:0010342(endosperm cellularization);GO:0048316(seed development);GO:0051301(cell division)
ath-MIR169g-p3_2ss7AG19GA	CSS0019076.1	CSS0019076	CSS0019076	Hypothetical protein [Arabidopsis thaliana]	1268-1286	2.5	GO:0004596(peptide alpha-N-acetyltransferase activity);GO:0005737(cytoplasm);GO:0017196(N-terminal peptidyl-methionine acetylation)	ko00230(Purine metabolism);ko00240(Pyrimidine metabolism);ko03020(RNA polymerase)
ath-MIR169g-p3_2ss7AG19GA	CSS0012394.1	CSS0012394	CSS0012394	Ubiquitin-conjugating enzyme like [Actinidia chinensis var. chinensis]	148-166	2.5	GO:0000209(protein polyubiquitination);GO:0005634(nucleus);GO:0005737(cytoplasm);GO:0030071(regulation of mitotic metaphase/anaphase transition);GO:0031145(anaphase-promoting complex-dependent catabolic process);GO:0031625(ubiquitin protein ligase binding);GO:0061630(ubiquitin protein ligase activity)	ko04120(Ubiquitin mediated proteolysis)
ath-MIR169g-p3_2ss7AG19GA	CSS0018332.2	CSS0018332	CSS0018332	Pheophytinase [Actinidia chinensis var. chinensis]	193-211	2.5	GO:0016787(hydrolase activity)
ath-MIR169g-p3_2ss7AG19GA	CSS0047140.1	CSS0047140	CSS0047140	hypothetical protein A4A49_39381 [Nicotiana attenuata]	63-80	2	GO:0005739(mitochondrion);GO:0008270(zinc ion binding);GO:0016020(membrane);GO:0097250(mitochondrial respiratory chain supercomplex assembly)
ath-MIR169g-p3_2ss7AG19GA	CSS0045401.1	CSS0045401	CSS0045401	E3 ubiquitin-protein like [Actinidia chinensis var. chinensis]	144-162	2.5	GO:0043161(proteasome-mediated ubiquitin-dependent protein catabolic process);GO:0061630(ubiquitin protein ligase activity)
ath-MIR169g-p3_2ss7AG19GA	CSS0018791.1	CSS0018791	CSS0018791	PREDICTED: uncharacterized protein LOC104593880 [Nelumbo nucifera]	366-384	2.5	GO:0016787(hydrolase activity)
ath-MIR169g-p3_2ss7AG19GA	CSS0029431.1	CSS0029431	CSS0029431	serine/threonine protein phosphatase 2A 55 kDa regulatory subunit B beta isoform isoform X2 [Solanum lycopersicum]	297-315	2.5	GO:0000159(protein phosphatase type 2A complex);GO:0000166(nucleotide binding);GO:0000278(mitotic cell cycle);GO:0004722(protein serine/threonine phosphatase activity);GO:0005515(protein binding);GO:0005737(cytoplasm);GO:0005829(cytosol);GO:0006470(protein dephosphorylation);GO:0019888(protein phosphatase regulator activity);GO:0032502(developmental process);GO:0050790(regulation of catalytic act…	ko03015(mRNA surveillance pathway)
ath-MIR169g-p3_2ss7AG19GA	CSS0033181.1	CSS0033181	CSS0033181	PREDICTED: uncharacterized protein LOC104593880 [Nelumbo nucifera]	178-196	2.5	GO:0016787(hydrolase activity)
ath-MIR169g-p3_2ss7AG19GA	CSS0016492.1	CSS0016492	CSS0016492	Protein HOTHEAD like [Actinidia chinensis var. chinensis]	209-227	2	GO:0005576(extracellular region);GO:0007267(cell-cell signaling);GO:0009553(embryo sac development);GO:0010430(fatty acid omega-oxidation);GO:0016614(oxidoreductase activity, acting on CH-OH group of donors);GO:0016832(aldehyde-lyase activity);GO:0046593(mandelonitrile lyase activity);GO:0050660(flavin adenine dinucleotide binding);GO:0055114(oxidation-reduction process)	ko00073(Cutin, suberine and wax biosynthesis)
ath-MIR169g-p3_2ss7AG19GA	CSS0047777.1	CSS0047777	CSS0047777	Trihelix transcription factor [Actinidia chinensis var. chinensis]	633-650	2	GO:0003700(DNA binding transcription factor activity);GO:0005515(protein binding);GO:0005634(nucleus);GO:0006355(regulation of transcription, DNA-templated);GO:0043565(sequence-specific DNA binding)
ath-MIR169g-p3_2ss7AG19GA	CSS0020074.1	CSS0020074	CSS0020074	Protein HOTHEAD like [Actinidia chinensis var. chinensis]	185-203	2	GO:0005576(extracellular region);GO:0007267(cell-cell signaling);GO:0009553(embryo sac development);GO:0010430(fatty acid omega-oxidation);GO:0016614(oxidoreductase activity, acting on CH-OH group of donors);GO:0016832(aldehyde-lyase activity);GO:0046593(mandelonitrile lyase activity);GO:0050660(flavin adenine dinucleotide binding);GO:0055114(oxidation-reduction process)	ko00073(Cutin, suberine and wax biosynthesis)
ath-MIR169g-p3_2ss7AG19GA	CSS0016291.1	CSS0016291	CSS0016291	ABC transporter B family member 19-like [Olea europaea var. sylvestris]	850-868	2	GO:0016021(integral component of membrane);GO:0042626(ATPase activity, coupled to transmembrane movement of substances);GO:0055085(transmembrane transport)	ko02010(ABC transporters)
ath-MIR169g-p3_2ss7AG19GA	CSS0014695.1	CSS0014695	CSS0014695	PREDICTED: 28 kDa ribonucleoprotein, chloroplastic-like [Nelumbo nucifera]	257-275	2	GO:0003723(RNA binding);GO:0003729(mRNA binding);GO:0006396(RNA processing);GO:0006397(mRNA processing);GO:0008266(poly(U) RNA binding);GO:0009409(response to cold);GO:0009451(RNA modification);GO:0009507(chloroplast);GO:0009535(chloroplast thylakoid membrane);GO:0009570(chloroplast stroma);GO:0009579(thylakoid);GO:0009631(cold acclimation);GO:0009941(chloroplast envelope);GO:0016553(base convers…
ath-MIR169g-p3_2ss7AG19GA	CSS0018901.1	CSS0018901	CSS0018901	ras-related protein RABB1b [Hevea brasiliensis]	100-118	2.5	GO:0003924(GTPase activity);GO:0005525(GTP binding);GO:0005622(intracellular);GO:0005623(cell);GO:0005737(cytoplasm);GO:0005768(endosome);GO:0005773(vacuole);GO:0005794(Golgi apparatus);GO:0005886(plasma membrane);GO:0006888(ER to Golgi vesicle-mediated transport);GO:0015031(protein transport);GO:0016020(membrane);GO:0030100(regulation of endocytosis)
ath-MIR169g-p3_2ss7AG19GA	CSS0030138.1	CSS0030138	CSS0030138	Protein BRANCHLESS TRICHOME like [Actinidia chinensis var. chinensis]	283-301	2	GO:0000902(cell morphogenesis)
ath-MIR169g-p3_2ss7AG19GA	CSS0002551.1	CSS0002551	CSS0002551	Growth-regulating factor like [Actinidia chinensis var. chinensis]	653-671	2	GO:0005524(ATP binding);GO:0005634(nucleus);GO:0006351(transcription, DNA-templated);GO:0006355(regulation of transcription, DNA-templated);GO:0009941(chloroplast envelope);GO:0032502(developmental process);GO:0048366(leaf development)
ath-MIR169g-p3_2ss7AG19GA	CSS0043054.1	CSS0043054	CSS0043054	NAC domain-containing protein [Actinidia chinensis var. chinensis]	1162-1180	2.5	GO:0003677(DNA binding);GO:0003700(DNA binding transcription factor activity);GO:0005634(nucleus);GO:0006351(transcription, DNA-templated);GO:0007275(multicellular organism development);GO:0009793(embryo development ending in seed dormancy);GO:0009809(lignin biosynthetic process);GO:0009834(plant-type secondary cell wall biogenesis);GO:0009901(anther dehiscence);GO:0010047(fruit dehiscence);GO:00…	ko03013(RNA transport);ko03015(mRNA surveillance pathway);ko03018(RNA degradation)
ath-MIR169g-p3_2ss7AG19GA	CSS0020277.1	CSS0020277	CSS0020277	Protein of unknown function DUF538 protein [Actinidia chinensis var. chinensis]	655-672	1.5	GO:0003674(molecular_function);GO:0005576(extracellular region);GO:0008150(biological_process)
ath-MIR169g-p3_2ss7AG19GA	CSS0007161.1	CSS0007161	CSS0007161	Polygalacturonase [Actinidia chinensis var. chinensis]	116-133	2.5	GO:0004650(polygalacturonase activity);GO:0005576(extracellular region);GO:0005773(vacuole);GO:0005975(carbohydrate metabolic process);GO:0009505(plant-type cell wall);GO:0016829(lyase activity);GO:0071555(cell wall organization)	ko00040(Pentose and glucuronate interconversions)
ath-MIR169g-p3_2ss7AG19GA	CSS0009616.1	CSS0009616	CSS0009616	PREDICTED: probable WRKY transcription factor 65 [Vitis vinifera]	680-698	2	GO:0003700(DNA binding transcription factor activity);GO:0005634(nucleus);GO:0006351(transcription, DNA-templated);GO:0006355(regulation of transcription, DNA-templated);GO:0043565(sequence-specific DNA binding)	ko04016(MAPK signaling pathway - plant);ko04626(Plant-pathogen interaction)
ath-MIR169g-p3_2ss7AG19GA	CSS0027129.1	CSS0027129	CSS0027129	NA	396-415	2.5	-
ath-MIR169g-p3_2ss7AG19GA	CSS0027129.1	CSS0027129	CSS0027129	NA	358-376	2	-
ath-MIR169g-p3_2ss7AG19GA	CSS0043831.1	CSS0043831	CSS0043831	PREDICTED: probable WRKY transcription factor 65 [Vitis vinifera]	680-698	2	GO:0003700(DNA binding transcription factor activity);GO:0005634(nucleus);GO:0006351(transcription, DNA-templated);GO:0006355(regulation of transcription, DNA-templated);GO:0043565(sequence-specific DNA binding)	ko04016(MAPK signaling pathway - plant);ko04626(Plant-pathogen interaction)
ath-MIR169g-p3_2ss7AG19GA	CSS0016164.1	CSS0016164	CSS0016164	Forkhead box protein like [Actinidia chinensis var. chinensis]	124-142	2	-
ath-MIR169g-p3_2ss7AG19GA	CSS0017499.1	CSS0017499	CSS0017499	E3 ubiquitin-protein like [Actinidia chinensis var. chinensis]	152-171	2.5	GO:0043161(proteasome-mediated ubiquitin-dependent protein catabolic process);GO:0061630(ubiquitin protein ligase activity)
ath-MIR169g-p3_2ss7AG19GA	CSS0032783.1	CSS0032783	CSS0032783	lipoxygenase [Camellia sinensis]	288-306	2	GO:0016165(linoleate 13S-lipoxygenase activity)	ko00591(Linoleic acid metabolism);ko00592(alpha-Linolenic acid metabolism)
ath-MIR169g-p3_2ss7AG19GA	CSS0028606.1	CSS0028606	CSS0028606	50S ribosomal protein [Actinidia chinensis var. chinensis]	160-177	2	GO:0003735(structural constituent of ribosome);GO:0005840(ribosome);GO:0006412(translation);GO:0009507(chloroplast);GO:0009570(chloroplast stroma);GO:0009941(chloroplast envelope);GO:0016020(membrane);GO:0019843(rRNA binding)	ko03010(Ribosome)
ath-MIR169g-p3_2ss7AG19GA	CSS0030444.1	CSS0030444	CSS0030444	Transaldolase [Actinidia chinensis var. chinensis]	184-201	2	GO:0004801(sedoheptulose-7-phosphate:D-glyceraldehyde-3-phosphate glyceronetransferase activity);GO:0005739(mitochondrion);GO:0005829(cytosol);GO:0005975(carbohydrate metabolic process);GO:0006098(pentose-phosphate shunt);GO:0009507(chloroplast);GO:0009536(plastid);GO:0009570(chloroplast stroma);GO:0009809(lignin biosynthetic process);GO:0033587(shikimate biosynthetic process);GO:0046686(response…	ko00030(Pentose phosphate pathway)
ath-MIR169g-p3_2ss7AG19GA	CSS0000882.1	CSS0000882	CSS0000882	Ethylene-responsive transcription factor [Actinidia chinensis var. chinensis]	720-739	2.5	GO:0003677(DNA binding);GO:0003700(DNA binding transcription factor activity);GO:0005634(nucleus);GO:0006351(transcription, DNA-templated);GO:0006355(regulation of transcription, DNA-templated);GO:0009414(response to water deprivation);GO:0009651(response to salt stress);GO:0009723(response to ethylene);GO:0009737(response to abscisic acid);GO:0009751(response to salicylic acid);GO:0009753(respon…	ko03040(Spliceosome)
ath-MIR169g-p3_2ss7AG19GA	CSS0045312.1	CSS0045312	CSS0045312	hypothetical protein CEY00_Acc14331 [Actinidia chinensis var. chinensis]	172-189	2	GO:0003674(molecular_function);GO:0005634(nucleus);GO:0008150(biological_process)
ath-MIR169g-p3_2ss7AG19GA	CSS0015720.1	CSS0015720	CSS0015720	Polygalacturonase [Actinidia chinensis var. chinensis]	164-181	2.5	GO:0004650(polygalacturonase activity);GO:0005576(extracellular region);GO:0005773(vacuole);GO:0005975(carbohydrate metabolic process);GO:0009505(plant-type cell wall);GO:0016829(lyase activity);GO:0071555(cell wall organization)	ko00040(Pentose and glucuronate interconversions)
ath-MIR169g-p3_2ss7AG19GA	CSS0042605.1	CSS0042605	CSS0042605	uncharacterized protein LOC111309487 [Durio zibethinus]	72-89	2.5	GO:0003746(translation elongation factor activity);GO:0005634(nucleus);GO:0006414(translational elongation)
ath-MIR169g-p3_2ss7AG19GA	CSS0006896.1	CSS0006896	CSS0006896	uncharacterized protein LOC111309487 [Durio zibethinus]	72-89	2.5	GO:0003746(translation elongation factor activity);GO:0005634(nucleus);GO:0006414(translational elongation)
ath-MIR169g-p3_2ss7AG19GA	CSS0045881.1	CSS0045881	CSS0045881	copia-type reverse transcriptase-like protein [Arabidopsis thaliana]	1223-1241	2.5	GO:0003723(RNA binding);GO:0004525(ribonuclease III activity);GO:0005634(nucleus);GO:0005737(cytoplasm);GO:0016442(RISC complex);GO:0030422(production of siRNA involved in RNA interference)	ko00230(Purine metabolism);ko00240(Pyrimidine metabolism);ko03020(RNA polymerase)
ath-MIR169g-p3_2ss7AG19GA	CSS0033513.1	CSS0033513	CSS0033513	RING finger and transmembrane domain-containing protein [Actinidia chinensis var. chinensis]	15-32	2	GO:0008270(zinc ion binding);GO:0016021(integral component of membrane)
ath-MIR169g-p3_2ss7AG19GA	CSS0021566.1	CSS0021566	CSS0021566	GON-4-like protein [Actinidia chinensis var. chinensis]	139-157	2.5	GO:0003674(molecular_function);GO:0005575(cellular_component);GO:0015031(protein transport)
ath-MIR169g-p3_2ss7AG19GA	CSS0045033.1	CSS0045033	CSS0045033	F-box protein [Actinidia chinensis var. chinensis]	14-32	2.5	GO:0003674(molecular_function);GO:0005634(nucleus);GO:0008150(biological_process)
ath-MIR169g-p3_2ss7AG19GA	CSS0025258.1	CSS0025258	CSS0025258	PREDICTED: dof zinc finger protein DOF1.8-like isoform X1 [Gossypium hirsutum]	658-676	2	GO:0003677(DNA binding);GO:0003682(chromatin binding);GO:0003700(DNA binding transcription factor activity);GO:0005634(nucleus);GO:0006351(transcription, DNA-templated);GO:0006355(regulation of transcription, DNA-templated);GO:0009639(response to red or far red light);GO:0009845(seed germination);GO:0044212(transcription regulatory region DNA binding);GO:0045892(negative regulation of transcripti…
ath-MIR169g-p3_2ss7AG19GA	CSS0005668.1	CSS0005668	CSS0005668	PREDICTED: probable E3 ubiquitin-protein ligase RNF144A-B [Vitis vinifera]	202-220	2.5	GO:0000151(ubiquitin ligase complex);GO:0000209(protein polyubiquitination);GO:0005737(cytoplasm);GO:0031624(ubiquitin conjugating enzyme binding);GO:0032436(positive regulation of proteasomal ubiquitin-dependent protein catabolic process);GO:0061630(ubiquitin protein ligase activity)
ath-MIR169g-p3_2ss7AG19GA	CSS0015047.1	CSS0015047	CSS0015047	Glutamate-tRNA ligase, bacterial/mitochondrial [Trema orientale]	315-332	2	GO:0003723(RNA binding);GO:0004818(glutamate-tRNA ligase activity);GO:0005739(mitochondrion);GO:0006424(glutamyl-tRNA aminoacylation);GO:0009570(chloroplast stroma);GO:0070127(tRNA aminoacylation for mitochondrial protein translation)	ko00860(Porphyrin and chlorophyll metabolism);ko00970(Aminoacyl-tRNA biosynthesis)
ath-MIR169g-p3_2ss7AG19GA	CSS0019429.2	CSS0019429	CSS0019429	PREDICTED: calcium-dependent protein kinase 26 isoform X1 [Cucumis melo]	252-271	2.5	GO:0004683(calmodulin-dependent protein kinase activity);GO:0005516(calmodulin binding);GO:0005634(nucleus);GO:0005737(cytoplasm);GO:0005886(plasma membrane);GO:0009738(abscisic acid-activated signaling pathway);GO:0009931(calcium-dependent protein serine/threonine kinase activity);GO:0018105(peptidyl-serine phosphorylation);GO:0035556(intracellular signal transduction);GO:0046777(protein autopho…	ko04626(Plant-pathogen interaction)
ath-MIR169g-p3_2ss7AG19GA	CSS0023137.1	CSS0023137	CSS0023137	Serine/threonine-protein kinase [Actinidia chinensis var. chinensis]	78-96	1	GO:0004672(protein kinase activity);GO:0005886(plasma membrane);GO:0016301(kinase activity);GO:0016310(phosphorylation)
ath-MIR169g-p3_2ss7AG19GA	CSS0027818.1	CSS0027818	CSS0027818	hypothetical protein MIMGU_mgv1a004154mg [Erythranthe guttata]	179-197	2	-
ath-MIR169g-p3_2ss7AG19GA	CSS0031711.1	CSS0031711	CSS0031711	Transcription factor bHLH155 like [Actinidia chinensis var. chinensis]	1237-1255	1	GO:0004674(protein serine/threonine kinase activity);GO:0005829(cytosol);GO:0006468(protein phosphorylation);GO:0035556(intracellular signal transduction)
ath-MIR169g-p3_2ss7AG19GA	CSS0017478.1	CSS0017478	CSS0017478	Magnesium transporter like [Actinidia chinensis var. chinensis]	111-129	2.5	GO:0005769(early endosome);GO:0005886(plasma membrane);GO:0008150(biological_process);GO:0015095(magnesium ion transmembrane transporter activity);GO:0016021(integral component of membrane)
ath-MIR169g-p3_2ss7AG19GA	CSS0000501.1	CSS0000501	CSS0000501	Disease resistance protein [Actinidia chinensis var. chinensis]	1-18	2.5	GO:0000166(nucleotide binding);GO:0005515(protein binding);GO:0005524(ATP binding);GO:0005886(plasma membrane);GO:0006952(defense response);GO:0007165(signal transduction);GO:0009626(plant-type hypersensitive response);GO:0012505(endomembrane system);GO:0019897(extrinsic component of plasma membrane);GO:0043531(ADP binding)	ko04626(Plant-pathogen interaction)
ath-MIR169g-p3_2ss7AG19GA	CSS0041930.1	CSS0041930	CSS0041930	Purple acid phosphatase [Actinidia chinensis var. chinensis]	814-832	2.5	GO:0003993(acid phosphatase activity);GO:0005615(extracellular space);GO:0030145(manganese ion binding);GO:0046872(metal ion binding)	ko00130(Ubiquinone and other terpenoid-quinone biosynthesis)
ath-MIR169g-p3_2ss7AG19GA	CSS0021931.1	CSS0021931	CSS0021931	Ethylene-responsive transcription factor [Actinidia chinensis var. chinensis]	461-479	2.5	GO:0003677(DNA binding);GO:0003700(DNA binding transcription factor activity);GO:0005634(nucleus);GO:0006351(transcription, DNA-templated);GO:0006355(regulation of transcription, DNA-templated);GO:0009861(jasmonic acid and ethylene-dependent systemic resistance);GO:0009863(salicylic acid mediated signaling pathway);GO:0009873(ethylene-activated signaling pathway);GO:0043565(sequence-specific DNA …
ath-MIR169g-p3_2ss7AG19GA	CSS0017859.1	CSS0017859	CSS0017859	DEAD-box ATP-dependent RNA helicase [Actinidia chinensis var. chinensis]	91-110	2.5	GO:0004004(ATP-dependent RNA helicase activity);GO:0010501(RNA secondary structure unwinding)	ko03040(Spliceosome)
ath-MIR169g-p3_2ss7AG19GA	CSS0001640.1	CSS0001640	CSS0001640	pyruvate decarboxylase 2 [Diospyros kaki]	52-70	2	GO:0000287(magnesium ion binding);GO:0004737(pyruvate decarboxylase activity);GO:0005575(cellular_component);GO:0016831(carboxy-lyase activity);GO:0030976(thiamine pyrophosphate binding)	ko00010(Glycolysis / Gluconeogenesis)
ath-MIR169g-p3_2ss7AG19GA	CSS0004684.1	CSS0004684	CSS0004684	chlorophyllase-1 [Camellia sinensis]	167-184	1.5	GO:0005773(vacuole);GO:0009507(chloroplast);GO:0015996(chlorophyll catabolic process);GO:0042742(defense response to bacterium);GO:0047746(chlorophyllase activity);GO:0050832(defense response to fungus);GO:0102293(pheophytinase b activity)	ko00860(Porphyrin and chlorophyll metabolism)
ath-MIR169g-p3_2ss7AG19GA	CSS0003236.1	CSS0003236	CSS0003236	UDP-glycosyltransferase 91A5 [Camellia sinensis]	19-38	2.5	GO:0009813(flavonoid biosynthetic process);GO:0043231(intracellular membrane-bounded organelle);GO:0052696(flavonoid glucuronidation);GO:0080043(quercetin 3-O-glucosyltransferase activity);GO:0080044(quercetin 7-O-glucosyltransferase activity)
ath-MIR169g-p3_2ss7AG19GA	CSS0015083.1	CSS0015083	CSS0015083	lysM domain receptor-like kinase 3 isoform X1 [Citrus sinensis]	808-826	2	GO:0005515(protein binding);GO:0005775(vacuolar lumen);GO:0005886(plasma membrane);GO:0009609(response to symbiotic bacterium);GO:0009877(nodulation);GO:0016301(kinase activity);GO:0046777(protein autophosphorylation)	ko04626(Plant-pathogen interaction)
ath-MIR169g-p3_2ss7AG19GA	CSS0027831.1	CSS0027831	CSS0027831	unnamed protein product [Coffea canephora]	158-176	2	-
ath-MIR169g-p3_2ss7AG19GA	CSS0032886.1	CSS0032886	CSS0032886	Cysteine-rich repeat secretory protein like, partial [Actinidia chinensis var. chinensis]	1114-1131	2	GO:0003674(molecular_function);GO:0005576(extracellular region);GO:0009506(plasmodesma);GO:0010497(plasmodesmata-mediated intercellular transport);GO:0016021(integral component of membrane);GO:0046739(transport of virus in multicellular host)	ko03040(Spliceosome);ko04120(Ubiquitin mediated proteolysis)
ath-MIR169g-p3_2ss7AG19GA	CSS0017171.1	CSS0017171	CSS0017171	NA	65-83	2.5	-
ath-MIR169g-p3_2ss7AG19GA	CSS0038069.1	CSS0038069	CSS0038069	Pentatricopeptide repeat-containing protein [Actinidia chinensis var. chinensis]	112-130	2	GO:0003723(RNA binding);GO:0004519(endonuclease activity);GO:0006397(mRNA processing);GO:0008270(zinc ion binding);GO:0009451(RNA modification);GO:0009507(chloroplast);GO:0031425(chloroplast RNA processing)
ath-MIR169g-p3_2ss7AG19GA	CSS0029741.1	CSS0029741	CSS0029741	Coiled-coil domain-containing protein [Actinidia chinensis var. chinensis]	456-474	2	-
ath-MIR169g-p3_2ss7AG19GA	CSS0018346.1	CSS0018346	CSS0018346	PREDICTED: RHOMBOID-like protein 2 [Daucus carota subsp. sativus]	295-313	2.5	GO:0004252(serine-type endopeptidase activity);GO:0016485(protein processing)
ath-MIR169g-p3_2ss7AG19GA	CSS0036725.1	CSS0036725	CSS0036725	ethylene-responsive transcription factor ERF095-like [Chenopodium quinoa]	276-293	2	GO:0003677(DNA binding);GO:0003700(DNA binding transcription factor activity);GO:0005622(intracellular);GO:0005634(nucleus);GO:0006351(transcription, DNA-templated);GO:0006355(regulation of transcription, DNA-templated);GO:0009873(ethylene-activated signaling pathway)	ko04016(MAPK signaling pathway - plant);ko04075(Plant hormone signal transduction)
ath-MIR169g-p3_2ss7AG19GA	CSS0041850.1	CSS0041850	CSS0041850	ethylene-responsive transcription factor ERF095-like [Chenopodium quinoa]	276-293	2	GO:0003677(DNA binding);GO:0003700(DNA binding transcription factor activity);GO:0005622(intracellular);GO:0005634(nucleus);GO:0006351(transcription, DNA-templated);GO:0006355(regulation of transcription, DNA-templated);GO:0009873(ethylene-activated signaling pathway)	ko04016(MAPK signaling pathway - plant);ko04075(Plant hormone signal transduction)
ath-MIR169g-p3_2ss7AG19GA	CSS0016712.1	CSS0016712	CSS0016712	NAC domain-containing protein, partial [Actinidia chinensis var. chinensis]	898-916	2	GO:0000077(DNA damage checkpoint);GO:0003700(DNA binding transcription factor activity);GO:0005634(nucleus);GO:0006351(transcription, DNA-templated);GO:0006355(regulation of transcription, DNA-templated);GO:0007275(multicellular organism development);GO:0010332(response to gamma radiation);GO:0040020(regulation of meiotic nuclear division);GO:0043565(sequence-specific DNA binding)
ath-MIR169g-p3_2ss7AG19GA	CSS0048378.1	CSS0048378	CSS0048378	Protein NRT1/ PTR FAMILY 3.1 like [Actinidia chinensis var. chinensis]	377-395	2.5	GO:0005215(transporter activity);GO:0005886(plasma membrane);GO:0006857(oligopeptide transport);GO:0010336(gibberellic acid homeostasis);GO:0016020(membrane);GO:0016021(integral component of membrane);GO:0022857(transmembrane transporter activity);GO:0042128(nitrate assimilation);GO:0055085(transmembrane transport);GO:0097708(intracellular vesicle)
ath-MIR169g-p3_2ss7AG19GA	CSS0030718.1	CSS0030718	CSS0030718	Chaperonin like [Actinidia chinensis var. chinensis]	321-338	2	GO:0005576(extracellular region);GO:0005886(plasma membrane);GO:0009506(plasmodesma);GO:0016021(integral component of membrane)
ath-MIR169g-p3_2ss7AG19GA	CSS0012740.1	CSS0012740	CSS0012740	PREDICTED: protein NRT1/ PTR FAMILY 3.1 [Capsicum annuum]	334-352	2.5	GO:0005215(transporter activity);GO:0005886(plasma membrane);GO:0006857(oligopeptide transport);GO:0010336(gibberellic acid homeostasis);GO:0016020(membrane);GO:0016021(integral component of membrane);GO:0022857(transmembrane transporter activity);GO:0042128(nitrate assimilation);GO:0055085(transmembrane transport);GO:0097708(intracellular vesicle)
ath-MIR169g-p3_2ss7AG19GA	CSS0014859.1	CSS0014859	CSS0014859	BTB/POZ domain-containing protein [Actinidia chinensis var. chinensis]	308-326	1.5	GO:0005770(late endosome);GO:0005886(plasma membrane);GO:0009416(response to light stimulus);GO:0009908(flower development);GO:0009911(positive regulation of flower development);GO:0010229(inflorescence development);GO:0010540(basipetal auxin transport);GO:0016567(protein ubiquitination);GO:0045176(apical protein localization);GO:0048825(cotyledon development);GO:0048827(phyllome development);GO:…
ath-MIR169g-p3_2ss7AG19GA	CSS0001481.1	CSS0001481	CSS0001481	pentatricopeptide repeat-containing protein At1g73400, mitochondrial [Olea europaea var. sylvestris]	614-632	2	-
ath-MIR169g-p3_2ss7AG19GA	CSS0042213.1	CSS0042213	CSS0042213	Zinc transporter like [Actinidia chinensis var. chinensis]	134-152	2.5	-
ath-MIR169g-p3_2ss7AG19GA	CSS0004355.1	CSS0004355	CSS0004355	disease resistance protein At4g27190-like isoform X1 [Durio zibethinus]	2525-2543	2.5	GO:0005515(protein binding);GO:0005524(ATP binding);GO:0005886(plasma membrane);GO:0006952(defense response);GO:0007165(signal transduction);GO:0043531(ADP binding)	ko04626(Plant-pathogen interaction)
ath-MIR169g-p3_2ss7AG19GA	CSS0018044.1	CSS0018044	CSS0018044	Non-functional pseudokinase [Actinidia chinensis var. chinensis]	1175-1192	2.5	GO:0004674(protein serine/threonine kinase activity);GO:0005886(plasma membrane);GO:0007166(cell surface receptor signaling pathway)
ath-MIR169g-p3_2ss7AG19GA	CSS0039663.1	CSS0039663	CSS0039663	disease resistance protein At4g27190-like isoform X1 [Durio zibethinus]	2320-2339	2	GO:0005524(ATP binding);GO:0005739(mitochondrion);GO:0006952(defense response);GO:0043531(ADP binding)	ko04626(Plant-pathogen interaction)
ath-MIR169g-p3_2ss7AG19GA	CSS0034938.1	CSS0034938	CSS0034938	hypothetical protein DVH24_013062 [Malus domestica]	116-135	2.5	GO:0003674(molecular_function);GO:0005783(endoplasmic reticulum);GO:0005789(endoplasmic reticulum membrane);GO:0009705(plant-type vacuole membrane);GO:0009838(abscission);GO:0010256(endomembrane system organization);GO:0016021(integral component of membrane)
ath-MIR169g-p3_2ss7AG19GA	CSS0000726.1	CSS0000726	CSS0000726	Thermospermine synthase [Actinidia chinensis var. chinensis]	244-262	2.5	GO:0005737(cytoplasm);GO:0006596(polyamine biosynthetic process);GO:0010487(thermospermine synthase activity)
ath-MIR169g-p3_2ss7AG19GA	CSS0010587.1	CSS0010587	CSS0010587	DNA gyrase subunit B like [Actinidia chinensis var. chinensis]	2528-2546	2	GO:0003918(DNA topoisomerase type II (ATP-hydrolyzing) activity);GO:0006265(DNA topological change);GO:0006268(DNA unwinding involved in DNA replication);GO:0007059(chromosome segregation);GO:0009295(nucleoid);GO:0009330(DNA topoisomerase complex (ATP-hydrolyzing))
ath-MIR169g-p3_2ss7AG19GA	CSS0012849.1	CSS0012849	CSS0012849	RNA polymerase II C-terminal domain phosphatase-like [Actinidia chinensis var. chinensis]	368-385	2	GO:0008420(CTD phosphatase activity);GO:0016591(DNA-directed RNA polymerase II, holoenzyme);GO:0070940(dephosphorylation of RNA polymerase II C-terminal domain)
ath-MIR169g-p3_2ss7AG19GA	CSS0012849.1	CSS0012849	CSS0012849	RNA polymerase II C-terminal domain phosphatase-like [Actinidia chinensis var. chinensis]	335-353	2	GO:0008420(CTD phosphatase activity);GO:0016591(DNA-directed RNA polymerase II, holoenzyme);GO:0070940(dephosphorylation of RNA polymerase II C-terminal domain)
ath-MIR169g-p3_2ss7AG19GA	CSS0015369.1	CSS0015369	CSS0015369	Protein lingerer like [Actinidia chinensis var. chinensis]	2-20	2.5	-
ath-MIR169g-p3_2ss7AG19GA	CSS0001222.1	CSS0001222	CSS0001222	hypothetical protein CEY00_Acc23765 [Actinidia chinensis var. chinensis]	91-108	2.5	GO:0003674(molecular_function);GO:0005634(nucleus);GO:0008150(biological_process)
ath-MIR169g-p3_2ss7AG19GA	CSS0035060.1	CSS0035060	CSS0035060	Retrovirus-related Pol polyprotein from transposon RE1 [Vitis vinifera]	529-547	2.5	-
ath-MIR169g-p3_2ss7AG19GA	CSS0043162.1	CSS0043162	CSS0043162	NA	120-138	2.5	-
ath-MIR169g-p3_2ss7AG19GA	CSS0030677.1	CSS0030677	CSS0030677	Rust resistance kinase Lr10 [Vitis vinifera]	87-105	2.5	GO:0005886(plasma membrane)
ath-MIR169g-p3_2ss7AG19GA	CSS0024110.1	CSS0024110	CSS0024110	GTP-binding protein like [Actinidia chinensis var. chinensis]	107-125	2.5	GO:0005525(GTP binding);GO:0005783(endoplasmic reticulum);GO:0005794(Golgi apparatus);GO:0005829(cytosol);GO:0005886(plasma membrane);GO:0006886(intracellular protein transport);GO:0016192(vesicle-mediated transport)	ko04141(Protein processing in endoplasmic reticulum)
ath-MIR169g-p3_2ss7AG19GA	CSS0031999.1	CSS0031999	CSS0031999	indole-3-pyruvate monooxygenase YUCCA6-like [Manihot esculenta]	37-55	2	GO:0004497(monooxygenase activity);GO:0055114(oxidation-reduction process)	ko00380(Tryptophan metabolism)
ath-MIR169g-p3_2ss7AG19GA	CSS0040195.1	CSS0040195	CSS0040195	Rhomboid-like protein [Actinidia chinensis var. chinensis]	19-36	2	GO:0004252(serine-type endopeptidase activity);GO:0016485(protein processing)
ath-MIR169g-p3_2ss7AG19GA	CSS0022045.1	CSS0022045	CSS0022045	probable disease resistance protein At4g27220 [Quercus suber]	1952-1970	2	GO:0000166(nucleotide binding);GO:0005515(protein binding);GO:0005524(ATP binding);GO:0005622(intracellular);GO:0005886(plasma membrane);GO:0006952(defense response);GO:0008219(cell death);GO:0009626(plant-type hypersensitive response);GO:0009816(defense response to bacterium, incompatible interaction);GO:0038023(signaling receptor activity);GO:0042802(identical protein binding);GO:0043531(ADP bi…	ko04626(Plant-pathogen interaction)
ath-MIR169g-p3_2ss7AG19GA	CSS0018670.1	CSS0018670	CSS0018670	cyclin dependent kinase A [Camellia sinensis]	175-193	2.5	GO:0000226(microtubule cytoskeleton organization);GO:0000911(cytokinesis by cell plate formation);GO:0004672(protein kinase activity);GO:0004693(cyclin-dependent protein serine/threonine kinase activity);GO:0005515(protein binding);GO:0005524(ATP binding);GO:0005634(nucleus);GO:0005737(cytoplasm);GO:0005829(cytosol);GO:0005886(plasma membrane);GO:0006281(DNA repair);GO:0007346(regulation of mitot…
ath-MIR169g-p3_2ss7AG19GA	CSS0024882.1	CSS0024882	CSS0024882	Partner of Y14 and mago like [Actinidia chinensis var. chinensis]	175-194	2	GO:0005737(cytoplasm)	ko03013(RNA transport);ko03015(mRNA surveillance pathway)
ath-MIR169g-p3_2ss7AG19GA	CSS0019399.1	CSS0019399	CSS0019399	trihelix transcription factor PTL-like [Hevea brasiliensis]	150-169	2	GO:0003677(DNA binding);GO:0003700(DNA binding transcription factor activity);GO:0005634(nucleus);GO:0006351(transcription, DNA-templated);GO:0006355(regulation of transcription, DNA-templated);GO:0009909(regulation of flower development);GO:0010200(response to chitin);GO:0042803(protein homodimerization activity);GO:0046621(negative regulation of organ growth);GO:0048441(petal development);GO:00…	ko00040(Pentose and glucuronate interconversions)
ath-MIR169g-p3_2ss7AG19GA	CSS0011019.1	CSS0011019	CSS0011019	Jasmonate-zim-domain protein 12, putative isoform 1 [Theobroma cacao]	651-670	2	GO:0003714(transcription corepressor activity);GO:0005634(nucleus);GO:0009611(response to wounding);GO:0031347(regulation of defense response);GO:1903507(negative regulation of nucleic acid-templated transcription);GO:2000022(regulation of jasmonic acid mediated signaling pathway)	ko04075(Plant hormone signal transduction)
ath-MIR169g-p3_2ss7AG19GA	CSS0023603.1	CSS0023603	CSS0023603	uncharacterized protein LOC113863724 isoform X1 [Abrus precatorius]	119-137	2.5	GO:0004386(helicase activity);GO:0005634(nucleus);GO:0008150(biological_process)
ath-MIR169g-p3_2ss7AG19GA	CSS0048086.1	CSS0048086	CSS0048086	PREDICTED: uncharacterized protein LOC104242954 [Nicotiana sylvestris]	427-445	2.5	GO:0004386(helicase activity);GO:0005634(nucleus);GO:0008150(biological_process)
ath-MIR169g-p3_2ss7AG19GA	CSS0048086.1	CSS0048086	CSS0048086	PREDICTED: uncharacterized protein LOC104242954 [Nicotiana sylvestris]	113-131	2	GO:0004386(helicase activity);GO:0005634(nucleus);GO:0008150(biological_process)
ath-MIR169g-p3_2ss7AG19GA	CSS0016693.1	CSS0016693	CSS0016693	TVP38/TMEM64 family membrane protein like [Actinidia chinensis var. chinensis]	48-66	2	GO:0003674(molecular_function);GO:0005886(plasma membrane);GO:0008150(biological_process);GO:0016021(integral component of membrane)
ath-MIR169g-p3_2ss7AG19GA	CSS0027931.1	CSS0027931	CSS0027931	PREDICTED: flap endonuclease 1 isoform X1 [Vitis vinifera]	1454-1473	2	GO:0003677(DNA binding);GO:0004518(nuclease activity);GO:0004519(endonuclease activity);GO:0004527(exonuclease activity);GO:0005634(nucleus);GO:0005654(nucleoplasm);GO:0005730(nucleolus);GO:0005739(mitochondrion);GO:0005829(cytosol);GO:0006260(DNA replication);GO:0006281(DNA repair);GO:0009411(response to UV);GO:0046872(metal ion binding);GO:0048256(flap endonuclease activity)	ko03030(DNA replication);ko03410(Base excision repair);ko03450(Non-homologous end-joining)
ath-MIR169g-p3_2ss7AG19GA	CSS0005423.1	CSS0005423	CSS0005423	Disease resistance protein [Actinidia chinensis var. chinensis]	255-274	2	GO:0000166(nucleotide binding);GO:0005515(protein binding);GO:0005524(ATP binding);GO:0005886(plasma membrane);GO:0006952(defense response);GO:0007165(signal transduction);GO:0009626(plant-type hypersensitive response);GO:0012505(endomembrane system);GO:0019897(extrinsic component of plasma membrane);GO:0043531(ADP binding)	ko04626(Plant-pathogen interaction)
ath-MIR169g-p3_2ss7AG19GA	CSS0019751.1	CSS0019751	CSS0019751	Disease resistance protein [Actinidia chinensis var. chinensis]	255-274	2	GO:0005524(ATP binding);GO:0005886(plasma membrane);GO:0006952(defense response);GO:0043531(ADP binding)	ko04626(Plant-pathogen interaction)
ath-MIR169g-p3_2ss7AG19GA	CSS0024495.1	CSS0024495	CSS0024495	Leucine-rich repeat receptor-like protein kinase precursor [Actinidia chinensis var. chinensis]	2786-2804	1.5	GO:0004674(protein serine/threonine kinase activity);GO:0005515(protein binding);GO:0005524(ATP binding);GO:0005634(nucleus);GO:0005886(plasma membrane);GO:0006468(protein phosphorylation);GO:0009506(plasmodesma);GO:0009755(hormone-mediated signaling pathway);GO:0010183(pollen tube guidance);GO:0016020(membrane);GO:0016021(integral component of membrane);GO:0016301(kinase activity);GO:0090406(pol…
ath-MIR169g-p3_2ss7AG19GA	CSS0000396.1	CSS0000396	CSS0000396	Octicosapeptide/Phox/Bem1p family protein isoform 1 [Theobroma cacao]	484-502	2	GO:0003674(molecular_function);GO:0005634(nucleus);GO:0008150(biological_process)
ath-MIR169g-p3_2ss7AG19GA	CSS0046330.1	CSS0046330	CSS0046330	Stabilin-1 like [Actinidia chinensis var. chinensis]	13-31	1	GO:0006508(proteolysis);GO:0008233(peptidase activity);GO:0009507(chloroplast);GO:0016021(integral component of membrane)	ko00970(Aminoacyl-tRNA biosynthesis)
ath-MIR169g-p3_2ss7AG19GA	CSS0007199.1	CSS0007199	CSS0007199	F-actin-capping protein subunit alpha like [Actinidia chinensis var. chinensis]	82-99	1.5	GO:0003779(actin binding);GO:0005634(nucleus);GO:0005737(cytoplasm);GO:0007015(actin filament organization);GO:0008290(F-actin capping protein complex);GO:0030036(actin cytoskeleton organization);GO:0051016(barbed-end actin filament capping);GO:0051693(actin filament capping)	ko04144(Endocytosis)
ath-MIR169g-p3_2ss7AG19GA	CSS0005244.1	CSS0005244	CSS0005244	Golgi apparatus membrane protein [Actinidia chinensis var. chinensis]	135-152	2	GO:0009507(chloroplast);GO:0009706(chloroplast inner membrane);GO:0009941(chloroplast envelope);GO:0016021(integral component of membrane)
ath-MIR169g-p3_2ss7AG19GA	CSS0025346.1	CSS0025346	CSS0025346	hypothetical protein CEY00_Acc11078 [Actinidia chinensis var. chinensis]	196-214	2.5	GO:0000326(protein storage vacuole);GO:0005515(protein binding);GO:0005783(endoplasmic reticulum);GO:0005789(endoplasmic reticulum membrane);GO:0005886(plasma membrane);GO:0006623(protein targeting to vacuole);GO:0016021(integral component of membrane);GO:0032586(protein storage vacuole membrane)	ko00230(Purine metabolism);ko00240(Pyrimidine metabolism);ko03020(RNA polymerase)
ath-MIR169g-p3_2ss7AG19GA	CSS0050321.1	CSS0050321	CSS0050321	PREDICTED: protein indeterminate-domain 2-like [Nicotiana tomentosiformis]	1500-1518	2	GO:0003676(nucleic acid binding);GO:0003700(DNA binding transcription factor activity);GO:0005515(protein binding);GO:0005634(nucleus);GO:0006351(transcription, DNA-templated);GO:0006355(regulation of transcription, DNA-templated);GO:0008270(zinc ion binding);GO:0008356(asymmetric cell division);GO:0044212(transcription regulatory region DNA binding);GO:0046872(metal ion binding);GO:0048364(root …	ko00052(Galactose metabolism);ko00600(Sphingolipid metabolism);ko00531(Glycosaminoglycan degradation);ko00604(Glycosphingolipid biosynthesis - ganglio series);ko00511(Other glycan degradation)
ath-MIR169g-p3_2ss7AG19GA	CSS0009867.1	CSS0009867	CSS0009867	Transcription factor bHLH155 like [Actinidia chinensis var. chinensis]	1129-1147	2.5	GO:0004674(protein serine/threonine kinase activity);GO:0005829(cytosol);GO:0006468(protein phosphorylation);GO:0035556(intracellular signal transduction)
ath-MIR169g-p3_2ss7AG19GA	CSS0032780.1	CSS0032780	CSS0032780	Polygalacturonase [Actinidia chinensis var. chinensis]	54-71	2	GO:0004650(polygalacturonase activity);GO:0005576(extracellular region);GO:0005975(carbohydrate metabolic process)	ko00040(Pentose and glucuronate interconversions)
ath-MIR169g-p3_2ss7AG19GA	CSS0017338.1	CSS0017338	CSS0017338	transcription factor TCP2 [Camellia sinensis]	1073-1091	2.5	GO:0003677(DNA binding);GO:0003700(DNA binding transcription factor activity);GO:0005515(protein binding);GO:0005634(nucleus);GO:0006351(transcription, DNA-templated);GO:0006355(regulation of transcription, DNA-templated);GO:0009637(response to blue light);GO:0009965(leaf morphogenesis);GO:0030154(cell differentiation);GO:0045962(positive regulation of development, heterochronic);GO:0048366(leaf …
ath-MIR169g-p3_2ss7AG19GA	CSS0046376.1	CSS0046376	CSS0046376	Isocitrate dehydrogenase [NAD] regulatory subunit 1 like [Actinidia chinensis var. chinensis]	44-62	2.5	GO:0004449(isocitrate dehydrogenase (NAD+) activity);GO:0005739(mitochondrion);GO:0006099(tricarboxylic acid cycle);GO:0006102(isocitrate metabolic process);GO:0008270(zinc ion binding)	ko00020(Citrate cycle (TCA cycle))
ath-MIR169g-p3_2ss7AG19GA	CSS0020108.1	CSS0020108	CSS0020108	Trihelix transcription factor GT-3b like [Actinidia chinensis var. chinensis]	406-424	2	GO:0003700(DNA binding transcription factor activity);GO:0005515(protein binding);GO:0005634(nucleus);GO:0006351(transcription, DNA-templated);GO:0006355(regulation of transcription, DNA-templated);GO:0042802(identical protein binding);GO:0043565(sequence-specific DNA binding)
ath-MIR169g-p3_2ss7AG19GA	CSS0011567.1	CSS0011567	CSS0011567	Methylsterol monooxygenase [Actinidia chinensis var. chinensis]	709-727	2.5	GO:0000254(C-4 methylsterol oxidase activity);GO:0003824(catalytic activity);GO:0005506(iron ion binding);GO:0005789(endoplasmic reticulum membrane);GO:0016021(integral component of membrane);GO:0016126(sterol biosynthetic process);GO:0080064(4,4-dimethyl-9beta,19-cyclopropylsterol oxidation)	ko00100(Steroid biosynthesis)
ath-MIR169g-p3_2ss7AG19GA	CSS0037160.1	CSS0037160	CSS0037160	WRKY transcription factor 33 [Actinidia chinensis var. chinensis]	201-218	2	GO:0003700(DNA binding transcription factor activity);GO:0005515(protein binding);GO:0005634(nucleus);GO:0006351(transcription, DNA-templated);GO:0006355(regulation of transcription, DNA-templated);GO:0006970(response to osmotic stress);GO:0009408(response to heat);GO:0009409(response to cold);GO:0009414(response to water deprivation);GO:0009651(response to salt stress);GO:0010120(camalexin biosy…	ko04016(MAPK signaling pathway - plant);ko04626(Plant-pathogen interaction)
ath-MIR169g-p3_2ss7AG19GA	CSS0037160.1	CSS0037160	CSS0037160	WRKY transcription factor 33 [Actinidia chinensis var. chinensis]	115-133	2	GO:0003700(DNA binding transcription factor activity);GO:0005515(protein binding);GO:0005634(nucleus);GO:0006351(transcription, DNA-templated);GO:0006355(regulation of transcription, DNA-templated);GO:0006970(response to osmotic stress);GO:0009408(response to heat);GO:0009409(response to cold);GO:0009414(response to water deprivation);GO:0009651(response to salt stress);GO:0010120(camalexin biosy…	ko04016(MAPK signaling pathway - plant);ko04626(Plant-pathogen interaction)
ath-MIR169g-p3_2ss7AG19GA	CSS0039997.1	CSS0039997	CSS0039997	CBL-interacting serine/threonine-protein kinase [Actinidia chinensis var. chinensis]	113-130	2	GO:0004674(protein serine/threonine kinase activity);GO:0005515(protein binding);GO:0005524(ATP binding);GO:0005634(nucleus);GO:0005773(vacuole);GO:0005886(plasma membrane);GO:0009506(plasmodesma);GO:0016301(kinase activity);GO:0018105(peptidyl-serine phosphorylation);GO:0018107(peptidyl-threonine phosphorylation);GO:0035556(intracellular signal transduction)
ath-MIR169g-p3_2ss7AG19GA	CSS0003078.1	CSS0003078	CSS0003078	RHOMBOID-like protein [Actinidia chinensis var. chinensis]	873-891	2.5	GO:0004252(serine-type endopeptidase activity);GO:0016485(protein processing)	ko00510(N-Glycan biosynthesis)
ath-MIR169g-p3_2ss7AG19GA	CSS0019130.1	CSS0019130	CSS0019130	L10-interacting MYB domain-containing protein [Actinidia chinensis var. chinensis]	1578-1596	2.5	GO:0003674(molecular_function);GO:0005634(nucleus);GO:0031347(regulation of defense response)
ath-MIR169g-p3_2ss7AG19GA	CSS0033465.1	CSS0033465	CSS0033465	Phospholipase A I like [Actinidia chinensis var. chinensis]	228-245	2	GO:0004620(phospholipase activity);GO:0005634(nucleus);GO:0009620(response to fungus);GO:0009695(jasmonic acid biosynthetic process);GO:0047714(galactolipase activity)
ath-MIR169g-p3_2ss7AG19GA	CSS0023418.1	CSS0023418	CSS0023418	PREDICTED: transcription factor bHLH112 isoform X1 [Vitis vinifera]	337-355	2	GO:0001046(core promoter sequence-specific DNA binding);GO:0001228(transcriptional activator activity, RNA polymerase II transcription regulatory region sequence-specific DNA binding);GO:0005634(nucleus);GO:0006366(transcription by RNA polymerase II)
ath-MIR169g-p3_2ss7AG19GA	CSS0018081.1	CSS0018081	CSS0018081	Calcium-transporting ATPase [Actinidia chinensis var. chinensis]	271-288	2.5	GO:0005388(calcium-transporting ATPase activity);GO:0005887(integral component of plasma membrane);GO:0043231(intracellular membrane-bounded organelle)
ath-MIR169g-p3_2ss7AG19GA	CSS0042206.1	CSS0042206	CSS0042206	DET1- and DDB1-associated protein [Actinidia chinensis var. chinensis]	613-630	2	GO:0005515(protein binding);GO:0005634(nucleus);GO:0009788(negative regulation of abscisic acid-activated signaling pathway);GO:0016874(ligase activity);GO:0032434(regulation of proteasomal ubiquitin-dependent protein catabolic process);GO:0032436(positive regulation of proteasomal ubiquitin-dependent protein catabolic process)
ath-MIR169g-p3_2ss7AG19GA	CSS0019969.1	CSS0019969	CSS0019969	Golgi apparatus membrane protein [Actinidia chinensis var. chinensis]	183-200	2	GO:0009507(chloroplast);GO:0009706(chloroplast inner membrane);GO:0009941(chloroplast envelope);GO:0016021(integral component of membrane)
ath-MIR169g-p3_2ss7AG19GA	CSS0000699.1	CSS0000699	CSS0000699	Golgi apparatus membrane protein [Actinidia chinensis var. chinensis]	176-193	2	GO:0009507(chloroplast);GO:0009706(chloroplast inner membrane);GO:0009941(chloroplast envelope);GO:0016021(integral component of membrane)
ath-MIR169g-p3_2ss7AG19GA	CSS0027617.1	CSS0027617	CSS0027617	unnamed protein product, partial [Vitis vinifera]	235-253	2.5	GO:0004561(alpha-N-acetylglucosaminidase activity);GO:0005773(vacuole);GO:0008152(metabolic process);GO:0009507(chloroplast);GO:0009793(embryo development ending in seed dormancy);GO:0051781(positive regulation of cell division)	ko00531(Glycosaminoglycan degradation)
ath-MIR169g-p3_2ss7AG19GA	CSS0001598.1	CSS0001598	CSS0001598	Protein FAM216B like [Actinidia chinensis var. chinensis]	35-53	2	-
ath-MIR169g-p3_2ss7AG19GA	CSS0044125.1	CSS0044125	CSS0044125	peptidyl-prolyl cis-trans isomerase FKBP17-1, chloroplastic-like isoform X3 [Coffea arabica]	94-113	2.5	GO:0003755(peptidyl-prolyl cis-trans isomerase activity);GO:0005528(FK506 binding);GO:0005789(endoplasmic reticulum membrane);GO:0061077(chaperone-mediated protein folding)
ath-MIR169g-p3_2ss7AG19GA	CSS0027990.1	CSS0027990	CSS0027990	BZIP transcription factor family protein [Theobroma cacao]	186-204	2.5	GO:0005515(protein binding)	ko04075(Plant hormone signal transduction)
ath-MIR169g-p3_2ss7AG19GA	CSS0048802.1	CSS0048802	CSS0048802	F-box/LRR-repeat protein [Actinidia chinensis var. chinensis]	185-202	2.5	-
ath-MIR169g-p3_2ss7AG19GA	CSS0011778.1	CSS0011778	CSS0011778	Protein kinase [Actinidia chinensis var. chinensis]	10-28	2	GO:0000245(spliceosomal complex assembly);GO:0004672(protein kinase activity);GO:0004674(protein serine/threonine kinase activity);GO:0005634(nucleus);GO:0005737(cytoplasm);GO:0006468(protein phosphorylation);GO:0006979(response to oxidative stress);GO:0016301(kinase activity);GO:0035556(intracellular signal transduction);GO:0050684(regulation of mRNA processing)
ath-MIR169g-p3_2ss7AG19GA	CSS0018134.1	CSS0018134	CSS0018134	acyl transferase 4 [Populus trichocarpa]	288-306	1.5	GO:0005737(cytoplasm);GO:0016740(transferase activity)
ath-MIR169g-p3_2ss7AG19GA	CSS0023211.1	CSS0023211	CSS0023211	WRKY transcription factor 23 [Camellia sinensis]	905-923	2.5	GO:0003700(DNA binding transcription factor activity);GO:0005634(nucleus);GO:0006351(transcription, DNA-templated);GO:0006355(regulation of transcription, DNA-templated);GO:0009624(response to nematode);GO:0009733(response to auxin);GO:0043565(sequence-specific DNA binding)	ko04016(MAPK signaling pathway - plant);ko04626(Plant-pathogen interaction)
ath-MIR169g-p3_2ss7AG19GA	CSS0047635.1	CSS0047635	CSS0047635	Leukocyte receptor cluster member like [Actinidia chinensis var. chinensis]	225-242	2.5	GO:0003674(molecular_function);GO:0008150(biological_process);GO:0009507(chloroplast)
ath-MIR169g-p3_2ss7AG19GA	CSS0005629.1	CSS0005629	CSS0005629	Leukocyte receptor cluster member like [Actinidia chinensis var. chinensis]	202-219	2	GO:0003674(molecular_function);GO:0008150(biological_process);GO:0009507(chloroplast)
ath-MIR169g-p3_2ss7AG19GA	CSS0025557.1	CSS0025557	CSS0025557	Acylamino-acid-releasing enzyme like [Actinidia chinensis var. chinensis]	75-92	2	GO:0005634(nucleus);GO:0005737(cytoplasm);GO:0005773(vacuole);GO:0005829(cytosol);GO:0006508(proteolysis);GO:0009507(chloroplast);GO:0051289(protein homotetramerization);GO:0070009(serine-type aminopeptidase activity)
ath-MIR169g-p3_2ss7AG19GA	CSS0033373.1	CSS0033373	CSS0033373	Nudix hydrolase [Actinidia chinensis var. chinensis]	158-176	2	GO:0044715(8-oxo-dGDP phosphatase activity)
ath-MIR169g-p3_2ss7AG19GA	CSS0027452.1	CSS0027452	CSS0027452	VIN3-like protein [Actinidia chinensis var. chinensis]	2410-2427	2.5	GO:0005515(protein binding);GO:0005634(nucleus);GO:0005677(chromatin silencing complex);GO:0006351(transcription, DNA-templated);GO:0006355(regulation of transcription, DNA-templated);GO:0009409(response to cold);GO:0009908(flower development);GO:0009909(regulation of flower development);GO:0010048(vernalization response);GO:0016571(histone methylation);GO:0016607(nuclear speck);GO:0031062(positi…
ath-MIR169g-p3_2ss7AG19GA	CSS0040389.1	CSS0040389	CSS0040389	Hypothetical protein [Arabidopsis thaliana]	1350-1367	2.5	GO:0004596(peptide alpha-N-acetyltransferase activity);GO:0005737(cytoplasm);GO:0017196(N-terminal peptidyl-methionine acetylation)	ko00230(Purine metabolism);ko00240(Pyrimidine metabolism);ko03020(RNA polymerase)
ath-MIR169g-p3_2ss7AG19GA	CSS0037069.1	CSS0037069	CSS0037069	Serine/threonine protein like [Actinidia chinensis var. chinensis]	1-18	2.5	GO:0000159(protein phosphatase type 2A complex);GO:0005737(cytoplasm);GO:0007165(signal transduction);GO:0019888(protein phosphatase regulator activity)	ko03015(mRNA surveillance pathway)
ath-MIR169g-p3_2ss7AG19GA	CSS0019726.1	CSS0019726	CSS0019726	PREDICTED: peptidyl-prolyl cis-trans isomerase FKBP17-1, chloroplastic-like isoform X2 [Nicotiana tabacum]	94-113	2.5	GO:0003755(peptidyl-prolyl cis-trans isomerase activity);GO:0005528(FK506 binding);GO:0005789(endoplasmic reticulum membrane);GO:0061077(chaperone-mediated protein folding)
ath-MIR169g-p3_2ss7AG19GA	CSS0035634.1	CSS0035634	CSS0035634	PREDICTED: uncharacterized protein LOC100268160 [Vitis vinifera]	9-26	2.5	GO:0005739(mitochondrion);GO:0008150(biological_process)
ath-MIR169g-p3_2ss7AG19GA	CSS0044946.1	CSS0044946	CSS0044946	Peptide chain release factor 1 like [Actinidia chinensis var. chinensis]	633-650	2	-
ath-MIR169g-p3_2ss7AG19GA	CSS0009761.1	CSS0009761	CSS0009761	Gamma-tubulin complex component like [Actinidia chinensis var. chinensis]	65-83	2.5	GO:0000923(equatorial microtubule organizing center);GO:0000930(gamma-tubulin complex);GO:0005200(structural constituent of cytoskeleton);GO:0005813(centrosome);GO:0005816(spindle pole body);GO:0031122(cytoplasmic microtubule organization);GO:0043015(gamma-tubulin binding);GO:0051011(microtubule minus-end binding);GO:0051298(centrosome duplication);GO:0051415(microtubule nucleation by interphase …
ath-MIR169g-p3_2ss7AG19GA	CSS0006575.1	CSS0006575	CSS0006575	putative lipid-binding protein At4g00165 [Rosa chinensis]	40-58	2	GO:0005576(extracellular region);GO:0006869(lipid transport);GO:0008289(lipid binding)
ath-MIR169g-p3_2ss7AG19GA	CSS0014881.1	CSS0014881	CSS0014881	putative lipid-binding protein At4g00165 [Rosa chinensis]	33-51	2	GO:0005576(extracellular region);GO:0006869(lipid transport);GO:0008289(lipid binding)
ath-MIR169g-p3_2ss7AG19GA	CSS0005935.1	CSS0005935	CSS0005935	CTP synthase [Actinidia chinensis var. chinensis]	233-251	2.5	GO:0003883(CTP synthase activity);GO:0005524(ATP binding);GO:0005737(cytoplasm);GO:0005829(cytosol);GO:0009793(embryo development ending in seed dormancy);GO:0044210('de novo' CTP biosynthetic process);GO:0046686(response to cadmium ion)	ko00240(Pyrimidine metabolism)
ath-MIR169g-p3_2ss7AG19GA	CSS0018404.1	CSS0018404	CSS0018404	Dicarboxylate transporter 1 like [Actinidia chinensis var. chinensis]	122-141	2	GO:0015131(oxaloacetate transmembrane transporter activity);GO:0015140(malate transmembrane transporter activity);GO:0016021(integral component of membrane);GO:0071423(malate transmembrane transport)
ath-MIR169g-p3_2ss7AG19GA	CSS0014963.1	CSS0014963	CSS0014963	Hypothetical protein [Arabidopsis thaliana]	1340-1358	2.5	GO:0004832(valine-tRNA ligase activity);GO:0005829(cytosol);GO:0006438(valyl-tRNA aminoacylation)	ko00230(Purine metabolism);ko00240(Pyrimidine metabolism);ko03020(RNA polymerase)
ath-MIR169g-p3_2ss7AG19GA	CSS0030604.1	CSS0030604	CSS0030604	Transcription factor bHLH130 like [Actinidia chinensis var. chinensis]	435-453	2	GO:0001046(core promoter sequence-specific DNA binding);GO:0001228(transcriptional activator activity, RNA polymerase II transcription regulatory region sequence-specific DNA binding);GO:0005634(nucleus);GO:0006366(transcription by RNA polymerase II)	ko04075(Plant hormone signal transduction);ko04712(Circadian rhythm - plant)
ath-MIR169g-p3_2ss7AG19GA	CSS0003444.1	CSS0003444	CSS0003444	PREDICTED: O-glucosyltransferase rumi homolog [Vitis vinifera]	26-44	2.5	GO:0006664(glycolipid metabolic process);GO:0012505(endomembrane system);GO:0046527(glucosyltransferase activity)	ko00514(Other types of O-glycan biosynthesis)
ath-MIR169g-p3_2ss7AG19GA	CSS0007810.1	CSS0007810	CSS0007810	GTP diphosphokinase [Actinidia chinensis var. chinensis]	142-160	2.5	GO:0008728(GTP diphosphokinase activity);GO:0008893(guanosine-3',5'-bis(diphosphate) 3'-diphosphatase activity);GO:0009507(chloroplast);GO:0015969(guanosine tetraphosphate metabolic process);GO:0042594(response to starvation)
ath-MIR169g-p3_2ss7AG19GA	CSS0003530.1	CSS0003530	CSS0003530	Ethylene-responsive transcription factor [Actinidia chinensis var. chinensis]	679-698	2.5	GO:0003677(DNA binding);GO:0003700(DNA binding transcription factor activity);GO:0005515(protein binding);GO:0005634(nucleus);GO:0006351(transcription, DNA-templated);GO:0006355(regulation of transcription, DNA-templated);GO:0007275(multicellular organism development);GO:0009873(ethylene-activated signaling pathway);GO:0043565(sequence-specific DNA binding);GO:0050832(defense response to fungus)	ko03040(Spliceosome)
ath-MIR169g-p3_2ss7AG19GA	CSS0033972.1	CSS0033972	CSS0033972	U-box domain-containing protein [Actinidia chinensis var. chinensis]	974-992	2	GO:0005634(nucleus);GO:0005737(cytoplasm)	ko04075(Plant hormone signal transduction)
ath-MIR169g-p3_2ss7AG19GA	CSS0040701.1	CSS0040701	CSS0040701	Hypothetical protein [Arabidopsis thaliana]	1358-1376	2.5	GO:0005739(mitochondrion)	ko00230(Purine metabolism);ko00240(Pyrimidine metabolism);ko03020(RNA polymerase)
ath-MIR169g-p3_2ss7AG19GA	CSS0046245.1	CSS0046245	CSS0046245	PREDICTED: structure-specific endonuclease subunit SLX1 [Nelumbo nucifera]	245-264	2	GO:0004518(nuclease activity);GO:0005622(intracellular);GO:0005634(nucleus);GO:0006281(DNA repair)
ath-MIR169g-p3_2ss7AG19GA	CSS0009873.1	CSS0009873	CSS0009873	Inactive purple acid phosphatase 27 precursor [Actinidia chinensis var. chinensis]	87-104	2	GO:0003993(acid phosphatase activity);GO:0004722(protein serine/threonine phosphatase activity);GO:0005576(extracellular region);GO:0016311(dephosphorylation);GO:0046872(metal ion binding)
ath-MIR169g-p3_2ss7AG19GA	CSS0012429.1	CSS0012429	CSS0012429	protein SUPPRESSOR OF K(+) TRANSPORT GROWTH DEFECT 1 isoform X1 [Olea europaea var. sylvestris]	258-276	2.5	GO:0005634(nucleus);GO:0007033(vacuole organization);GO:0008568(microtubule-severing ATPase activity);GO:0031122(cytoplasmic microtubule organization)	ko04144(Endocytosis)
ath-MIR169g-p3_2ss7AG19GA	CSS0001566.1	CSS0001566	CSS0001566	gibberellin 2-oxidase 4 [Camellia sinensis]	446-464	2.5	GO:0009416(response to light stimulus);GO:0045487(gibberellin catabolic process);GO:0052634(C-19 gibberellin 2-beta-dioxygenase activity)	ko00904(Diterpenoid biosynthesis)
ath-MIR169g-p3_2ss7AG19GA	CSS0029248.1	CSS0029248	CSS0029248	ORMDL protein [Actinidia chinensis var. chinensis]	88-106	2.5	GO:0005515(protein binding);GO:0005739(mitochondrion);GO:0005783(endoplasmic reticulum);GO:0006457(protein folding);GO:0006979(response to oxidative stress);GO:0010150(leaf senescence);GO:0016021(integral component of membrane);GO:0030148(sphingolipid biosynthetic process);GO:0034976(response to endoplasmic reticulum stress);GO:0035339(SPOTS complex);GO:0042742(defense response to bacterium);GO:0…
ath-MIR169g-p3_2ss7AG19GA	CSS0050449.1	CSS0050449	CSS0050449	GATA transcription factor [Actinidia chinensis var. chinensis]	355-374	2.5	GO:0000977(RNA polymerase II regulatory region sequence-specific DNA binding);GO:0001085(RNA polymerase II transcription factor binding);GO:0001228(transcriptional activator activity, RNA polymerase II transcription regulatory region sequence-specific DNA binding);GO:0003682(chromatin binding);GO:0005634(nucleus);GO:0005667(transcription factor complex);GO:0030154(cell differentiation)
ath-MIR169g-p3_2ss7AG19GA	CSS0037100.1	CSS0037100	CSS0037100	GATA transcription factor [Actinidia chinensis var. chinensis]	364-383	2.5	GO:0000977(RNA polymerase II regulatory region sequence-specific DNA binding);GO:0001085(RNA polymerase II transcription factor binding);GO:0001228(transcriptional activator activity, RNA polymerase II transcription regulatory region sequence-specific DNA binding);GO:0003682(chromatin binding);GO:0005634(nucleus);GO:0005667(transcription factor complex);GO:0030154(cell differentiation)
ath-MIR169g-p3_2ss7AG19GA	CSS0033817.1	CSS0033817	CSS0033817	disease resistance protein At4g27190-like isoform X1 [Durio zibethinus]	2594-2612	2.5	GO:0005524(ATP binding);GO:0005739(mitochondrion);GO:0006952(defense response);GO:0043531(ADP binding)	ko04626(Plant-pathogen interaction)
ath-MIR169g-p3_2ss7AG19GA	CSS0048213.1	CSS0048213	CSS0048213	copia-type reverse transcriptase-like protein [Arabidopsis thaliana]	1242-1259	2.5	GO:0003723(RNA binding);GO:0004525(ribonuclease III activity);GO:0005634(nucleus);GO:0005737(cytoplasm);GO:0016442(RISC complex);GO:0030422(production of siRNA involved in RNA interference)	ko00230(Purine metabolism);ko00240(Pyrimidine metabolism);ko03020(RNA polymerase)
ath-MIR169g-p3_2ss7AG19GA	CSS0019932.1	CSS0019932	CSS0019932	NA	56-73	2	-
ath-MIR169g-p3_2ss7AG19GA	CSS0048872.1	CSS0048872	CSS0048872	UDP-rhamnose:rhamnosyltransferase [Actinidia chinensis var. chinensis]	1518-1535	2.5	GO:0009813(flavonoid biosynthetic process);GO:0043231(intracellular membrane-bounded organelle);GO:0052696(flavonoid glucuronidation);GO:0080043(quercetin 3-O-glucosyltransferase activity);GO:0080044(quercetin 7-O-glucosyltransferase activity)
ath-MIR169g-p3_2ss7AG19GA	CSS0039401.1	CSS0039401	CSS0039401	High mobility group B protein [Actinidia chinensis var. chinensis]	1086-1104	2.5	GO:0003677(DNA binding);GO:0003682(chromatin binding);GO:0003700(DNA binding transcription factor activity);GO:0005515(protein binding);GO:0005634(nucleus);GO:0006338(chromatin remodeling);GO:0006351(transcription, DNA-templated);GO:0006355(regulation of transcription, DNA-templated)
ath-MIR169g-p3_2ss7AG19GA	CSS0004575.1	CSS0004575	CSS0004575	PREDICTED: zinc finger protein ZAT5 [Vitis vinifera]	888-906	2.5	GO:0003700(DNA binding transcription factor activity);GO:0005634(nucleus);GO:0043565(sequence-specific DNA binding);GO:0044212(transcription regulatory region DNA binding)
ath-MIR169g-p3_2ss7AG19GA	CSS0020993.1	CSS0020993	CSS0020993	PREDICTED: zinc finger protein ZAT5 [Vitis vinifera]	802-820	2.5	GO:0003700(DNA binding transcription factor activity);GO:0005634(nucleus);GO:0043565(sequence-specific DNA binding);GO:0044212(transcription regulatory region DNA binding)
ath-MIR169g-p3_2ss7AG19GA	CSS0041005.1	CSS0041005	CSS0041005	Alpha-L-fucosidase [Actinidia chinensis var. chinensis]	137-156	2.5	GO:0005773(vacuole)	ko00511(Other glycan degradation)
ath-MIR169g-p3_2ss7AG19GA	CSS0045964.1	CSS0045964	CSS0045964	Alpha-L-fucosidase [Actinidia chinensis var. chinensis]	115-134	2.5	GO:0005773(vacuole)	ko00511(Other glycan degradation)
ath-MIR169g-p3_2ss7AG19GA	CSS0005897.1	CSS0005897	CSS0005897	lactoylglutathione lyase isoform X1 [Prunus persica]	203-220	2.5	GO:0004462(lactoylglutathione lyase activity);GO:0005516(calmodulin binding);GO:0005829(cytosol);GO:0005975(carbohydrate metabolic process);GO:0009507(chloroplast);GO:0019243(methylglyoxal catabolic process to D-lactate via S-lactoyl-glutathione);GO:0046686(response to cadmium ion);GO:0046872(metal ion binding)	ko00620(Pyruvate metabolism)
ath-MIR169g-p3_2ss7AG19GA	CSS0030037.1	CSS0030037	CSS0030037	Rust resistance kinase Lr10 [Vitis vinifera]	509-527	2	GO:0005886(plasma membrane)
ath-MIR169g-p3_2ss7AG19GA	CSS0038995.1	CSS0038995	CSS0038995	aquaporin protein 11 [Camellia sinensis]	1339-1357	1.5	GO:0005773(vacuole);GO:0005887(integral component of plasma membrane);GO:0009506(plasmodesma);GO:0009992(cellular water homeostasis);GO:0015250(water channel activity);GO:0015254(glycerol channel activity);GO:0034220(ion transmembrane transport)
ath-MIR169g-p3_2ss7AG19GA	CSS0025243.1	CSS0025243	CSS0025243	Rho GTPase-activating protein [Actinidia chinensis var. chinensis]	252-271	1.5	GO:0005096(GTPase activator activity);GO:0005737(cytoplasm);GO:0005886(plasma membrane);GO:0007165(signal transduction);GO:0007275(multicellular organism development);GO:0009531(secondary cell wall);GO:0009664(plant-type cell wall organization)
ath-MIR169g-p3_2ss7AG19GA	CSS0013796.1	CSS0013796	CSS0013796	Receptor-like protein kinase BRI1-like [Actinidia chinensis var. chinensis]	211-229	2.5	GO:0004672(protein kinase activity);GO:0004674(protein serine/threonine kinase activity);GO:0004714(transmembrane receptor protein tyrosine kinase activity);GO:0005496(steroid binding);GO:0005524(ATP binding);GO:0005886(plasma membrane);GO:0016021(integral component of membrane)	ko04075(Plant hormone signal transduction)
ath-MIR169g-p3_2ss7AG19GA	CSS0017691.1	CSS0017691	CSS0017691	Transcription termination factor like [Actinidia chinensis var. chinensis]	101-119	2	GO:0003690(double-stranded DNA binding);GO:0006355(regulation of transcription, DNA-templated);GO:0009507(chloroplast);GO:0016020(membrane)
ath-MIR169g-p3_2ss7AG19GA	CSS0009695.1	CSS0009695	CSS0009695	Transcription termination factor like [Actinidia chinensis var. chinensis]	101-119	2	GO:0003690(double-stranded DNA binding);GO:0006355(regulation of transcription, DNA-templated);GO:0009507(chloroplast);GO:0016020(membrane)
ath-MIR169g-p3_2ss7AG19GA	CSS0004303.1	CSS0004303	CSS0004303	Farnesylcysteine lyase [Actinidia chinensis var. chinensis]	101-119	2.5	GO:0001735(prenylcysteine oxidase activity);GO:0005774(vacuolar membrane);GO:0030327(prenylated protein catabolic process);GO:0030328(prenylcysteine catabolic process)	ko00900(Terpenoid backbone biosynthesis)
ath-MIR169g-p3_2ss7AG19GA	CSS0041782.1	CSS0041782	CSS0041782	Transcription termination factor like [Actinidia chinensis var. chinensis]	68-86	2.5	GO:0003690(double-stranded DNA binding);GO:0006355(regulation of transcription, DNA-templated);GO:0009507(chloroplast);GO:0016020(membrane)
ath-MIR169g-p3_2ss7AG19GA	CSS0004786.1	CSS0004786	CSS0004786	Phototropin-1 like [Actinidia chinensis var. chinensis]	137-155	2.5	GO:0004674(protein serine/threonine kinase activity);GO:0005634(nucleus);GO:0005737(cytoplasm);GO:0005886(plasma membrane);GO:0035556(intracellular signal transduction)
ath-MIR169g-p3_2ss7AG19GA	CSS0049426.1	CSS0049426	CSS0049426	Transcription factor bHLH51 like [Actinidia chinensis var. chinensis]	184-202	1.5	GO:0005634(nucleus)
ath-MIR169g-p3_2ss7AG19GA	CSS0002748.1	CSS0002748	CSS0002748	Transcription termination factor like [Actinidia chinensis var. chinensis]	101-119	2	GO:0003690(double-stranded DNA binding);GO:0006355(regulation of transcription, DNA-templated);GO:0009507(chloroplast);GO:0016020(membrane)
ath-MIR169g-p3_2ss7AG19GA	CSS0005141.1	CSS0005141	CSS0005141	protein MIZU-KUSSEI 1-like [Herrania umbratica]	216-235	2	GO:0003674(molecular_function);GO:0005634(nucleus);GO:0008150(biological_process)
ath-MIR169g-p3_2ss7AG19GA	CSS0039929.1	CSS0039929	CSS0039929	galactan beta-1,4-galactosyltransferase GALS1 [Sesamum indicum]	35-53	2	GO:0000139(Golgi membrane);GO:0005794(Golgi apparatus);GO:0016021(integral component of membrane);GO:0042546(cell wall biogenesis);GO:0045489(pectin biosynthetic process);GO:0048531(beta-1,3-galactosyltransferase activity);GO:0071555(cell wall organization)
ath-MIR169g-p3_2ss7AG19GA	CSS0008582.1	CSS0008582	CSS0008582	Casein kinase 1-like protein [Actinidia chinensis var. chinensis]	30-48	2	GO:0004674(protein serine/threonine kinase activity);GO:0005634(nucleus);GO:0005737(cytoplasm);GO:0006897(endocytosis);GO:0008360(regulation of cell shape);GO:0016055(Wnt signaling pathway);GO:0018105(peptidyl-serine phosphorylation)
ath-MIR169g-p3_2ss7AG19GA	CSS0047531.1	CSS0047531	CSS0047531	Protein YeeZ like [Actinidia chinensis var. chinensis]	162-179	2	GO:0009507(chloroplast);GO:0009570(chloroplast stroma)
ath-MIR169g-p3_2ss7AG19GA	CSS0027308.1	CSS0027308	CSS0027308	Protein FAR1-RELATED SEQUENCE 10 [Actinidia chinensis var. chinensis]	136-155	2.5	GO:0005634(nucleus);GO:0006355(regulation of transcription, DNA-templated);GO:0008270(zinc ion binding);GO:0009639(response to red or far red light)
ath-MIR169g-p3_2ss7AG19GA	CSS0002260.1	CSS0002260	CSS0002260	nuclear pore complex protein NUP62-like isoform X2 [Hevea brasiliensis]	210-228	2.5	-
ath-MIR169g-p3_2ss7AG19GA	CSS0034665.1	CSS0034665	CSS0034665	Beta-fructofuranosidase, insoluble isoenzyme like [Actinidia chinensis var. chinensis]	38-56	2.5	GO:0004553(hydrolase activity, hydrolyzing O-glycosyl compounds);GO:0004564(beta-fructofuranosidase activity);GO:0004575(sucrose alpha-glucosidase activity);GO:0005515(protein binding);GO:0005576(extracellular region);GO:0005618(cell wall);GO:0005886(plasma membrane);GO:0005975(carbohydrate metabolic process);GO:0009611(response to wounding);GO:0048046(apoplast);GO:0050832(defense response to fun…	ko00052(Galactose metabolism);ko00500(Starch and sucrose metabolism)
ath-MIR169g-p3_2ss7AG19GA	CSS0019229.1	CSS0019229	CSS0019229	Protein HOTHEAD like [Actinidia chinensis var. chinensis]	244-262	2.5	GO:0005576(extracellular region);GO:0007267(cell-cell signaling);GO:0009553(embryo sac development);GO:0010430(fatty acid omega-oxidation);GO:0016614(oxidoreductase activity, acting on CH-OH group of donors);GO:0016832(aldehyde-lyase activity);GO:0046593(mandelonitrile lyase activity);GO:0050660(flavin adenine dinucleotide binding);GO:0055114(oxidation-reduction process)	ko00073(Cutin, suberine and wax biosynthesis)
ath-MIR169g-p3_2ss7AG19GA	CSS0008560.1	CSS0008560	CSS0008560	PREDICTED: ATP-dependent zinc metalloprotease FTSH 10, mitochondrial-like isoform X2 [Juglans regia]	2-20	2.5	GO:0004176(ATP-dependent peptidase activity);GO:0005743(mitochondrial inner membrane);GO:0008053(mitochondrial fusion);GO:0008237(metallopeptidase activity);GO:0009535(chloroplast thylakoid membrane);GO:0034982(mitochondrial protein processing);GO:0042407(cristae formation);GO:0045041(protein import into mitochondrial intermembrane space)
ath-MIR169g-p3_2ss7AG19GA	CSS0047976.1	CSS0047976	CSS0047976	IST1 like [Actinidia chinensis var. chinensis]	136-154	2.5	GO:0005737(cytoplasm);GO:0006979(response to oxidative stress);GO:0015031(protein transport)	ko04144(Endocytosis)
ath-MIR169g-p3_2ss7AG19GA	CSS0026422.1	CSS0026422	CSS0026422	Rust resistance kinase [Actinidia chinensis var. chinensis]	163-181	2.5	GO:0005886(plasma membrane)
ath-MIR169g-p3_2ss7AG19GA	CSS0038323.1	CSS0038323	CSS0038323	Rust resistance kinase [Actinidia chinensis var. chinensis]	163-181	2.5	GO:0005886(plasma membrane)
ath-MIR169g-p3_2ss7AG19GA	CSS0000101.1	CSS0000101	CSS0000101	50S ribosomal protein [Actinidia chinensis var. chinensis]	45-62	2	GO:0003735(structural constituent of ribosome);GO:0005840(ribosome);GO:0006412(translation);GO:0009507(chloroplast);GO:0009570(chloroplast stroma);GO:0009941(chloroplast envelope);GO:0016020(membrane);GO:0019843(rRNA binding)	ko03010(Ribosome)
ath-MIR169g-p3_2ss7AG19GA	CSS0025682.1	CSS0025682	CSS0025682	Transcription factor bHLH130 like [Actinidia chinensis var. chinensis]	557-575	2	GO:0001046(core promoter sequence-specific DNA binding);GO:0001228(transcriptional activator activity, RNA polymerase II transcription regulatory region sequence-specific DNA binding);GO:0005634(nucleus);GO:0006366(transcription by RNA polymerase II)
ath-MIR169g-p3_2ss7AG19GA	CSS0033602.1	CSS0033602	CSS0033602	hypothetical protein CEY00_Acc12681 [Actinidia chinensis var. chinensis]	806-823	2	GO:0003674(molecular_function);GO:0005634(nucleus);GO:0009910(negative regulation of flower development);GO:0016571(histone methylation)
ath-MIR169g-p3_2ss7AG19GA	CSS0028033.1	CSS0028033	CSS0028033	LIM domain-containing serine/threonine-protein kinase [Actinidia chinensis var. chinensis]	508-525	2	GO:0003674(molecular_function);GO:0005739(mitochondrion);GO:0008150(biological_process);GO:0016021(integral component of membrane)
ath-MIR169g-p3_2ss7AG19GA	CSS0013444.1	CSS0013444	CSS0013444	GATA transcription factor [Actinidia chinensis var. chinensis]	1087-1104	2.5	GO:0000977(RNA polymerase II regulatory region sequence-specific DNA binding);GO:0001085(RNA polymerase II transcription factor binding);GO:0001228(transcriptional activator activity, RNA polymerase II transcription regulatory region sequence-specific DNA binding);GO:0003682(chromatin binding);GO:0005634(nucleus);GO:0005667(transcription factor complex);GO:0030154(cell differentiation)
ath-MIR169g-p3_2ss7AG19GA	CSS0005210.1	CSS0005210	CSS0005210	Protein translocase subunit SecA like [Actinidia chinensis var. chinensis]	225-243	2.5	-
ath-MIR169g-p3_2ss7AG19GA	CSS0010251.1	CSS0010251	CSS0010251	Protein BEARSKIN2 [Vitis vinifera]	1125-1142	2.5	GO:0003677(DNA binding);GO:0003700(DNA binding transcription factor activity);GO:0005634(nucleus);GO:0006351(transcription, DNA-templated);GO:0007275(multicellular organism development);GO:0009834(plant-type secondary cell wall biogenesis);GO:0010628(positive regulation of gene expression);GO:0045893(positive regulation of transcription, DNA-templated);GO:0048829(root cap development)	ko03013(RNA transport);ko03015(mRNA surveillance pathway);ko03018(RNA degradation)
ath-MIR169g-p3_2ss7AG19GA	CSS0035623.1	CSS0035623	CSS0035623	PREDICTED: DNA repair RAD52-like protein 1, mitochondrial [Ipomoea nil]	38-56	2.5	GO:0000373(Group II intron splicing);GO:0000724(double-strand break repair via homologous recombination);GO:0003677(DNA binding);GO:0003690(double-stranded DNA binding);GO:0003697(single-stranded DNA binding);GO:0005515(protein binding);GO:0005634(nucleus);GO:0005739(mitochondrion);GO:0006281(DNA repair);GO:0050897(cobalt ion binding)
ath-MIR169g-p3_2ss7AG19GA	CSS0040374.1	CSS0040374	CSS0040374	PREDICTED: RNA-binding protein 38 isoform X1 [Theobroma cacao]	2171-2189	2.5	GO:0003723(RNA binding);GO:0003729(mRNA binding);GO:0005576(extracellular region);GO:0008150(biological_process)	ko03040(Spliceosome)
ath-MIR169g-p3_2ss7AG19GA	CSS0033472.1	CSS0033472	CSS0033472	Protein argonaute like [Actinidia chinensis var. chinensis]	110-127	2	GO:0003743(translation initiation factor activity);GO:0005515(protein binding);GO:0005737(cytoplasm);GO:0006351(transcription, DNA-templated);GO:0006355(regulation of transcription, DNA-templated);GO:0006417(regulation of translation);GO:0007275(multicellular organism development);GO:0010586(miRNA metabolic process);GO:0031047(gene silencing by RNA);GO:0035019(somatic stem cell population mainten…
ath-MIR169g-p3_2ss7AG19GA	CSS0037722.1	CSS0037722	CSS0037722	Acylamino-acid-releasing enzyme like [Actinidia chinensis var. chinensis]	75-92	2	GO:0005634(nucleus);GO:0005737(cytoplasm);GO:0005773(vacuole);GO:0005829(cytosol);GO:0006508(proteolysis);GO:0009507(chloroplast);GO:0051289(protein homotetramerization);GO:0070009(serine-type aminopeptidase activity)
ath-MIR169g-p3_2ss7AG19GA	CSS0020669.1	CSS0020669	CSS0020669	Developmental and secondary metabolism regulator veA like [Actinidia chinensis var. chinensis]	875-893	2	GO:0003674(molecular_function);GO:0005634(nucleus);GO:0008150(biological_process);GO:0016021(integral component of membrane)
ath-MIR169g-p3_2ss7AG19GA	CSS0048410.1	CSS0048410	CSS0048410	Desmoplakin like [Actinidia chinensis var. chinensis]	115-133	2.5	-
ath-MIR169g-p3_2ss7AG19GA	CSS0024855.1	CSS0024855	CSS0024855	Pentatricopeptide repeat-containing protein [Actinidia chinensis var. chinensis]	35-53	2.5	GO:0003723(RNA binding);GO:0004519(endonuclease activity);GO:0005515(protein binding);GO:0005739(mitochondrion);GO:0006397(mRNA processing);GO:0008270(zinc ion binding);GO:0009507(chloroplast);GO:0016556(mRNA modification);GO:0031425(chloroplast RNA processing);GO:1900865(chloroplast RNA modification)	ko03440(Homologous recombination)
ath-MIR169g-p3_2ss7AG19GA	CSS0000075.1	CSS0000075	CSS0000075	Flocculation protein [Actinidia chinensis var. chinensis]	838-857	2.5	GO:0005634(nucleus);GO:0008150(biological_process)
ath-MIR169g-p3_2ss7AG19GA	CSS0005639.1	CSS0005639	CSS0005639	E3 ubiquitin-protein ligase LUL4 [Actinidia chinensis var. chinensis]	704-722	2.5	GO:0005516(calmodulin binding);GO:0005634(nucleus);GO:0008270(zinc ion binding)
ath-MIR169g-p3_2ss7AG19GA	CSS0001007.1	CSS0001007	CSS0001007	NDR1/HIN1-Like protein [Actinidia chinensis var. chinensis]	227-246	2.5	GO:0003674(molecular_function);GO:0005829(cytosol);GO:0005886(plasma membrane);GO:0006970(response to osmotic stress);GO:0009737(response to abscisic acid);GO:0009738(abscisic acid-activated signaling pathway);GO:0010116(positive regulation of abscisic acid biosynthetic process);GO:0016021(integral component of membrane);GO:1902074(response to salt)
ath-MIR169g-p3_2ss7AG19GA	CSS0007030.1	CSS0007030	CSS0007030	Chaperone protein like [Actinidia chinensis var. chinensis]	11-29	2	GO:0005524(ATP binding);GO:0009507(chloroplast);GO:0009570(chloroplast stroma);GO:0009941(chloroplast envelope);GO:0016887(ATPase activity);GO:0019538(protein metabolic process);GO:0034214(protein hexamerization);GO:0042803(protein homodimerization activity)
ath-MIR169g-p3_2ss7AG19GA	CSS0029450.1	CSS0029450	CSS0029450	Chaperone protein like [Actinidia chinensis var. chinensis]	644-662	2	GO:0005524(ATP binding);GO:0009507(chloroplast);GO:0009570(chloroplast stroma);GO:0009941(chloroplast envelope);GO:0016887(ATPase activity);GO:0019538(protein metabolic process);GO:0034214(protein hexamerization);GO:0042803(protein homodimerization activity)
ath-MIR169g-p3_2ss7AG19GA	CSS0005073.1	CSS0005073	CSS0005073	transcription factor FAMA-like isoform X1 [Hevea brasiliensis]	114-131	2.5	GO:0003677(DNA binding);GO:0003700(DNA binding transcription factor activity);GO:0005515(protein binding);GO:0005634(nucleus);GO:0006351(transcription, DNA-templated);GO:0010052(guard cell differentiation);GO:0010377(guard cell fate commitment);GO:0010444(guard mother cell differentiation);GO:0045597(positive regulation of cell differentiation);GO:0045893(positive regulation of transcription, DNA…	ko04016(MAPK signaling pathway - plant)
ath-MIR169g-p3_2ss7AG19GA	CSS0001258.1	CSS0001258	CSS0001258	PREDICTED: mitochondrial phosphate carrier protein 3, mitochondrial [Vitis vinifera]	175-193	2.5	GO:0003735(structural constituent of ribosome);GO:0006412(translation)
ath-MIR169g-p3_2ss7AG19GA	CSS0024217.1	CSS0024217	CSS0024217	Mitochondrial phosphate carrier protein like [Actinidia chinensis var. chinensis]	244-263	2	GO:0003735(structural constituent of ribosome);GO:0006412(translation)
ath-MIR169g-p3_2ss7AG19GA	CSS0010948.1	CSS0010948	CSS0010948	F-box protein At5g07610-like [Rosa chinensis]	88-107	2	GO:0004842(ubiquitin-protein transferase activity);GO:0019005(SCF ubiquitin ligase complex);GO:0031146(SCF-dependent proteasomal ubiquitin-dependent protein catabolic process)
ath-MIR169g-p3_2ss7AG19GA	CSS0038088.1	CSS0038088	CSS0038088	E3 ubiquitin-protein like [Actinidia chinensis var. chinensis]	144-162	2.5	GO:0043161(proteasome-mediated ubiquitin-dependent protein catabolic process);GO:0061630(ubiquitin protein ligase activity)
ath-MIR169g-p3_2ss7AG19GA	CSS0000138.1	CSS0000138	CSS0000138	Peptidyl-tRNA hydrolase [Actinidia chinensis var. chinensis]	27-44	2	GO:0004045(aminoacyl-tRNA hydrolase activity);GO:0005739(mitochondrion);GO:0032543(mitochondrial translation)
ath-MIR169g-p3_2ss7AG19GA	CSS0037137.1	CSS0037137	CSS0037137	urease accessory protein G [Olea europaea var. sylvestris]	87-106	2	GO:0000166(nucleotide binding);GO:0003924(GTPase activity);GO:0005525(GTP binding);GO:0005737(cytoplasm);GO:0006807(nitrogen compound metabolic process);GO:0016020(membrane);GO:0016151(nickel cation binding);GO:0043085(positive regulation of catalytic activity);GO:0046872(metal ion binding);GO:1905182(positive regulation of urease activity)
ath-MIR169g-p3_2ss7AG19GA	CSS0034971.1	CSS0034971	CSS0034971	Polygalacturonase [Actinidia chinensis var. chinensis]	54-71	2	GO:0004650(polygalacturonase activity);GO:0005576(extracellular region);GO:0005975(carbohydrate metabolic process)	ko00040(Pentose and glucuronate interconversions)
ath-MIR169g-p3_2ss7AG19GA	CSS0015219.1	CSS0015219	CSS0015219	cyclin B [Camellia sinensis]	1765-1783	2.5	GO:0005515(protein binding);GO:0005634(nucleus);GO:0005737(cytoplasm);GO:0007049(cell cycle);GO:0010332(response to gamma radiation);GO:0016538(cyclin-dependent protein serine/threonine kinase regulator activity);GO:0051301(cell division);GO:0051726(regulation of cell cycle)
ath-MIR169g-p3_2ss7AG19GA	CSS0013509.1	CSS0013509	CSS0013509	Tyrosine-specific transport protein [Actinidia chinensis var. chinensis]	104-121	2	GO:0005275(amine transmembrane transporter activity);GO:0005886(plasma membrane);GO:0006865(amino acid transport);GO:0009507(chloroplast);GO:0009706(chloroplast inner membrane);GO:0015173(aromatic amino acid transmembrane transporter activity);GO:0015801(aromatic amino acid transport);GO:0016020(membrane)
ath-MIR169g-p3_2ss7AG19GA	CSS0010123.1	CSS0010123	CSS0010123	Protein kinase domain [Macleaya cordata]	284-301	2	GO:0004672(protein kinase activity);GO:0004674(protein serine/threonine kinase activity);GO:0004712(protein serine/threonine/tyrosine kinase activity);GO:0005515(protein binding);GO:0005783(endoplasmic reticulum);GO:0005886(plasma membrane);GO:0006970(response to osmotic stress);GO:0009898(cytoplasmic side of plasma membrane);GO:0016301(kinase activity);GO:0035556(intracellular signal transductio…
ath-MIR169g-p3_2ss7AG19GA	CSS0005164.1	CSS0005164	CSS0005164	Protein kinase [Actinidia chinensis var. chinensis]	128-146	2	GO:0000245(spliceosomal complex assembly);GO:0004672(protein kinase activity);GO:0004674(protein serine/threonine kinase activity);GO:0005634(nucleus);GO:0005737(cytoplasm);GO:0006468(protein phosphorylation);GO:0006979(response to oxidative stress);GO:0016301(kinase activity);GO:0035556(intracellular signal transduction);GO:0050684(regulation of mRNA processing)
ath-MIR169g-p3_2ss7AG19GA	CSS0030158.1	CSS0030158	CSS0030158	Hypothetical protein [Arabidopsis thaliana]	1271-1289	2.5	GO:0004596(peptide alpha-N-acetyltransferase activity);GO:0005737(cytoplasm);GO:0017196(N-terminal peptidyl-methionine acetylation)	ko00230(Purine metabolism);ko00240(Pyrimidine metabolism);ko03020(RNA polymerase)
ath-MIR169g-p3_2ss7AG19GA	CSS0002981.1	CSS0002981	CSS0002981	NA	65-83	2.5	-
ath-MIR169g-p3_2ss7AG19GA	CSS0008603.1	CSS0008603	CSS0008603	unnamed protein product, partial [Vitis vinifera]	50-68	2.5	GO:0004561(alpha-N-acetylglucosaminidase activity);GO:0005773(vacuole);GO:0008152(metabolic process);GO:0009507(chloroplast);GO:0009793(embryo development ending in seed dormancy);GO:0051781(positive regulation of cell division)	ko00531(Glycosaminoglycan degradation)
ath-MIR169g-p3_2ss7AG19GA	CSS0003927.1	CSS0003927	CSS0003927	Prolycopene isomerase [Actinidia chinensis var. chinensis]	2196-2213	2.5	GO:0009507(chloroplast);GO:0009662(etioplast organization);GO:0016117(carotenoid biosynthetic process);GO:0016491(oxidoreductase activity);GO:0031969(chloroplast membrane);GO:0046608(carotenoid isomerase activity);GO:0055114(oxidation-reduction process)	ko00906(Carotenoid biosynthesis)
ath-MIR169g-p3_2ss7AG19GA	CSS0033024.1	CSS0033024	CSS0033024	Protein indeterminate-domain like [Actinidia chinensis var. chinensis]	93-111	2.5	GO:0003676(nucleic acid binding);GO:0003700(DNA binding transcription factor activity);GO:0005515(protein binding);GO:0005634(nucleus);GO:0006351(transcription, DNA-templated);GO:0006355(regulation of transcription, DNA-templated);GO:0008270(zinc ion binding);GO:0009937(regulation of gibberellic acid mediated signaling pathway);GO:0010029(regulation of seed germination);GO:0010431(seed maturation…	ko00052(Galactose metabolism);ko00600(Sphingolipid metabolism);ko00531(Glycosaminoglycan degradation);ko00604(Glycosphingolipid biosynthesis - ganglio series);ko00511(Other glycan degradation)
ath-MIR169g-p3_2ss7AG19GA	CSS0046951.1	CSS0046951	CSS0046951	purple acid phosphatase 2 [Sesamum indicum]	1573-1591	2.5	GO:0003993(acid phosphatase activity);GO:0005615(extracellular space);GO:0030145(manganese ion binding);GO:0046872(metal ion binding)	ko00130(Ubiquinone and other terpenoid-quinone biosynthesis)
ath-MIR169g-p3_2ss7AG19GA	CSS0007222.1	CSS0007222	CSS0007222	Glucuronoxylan glucuronosyltransferase F8H [Actinidia chinensis var. chinensis]	101-120	2.5	GO:0003824(catalytic activity);GO:0005768(endosome);GO:0005794(Golgi apparatus);GO:0005802(trans-Golgi network);GO:0008150(biological_process);GO:0016020(membrane)
ath-MIR169g-p3_2ss7AG19GA	CSS0040503.1	CSS0040503	CSS0040503	probable galacturonosyltransferase 14 isoform X2 [Durio zibethinus]	432-450	2	GO:0000139(Golgi membrane);GO:0005794(Golgi apparatus);GO:0009555(pollen development);GO:0009860(pollen tube growth);GO:0016021(integral component of membrane);GO:0016051(carbohydrate biosynthetic process);GO:0016757(transferase activity, transferring glycosyl groups);GO:0016758(transferase activity, transferring hexosyl groups);GO:0047262(polygalacturonate 4-alpha-galacturonosyltransferase activ…
ath-MIR169g-p3_2ss7AG19GA	CSS0034685.1	CSS0034685	CSS0034685	MDIS1-interacting receptor like kinase 2-like [Quercus suber]	2375-2393	2.5	GO:0004674(protein serine/threonine kinase activity);GO:0005515(protein binding);GO:0005524(ATP binding);GO:0005634(nucleus);GO:0005886(plasma membrane);GO:0006468(protein phosphorylation);GO:0009506(plasmodesma);GO:0009755(hormone-mediated signaling pathway);GO:0010183(pollen tube guidance);GO:0016020(membrane);GO:0016021(integral component of membrane);GO:0016301(kinase activity);GO:0090406(pol…
ath-MIR169g-p3_2ss7AG19GA	CSS0034685.1	CSS0034685	CSS0034685	MDIS1-interacting receptor like kinase 2-like [Quercus suber]	2350-2369	2	GO:0004674(protein serine/threonine kinase activity);GO:0005515(protein binding);GO:0005524(ATP binding);GO:0005634(nucleus);GO:0005886(plasma membrane);GO:0006468(protein phosphorylation);GO:0009506(plasmodesma);GO:0009755(hormone-mediated signaling pathway);GO:0010183(pollen tube guidance);GO:0016020(membrane);GO:0016021(integral component of membrane);GO:0016301(kinase activity);GO:0090406(pol…
ath-MIR169g-p3_2ss7AG19GA	CSS0031492.1	CSS0031492	CSS0031492	Pheophytinase [Actinidia chinensis var. chinensis]	238-256	2.5	GO:0016787(hydrolase activity)
ath-MIR169g-p3_2ss7AG19GA	CSS0011563.1	CSS0011563	CSS0011563	PREDICTED: KUP2 isoform X1 [Vitis vinifera]	2299-2316	2.5	GO:0005886(plasma membrane);GO:0015079(potassium ion transmembrane transporter activity)
ath-MIR169g-p3_2ss7AG19GA	CSS0013638.1	CSS0013638	CSS0013638	WRKY transcription factor 33 [Actinidia chinensis var. chinensis]	268-285	2	GO:0003700(DNA binding transcription factor activity);GO:0005515(protein binding);GO:0005634(nucleus);GO:0006351(transcription, DNA-templated);GO:0006355(regulation of transcription, DNA-templated);GO:0006970(response to osmotic stress);GO:0009408(response to heat);GO:0009409(response to cold);GO:0009414(response to water deprivation);GO:0009651(response to salt stress);GO:0010120(camalexin biosy…	ko04016(MAPK signaling pathway - plant);ko04626(Plant-pathogen interaction)
ath-MIR169g-p3_2ss7AG19GA	CSS0013638.1	CSS0013638	CSS0013638	WRKY transcription factor 33 [Actinidia chinensis var. chinensis]	182-200	2	GO:0003700(DNA binding transcription factor activity);GO:0005515(protein binding);GO:0005634(nucleus);GO:0006351(transcription, DNA-templated);GO:0006355(regulation of transcription, DNA-templated);GO:0006970(response to osmotic stress);GO:0009408(response to heat);GO:0009409(response to cold);GO:0009414(response to water deprivation);GO:0009651(response to salt stress);GO:0010120(camalexin biosy…	ko04016(MAPK signaling pathway - plant);ko04626(Plant-pathogen interaction)
ath-MIR169g-p3_2ss7AG19GA	CSS0037181.1	CSS0037181	CSS0037181	RING finger and transmembrane domain-containing protein [Actinidia chinensis var. chinensis]	82-99	2	GO:0008270(zinc ion binding);GO:0016021(integral component of membrane)
ath-MIR169g-p3_2ss7AG19GA	CSS0016841.1	CSS0016841	CSS0016841	protein SUPPRESSOR OF K(+) TRANSPORT GROWTH DEFECT 1-like [Olea europaea var. sylvestris]	272-290	2.5	GO:0005634(nucleus);GO:0007033(vacuole organization);GO:0008568(microtubule-severing ATPase activity);GO:0031122(cytoplasmic microtubule organization)	ko04144(Endocytosis)
ath-MIR169g-p3_2ss7AG19GA	CSS0038046.1	CSS0038046	CSS0038046	Inactive poly [ADP-ribose] polymerase [Actinidia chinensis var. chinensis]	259-276	2.5	GO:0003950(NAD+ ADP-ribosyltransferase activity);GO:0005634(nucleus);GO:0006970(response to osmotic stress);GO:0006979(response to oxidative stress);GO:0009651(response to salt stress);GO:0009793(embryo development ending in seed dormancy);GO:0010102(lateral root morphogenesis);GO:0016363(nuclear matrix);GO:0048573(photoperiodism, flowering)
ath-MIR169g-p3_2ss7AG19GA	CSS0031909.1	CSS0031909	CSS0031909	uncharacterized protein LOC113863724 isoform X1 [Abrus precatorius]	119-137	2.5	-
ath-MIR169g-p3_2ss7AG19GA	CSS0022966.1	CSS0022966	CSS0022966	AP2-like ethylene-responsive transcription factor BBM [Vitis vinifera]	2098-2116	1.5	GO:0003677(DNA binding);GO:0003700(DNA binding transcription factor activity);GO:0005634(nucleus);GO:0006351(transcription, DNA-templated);GO:0006355(regulation of transcription, DNA-templated);GO:0007275(multicellular organism development);GO:1905392(plant organ morphogenesis)
ath-MIR169g-p3_2ss7AG19GA	CSS0012303.1	CSS0012303	CSS0012303	MDIS1-interacting receptor like kinase [Actinidia chinensis var. chinensis]	695-713	2.5	GO:0004674(protein serine/threonine kinase activity);GO:0005515(protein binding);GO:0005524(ATP binding);GO:0005634(nucleus);GO:0005886(plasma membrane);GO:0006468(protein phosphorylation);GO:0009506(plasmodesma);GO:0009755(hormone-mediated signaling pathway);GO:0010183(pollen tube guidance);GO:0016020(membrane);GO:0016021(integral component of membrane);GO:0016301(kinase activity);GO:0090406(pol…
ath-MIR169g-p5_2ss7AG19GA	CSS0015390.1	CSS0015390	CSS0015390	PREDICTED: glucuronoxylan 4-O-methyltransferase 1-like [Daucus carota subsp. sativus]	254-273	2.5	GO:0000139(Golgi membrane);GO:0005576(extracellular region);GO:0005794(Golgi apparatus);GO:0008168(methyltransferase activity);GO:0016021(integral component of membrane);GO:0030775(glucuronoxylan 4-O-methyltransferase activity);GO:0032259(methylation);GO:0045491(xylan metabolic process);GO:0045492(xylan biosynthetic process)
ath-MIR169g-p5_2ss7AG19GA	CSS0006625.1	CSS0006625	CSS0006625	Pentatricopeptide repeat-containing protein [Actinidia chinensis var. chinensis]	35-53	2.5	GO:0003723(RNA binding);GO:0004519(endonuclease activity);GO:0005515(protein binding);GO:0005739(mitochondrion);GO:0006397(mRNA processing);GO:0008270(zinc ion binding);GO:0009507(chloroplast);GO:0016556(mRNA modification);GO:0031425(chloroplast RNA processing);GO:1900865(chloroplast RNA modification)
ath-MIR169g-p5_2ss7AG19GA	CSS0000374.1	CSS0000374	CSS0000374	Ferric reduction oxidase [Actinidia chinensis var. chinensis]	164-182	2.5	GO:0000293(ferric-chelate reductase activity);GO:0005739(mitochondrion);GO:0005886(plasma membrane);GO:0006811(ion transport);GO:0016020(membrane);GO:0016021(integral component of membrane);GO:0016491(oxidoreductase activity);GO:0031966(mitochondrial membrane);GO:0046872(metal ion binding);GO:0055114(oxidation-reduction process)
ath-MIR169g-p5_2ss7AG19GA	CSS0000374.1	CSS0000374	CSS0000374	Ferric reduction oxidase [Actinidia chinensis var. chinensis]	33-51	2.5	GO:0000293(ferric-chelate reductase activity);GO:0005739(mitochondrion);GO:0005886(plasma membrane);GO:0006811(ion transport);GO:0016020(membrane);GO:0016021(integral component of membrane);GO:0016491(oxidoreductase activity);GO:0031966(mitochondrial membrane);GO:0046872(metal ion binding);GO:0055114(oxidation-reduction process)
ath-MIR169g-p5_2ss7AG19GA	CSS0049082.1	CSS0049082	CSS0049082	AP2-like ethylene-responsive transcription factor BBM [Vitis vinifera]	2388-2406	1.5	GO:0003677(DNA binding);GO:0003700(DNA binding transcription factor activity);GO:0005634(nucleus);GO:0006351(transcription, DNA-templated);GO:0006355(regulation of transcription, DNA-templated);GO:0007275(multicellular organism development);GO:1905392(plant organ morphogenesis)
ath-MIR169g-p5_2ss7AG19GA	CSS0023504.1	CSS0023504	CSS0023504	PREDICTED: uncharacterized protein LOC101299947 [Fragaria vesca subsp. vesca]	104-121	2	GO:0009543(chloroplast thylakoid lumen);GO:0016021(integral component of membrane)
ath-MIR169g-p5_2ss7AG19GA	CSS0024512.1	CSS0024512	CSS0024512	probable glycosyltransferase At5g03795 [Sesamum indicum]	179-197	2.5	-
ath-MIR169g-p5_2ss7AG19GA	CSS0014734.1	CSS0014734	CSS0014734	PREDICTED: ferric reduction oxidase 7, chloroplastic-like [Juglans regia]	468-486	1.5	GO:0000293(ferric-chelate reductase activity);GO:0006811(ion transport);GO:0009507(chloroplast);GO:0009767(photosynthetic electron transport chain);GO:0016020(membrane);GO:0016021(integral component of membrane);GO:0016491(oxidoreductase activity);GO:0031969(chloroplast membrane);GO:0046872(metal ion binding);GO:0055114(oxidation-reduction process)
ath-MIR169g-p5_2ss7AG19GA	CSS0029077.1	CSS0029077	CSS0029077	Transcription factor like [Actinidia chinensis var. chinensis]	635-652	2	GO:0000981(RNA polymerase II transcription factor activity, sequence-specific DNA binding);GO:0001135(transcription factor activity, RNA polymerase II transcription factor recruiting);GO:0003677(DNA binding);GO:0003700(DNA binding transcription factor activity);GO:0005634(nucleus);GO:0006355(regulation of transcription, DNA-templated);GO:0006357(regulation of transcription by RNA polymerase II);G…
ath-MIR169g-p5_2ss7AG19GA	CSS0002211.1	CSS0002211	CSS0002211	Homeobox-leucine zipper protein [Actinidia chinensis var. chinensis]	79-97	2	GO:0003700(DNA binding transcription factor activity);GO:0005515(protein binding);GO:0005634(nucleus);GO:0006351(transcription, DNA-templated);GO:0006355(regulation of transcription, DNA-templated);GO:0009414(response to water deprivation);GO:0009735(response to cytokinin);GO:0009737(response to abscisic acid);GO:0009738(abscisic acid-activated signaling pathway);GO:0043565(sequence-specific DNA …
ath-MIR169g-p5_2ss7AG19GA	CSS0044671.1	CSS0044671	CSS0044671	Protein trichome birefringence like [Actinidia chinensis var. chinensis]	398-415	2.5	GO:0005794(Golgi apparatus);GO:0016413(O-acetyltransferase activity);GO:0071554(cell wall organization or biogenesis)
ath-MIR169g-p5_2ss7AG19GA	CSS0027619.1	CSS0027619	CSS0027619	putative disease resistance protein RGA3 [Prunus avium]	527-545	2	GO:0005515(protein binding);GO:0005524(ATP binding);GO:0005576(extracellular region);GO:0006952(defense response);GO:0043531(ADP binding)
ath-MIR169g-p5_2ss7AG19GA	CSS0023288.1	CSS0023288	CSS0023288	Flowering time control protein like [Actinidia chinensis var. chinensis]	1486-1503	2.5	-
ath-MIR169g-p5_2ss7AG19GA	CSS0040810.1	CSS0040810	CSS0040810	RGS1-HXK1-interacting protein 1-like isoform X2 [Coffea arabica]	59-77	2.5	-
ath-MIR169g-p5_2ss7AG19GA	CSS0000753.1	CSS0000753	CSS0000753	RGS1-HXK1-interacting protein 1-like isoform X2 [Coffea arabica]	59-77	2.5	-
ath-MIR169g-p5_2ss7AG19GA	CSS0003090.1	CSS0003090	CSS0003090	PREDICTED: mechanosensitive ion channel protein 6-like [Nelumbo nucifera]	1392-1410	2	GO:0005886(plasma membrane);GO:0006820(anion transport);GO:0008381(mechanosensitive ion channel activity)
ath-MIR169g-p5_2ss7AG19GA	CSS0004824.1	CSS0004824	CSS0004824	Vitamin K-dependent protein like [Actinidia chinensis var. chinensis]	272-291	2.5	GO:0004832(valine-tRNA ligase activity);GO:0005524(ATP binding);GO:0006438(valyl-tRNA aminoacylation);GO:0009507(chloroplast);GO:0009570(chloroplast stroma)
ath-MIR169g-p5_2ss7AG19GA	CSS0035435.1	CSS0035435	CSS0035435	RING-H2 finger protein [Actinidia chinensis var. chinensis]	677-696	2.5	GO:0005634(nucleus);GO:0008270(zinc ion binding);GO:0016021(integral component of membrane);GO:0016567(protein ubiquitination);GO:0043161(proteasome-mediated ubiquitin-dependent protein catabolic process);GO:0046872(metal ion binding);GO:0061630(ubiquitin protein ligase activity)
ath-MIR169g-p5_2ss7AG19GA	CSS0035435.1	CSS0035435	CSS0035435	RING-H2 finger protein [Actinidia chinensis var. chinensis]	657-675	1.5	GO:0005634(nucleus);GO:0008270(zinc ion binding);GO:0016021(integral component of membrane);GO:0016567(protein ubiquitination);GO:0043161(proteasome-mediated ubiquitin-dependent protein catabolic process);GO:0046872(metal ion binding);GO:0061630(ubiquitin protein ligase activity)
ath-MIR169g-p5_2ss7AG19GA	CSS0039901.1	CSS0039901	CSS0039901	LysM and putative peptidoglycan-binding domain-containing protein [Actinidia chinensis var. chinensis]	412-430	2.5	GO:0003674(molecular_function);GO:0005634(nucleus);GO:0016998(cell wall macromolecule catabolic process)
ath-MIR169g-p5_2ss7AG19GA	CSS0039901.1	CSS0039901	CSS0039901	LysM and putative peptidoglycan-binding domain-containing protein [Actinidia chinensis var. chinensis]	358-375	1	GO:0003674(molecular_function);GO:0005634(nucleus);GO:0016998(cell wall macromolecule catabolic process)
ath-MIR169g-p5_2ss7AG19GA	CSS0013690.1	CSS0013690	CSS0013690	WRKY transcription factor 50 [Actinidia chinensis var. chinensis]	130-148	2.5	GO:0003700(DNA binding transcription factor activity);GO:0005634(nucleus);GO:0006351(transcription, DNA-templated);GO:0006355(regulation of transcription, DNA-templated);GO:0009867(jasmonic acid mediated signaling pathway);GO:0043565(sequence-specific DNA binding);GO:0050832(defense response to fungus)	ko04016(MAPK signaling pathway - plant);ko04626(Plant-pathogen interaction)
ath-MIR169g-p5_2ss7AG19GA	CSS0025090.1	CSS0025090	CSS0025090	Light-harvesting complex-like protein OHP2, chloroplastic [Mucuna pruriens]	45-62	2.5	GO:0003674(molecular_function);GO:0009507(chloroplast);GO:0009534(chloroplast thylakoid);GO:0009535(chloroplast thylakoid membrane);GO:0009642(response to light intensity);GO:0016021(integral component of membrane)
ath-MIR169g-p5_2ss7AG19GA	CSS0015729.1	CSS0015729	CSS0015729	amino acid transporter ANTL1-like isoform X1 [Sesamum indicum]	140-158	2.5	GO:0003333(amino acid transmembrane transport);GO:0015171(amino acid transmembrane transporter activity)
ath-MIR169g-p5_2ss7AG19GA	CSS0045250.1	CSS0045250	CSS0045250	Switch like [Actinidia chinensis var. chinensis]	61-80	2	GO:0004386(helicase activity);GO:0005634(nucleus);GO:0016020(membrane)
ath-MIR169g-p5_2ss7AG19GA	CSS0030284.1	CSS0030284	CSS0030284	Class E vacuolar protein-sorting machinery protein [Actinidia chinensis var. chinensis]	854-873	2	-
ath-MIR169g-p5_2ss7AG19GA	CSS0036741.1	CSS0036741	CSS0036741	BOI-related E3 ubiquitin-protein ligase [Actinidia chinensis var. chinensis]	188-206	2.5	GO:0005737(cytoplasm)
ath-MIR169g-p5_2ss7AG19GA	CSS0014335.1	CSS0014335	CSS0014335	PREDICTED: phosphoglucomutase, cytoplasmic [Daucus carota subsp. sativus]	161-179	2.5	GO:0004614(phosphoglucomutase activity);GO:0005829(cytosol);GO:0005978(glycogen biosynthetic process);GO:0006006(glucose metabolic process);GO:0009570(chloroplast stroma);GO:0009590(detection of gravity);GO:0010319(stromule);GO:0019252(starch biosynthetic process);GO:0019388(galactose catabolic process)	ko00010(Glycolysis / Gluconeogenesis);ko00030(Pentose phosphate pathway);ko00052(Galactose metabolism);ko00500(Starch and sucrose metabolism);ko00520(Amino sugar and nucleotide sugar metabolism);ko00230(Purine metabolism)
ath-MIR169g-p5_2ss7AG19GA	CSS0031698.1	CSS0031698	CSS0031698	Exocyst complex component EXO70A1 like [Actinidia chinensis var. chinensis]	1854-1871	2.5	GO:0000145(exocyst);GO:0005634(nucleus);GO:0006887(exocytosis);GO:0006904(vesicle docking involved in exocytosis)
ath-MIR169g-p5_2ss7AG19GA	CSS0002854.1	CSS0002854	CSS0002854	Methionine--tRNA ligase [Actinidia chinensis var. chinensis]	79-97	2	GO:0004825(methionine-tRNA ligase activity);GO:0005829(cytosol);GO:0006431(methionyl-tRNA aminoacylation)	ko00450(Selenocompound metabolism);ko00970(Aminoacyl-tRNA biosynthesis)
ath-MIR169g-p5_2ss7AG19GA	CSS0020769.1	CSS0020769	CSS0020769	disease resistance protein At4g27190-like isoform X1 [Durio zibethinus]	2230-2249	2	GO:0005524(ATP binding);GO:0005739(mitochondrion);GO:0006952(defense response);GO:0043531(ADP binding)	ko04626(Plant-pathogen interaction)
ath-MIR169g-p5_2ss7AG19GA	CSS0014903.1	CSS0014903	CSS0014903	uncharacterized protein LOC105175119 [Sesamum indicum]	1341-1360	2.5	GO:0003674(molecular_function);GO:0005739(mitochondrion);GO:0008150(biological_process)
ath-MIR169g-p5_2ss7AG19GA	CSS0044767.1	CSS0044767	CSS0044767	uncharacterized protein LOC105175119 [Sesamum indicum]	1555-1574	2.5	GO:0003674(molecular_function);GO:0005739(mitochondrion);GO:0008150(biological_process)
ath-MIR169g-p5_2ss7AG19GA	CSS0002569.1	CSS0002569	CSS0002569	hypothetical protein CEY00_Acc27753 [Actinidia chinensis var. chinensis]	875-892	2.5	GO:0003674(molecular_function);GO:0005794(Golgi apparatus);GO:0008150(biological_process)
ath-MIR169g-p5_2ss7AG19GA	CSS0045295.1	CSS0045295	CSS0045295	E3 ubiquitin-protein like [Actinidia chinensis var. chinensis]	138-156	2.5	GO:0043161(proteasome-mediated ubiquitin-dependent protein catabolic process);GO:0061630(ubiquitin protein ligase activity)
ath-MIR169g-p5_2ss7AG19GA	CSS0039012.1	CSS0039012	CSS0039012	uncharacterized protein LOC113764470 isoform X2 [Coffea eugenioides]	59-77	2	GO:0070475(rRNA base methylation);GO:0071424(rRNA (cytosine-N4-)-methyltransferase activity)
ath-MIR169g-p5_2ss7AG19GA	CSS0023407.1	CSS0023407	CSS0023407	Pentatricopeptide repeat-containing protein [Actinidia chinensis var. chinensis]	66-85	2	GO:0003723(RNA binding);GO:0008150(biological_process);GO:0009507(chloroplast)
ath-MIR169g-p5_2ss7AG19GA	CSS0013787.1	CSS0013787	CSS0013787	Magnesium transporter like [Actinidia chinensis var. chinensis]	228-245	2	GO:0005886(plasma membrane);GO:0008150(biological_process);GO:0015095(magnesium ion transmembrane transporter activity);GO:0016021(integral component of membrane)
ath-MIR169g-p5_2ss7AG19GA	CSS0032266.1	CSS0032266	CSS0032266	Monothiol glutaredoxin-S14 like [Actinidia chinensis var. chinensis]	47-65	2.5	GO:0006812(cation transport);GO:0009055(electron transfer activity);GO:0009507(chloroplast);GO:0009570(chloroplast stroma);GO:0009941(chloroplast envelope);GO:0015035(protein disulfide oxidoreductase activity);GO:0015038(glutathione disulfide oxidoreductase activity);GO:0015297(antiporter activity);GO:0045454(cell redox homeostasis);GO:0046872(metal ion binding);GO:0051537(2 iron, 2 sulfur cluste…
ath-MIR169g-p5_2ss7AG19GA	CSS0027211.1	CSS0027211	CSS0027211	Pentatricopeptide repeat-containing protein [Actinidia chinensis var. chinensis]	142-161	2	GO:0003723(RNA binding);GO:0008150(biological_process);GO:0009507(chloroplast)
ath-MIR169g-p5_2ss7AG19GA	CSS0040122.1	CSS0040122	CSS0040122	Serine/threonine-protein kinase [Actinidia chinensis var. chinensis]	2257-2275	2	GO:0004674(protein serine/threonine kinase activity);GO:0005829(cytosol);GO:0006468(protein phosphorylation);GO:0035556(intracellular signal transduction)
ath-MIR169g-p5_2ss7AG19GA	CSS0022994.1	CSS0022994	CSS0022994	Transcription factor bHLH51 like [Actinidia chinensis var. chinensis]	151-169	1.5	GO:0005634(nucleus)
ath-MIR169g-p5_2ss7AG19GA	CSS0030779.1	CSS0030779	CSS0030779	Receptor-like protein kinase BRI1-like [Actinidia chinensis var. chinensis]	20-38	2.5	GO:0004672(protein kinase activity);GO:0004674(protein serine/threonine kinase activity);GO:0004714(transmembrane receptor protein tyrosine kinase activity);GO:0005496(steroid binding);GO:0005524(ATP binding);GO:0005886(plasma membrane);GO:0016021(integral component of membrane)	ko04075(Plant hormone signal transduction)
ath-MIR169g-p5_2ss7AG19GA	CSS0046985.1	CSS0046985	CSS0046985	PREDICTED: transcription factor RAX1 [Vitis vinifera]	51-68	2	GO:0000981(RNA polymerase II transcription factor activity, sequence-specific DNA binding);GO:0001135(transcription factor activity, RNA polymerase II transcription factor recruiting);GO:0003677(DNA binding);GO:0003700(DNA binding transcription factor activity);GO:0005515(protein binding);GO:0005634(nucleus);GO:0006351(transcription, DNA-templated);GO:0006355(regulation of transcription, DNA-temp…
ath-MIR169g-p5_2ss7AG19GA	CSS0018315.1	CSS0018315	CSS0018315	PREDICTED: transcription factor RAX1 [Vitis vinifera]	51-68	2	GO:0000981(RNA polymerase II transcription factor activity, sequence-specific DNA binding);GO:0001135(transcription factor activity, RNA polymerase II transcription factor recruiting);GO:0003677(DNA binding);GO:0003700(DNA binding transcription factor activity);GO:0005515(protein binding);GO:0005634(nucleus);GO:0006351(transcription, DNA-templated);GO:0006355(regulation of transcription, DNA-temp…
ath-MIR169g-p5_2ss7AG19GA	CSS0008661.1	CSS0008661	CSS0008661	Plexin-D1 like [Actinidia chinensis var. chinensis]	343-361	2	GO:0003674(molecular_function);GO:0005739(mitochondrion);GO:0008150(biological_process)
ath-MIR169g-p5_2ss7AG19GA	CSS0005679.1	CSS0005679	CSS0005679	uncharacterized protein LOC18032247 [Citrus clementina]	216-234	2.5	GO:0009507(chloroplast);GO:0009941(chloroplast envelope);GO:0016021(integral component of membrane)
ath-MIR169g-p5_2ss7AG19GA	CSS0030584.1	CSS0030584	CSS0030584	Transcription factor like [Actinidia chinensis var. chinensis]	287-305	1.5	GO:0000981(RNA polymerase II transcription factor activity, sequence-specific DNA binding);GO:0001135(transcription factor activity, RNA polymerase II transcription factor recruiting);GO:0003677(DNA binding);GO:0003682(chromatin binding);GO:0003700(DNA binding transcription factor activity);GO:0005515(protein binding);GO:0005634(nucleus);GO:0006351(transcription, DNA-templated);GO:0006355(regulat…
ath-MIR169g-p5_2ss7AG19GA	CSS0008692.1	CSS0008692	CSS0008692	NA	417-434	2.5	-
ath-MIR169g-p5_2ss7AG19GA	CSS0042731.3	CSS0042731	CSS0042731	Nudix hydrolase [Actinidia chinensis var. chinensis]	446-465	2.5	GO:0000210(NAD+ diphosphatase activity);GO:0005829(cytosol);GO:0006979(response to oxidative stress);GO:0016787(hydrolase activity);GO:0046872(metal ion binding);GO:0047631(ADP-ribose diphosphatase activity);GO:0051287(NAD binding)
ath-MIR169g-p5_2ss7AG19GA	CSS0018895.1	CSS0018895	CSS0018895	Pectate lyase [Actinidia chinensis var. chinensis]	177-194	2	GO:0005576(extracellular region);GO:0016829(lyase activity);GO:0030570(pectate lyase activity);GO:0045490(pectin catabolic process);GO:0046872(metal ion binding)	ko00040(Pentose and glucuronate interconversions)
ath-MIR169g-p5_2ss7AG19GA	CSS0035911.1	CSS0035911	CSS0035911	PREDICTED: putative cysteine-rich receptor-like protein kinase 43 [Vitis vinifera]	119-137	2	GO:0004674(protein serine/threonine kinase activity);GO:0005886(plasma membrane);GO:0006468(protein phosphorylation);GO:0006952(defense response);GO:0009506(plasmodesma)
ath-MIR169g-p5_2ss7AG19GA	CSS0046987.1	CSS0046987	CSS0046987	PREDICTED: putative cysteine-rich receptor-like protein kinase 43 [Vitis vinifera]	24-42	2	GO:0004674(protein serine/threonine kinase activity);GO:0005886(plasma membrane);GO:0006468(protein phosphorylation);GO:0006952(defense response);GO:0009506(plasmodesma)
ath-MIR169g-p5_2ss7AG19GA	CSS0035500.1	CSS0035500	CSS0035500	Kinase-like protein [Actinidia chinensis var. chinensis]	57-75	2.5	GO:0004672(protein kinase activity);GO:0005524(ATP binding);GO:0005886(plasma membrane);GO:0006468(protein phosphorylation);GO:0016021(integral component of membrane);GO:0016301(kinase activity);GO:0016310(phosphorylation)
ath-MIR169g-p5_2ss7AG19GA	CSS0047598.1	CSS0047598	CSS0047598	Kinase-like protein [Actinidia chinensis var. chinensis]	407-425	2.5	GO:0004672(protein kinase activity);GO:0005524(ATP binding);GO:0005886(plasma membrane);GO:0006468(protein phosphorylation);GO:0016021(integral component of membrane);GO:0016301(kinase activity);GO:0016310(phosphorylation)
ath-MIR169g-p5_2ss7AG19GA	CSS0031176.1	CSS0031176	CSS0031176	sucrose non-fermenting-1-related protein kinase 2.7 [Camellia sinensis]	83-100	2.5	GO:0004674(protein serine/threonine kinase activity);GO:0005634(nucleus);GO:0005737(cytoplasm);GO:0006468(protein phosphorylation);GO:0035556(intracellular signal transduction)	ko04016(MAPK signaling pathway - plant);ko04075(Plant hormone signal transduction)
ath-MIR169g-p5_2ss7AG19GA	CSS0021204.1	CSS0021204	CSS0021204	Dipeptidyl aminopeptidase [Actinidia chinensis var. chinensis]	17-35	2.5	GO:0005576(extracellular region);GO:0005829(cytosol);GO:0009507(chloroplast)
ath-MIR169g-p5_2ss7AG19GA	CSS0033550.1	CSS0033550	CSS0033550	Protein ALTERED XYLOGLUCAN 4-like [Actinidia chinensis var. chinensis]	2-20	2.5	GO:0005794(Golgi apparatus);GO:0016413(O-acetyltransferase activity);GO:0071554(cell wall organization or biogenesis)
ath-MIR169g-p5_2ss7AG19GA	CSS0002070.1	CSS0002070	CSS0002070	Dipeptidyl aminopeptidase [Actinidia chinensis var. chinensis]	62-79	2.5	GO:0005576(extracellular region);GO:0005829(cytosol);GO:0009507(chloroplast)
ath-MIR169g-p5_2ss7AG19GA	CSS0026931.1	CSS0026931	CSS0026931	Retrovirus-related Pol polyprotein from transposon RE1 [Vitis vinifera]	980-998	2	GO:0005739(mitochondrion)	ko04144(Endocytosis)
ath-MIR169g-p5_2ss7AG19GA	CSS0019308.1	CSS0019308	CSS0019308	PREDICTED: zinc-finger homeodomain protein 9 [Vitis vinifera]	14-32	2.5	GO:0003677(DNA binding);GO:0003700(DNA binding transcription factor activity);GO:0005515(protein binding);GO:0005634(nucleus);GO:0006351(transcription, DNA-templated);GO:0009414(response to water deprivation);GO:0042803(protein homodimerization activity);GO:0045893(positive regulation of transcription, DNA-templated);GO:0046872(metal ion binding)
ath-MIR169g-p5_2ss7AG19GA	CSS0008380.1	CSS0008380	CSS0008380	hypothetical protein MANES_18G102800 [Manihot esculenta]	255-274	2	GO:0000166(nucleotide binding);GO:0005515(protein binding);GO:0005524(ATP binding);GO:0005886(plasma membrane);GO:0006952(defense response);GO:0007165(signal transduction);GO:0009626(plant-type hypersensitive response);GO:0012505(endomembrane system);GO:0019897(extrinsic component of plasma membrane);GO:0043531(ADP binding)	ko04626(Plant-pathogen interaction)
ath-MIR169g-p5_2ss7AG19GA	CSS0044705.1	CSS0044705	CSS0044705	Disease resistance protein [Actinidia chinensis var. chinensis]	255-274	2	GO:0000166(nucleotide binding);GO:0005515(protein binding);GO:0005524(ATP binding);GO:0005886(plasma membrane);GO:0006952(defense response);GO:0007165(signal transduction);GO:0009626(plant-type hypersensitive response);GO:0012505(endomembrane system);GO:0019897(extrinsic component of plasma membrane);GO:0043531(ADP binding)	ko04626(Plant-pathogen interaction)
ath-MIR169g-p5_2ss7AG19GA	CSS0021802.1	CSS0021802	CSS0021802	Disease resistance protein [Actinidia chinensis var. chinensis]	434-453	2	GO:0000166(nucleotide binding);GO:0005515(protein binding);GO:0005524(ATP binding);GO:0005886(plasma membrane);GO:0006952(defense response);GO:0007165(signal transduction);GO:0009626(plant-type hypersensitive response);GO:0012505(endomembrane system);GO:0019897(extrinsic component of plasma membrane);GO:0043531(ADP binding)	ko04626(Plant-pathogen interaction)
ath-MIR169g-p5_2ss7AG19GA	CSS0024856.1	CSS0024856	CSS0024856	PREDICTED: uncharacterized protein LOC104597747 [Nelumbo nucifera]	139-157	1.5	GO:0000981(RNA polymerase II transcription factor activity, sequence-specific DNA binding);GO:0001135(transcription factor activity, RNA polymerase II transcription factor recruiting);GO:0003677(DNA binding);GO:0003700(DNA binding transcription factor activity);GO:0005515(protein binding);GO:0005634(nucleus);GO:0006351(transcription, DNA-templated);GO:0006355(regulation of transcription, DNA-temp…
ath-MIR169g-p5_2ss7AG19GA	CSS0048848.1	CSS0048848	CSS0048848	Disease resistance protein [Actinidia chinensis var. chinensis]	255-274	2	GO:0004857(enzyme inhibitor activity)	ko04626(Plant-pathogen interaction)
ath-MIR169g-p5_2ss7AG19GA	CSS0048997.1	CSS0048997	CSS0048997	transmembrane protein 184C [Prunus avium]	364-382	2.5	GO:0005215(transporter activity);GO:0006810(transport);GO:0016021(integral component of membrane)
ath-MIR169g-p5_2ss7AG19GA	CSS0039110.1	CSS0039110	CSS0039110	protein SUPPRESSOR OF K(+) TRANSPORT GROWTH DEFECT 1-like [Olea europaea var. sylvestris]	272-290	2.5	GO:0005634(nucleus);GO:0007033(vacuole organization);GO:0008568(microtubule-severing ATPase activity);GO:0031122(cytoplasmic microtubule organization)	ko04144(Endocytosis)
ath-MIR169g-p5_2ss7AG19GA	CSS0000928.1	CSS0000928	CSS0000928	protein SUPPRESSOR OF K(+) TRANSPORT GROWTH DEFECT 1-like [Olea europaea var. sylvestris]	272-290	2.5	GO:0005634(nucleus);GO:0007033(vacuole organization);GO:0008568(microtubule-severing ATPase activity);GO:0031122(cytoplasmic microtubule organization)	ko04144(Endocytosis)
ath-MIR169g-p5_2ss7AG19GA	CSS0015678.1	CSS0015678	CSS0015678	Protein phosphatase inhibitor 2 like, partial [Actinidia chinensis var. chinensis]	685-702	2	GO:0000164(protein phosphatase type 1 complex);GO:0004864(protein phosphatase inhibitor activity);GO:0043666(regulation of phosphoprotein phosphatase activity)
ath-MIR169g-p5_2ss7AG19GA	CSS0044451.1	CSS0044451	CSS0044451	Chromosome transmission fidelity protein [Actinidia chinensis var. chinensis]	376-394	2	GO:0005515(protein binding);GO:0005634(nucleus)
ath-MIR169g-p5_2ss7AG19GA	CSS0039374.1	CSS0039374	CSS0039374	Protein phosphatase inhibitor 2 like, partial [Actinidia chinensis var. chinensis]	562-579	2.5	GO:0000164(protein phosphatase type 1 complex);GO:0004864(protein phosphatase inhibitor activity);GO:0043666(regulation of phosphoprotein phosphatase activity)
ath-MIR169g-p5_2ss7AG19GA	CSS0002108.1	CSS0002108	CSS0002108	Low-temperature-induced protein [Actinidia chinensis var. chinensis]	115-133	2.5	GO:0003674(molecular_function);GO:0005737(cytoplasm);GO:0006950(response to stress);GO:0009409(response to cold);GO:0009414(response to water deprivation);GO:0009651(response to salt stress);GO:0009737(response to abscisic acid);GO:0009738(abscisic acid-activated signaling pathway);GO:0010150(leaf senescence)
ath-MIR169g-p5_2ss7AG19GA	CSS0007027.1	CSS0007027	CSS0007027	Low-temperature-induced protein [Actinidia chinensis var. chinensis]	115-133	2.5	GO:0003674(molecular_function);GO:0005737(cytoplasm);GO:0006950(response to stress);GO:0009409(response to cold);GO:0009414(response to water deprivation);GO:0009651(response to salt stress);GO:0009737(response to abscisic acid);GO:0009738(abscisic acid-activated signaling pathway);GO:0010150(leaf senescence)
ath-MIR169g-p5_2ss7AG19GA	CSS0032590.1	CSS0032590	CSS0032590	Mitochondrial import inner membrane translocase subunit TIM17-2 like [Actinidia chinensis var. chinensis]	769-786	2.5	GO:0005744(mitochondrial inner membrane presequence translocase complex);GO:0030150(protein import into mitochondrial matrix);GO:0031305(integral component of mitochondrial inner membrane)
ath-MIR169g-p5_2ss7AG19GA	CSS0026258.1	CSS0026258	CSS0026258	Mitochondrial import inner membrane translocase subunit TIM17-2 like [Actinidia chinensis var. chinensis]	860-877	2.5	GO:0005744(mitochondrial inner membrane presequence translocase complex);GO:0030150(protein import into mitochondrial matrix);GO:0031305(integral component of mitochondrial inner membrane)
ath-MIR169g-p5_2ss7AG19GA	CSS0047795.1	CSS0047795	CSS0047795	U-box domain-containing protein [Actinidia chinensis var. chinensis]	103-122	2	GO:0004672(protein kinase activity);GO:0004842(ubiquitin-protein transferase activity);GO:0005524(ATP binding);GO:0005634(nucleus);GO:0005886(plasma membrane);GO:0006468(protein phosphorylation);GO:0016301(kinase activity);GO:0016567(protein ubiquitination)
ath-MIR169g-p5_2ss7AG19GA	CSS0002355.1	CSS0002355	CSS0002355	GON-4-like protein [Actinidia chinensis var. chinensis]	19-37	2.5	GO:0003674(molecular_function);GO:0005575(cellular_component);GO:0015031(protein transport)
ath-MIR169g-p5_2ss7AG19GA	CSS0005710.1	CSS0005710	CSS0005710	protein RICE SALT SENSITIVE 3-like isoform X1 [Coffea arabica]	1291-1308	2.5	GO:0004674(protein serine/threonine kinase activity);GO:0005829(cytosol);GO:0006468(protein phosphorylation);GO:0035556(intracellular signal transduction)
ath-MIR169g-p5_2ss7AG19GA	CSS0018356.1	CSS0018356	CSS0018356	protein RICE SALT SENSITIVE 3-like isoform X1 [Coffea arabica]	1043-1060	2.5	GO:0004674(protein serine/threonine kinase activity);GO:0005829(cytosol);GO:0006468(protein phosphorylation);GO:0035556(intracellular signal transduction)
ath-MIR169g-p5_2ss7AG19GA	CSS0005955.1	CSS0005955	CSS0005955	protein ELF4-LIKE 1 isoform X1 [Populus trichocarpa]	485-503	2.5	GO:0003674(molecular_function);GO:0005634(nucleus);GO:0042753(positive regulation of circadian rhythm);GO:0048511(rhythmic process)
ath-MIR169g-p5_2ss7AG19GA	CSS0043465.1	CSS0043465	CSS0043465	Inactive receptor kinase [Actinidia chinensis var. chinensis]	183-202	2.5	GO:0004672(protein kinase activity);GO:0004674(protein serine/threonine kinase activity);GO:0005524(ATP binding);GO:0005886(plasma membrane);GO:0006468(protein phosphorylation);GO:0007169(transmembrane receptor protein tyrosine kinase signaling pathway);GO:0016021(integral component of membrane);GO:0016301(kinase activity)
ath-MIR169g-p5_2ss7AG19GA	CSS0047621.1	CSS0047621	CSS0047621	Receptory region, transmembrane domain- and RING domain-containing protein [Actinidia chinensis var. chinensis]	243-261	2.5	GO:0043161(proteasome-mediated ubiquitin-dependent protein catabolic process);GO:0061630(ubiquitin protein ligase activity)
ath-MIR169g-p5_2ss7AG19GA	CSS0047657.1	CSS0047657	CSS0047657	hypothetical protein MIMGU_mgv1a000166mg [Erythranthe guttata]	92-110	2.5	GO:0004674(protein serine/threonine kinase activity);GO:0005886(plasma membrane);GO:0006468(protein phosphorylation);GO:0006952(defense response);GO:0009506(plasmodesma)
ath-MIR169g-p5_2ss7AG19GA	CSS0011909.1	CSS0011909	CSS0011909	U3 small nucleolar RNA-associated protein [Actinidia chinensis var. chinensis]	1010-1027	2.5	GO:0000462(maturation of SSU-rRNA from tricistronic rRNA transcript (SSU-rRNA, 5.8S rRNA, LSU-rRNA));GO:0032040(small-subunit processome);GO:0034388(Pwp2p-containing subcomplex of 90S preribosome)	ko03008(Ribosome biogenesis in eukaryotes)
ath-MIR169g-p5_2ss7AG19GA	CSS0011643.1	CSS0011643	CSS0011643	Formin-like protein [Actinidia chinensis var. chinensis]	172-191	1.5	GO:0003779(actin binding);GO:0005618(cell wall);GO:0005634(nucleus);GO:0005730(nucleolus);GO:0005737(cytoplasm);GO:0005819(spindle);GO:0005886(plasma membrane);GO:0009524(phragmoplast);GO:0016021(integral component of membrane)
ath-MIR169g-p5_2ss7AG19GA	CSS0010694.1	CSS0010694	CSS0010694	Ataxin-7-like protein [Actinidia chinensis var. chinensis]	1144-1161	2	GO:0003674(molecular_function);GO:0005739(mitochondrion);GO:0042538(hyperosmotic salinity response)
ath-MIR169g-p5_2ss7AG19GA	CSS0043919.1	CSS0043919	CSS0043919	hypothetical protein CEY00_Acc30248 [Actinidia chinensis var. chinensis]	70-89	2	GO:0003674(molecular_function);GO:0005634(nucleus);GO:0008150(biological_process)
ath-MIR169g-p5_2ss7AG19GA	CSS0005755.1	CSS0005755	CSS0005755	Retrovirus-related Pol polyprotein from transposon TNT 1-94 [Dendrobium catenatum]	5-23	2	GO:0005739(mitochondrion)	ko04144(Endocytosis)
ath-MIR169g-p5_2ss7AG19GA	CSS0015496.1	CSS0015496	CSS0015496	A-kinase anchor protein like [Actinidia chinensis var. chinensis]	521-539	2	-
ath-MIR169g-p5_2ss7AG19GA	CSS0038180.1	CSS0038180	CSS0038180	Legume lectin domain protein, partial [Actinidia chinensis var. chinensis]	250-267	1.5	GO:0002229(defense response to oomycetes);GO:0004674(protein serine/threonine kinase activity);GO:0005524(ATP binding);GO:0005886(plasma membrane);GO:0006468(protein phosphorylation);GO:0016021(integral component of membrane);GO:0016301(kinase activity);GO:0030246(carbohydrate binding)
ath-MIR169g-p5_2ss7AG19GA	CSS0000189.1	CSS0000189	CSS0000189	PREDICTED: aluminum-activated malate transporter 12 [Theobroma cacao]	746-764	2.5	GO:0009705(plant-type vacuole membrane);GO:0015140(malate transmembrane transporter activity)
ath-MIR169g-p5_2ss7AG19GA	CSS0011982.1	CSS0011982	CSS0011982	IAA-alanine resistance protein [Actinidia chinensis var. chinensis]	451-469	2	GO:0005385(zinc ion transmembrane transporter activity);GO:0006882(cellular zinc ion homeostasis);GO:0071577(zinc II ion transmembrane transport)
ath-MIR169g-p5_2ss7AG19GA	CSS0002654.1	CSS0002654	CSS0002654	zf-Dof domain-containing protein [Cephalotus follicularis]	509-528	1.5	GO:0003677(DNA binding);GO:0003700(DNA binding transcription factor activity);GO:0005634(nucleus);GO:0006351(transcription, DNA-templated);GO:0006355(regulation of transcription, DNA-templated);GO:0043565(sequence-specific DNA binding);GO:0044212(transcription regulatory region DNA binding);GO:0046872(metal ion binding)
ath-MIR169g-p5_2ss7AG19GA	CSS0013529.1	CSS0013529	CSS0013529	uncharacterized protein LOC110408868 [Herrania umbratica]	54-72	0.5	GO:0003674(molecular_function);GO:0005634(nucleus);GO:0009793(embryo development ending in seed dormancy)
ath-MIR169g-p5_2ss7AG19GA	CSS0002145.1	CSS0002145	CSS0002145	LON 2 protease [Vaccinium corymbosum]	3113-3131	2.5	GO:0004176(ATP-dependent peptidase activity);GO:0005782(peroxisomal matrix);GO:0006515(protein quality control for misfolded or incompletely synthesized proteins);GO:0006625(protein targeting to peroxisome);GO:0016485(protein processing)
ath-MIR169g-p5_2ss7AG19GA	CSS0005691.1	CSS0005691	CSS0005691	zf-Dof domain-containing protein [Cephalotus follicularis]	387-406	1.5	GO:0003677(DNA binding);GO:0003700(DNA binding transcription factor activity);GO:0005634(nucleus);GO:0006351(transcription, DNA-templated);GO:0006355(regulation of transcription, DNA-templated);GO:0043565(sequence-specific DNA binding);GO:0044212(transcription regulatory region DNA binding);GO:0046872(metal ion binding)
ath-MIR169g-p5_2ss7AG19GA	CSS0023934.1	CSS0023934	CSS0023934	unnamed protein product, partial [Vitis vinifera]	220-238	2	GO:0005634(nucleus);GO:0006355(regulation of transcription, DNA-templated);GO:0044212(transcription regulatory region DNA binding)	ko04075(Plant hormone signal transduction)
ath-MIR169g-p5_2ss7AG19GA	CSS0032778.1	CSS0032778	CSS0032778	F-box/LRR-repeat protein [Actinidia chinensis var. chinensis]	1324-1342	2.5	GO:0005634(nucleus)
ath-MIR169g-p5_2ss7AG19GA	CSS0023760.1	CSS0023760	CSS0023760	hypothetical protein CK203_087786 [Vitis vinifera]	353-371	2	GO:0003674(molecular_function);GO:0005739(mitochondrion);GO:0008150(biological_process);GO:0016021(integral component of membrane)
ath-MIR169g-p5_2ss7AG19GA	CSS0044504.1	CSS0044504	CSS0044504	Protein IDA-LIKE 2 like [Actinidia chinensis var. chinensis]	260-278	2.5	GO:0005576(extracellular region);GO:0005615(extracellular space);GO:0010227(floral organ abscission)
ath-MIR169g-p5_2ss7AG19GA	CSS0004703.1	CSS0004703	CSS0004703	hypothetical protein CK203_087786 [Vitis vinifera]	353-371	2	GO:0003674(molecular_function);GO:0005739(mitochondrion);GO:0008150(biological_process);GO:0016021(integral component of membrane)
ath-MIR169g-p5_2ss7AG19GA	CSS0049068.1	CSS0049068	CSS0049068	Systemin receptor like [Actinidia chinensis var. chinensis]	148-167	2.5	GO:0004672(protein kinase activity);GO:0004674(protein serine/threonine kinase activity);GO:0004714(transmembrane receptor protein tyrosine kinase activity);GO:0005496(steroid binding);GO:0005515(protein binding);GO:0005524(ATP binding);GO:0005768(endosome);GO:0005886(plasma membrane);GO:0009506(plasmodesma);GO:0009729(detection of brassinosteroid stimulus);GO:0009742(brassinosteroid mediated sig…	ko04075(Plant hormone signal transduction)
ath-MIR169g-p5_2ss7AG19GA	CSS0046858.1	CSS0046858	CSS0046858	Multidrug resistance protein [Actinidia chinensis var. chinensis]	294-312	2.5	GO:0005351(carbohydrate:proton symporter activity);GO:0005739(mitochondrion);GO:0015144(carbohydrate transmembrane transporter activity);GO:0016020(membrane);GO:0016021(integral component of membrane);GO:0055085(transmembrane transport)
ath-MIR169g-p5_2ss7AG19GA	CSS0046858.1	CSS0046858	CSS0046858	Multidrug resistance protein [Actinidia chinensis var. chinensis]	66-85	2.5	GO:0005351(carbohydrate:proton symporter activity);GO:0005739(mitochondrion);GO:0015144(carbohydrate transmembrane transporter activity);GO:0016020(membrane);GO:0016021(integral component of membrane);GO:0055085(transmembrane transport)
ath-MIR169g-p5_2ss7AG19GA	CSS0004133.1	CSS0004133	CSS0004133	unnamed protein product, partial [Vitis vinifera]	304-322	2.5	GO:0005634(nucleus);GO:0006355(regulation of transcription, DNA-templated);GO:0044212(transcription regulatory region DNA binding)	ko04075(Plant hormone signal transduction)
ath-MIR169g-p5_2ss7AG19GA	CSS0020543.1	CSS0020543	CSS0020543	Cytochrome P450 90B1 like [Actinidia chinensis var. chinensis]	1382-1399	1.5	GO:0004497(monooxygenase activity);GO:0005783(endoplasmic reticulum);GO:0007275(multicellular organism development);GO:0010268(brassinosteroid homeostasis);GO:0016125(sterol metabolic process);GO:0016132(brassinosteroid biosynthetic process)	ko00905(Brassinosteroid biosynthesis)
ath-MIR169g-p5_2ss7AG19GA	CSS0019913.1	CSS0019913	CSS0019913	Transcription factor like [Actinidia chinensis var. chinensis]	236-254	1.5	GO:0000981(RNA polymerase II transcription factor activity, sequence-specific DNA binding);GO:0001135(transcription factor activity, RNA polymerase II transcription factor recruiting);GO:0003677(DNA binding);GO:0003682(chromatin binding);GO:0003700(DNA binding transcription factor activity);GO:0005515(protein binding);GO:0005634(nucleus);GO:0006351(transcription, DNA-templated);GO:0006355(regulat…
ath-MIR169g-p5_2ss7AG19GA	CSS0020023.1	CSS0020023	CSS0020023	PREDICTED: WD repeat-containing protein 20 homolog [Solanum tuberosum]	417-435	2	GO:0000166(nucleotide binding);GO:0008150(biological_process);GO:0009507(chloroplast)	ko03008(Ribosome biogenesis in eukaryotes);ko04712(Circadian rhythm - plant)
ath-MIR169g-p5_2ss7AG19GA	CSS0003679.1	CSS0003679	CSS0003679	RHOMBOID-like protein [Actinidia chinensis var. chinensis]	641-660	2.5	GO:0004252(serine-type endopeptidase activity);GO:0016485(protein processing)	ko00510(N-Glycan biosynthesis)
ath-MIR169g-p5_2ss7AG19GA	CSS0021529.1	CSS0021529	CSS0021529	RHOMBOID-like protein [Actinidia chinensis var. chinensis]	926-945	2.5	GO:0004252(serine-type endopeptidase activity);GO:0016485(protein processing)	ko00510(N-Glycan biosynthesis)
ath-MIR169g-p5_2ss7AG19GA	CSS0046385.1	CSS0046385	CSS0046385	unnamed protein product, partial [Vitis vinifera]	1045-1062	2.5	GO:0000783(nuclear telomere cap complex);GO:0010521(telomerase inhibitor activity);GO:0016233(telomere capping);GO:0032210(regulation of telomere maintenance via telomerase);GO:0051974(negative regulation of telomerase activity);GO:0098505(G-rich strand telomeric DNA binding)
ath-MIR169g-p5_2ss7AG19GA	CSS0037973.1	CSS0037973	CSS0037973	PREDICTED: claspin-like [Nicotiana tomentosiformis]	335-353	2.5	-
ath-MIR169g-p5_2ss7AG19GA	CSS0016764.1	CSS0016764	CSS0016764	Beta-D-xylosidase [Actinidia chinensis var. chinensis]	106-124	2.5	GO:0009044(xylan 1,4-beta-xylosidase activity);GO:0009505(plant-type cell wall);GO:0031222(arabinan catabolic process);GO:0045493(xylan catabolic process);GO:0046556(alpha-L-arabinofuranosidase activity)	ko00520(Amino sugar and nucleotide sugar metabolism)
ath-MIR169g-p5_2ss7AG19GA	CSS0006976.1	CSS0006976	CSS0006976	E3 ubiquitin-protein ligase RHA2B-like [Herrania umbratica]	415-433	1	GO:0043161(proteasome-mediated ubiquitin-dependent protein catabolic process);GO:0061630(ubiquitin protein ligase activity)
ath-MIR169g-p5_2ss7AG19GA	CSS0020246.1	CSS0020246	CSS0020246	E3 ubiquitin-protein ligase RHA2B-like [Herrania umbratica]	429-447	1	GO:0043161(proteasome-mediated ubiquitin-dependent protein catabolic process);GO:0061630(ubiquitin protein ligase activity)
ath-MIR169g-p5_2ss7AG19GA	CSS0017232.1	CSS0017232	CSS0017232	Splicing factor 3B subunit like [Actinidia chinensis var. chinensis]	133-151	2.5	GO:0003674(molecular_function);GO:0005634(nucleus);GO:0008150(biological_process)
ath-MIR169g-p5_2ss7AG19GA	CSS0032185.1	CSS0032185	CSS0032185	glucuronoxylan 4-O-methyltransferase 3 [Manihot esculenta]	27-45	2.5	GO:0000139(Golgi membrane);GO:0005739(mitochondrion);GO:0005794(Golgi apparatus);GO:0005976(polysaccharide metabolic process);GO:0009808(lignin metabolic process);GO:0016021(integral component of membrane);GO:0030775(glucuronoxylan 4-O-methyltransferase activity);GO:0032259(methylation);GO:0045491(xylan metabolic process);GO:0045492(xylan biosynthetic process)
ath-MIR169g-p5_2ss7AG19GA	CSS0034271.1	CSS0034271	CSS0034271	Transcription factor like [Actinidia chinensis var. chinensis]	635-652	2	GO:0000981(RNA polymerase II transcription factor activity, sequence-specific DNA binding);GO:0001135(transcription factor activity, RNA polymerase II transcription factor recruiting);GO:0003677(DNA binding);GO:0003700(DNA binding transcription factor activity);GO:0005634(nucleus);GO:0006355(regulation of transcription, DNA-templated);GO:0006357(regulation of transcription by RNA polymerase II);G…
ath-MIR169g-p5_2ss7AG19GA	CSS0013399.1	CSS0013399	CSS0013399	DnaJ subfamily B member like [Actinidia chinensis var. chinensis]	60-79	2.5	GO:0005737(cytoplasm);GO:0006457(protein folding);GO:0051082(unfolded protein binding)
ath-MIR169g-p5_2ss7AG19GA	CSS0040839.1	CSS0040839	CSS0040839	Expansin-A13 like [Actinidia chinensis var. chinensis]	104-122	2.5	GO:0005576(extracellular region);GO:0005618(cell wall);GO:0009664(plant-type cell wall organization);GO:0009826(unidimensional cell growth);GO:0009828(plant-type cell wall loosening);GO:0009831(plant-type cell wall modification involved in multidimensional cell growth);GO:0016020(membrane)
ath-MIR169g-p5_2ss7AG19GA	CSS0018547.1	CSS0018547	CSS0018547	PLASMODESMATA CALLOSE-BINDING PROTEIN 5 like, partial [Actinidia chinensis var. chinensis]	252-270	2.5	GO:0004553(hydrolase activity, hydrolyzing O-glycosyl compounds);GO:0030247(polysaccharide binding);GO:0046658(anchored component of plasma membrane)	ko00500(Starch and sucrose metabolism)
ath-MIR169g-p5_2ss7AG19GA	CSS0022368.1	CSS0022368	CSS0022368	uncharacterized protein LOC111369523 [Olea europaea var. sylvestris]	1-18	2.5	GO:0003674(molecular_function);GO:0005739(mitochondrion);GO:0006886(intracellular protein transport);GO:0006888(ER to Golgi vesicle-mediated transport);GO:0016021(integral component of membrane)
ath-MIR169g-p5_2ss7AG19GA	CSS0048511.1	CSS0048511	CSS0048511	hypothetical protein CEY00_Acc01165 [Actinidia chinensis var. chinensis]	726-743	2	GO:0000981(RNA polymerase II transcription factor activity, sequence-specific DNA binding);GO:0001135(transcription factor activity, RNA polymerase II transcription factor recruiting);GO:0003677(DNA binding);GO:0003700(DNA binding transcription factor activity);GO:0005634(nucleus);GO:0006355(regulation of transcription, DNA-templated);GO:0006357(regulation of transcription by RNA polymerase II);G…
ath-MIR169g-p5_2ss7AG19GA	CSS0038762.1	CSS0038762	CSS0038762	hypothetical protein DM860_016030 [Cuscuta australis]	101-119	2.5	GO:0001735(prenylcysteine oxidase activity);GO:0005774(vacuolar membrane);GO:0030327(prenylated protein catabolic process);GO:0030328(prenylcysteine catabolic process)	ko00900(Terpenoid backbone biosynthesis)
ath-MIR169g-p5_2ss7AG19GA	CSS0029909.1	CSS0029909	CSS0029909	PREDICTED: uncharacterized protein LOC109156985 [Ipomoea nil]	137-156	2	GO:0003674(molecular_function);GO:0005576(extracellular region);GO:0008150(biological_process);GO:0016021(integral component of membrane)
ath-MIR169g-p5_2ss7AG19GA	CSS0039604.1	CSS0039604	CSS0039604	Myb-related protein 308 [Glycine soja]	660-678	2.5	GO:0000981(RNA polymerase II transcription factor activity, sequence-specific DNA binding);GO:0001135(transcription factor activity, RNA polymerase II transcription factor recruiting);GO:0003677(DNA binding);GO:0003700(DNA binding transcription factor activity);GO:0005515(protein binding);GO:0005634(nucleus);GO:0006351(transcription, DNA-templated);GO:0006355(regulation of transcription, DNA-temp…
ath-MIR169g-p5_2ss7AG19GA	CSS0035334.1	CSS0035334	CSS0035334	PREDICTED: uncharacterized protein LOC109156985 [Ipomoea nil]	80-99	2	GO:0003674(molecular_function);GO:0005576(extracellular region);GO:0008150(biological_process);GO:0016021(integral component of membrane)
ath-MIR169g-p5_2ss7AG19GA	CSS0006188.1	CSS0006188	CSS0006188	Myb-related protein 308 [Glycine soja]	640-658	2.5	GO:0000981(RNA polymerase II transcription factor activity, sequence-specific DNA binding);GO:0001135(transcription factor activity, RNA polymerase II transcription factor recruiting);GO:0003677(DNA binding);GO:0003700(DNA binding transcription factor activity);GO:0005515(protein binding);GO:0005634(nucleus);GO:0006351(transcription, DNA-templated);GO:0006355(regulation of transcription, DNA-temp…
ath-MIR169g-p5_2ss7AG19GA	CSS0018285.1	CSS0018285	CSS0018285	PREDICTED: B2 protein [Theobroma cacao]	893-911	2	GO:0005515(protein binding);GO:0005634(nucleus);GO:0005737(cytoplasm)
ath-MIR169g-p5_2ss7AG19GA	CSS0045258.1	CSS0045258	CSS0045258	PREDICTED: B2 protein [Theobroma cacao]	888-906	2	GO:0005515(protein binding);GO:0005634(nucleus);GO:0005737(cytoplasm)
ath-MIR169g-p5_2ss7AG19GA	CSS0016555.1	CSS0016555	CSS0016555	putative protein kinase RLK-Pelle-LRR-XII-1 family [Rosa chinensis]	75-94	2.5	GO:0004672(protein kinase activity);GO:0005886(plasma membrane)
ath-MIR169g-p5_2ss7AG19GA	CSS0037749.1	CSS0037749	CSS0037749	Ferritin like [Actinidia chinensis var. chinensis]	63-80	2	GO:0000302(response to reactive oxygen species);GO:0004322(ferroxidase activity);GO:0005506(iron ion binding);GO:0005737(cytoplasm);GO:0005739(mitochondrion);GO:0006826(iron ion transport);GO:0006879(cellular iron ion homeostasis);GO:0006880(intracellular sequestering of iron ion);GO:0008199(ferric iron binding);GO:0009409(response to cold);GO:0009507(chloroplast);GO:0009535(chloroplast thylakoid…
ath-MIR169g-p5_2ss7AG19GA	CSS0039005.1	CSS0039005	CSS0039005	dof zinc finger protein DOF4.6-like isoform X1 [Hevea brasiliensis]	454-471	2	GO:0003677(DNA binding);GO:0003700(DNA binding transcription factor activity);GO:0005634(nucleus);GO:0006351(transcription, DNA-templated);GO:0006355(regulation of transcription, DNA-templated);GO:0046872(metal ion binding)
ath-MIR169g-p5_2ss7AG19GA	CSS0037047.1	CSS0037047	CSS0037047	Ferritin like [Actinidia chinensis var. chinensis]	66-83	2	GO:0000302(response to reactive oxygen species);GO:0004322(ferroxidase activity);GO:0005506(iron ion binding);GO:0005737(cytoplasm);GO:0005739(mitochondrion);GO:0006826(iron ion transport);GO:0006879(cellular iron ion homeostasis);GO:0006880(intracellular sequestering of iron ion);GO:0008199(ferric iron binding);GO:0009409(response to cold);GO:0009507(chloroplast);GO:0009535(chloroplast thylakoid…
ath-MIR169g-p5_2ss7AG19GA	CSS0042264.1	CSS0042264	CSS0042264	PREDICTED: probable serine/threonine-protein kinase Cx32, chloroplastic isoform X2 [Nicotiana attenuata]	1411-1428	2	GO:0004675(transmembrane receptor protein serine/threonine kinase activity);GO:0005524(ATP binding);GO:0005634(nucleus);GO:0005886(plasma membrane);GO:0006468(protein phosphorylation);GO:0006952(defense response);GO:0007166(cell surface receptor signaling pathway);GO:0009507(chloroplast);GO:0016301(kinase activity)
ath-MIR169g-p5_2ss7AG19GA	CSS0002500.1	CSS0002500	CSS0002500	Serine/threonine-protein phosphatase 7 long form like [Actinidia chinensis var. chinensis]	1287-1305	2.5	GO:0005634(nucleus);GO:0008150(biological_process)
ath-MIR169g-p5_2ss7AG19GA	CSS0014815.1	CSS0014815	CSS0014815	Serine/threonine-protein phosphatase 7 long form like [Actinidia chinensis var. chinensis]	1162-1180	2.5	GO:0005634(nucleus);GO:0008150(biological_process)
ath-MIR169g-p5_2ss7AG19GA	CSS0016709.1	CSS0016709	CSS0016709	uncharacterized protein LOC113695793 isoform X2 [Coffea arabica]	168-186	2.5	GO:0003746(translation elongation factor activity);GO:0006414(translational elongation);GO:0009507(chloroplast);GO:0009570(chloroplast stroma)
ath-MIR169g-p5_2ss7AG19GA	CSS0050163.1	CSS0050163	CSS0050163	PREDICTED: proteasome subunit alpha type-7 [Vitis vinifera]	149-167	2	GO:0000502(proteasome complex);GO:0004298(threonine-type endopeptidase activity);GO:0005634(nucleus);GO:0005737(cytoplasm);GO:0005773(vacuole);GO:0005839(proteasome core complex);GO:0006511(ubiquitin-dependent protein catabolic process);GO:0008233(peptidase activity);GO:0009507(chloroplast);GO:0019773(proteasome core complex, alpha-subunit complex)	ko03050(Proteasome)
ath-MIR169g-p5_2ss7AG19GA	CSS0006704.1	CSS0006704	CSS0006704	uncharacterized protein LOC113695793 isoform X1 [Coffea arabica]	50-68	2	GO:0003746(translation elongation factor activity);GO:0006414(translational elongation);GO:0009507(chloroplast);GO:0009570(chloroplast stroma)
ath-MIR169g-p5_2ss7AG19GA	CSS0002084.1	CSS0002084	CSS0002084	hypothetical protein COLO4_21914 [Corchorus olitorius]	180-197	2	-
ath-MIR169g-p5_2ss7AG19GA	CSS0007793.1	CSS0007793	CSS0007793	PREDICTED: LOB domain-containing protein 6 [Prunus mume]	8-26	2.5	GO:0005515(protein binding);GO:0005634(nucleus);GO:0005654(nucleoplasm);GO:0009799(specification of symmetry);GO:0009943(adaxial/abaxial axis specification);GO:0009944(polarity specification of adaxial/abaxial axis);GO:0009954(proximal/distal pattern formation);GO:0048441(petal development)
ath-MIR169g-p5_2ss7AG19GA	CSS0009291.1	CSS0009291	CSS0009291	PREDICTED: putative disease resistance protein RGA4, partial [Cucumis melo]	238-256	2	-
ath-MIR169g-p5_2ss7AG19GA	CSS0004149.1	CSS0004149	CSS0004149	Protein LURP-one-related like [Actinidia chinensis var. chinensis]	429-446	2.5	GO:0006952(defense response)
ath-MIR169g-p5_2ss7AG19GA	CSS0022020.1	CSS0022020	CSS0022020	Caffeoylshikimate esterase [Actinidia chinensis var. chinensis]	2739-2758	2.5	GO:0006629(lipid metabolic process);GO:0016020(membrane);GO:0016298(lipase activity)	ko00561(Glycerolipid metabolism)
ath-MIR169g-p5_2ss7AG19GA	CSS0023663.1	CSS0023663	CSS0023663	G-type lectin S-receptor-like serine/threonine-protein kinase [Actinidia chinensis var. chinensis]	1241-1259	2.5	GO:0004674(protein serine/threonine kinase activity);GO:0005886(plasma membrane);GO:0006468(protein phosphorylation)
ath-MIR169g-p5_2ss7AG19GA	CSS0045656.1	CSS0045656	CSS0045656	ALA-interacting subunit like [Actinidia chinensis var. chinensis]	170-188	1.5	GO:0000139(Golgi membrane);GO:0005789(endoplasmic reticulum membrane);GO:0005794(Golgi apparatus);GO:0015914(phospholipid transport);GO:0016020(membrane);GO:0016021(integral component of membrane);GO:0031902(late endosome membrane)
ath-MIR169g-p5_2ss7AG19GA	CSS0035810.1	CSS0035810	CSS0035810	Mitogen-activated protein kinase [Actinidia chinensis var. chinensis]	61-80	2.5	-	ko04016(MAPK signaling pathway - plant)
ath-MIR169g-p5_2ss7AG19GA	CSS0037425.1	CSS0037425	CSS0037425	hypothetical protein CEY00_Acc20887 [Actinidia chinensis var. chinensis]	886-904	2.5	GO:0008150(biological_process);GO:0016020(membrane)	ko00620(Pyruvate metabolism)
ath-MIR169g-p5_2ss7AG19GA	CSS0015855.1	CSS0015855	CSS0015855	Mitogen-activated protein kinase [Actinidia chinensis var. chinensis]	128-147	2	GO:0004707(MAP kinase activity);GO:0005524(ATP binding);GO:0005634(nucleus);GO:0005737(cytoplasm);GO:0007165(signal transduction);GO:0010468(regulation of gene expression);GO:0016301(kinase activity)	ko04016(MAPK signaling pathway - plant)
ath-MIR169g-p5_2ss7AG19GA	CSS0030628.1	CSS0030628	CSS0030628	protein SUPPRESSOR OF K(+) TRANSPORT GROWTH DEFECT 1-like [Olea europaea var. sylvestris]	272-290	2.5	GO:0005634(nucleus);GO:0007033(vacuole organization);GO:0008568(microtubule-severing ATPase activity);GO:0031122(cytoplasmic microtubule organization)	ko04144(Endocytosis)
ath-MIR169g-p5_2ss7AG19GA	CSS0037884.1	CSS0037884	CSS0037884	Peptidyl-tRNA hydrolase [Actinidia chinensis var. chinensis]	27-44	2	GO:0004045(aminoacyl-tRNA hydrolase activity);GO:0005739(mitochondrion);GO:0032543(mitochondrial translation)
ath-MIR169g-p5_2ss7AG19GA	CSS0007538.1	CSS0007538	CSS0007538	RING-H2 finger protein ATL70-like [Manihot esculenta]	88-105	2.5	GO:0043161(proteasome-mediated ubiquitin-dependent protein catabolic process);GO:0061630(ubiquitin protein ligase activity)
ath-MIR169g-p5_2ss7AG19GA	CSS0014600.1	CSS0014600	CSS0014600	Beta-D-xylosidase [Actinidia chinensis var. chinensis]	48-66	2.5	GO:0009044(xylan 1,4-beta-xylosidase activity);GO:0009505(plant-type cell wall);GO:0031222(arabinan catabolic process);GO:0045493(xylan catabolic process);GO:0046556(alpha-L-arabinofuranosidase activity)	ko00520(Amino sugar and nucleotide sugar metabolism)
ath-MIR169g-p5_2ss7AG19GA	CSS0009108.1	CSS0009108	CSS0009108	Beta-D-xylosidase [Actinidia chinensis var. chinensis]	68-86	2.5	GO:0009044(xylan 1,4-beta-xylosidase activity);GO:0009505(plant-type cell wall);GO:0031222(arabinan catabolic process);GO:0045493(xylan catabolic process);GO:0046556(alpha-L-arabinofuranosidase activity)	ko00520(Amino sugar and nucleotide sugar metabolism)
ath-MIR169g-p5_2ss7AG19GA	CSS0049699.1	CSS0049699	CSS0049699	COMPASS-like H3K4 histone methylase component WDR5A [Vitis vinifera]	43-61	2.5	GO:0000166(nucleotide binding);GO:0005634(nucleus);GO:0005834(heterotrimeric G-protein complex);GO:0008150(biological_process);GO:0080008(Cul4-RING E3 ubiquitin ligase complex)
ath-MIR169g-p5_2ss7AG19GA	CSS0045116.1	CSS0045116	CSS0045116	copper transport protein ATOX1 [Hevea brasiliensis]	54-72	2.5	GO:0005737(cytoplasm);GO:0030001(metal ion transport);GO:0046914(transition metal ion binding);GO:0046916(cellular transition metal ion homeostasis)
ath-MIR169g-p5_2ss7AG19GA	CSS0041224.1	CSS0041224	CSS0041224	Cytochrome c oxidase subunit 6a like [Actinidia chinensis var. chinensis]	356-374	2.5	GO:0004129(cytochrome-c oxidase activity);GO:0005739(mitochondrion);GO:0005751(mitochondrial respiratory chain complex IV);GO:0016021(integral component of membrane)	ko00190(Oxidative phosphorylation)
ath-MIR169g-p5_2ss7AG19GA	CSS0047057.1	CSS0047057	CSS0047057	Cytochrome c oxidase subunit 6a like [Actinidia chinensis var. chinensis]	424-442	2.5	GO:0004129(cytochrome-c oxidase activity);GO:0005739(mitochondrion);GO:0005751(mitochondrial respiratory chain complex IV);GO:0016021(integral component of membrane)	ko00190(Oxidative phosphorylation)
ath-MIR169g-p5_2ss7AG19GA	CSS0010803.1	CSS0010803	CSS0010803	RING finger and transmembrane domain-containing protein [Actinidia chinensis var. chinensis]	77-94	2	GO:0008270(zinc ion binding);GO:0016021(integral component of membrane)
ath-MIR169g-p5_2ss7AG19GA	CSS0037186.1	CSS0037186	CSS0037186	LRR receptor-like serine/threonine-protein kinase precursor [Actinidia chinensis var. chinensis]	87-106	2.5	GO:0004674(protein serine/threonine kinase activity);GO:0005524(ATP binding);GO:0005886(plasma membrane);GO:0006468(protein phosphorylation);GO:0007169(transmembrane receptor protein tyrosine kinase signaling pathway);GO:0009507(chloroplast);GO:0016021(integral component of membrane);GO:0016301(kinase activity)
ath-MIR169g-p5_2ss7AG19GA	CSS0001712.1	CSS0001712	CSS0001712	protein SHORT-ROOT [Coffea eugenioides]	34-52	2	GO:0003700(DNA binding transcription factor activity);GO:0005634(nucleus);GO:0006355(regulation of transcription, DNA-templated);GO:0008356(asymmetric cell division);GO:0009956(radial pattern formation);GO:0043565(sequence-specific DNA binding);GO:0045930(negative regulation of mitotic cell cycle);GO:0048366(leaf development);GO:0055072(iron ion homeostasis)	ko04075(Plant hormone signal transduction)
ath-MIR169g-p5_2ss7AG19GA	CSS0002661.1	CSS0002661	CSS0002661	unnamed protein product, partial [Vitis vinifera]	1407-1425	2	GO:0005575(cellular_component);GO:0008150(biological_process);GO:0016740(transferase activity)
ath-MIR169g-p5_2ss7AG19GA	CSS0010094.1	CSS0010094	CSS0010094	WUSCHEL-related homeobox 11-like [Hevea brasiliensis]	419-436	2	GO:0003677(DNA binding);GO:0003700(DNA binding transcription factor activity);GO:0005634(nucleus);GO:0006351(transcription, DNA-templated);GO:0006355(regulation of transcription, DNA-templated);GO:0048830(adventitious root development)
ath-MIR169g-p5_2ss7AG19GA	CSS0044358.1	CSS0044358	CSS0044358	Valine--tRNA ligase [Actinidia chinensis var. chinensis]	894-913	2.5	GO:0003674(molecular_function);GO:0005634(nucleus);GO:0008150(biological_process)
ath-MIR169g-p5_2ss7AG19GA	CSS0033946.1	CSS0033946	CSS0033946	Serine-rich adhesin for platelets like [Actinidia chinensis var. chinensis]	3791-3809	2.5	GO:0006368(transcription elongation from RNA polymerase II promoter);GO:0070449(elongin complex)
ath-MIR169g-p5_2ss7AG19GA	CSS0004634.1	CSS0004634	CSS0004634	cationic amino acid transporter 2 [Camellia sinensis]	76-95	2.5	GO:0005887(integral component of plasma membrane);GO:0015179(L-amino acid transmembrane transporter activity);GO:0015297(antiporter activity)
ath-MIR169g-p5_2ss7AG19GA	CSS0033902.1	CSS0033902	CSS0033902	Prolycopene isomerase [Actinidia chinensis var. chinensis]	2141-2158	2.5	GO:0009507(chloroplast);GO:0009662(etioplast organization);GO:0016117(carotenoid biosynthetic process);GO:0016491(oxidoreductase activity);GO:0031969(chloroplast membrane);GO:0046608(carotenoid isomerase activity);GO:0055114(oxidation-reduction process)	ko00906(Carotenoid biosynthesis)
ath-MIR169g-p5_2ss7AG19GA	CSS0001500.1	CSS0001500	CSS0001500	PREDICTED: uncharacterized protein LOC104605635 [Nelumbo nucifera]	63-81	2	GO:0005737(cytoplasm);GO:0008757(S-adenosylmethionine-dependent methyltransferase activity);GO:0032259(methylation)
ath-MIR169g-p5_2ss7AG19GA	CSS0008325.1	CSS0008325	CSS0008325	probable disease resistance protein At4g27220 [Quercus suber]	2885-2904	2	GO:0005524(ATP binding);GO:0005739(mitochondrion);GO:0006952(defense response);GO:0043531(ADP binding)	ko04626(Plant-pathogen interaction)
ath-MIR169g-p5_2ss7AG19GA	CSS0008325.1	CSS0008325	CSS0008325	probable disease resistance protein At4g27220 [Quercus suber]	2865-2883	2.5	GO:0005524(ATP binding);GO:0005739(mitochondrion);GO:0006952(defense response);GO:0043531(ADP binding)	ko04626(Plant-pathogen interaction)
ath-MIR169g-p5_2ss7AG19GA	CSS0012394.1	CSS0012394	CSS0012394	Ubiquitin-conjugating enzyme like [Actinidia chinensis var. chinensis]	148-166	2.5	GO:0000209(protein polyubiquitination);GO:0005634(nucleus);GO:0005737(cytoplasm);GO:0030071(regulation of mitotic metaphase/anaphase transition);GO:0031145(anaphase-promoting complex-dependent catabolic process);GO:0031625(ubiquitin protein ligase binding);GO:0061630(ubiquitin protein ligase activity)	ko04120(Ubiquitin mediated proteolysis)
ath-MIR169g-p5_2ss7AG19GA	CSS0018332.2	CSS0018332	CSS0018332	Pheophytinase [Actinidia chinensis var. chinensis]	193-211	2.5	GO:0016787(hydrolase activity)
ath-MIR169g-p5_2ss7AG19GA	CSS0010239.1	CSS0010239	CSS0010239	L-2-hydroxyglutarate dehydrogenase [Actinidia chinensis var. chinensis]	65-83	2.5	GO:0003973((S)-2-hydroxy-acid oxidase activity);GO:0005739(mitochondrion);GO:0016491(oxidoreductase activity);GO:0047545(2-hydroxyglutarate dehydrogenase activity);GO:0055114(oxidation-reduction process);GO:0071949(FAD binding)	ko00650(Butanoate metabolism)
ath-MIR169g-p5_2ss7AG19GA	CSS0023677.1	CSS0023677	CSS0023677	PREDICTED: WD repeat-containing protein 20 [Vitis vinifera]	94-112	2.5	GO:0000166(nucleotide binding);GO:0008150(biological_process);GO:0009507(chloroplast)	ko03008(Ribosome biogenesis in eukaryotes);ko04712(Circadian rhythm - plant)
ath-MIR169g-p5_2ss7AG19GA	CSS0031139.1	CSS0031139	CSS0031139	Protein FAR1-RELATED SEQUENCE 10 [Actinidia chinensis var. chinensis]	136-155	2.5	GO:0005634(nucleus);GO:0006355(regulation of transcription, DNA-templated);GO:0008270(zinc ion binding);GO:0009639(response to red or far red light)
ath-MIR169g-p5_2ss7AG19GA	CSS0042957.1	CSS0042957	CSS0042957	Galacturonosyltransferase [Actinidia chinensis var. chinensis]	177-195	2.5	GO:0000139(Golgi membrane);GO:0005768(endosome);GO:0005794(Golgi apparatus);GO:0005802(trans-Golgi network);GO:0016021(integral component of membrane);GO:0016051(carbohydrate biosynthetic process);GO:0016757(transferase activity, transferring glycosyl groups);GO:0045489(pectin biosynthetic process);GO:0047262(polygalacturonate 4-alpha-galacturonosyltransferase activity);GO:0071555(cell wall organ…	ko00520(Amino sugar and nucleotide sugar metabolism)
ath-MIR169g-p5_2ss7AG19GA	CSS0003572.1	CSS0003572	CSS0003572	RING finger and transmembrane domain-containing protein [Actinidia chinensis var. chinensis]	173-190	2	GO:0008270(zinc ion binding);GO:0016021(integral component of membrane)
ath-MIR169g-p5_2ss7AG19GA	CSS0047140.1	CSS0047140	CSS0047140	hypothetical protein A4A49_39381 [Nicotiana attenuata]	63-80	2	GO:0005739(mitochondrion);GO:0008270(zinc ion binding);GO:0016020(membrane);GO:0097250(mitochondrial respiratory chain supercomplex assembly)
ath-MIR169g-p5_2ss7AG19GA	CSS0037478.1	CSS0037478	CSS0037478	Protein ENDOSPERM DEFECTIVE like [Actinidia chinensis var. chinensis]	386-403	2.5	GO:0000226(microtubule cytoskeleton organization);GO:0005634(nucleus);GO:0005737(cytoplasm);GO:0005813(centrosome);GO:0005880(nuclear microtubule);GO:0008017(microtubule binding);GO:0009960(endosperm development);GO:0010342(endosperm cellularization);GO:0048316(seed development);GO:0051301(cell division)
ath-MIR169g-p5_2ss7AG19GA	CSS0032678.1	CSS0032678	CSS0032678	Plant-specific TFIIB-related protein [Actinidia chinensis var. chinensis]	1620-1638	2.5	GO:0001093(TFIIB-class transcription factor binding);GO:0003690(double-stranded DNA binding);GO:0005515(protein binding);GO:0005634(nucleus);GO:0006355(regulation of transcription, DNA-templated);GO:0009793(embryo development ending in seed dormancy);GO:0009846(pollen germination);GO:0042803(protein homodimerization activity);GO:0046872(metal ion binding);GO:0070063(RNA polymerase binding);GO:007…
ath-MIR169g-p5_2ss7AG19GA	CSS0045401.1	CSS0045401	CSS0045401	E3 ubiquitin-protein like [Actinidia chinensis var. chinensis]	144-162	2.5	GO:0043161(proteasome-mediated ubiquitin-dependent protein catabolic process);GO:0061630(ubiquitin protein ligase activity)
ath-MIR169g-p5_2ss7AG19GA	CSS0034442.1	CSS0034442	CSS0034442	PREDICTED: F-box protein At3g07870-like [Ipomoea nil]	291-309	2.5	GO:0004842(ubiquitin-protein transferase activity);GO:0019005(SCF ubiquitin ligase complex);GO:0031146(SCF-dependent proteasomal ubiquitin-dependent protein catabolic process)	ko04141(Protein processing in endoplasmic reticulum);ko04626(Plant-pathogen interaction)
ath-MIR169g-p5_2ss7AG19GA	CSS0014695.1	CSS0014695	CSS0014695	PREDICTED: 28 kDa ribonucleoprotein, chloroplastic-like [Nelumbo nucifera]	257-275	2	GO:0003723(RNA binding);GO:0003729(mRNA binding);GO:0006396(RNA processing);GO:0006397(mRNA processing);GO:0008266(poly(U) RNA binding);GO:0009409(response to cold);GO:0009451(RNA modification);GO:0009507(chloroplast);GO:0009535(chloroplast thylakoid membrane);GO:0009570(chloroplast stroma);GO:0009579(thylakoid);GO:0009631(cold acclimation);GO:0009941(chloroplast envelope);GO:0016553(base convers…
ath-MIR169g-p5_2ss7AG19GA	CSS0018901.1	CSS0018901	CSS0018901	ras-related protein RABB1b [Hevea brasiliensis]	100-118	2.5	GO:0003924(GTPase activity);GO:0005525(GTP binding);GO:0005622(intracellular);GO:0005623(cell);GO:0005737(cytoplasm);GO:0005768(endosome);GO:0005773(vacuole);GO:0005794(Golgi apparatus);GO:0005886(plasma membrane);GO:0006888(ER to Golgi vesicle-mediated transport);GO:0015031(protein transport);GO:0016020(membrane);GO:0030100(regulation of endocytosis)
ath-MIR169g-p5_2ss7AG19GA	CSS0018376.1	CSS0018376	CSS0018376	EPIDERMAL PATTERNING FACTOR-like protein 8 [Glycine max]	255-272	2	GO:0010052(guard cell differentiation)
ath-MIR169g-p5_2ss7AG19GA	CSS0037009.1	CSS0037009	CSS0037009	26.5 kDa heat shock protein, mitochondrial [Manihot esculenta]	119-137	2	GO:0003674(molecular_function);GO:0005739(mitochondrion);GO:0009408(response to heat);GO:0009507(chloroplast);GO:0009644(response to high light intensity);GO:0042542(response to hydrogen peroxide)	ko04141(Protein processing in endoplasmic reticulum)
ath-MIR169g-p5_2ss7AG19GA	CSS0019076.1	CSS0019076	CSS0019076	Hypothetical protein [Arabidopsis thaliana]	1268-1286	2.5	GO:0004596(peptide alpha-N-acetyltransferase activity);GO:0005737(cytoplasm);GO:0017196(N-terminal peptidyl-methionine acetylation)	ko00230(Purine metabolism);ko00240(Pyrimidine metabolism);ko03020(RNA polymerase)
ath-MIR169g-p5_2ss7AG19GA	CSS0047777.1	CSS0047777	CSS0047777	Trihelix transcription factor [Actinidia chinensis var. chinensis]	633-650	2	GO:0003700(DNA binding transcription factor activity);GO:0005515(protein binding);GO:0005634(nucleus);GO:0006355(regulation of transcription, DNA-templated);GO:0043565(sequence-specific DNA binding)
ath-MIR169g-p5_2ss7AG19GA	CSS0018791.1	CSS0018791	CSS0018791	PREDICTED: uncharacterized protein LOC104593880 [Nelumbo nucifera]	366-384	2.5	GO:0016787(hydrolase activity)
ath-MIR169g-p5_2ss7AG19GA	CSS0033181.1	CSS0033181	CSS0033181	PREDICTED: uncharacterized protein LOC104593880 [Nelumbo nucifera]	178-196	2.5	GO:0016787(hydrolase activity)
ath-MIR169g-p5_2ss7AG19GA	CSS0027129.1	CSS0027129	CSS0027129	NA	396-415	2.5	-
ath-MIR169g-p5_2ss7AG19GA	CSS0027129.1	CSS0027129	CSS0027129	NA	358-376	2	-
ath-MIR169g-p5_2ss7AG19GA	CSS0016164.1	CSS0016164	CSS0016164	Forkhead box protein like [Actinidia chinensis var. chinensis]	124-142	2	-
ath-MIR169g-p5_2ss7AG19GA	CSS0029431.1	CSS0029431	CSS0029431	serine/threonine protein phosphatase 2A 55 kDa regulatory subunit B beta isoform isoform X2 [Solanum lycopersicum]	297-315	2.5	GO:0000159(protein phosphatase type 2A complex);GO:0000166(nucleotide binding);GO:0000278(mitotic cell cycle);GO:0004722(protein serine/threonine phosphatase activity);GO:0005515(protein binding);GO:0005737(cytoplasm);GO:0005829(cytosol);GO:0006470(protein dephosphorylation);GO:0019888(protein phosphatase regulator activity);GO:0032502(developmental process);GO:0050790(regulation of catalytic act…	ko03015(mRNA surveillance pathway)
ath-MIR169g-p5_2ss7AG19GA	CSS0016492.1	CSS0016492	CSS0016492	Protein HOTHEAD like [Actinidia chinensis var. chinensis]	209-227	2	GO:0005576(extracellular region);GO:0007267(cell-cell signaling);GO:0009553(embryo sac development);GO:0010430(fatty acid omega-oxidation);GO:0016614(oxidoreductase activity, acting on CH-OH group of donors);GO:0016832(aldehyde-lyase activity);GO:0046593(mandelonitrile lyase activity);GO:0050660(flavin adenine dinucleotide binding);GO:0055114(oxidation-reduction process)	ko00073(Cutin, suberine and wax biosynthesis)
ath-MIR169g-p5_2ss7AG19GA	CSS0020074.1	CSS0020074	CSS0020074	Protein HOTHEAD like [Actinidia chinensis var. chinensis]	185-203	2	GO:0005576(extracellular region);GO:0007267(cell-cell signaling);GO:0009553(embryo sac development);GO:0010430(fatty acid omega-oxidation);GO:0016614(oxidoreductase activity, acting on CH-OH group of donors);GO:0016832(aldehyde-lyase activity);GO:0046593(mandelonitrile lyase activity);GO:0050660(flavin adenine dinucleotide binding);GO:0055114(oxidation-reduction process)	ko00073(Cutin, suberine and wax biosynthesis)
ath-MIR169g-p5_2ss7AG19GA	CSS0016291.1	CSS0016291	CSS0016291	ABC transporter B family member 19-like [Olea europaea var. sylvestris]	850-868	2	GO:0016021(integral component of membrane);GO:0042626(ATPase activity, coupled to transmembrane movement of substances);GO:0055085(transmembrane transport)	ko02010(ABC transporters)
ath-MIR169g-p5_2ss7AG19GA	CSS0030444.1	CSS0030444	CSS0030444	Transaldolase [Actinidia chinensis var. chinensis]	184-201	2	GO:0004801(sedoheptulose-7-phosphate:D-glyceraldehyde-3-phosphate glyceronetransferase activity);GO:0005739(mitochondrion);GO:0005829(cytosol);GO:0005975(carbohydrate metabolic process);GO:0006098(pentose-phosphate shunt);GO:0009507(chloroplast);GO:0009536(plastid);GO:0009570(chloroplast stroma);GO:0009809(lignin biosynthetic process);GO:0033587(shikimate biosynthetic process);GO:0046686(response…	ko00030(Pentose phosphate pathway)
ath-MIR169g-p5_2ss7AG19GA	CSS0000882.1	CSS0000882	CSS0000882	Ethylene-responsive transcription factor [Actinidia chinensis var. chinensis]	720-739	2.5	GO:0003677(DNA binding);GO:0003700(DNA binding transcription factor activity);GO:0005634(nucleus);GO:0006351(transcription, DNA-templated);GO:0006355(regulation of transcription, DNA-templated);GO:0009414(response to water deprivation);GO:0009651(response to salt stress);GO:0009723(response to ethylene);GO:0009737(response to abscisic acid);GO:0009751(response to salicylic acid);GO:0009753(respon…	ko03040(Spliceosome)
ath-MIR169g-p5_2ss7AG19GA	CSS0020277.1	CSS0020277	CSS0020277	Protein of unknown function DUF538 protein [Actinidia chinensis var. chinensis]	655-672	1.5	GO:0003674(molecular_function);GO:0005576(extracellular region);GO:0008150(biological_process)
ath-MIR169g-p5_2ss7AG19GA	CSS0045312.1	CSS0045312	CSS0045312	hypothetical protein CEY00_Acc14331 [Actinidia chinensis var. chinensis]	172-189	2	GO:0003674(molecular_function);GO:0005634(nucleus);GO:0008150(biological_process)
ath-MIR169g-p5_2ss7AG19GA	CSS0007161.1	CSS0007161	CSS0007161	Polygalacturonase [Actinidia chinensis var. chinensis]	116-133	2.5	GO:0004650(polygalacturonase activity);GO:0005576(extracellular region);GO:0005773(vacuole);GO:0005975(carbohydrate metabolic process);GO:0009505(plant-type cell wall);GO:0016829(lyase activity);GO:0071555(cell wall organization)	ko00040(Pentose and glucuronate interconversions)
ath-MIR169g-p5_2ss7AG19GA	CSS0009616.1	CSS0009616	CSS0009616	PREDICTED: probable WRKY transcription factor 65 [Vitis vinifera]	680-698	2	GO:0003700(DNA binding transcription factor activity);GO:0005634(nucleus);GO:0006351(transcription, DNA-templated);GO:0006355(regulation of transcription, DNA-templated);GO:0043565(sequence-specific DNA binding)	ko04016(MAPK signaling pathway - plant);ko04626(Plant-pathogen interaction)
ath-MIR169g-p5_2ss7AG19GA	CSS0045033.1	CSS0045033	CSS0045033	F-box protein [Actinidia chinensis var. chinensis]	14-32	2.5	GO:0003674(molecular_function);GO:0005634(nucleus);GO:0008150(biological_process)
ath-MIR169g-p5_2ss7AG19GA	CSS0043831.1	CSS0043831	CSS0043831	PREDICTED: probable WRKY transcription factor 65 [Vitis vinifera]	680-698	2	GO:0003700(DNA binding transcription factor activity);GO:0005634(nucleus);GO:0006351(transcription, DNA-templated);GO:0006355(regulation of transcription, DNA-templated);GO:0043565(sequence-specific DNA binding)	ko04016(MAPK signaling pathway - plant);ko04626(Plant-pathogen interaction)
ath-MIR169g-p5_2ss7AG19GA	CSS0030138.1	CSS0030138	CSS0030138	Protein BRANCHLESS TRICHOME like [Actinidia chinensis var. chinensis]	283-301	2	GO:0000902(cell morphogenesis)
ath-MIR169g-p5_2ss7AG19GA	CSS0002551.1	CSS0002551	CSS0002551	Growth-regulating factor like [Actinidia chinensis var. chinensis]	653-671	2	GO:0005524(ATP binding);GO:0005634(nucleus);GO:0006351(transcription, DNA-templated);GO:0006355(regulation of transcription, DNA-templated);GO:0009941(chloroplast envelope);GO:0032502(developmental process);GO:0048366(leaf development)
ath-MIR169g-p5_2ss7AG19GA	CSS0043054.1	CSS0043054	CSS0043054	NAC domain-containing protein [Actinidia chinensis var. chinensis]	1162-1180	2.5	GO:0003677(DNA binding);GO:0003700(DNA binding transcription factor activity);GO:0005634(nucleus);GO:0006351(transcription, DNA-templated);GO:0007275(multicellular organism development);GO:0009793(embryo development ending in seed dormancy);GO:0009809(lignin biosynthetic process);GO:0009834(plant-type secondary cell wall biogenesis);GO:0009901(anther dehiscence);GO:0010047(fruit dehiscence);GO:00…	ko03013(RNA transport);ko03015(mRNA surveillance pathway);ko03018(RNA degradation)
ath-MIR169g-p5_2ss7AG19GA	CSS0017499.1	CSS0017499	CSS0017499	E3 ubiquitin-protein like [Actinidia chinensis var. chinensis]	152-171	2.5	GO:0043161(proteasome-mediated ubiquitin-dependent protein catabolic process);GO:0061630(ubiquitin protein ligase activity)
ath-MIR169g-p5_2ss7AG19GA	CSS0032783.1	CSS0032783	CSS0032783	lipoxygenase [Camellia sinensis]	288-306	2	GO:0016165(linoleate 13S-lipoxygenase activity)	ko00591(Linoleic acid metabolism);ko00592(alpha-Linolenic acid metabolism)
ath-MIR169g-p5_2ss7AG19GA	CSS0028606.1	CSS0028606	CSS0028606	50S ribosomal protein [Actinidia chinensis var. chinensis]	160-177	2	GO:0003735(structural constituent of ribosome);GO:0005840(ribosome);GO:0006412(translation);GO:0009507(chloroplast);GO:0009570(chloroplast stroma);GO:0009941(chloroplast envelope);GO:0016020(membrane);GO:0019843(rRNA binding)	ko03010(Ribosome)
ath-MIR169g-p5_2ss7AG19GA	CSS0042605.1	CSS0042605	CSS0042605	uncharacterized protein LOC111309487 [Durio zibethinus]	72-89	2.5	GO:0003746(translation elongation factor activity);GO:0005634(nucleus);GO:0006414(translational elongation)
ath-MIR169g-p5_2ss7AG19GA	CSS0006896.1	CSS0006896	CSS0006896	uncharacterized protein LOC111309487 [Durio zibethinus]	72-89	2.5	GO:0003746(translation elongation factor activity);GO:0005634(nucleus);GO:0006414(translational elongation)
ath-MIR169g-p5_2ss7AG19GA	CSS0031711.1	CSS0031711	CSS0031711	Transcription factor bHLH155 like [Actinidia chinensis var. chinensis]	1237-1255	1	GO:0004674(protein serine/threonine kinase activity);GO:0005829(cytosol);GO:0006468(protein phosphorylation);GO:0035556(intracellular signal transduction)
ath-MIR169g-p5_2ss7AG19GA	CSS0000501.1	CSS0000501	CSS0000501	Disease resistance protein [Actinidia chinensis var. chinensis]	1-18	2.5	GO:0000166(nucleotide binding);GO:0005515(protein binding);GO:0005524(ATP binding);GO:0005886(plasma membrane);GO:0006952(defense response);GO:0007165(signal transduction);GO:0009626(plant-type hypersensitive response);GO:0012505(endomembrane system);GO:0019897(extrinsic component of plasma membrane);GO:0043531(ADP binding)	ko04626(Plant-pathogen interaction)
ath-MIR169g-p5_2ss7AG19GA	CSS0015720.1	CSS0015720	CSS0015720	Polygalacturonase [Actinidia chinensis var. chinensis]	164-181	2.5	GO:0004650(polygalacturonase activity);GO:0005576(extracellular region);GO:0005773(vacuole);GO:0005975(carbohydrate metabolic process);GO:0009505(plant-type cell wall);GO:0016829(lyase activity);GO:0071555(cell wall organization)	ko00040(Pentose and glucuronate interconversions)
ath-MIR169g-p5_2ss7AG19GA	CSS0017859.1	CSS0017859	CSS0017859	DEAD-box ATP-dependent RNA helicase [Actinidia chinensis var. chinensis]	91-110	2.5	GO:0004004(ATP-dependent RNA helicase activity);GO:0010501(RNA secondary structure unwinding)	ko03040(Spliceosome)
ath-MIR169g-p5_2ss7AG19GA	CSS0025258.1	CSS0025258	CSS0025258	PREDICTED: dof zinc finger protein DOF1.8-like isoform X1 [Gossypium hirsutum]	658-676	2	GO:0003677(DNA binding);GO:0003682(chromatin binding);GO:0003700(DNA binding transcription factor activity);GO:0005634(nucleus);GO:0006351(transcription, DNA-templated);GO:0006355(regulation of transcription, DNA-templated);GO:0009639(response to red or far red light);GO:0009845(seed germination);GO:0044212(transcription regulatory region DNA binding);GO:0045892(negative regulation of transcripti…
ath-MIR169g-p5_2ss7AG19GA	CSS0033513.1	CSS0033513	CSS0033513	RING finger and transmembrane domain-containing protein [Actinidia chinensis var. chinensis]	15-32	2	GO:0008270(zinc ion binding);GO:0016021(integral component of membrane)
ath-MIR169g-p5_2ss7AG19GA	CSS0021566.1	CSS0021566	CSS0021566	GON-4-like protein [Actinidia chinensis var. chinensis]	139-157	2.5	GO:0003674(molecular_function);GO:0005575(cellular_component);GO:0015031(protein transport)
ath-MIR169g-p5_2ss7AG19GA	CSS0017478.1	CSS0017478	CSS0017478	Magnesium transporter like [Actinidia chinensis var. chinensis]	111-129	2.5	GO:0005769(early endosome);GO:0005886(plasma membrane);GO:0008150(biological_process);GO:0015095(magnesium ion transmembrane transporter activity);GO:0016021(integral component of membrane)
ath-MIR169g-p5_2ss7AG19GA	CSS0016712.1	CSS0016712	CSS0016712	NAC domain-containing protein, partial [Actinidia chinensis var. chinensis]	898-916	2	GO:0000077(DNA damage checkpoint);GO:0003700(DNA binding transcription factor activity);GO:0005634(nucleus);GO:0006351(transcription, DNA-templated);GO:0006355(regulation of transcription, DNA-templated);GO:0007275(multicellular organism development);GO:0010332(response to gamma radiation);GO:0040020(regulation of meiotic nuclear division);GO:0043565(sequence-specific DNA binding)
ath-MIR169g-p5_2ss7AG19GA	CSS0048378.1	CSS0048378	CSS0048378	Protein NRT1/ PTR FAMILY 3.1 like [Actinidia chinensis var. chinensis]	377-395	2.5	GO:0005215(transporter activity);GO:0005886(plasma membrane);GO:0006857(oligopeptide transport);GO:0010336(gibberellic acid homeostasis);GO:0016020(membrane);GO:0016021(integral component of membrane);GO:0022857(transmembrane transporter activity);GO:0042128(nitrate assimilation);GO:0055085(transmembrane transport);GO:0097708(intracellular vesicle)
ath-MIR169g-p5_2ss7AG19GA	CSS0012740.1	CSS0012740	CSS0012740	PREDICTED: protein NRT1/ PTR FAMILY 3.1 [Capsicum annuum]	334-352	2.5	GO:0005215(transporter activity);GO:0005886(plasma membrane);GO:0006857(oligopeptide transport);GO:0010336(gibberellic acid homeostasis);GO:0016020(membrane);GO:0016021(integral component of membrane);GO:0022857(transmembrane transporter activity);GO:0042128(nitrate assimilation);GO:0055085(transmembrane transport);GO:0097708(intracellular vesicle)
ath-MIR169g-p5_2ss7AG19GA	CSS0004684.1	CSS0004684	CSS0004684	chlorophyllase-1 [Camellia sinensis]	167-184	1.5	GO:0005773(vacuole);GO:0009507(chloroplast);GO:0015996(chlorophyll catabolic process);GO:0042742(defense response to bacterium);GO:0047746(chlorophyllase activity);GO:0050832(defense response to fungus);GO:0102293(pheophytinase b activity)	ko00860(Porphyrin and chlorophyll metabolism)
ath-MIR169g-p5_2ss7AG19GA	CSS0003236.1	CSS0003236	CSS0003236	UDP-glycosyltransferase 91A5 [Camellia sinensis]	19-38	2.5	GO:0009813(flavonoid biosynthetic process);GO:0043231(intracellular membrane-bounded organelle);GO:0052696(flavonoid glucuronidation);GO:0080043(quercetin 3-O-glucosyltransferase activity);GO:0080044(quercetin 7-O-glucosyltransferase activity)
ath-MIR169g-p5_2ss7AG19GA	CSS0027831.1	CSS0027831	CSS0027831	unnamed protein product [Coffea canephora]	158-176	2	-
ath-MIR169g-p5_2ss7AG19GA	CSS0032886.1	CSS0032886	CSS0032886	Cysteine-rich repeat secretory protein like, partial [Actinidia chinensis var. chinensis]	1114-1131	2	GO:0003674(molecular_function);GO:0005576(extracellular region);GO:0009506(plasmodesma);GO:0010497(plasmodesmata-mediated intercellular transport);GO:0016021(integral component of membrane);GO:0046739(transport of virus in multicellular host)	ko03040(Spliceosome);ko04120(Ubiquitin mediated proteolysis)
ath-MIR169g-p5_2ss7AG19GA	CSS0023137.1	CSS0023137	CSS0023137	Serine/threonine-protein kinase [Actinidia chinensis var. chinensis]	78-96	1	GO:0004672(protein kinase activity);GO:0005886(plasma membrane);GO:0016301(kinase activity);GO:0016310(phosphorylation)
ath-MIR169g-p5_2ss7AG19GA	CSS0036725.1	CSS0036725	CSS0036725	ethylene-responsive transcription factor ERF095-like [Chenopodium quinoa]	276-293	2	GO:0003677(DNA binding);GO:0003700(DNA binding transcription factor activity);GO:0005622(intracellular);GO:0005634(nucleus);GO:0006351(transcription, DNA-templated);GO:0006355(regulation of transcription, DNA-templated);GO:0009873(ethylene-activated signaling pathway)	ko04016(MAPK signaling pathway - plant);ko04075(Plant hormone signal transduction)
ath-MIR169g-p5_2ss7AG19GA	CSS0041850.1	CSS0041850	CSS0041850	ethylene-responsive transcription factor ERF095-like [Chenopodium quinoa]	276-293	2	GO:0003677(DNA binding);GO:0003700(DNA binding transcription factor activity);GO:0005622(intracellular);GO:0005634(nucleus);GO:0006351(transcription, DNA-templated);GO:0006355(regulation of transcription, DNA-templated);GO:0009873(ethylene-activated signaling pathway)	ko04016(MAPK signaling pathway - plant);ko04075(Plant hormone signal transduction)
ath-MIR169g-p5_2ss7AG19GA	CSS0027818.1	CSS0027818	CSS0027818	hypothetical protein MIMGU_mgv1a004154mg [Erythranthe guttata]	179-197	2	-
ath-MIR169g-p5_2ss7AG19GA	CSS0045881.1	CSS0045881	CSS0045881	copia-type reverse transcriptase-like protein [Arabidopsis thaliana]	1223-1241	2.5	GO:0003723(RNA binding);GO:0004525(ribonuclease III activity);GO:0005634(nucleus);GO:0005737(cytoplasm);GO:0016442(RISC complex);GO:0030422(production of siRNA involved in RNA interference)	ko00230(Purine metabolism);ko00240(Pyrimidine metabolism);ko03020(RNA polymerase)
ath-MIR169g-p5_2ss7AG19GA	CSS0018346.1	CSS0018346	CSS0018346	PREDICTED: RHOMBOID-like protein 2 [Daucus carota subsp. sativus]	295-313	2.5	GO:0004252(serine-type endopeptidase activity);GO:0016485(protein processing)
ath-MIR169g-p5_2ss7AG19GA	CSS0005668.1	CSS0005668	CSS0005668	PREDICTED: probable E3 ubiquitin-protein ligase RNF144A-B [Vitis vinifera]	202-220	2.5	GO:0000151(ubiquitin ligase complex);GO:0000209(protein polyubiquitination);GO:0005737(cytoplasm);GO:0031624(ubiquitin conjugating enzyme binding);GO:0032436(positive regulation of proteasomal ubiquitin-dependent protein catabolic process);GO:0061630(ubiquitin protein ligase activity)
ath-MIR169g-p5_2ss7AG19GA	CSS0015369.1	CSS0015369	CSS0015369	Protein lingerer like [Actinidia chinensis var. chinensis]	2-20	2.5	-
ath-MIR169g-p5_2ss7AG19GA	CSS0035060.1	CSS0035060	CSS0035060	Retrovirus-related Pol polyprotein from transposon RE1 [Vitis vinifera]	529-547	2.5	-
ath-MIR169g-p5_2ss7AG19GA	CSS0015047.1	CSS0015047	CSS0015047	Glutamate-tRNA ligase, bacterial/mitochondrial [Trema orientale]	315-332	2	GO:0003723(RNA binding);GO:0004818(glutamate-tRNA ligase activity);GO:0005739(mitochondrion);GO:0006424(glutamyl-tRNA aminoacylation);GO:0009570(chloroplast stroma);GO:0070127(tRNA aminoacylation for mitochondrial protein translation)	ko00860(Porphyrin and chlorophyll metabolism);ko00970(Aminoacyl-tRNA biosynthesis)
ath-MIR169g-p5_2ss7AG19GA	CSS0019429.2	CSS0019429	CSS0019429	PREDICTED: calcium-dependent protein kinase 26 isoform X1 [Cucumis melo]	252-271	2.5	GO:0004683(calmodulin-dependent protein kinase activity);GO:0005516(calmodulin binding);GO:0005634(nucleus);GO:0005737(cytoplasm);GO:0005886(plasma membrane);GO:0009738(abscisic acid-activated signaling pathway);GO:0009931(calcium-dependent protein serine/threonine kinase activity);GO:0018105(peptidyl-serine phosphorylation);GO:0035556(intracellular signal transduction);GO:0046777(protein autopho…	ko04626(Plant-pathogen interaction)
ath-MIR169g-p5_2ss7AG19GA	CSS0021931.1	CSS0021931	CSS0021931	Ethylene-responsive transcription factor [Actinidia chinensis var. chinensis]	461-479	2.5	GO:0003677(DNA binding);GO:0003700(DNA binding transcription factor activity);GO:0005634(nucleus);GO:0006351(transcription, DNA-templated);GO:0006355(regulation of transcription, DNA-templated);GO:0009861(jasmonic acid and ethylene-dependent systemic resistance);GO:0009863(salicylic acid mediated signaling pathway);GO:0009873(ethylene-activated signaling pathway);GO:0043565(sequence-specific DNA …
ath-MIR169g-p5_2ss7AG19GA	CSS0030718.1	CSS0030718	CSS0030718	Chaperonin like [Actinidia chinensis var. chinensis]	321-338	2	GO:0005576(extracellular region);GO:0005886(plasma membrane);GO:0009506(plasmodesma);GO:0016021(integral component of membrane)
ath-MIR169g-p5_2ss7AG19GA	CSS0001481.1	CSS0001481	CSS0001481	pentatricopeptide repeat-containing protein At1g73400, mitochondrial [Olea europaea var. sylvestris]	614-632	2	-
ath-MIR169g-p5_2ss7AG19GA	CSS0001640.1	CSS0001640	CSS0001640	pyruvate decarboxylase 2 [Diospyros kaki]	52-70	2	GO:0000287(magnesium ion binding);GO:0004737(pyruvate decarboxylase activity);GO:0005575(cellular_component);GO:0016831(carboxy-lyase activity);GO:0030976(thiamine pyrophosphate binding)	ko00010(Glycolysis / Gluconeogenesis)
ath-MIR169g-p5_2ss7AG19GA	CSS0015083.1	CSS0015083	CSS0015083	lysM domain receptor-like kinase 3 isoform X1 [Citrus sinensis]	808-826	2	GO:0005515(protein binding);GO:0005775(vacuolar lumen);GO:0005886(plasma membrane);GO:0009609(response to symbiotic bacterium);GO:0009877(nodulation);GO:0016301(kinase activity);GO:0046777(protein autophosphorylation)	ko04626(Plant-pathogen interaction)
ath-MIR169g-p5_2ss7AG19GA	CSS0017171.1	CSS0017171	CSS0017171	NA	65-83	2.5	-
ath-MIR169g-p5_2ss7AG19GA	CSS0014859.1	CSS0014859	CSS0014859	BTB/POZ domain-containing protein [Actinidia chinensis var. chinensis]	308-326	1.5	GO:0005770(late endosome);GO:0005886(plasma membrane);GO:0009416(response to light stimulus);GO:0009908(flower development);GO:0009911(positive regulation of flower development);GO:0010229(inflorescence development);GO:0010540(basipetal auxin transport);GO:0016567(protein ubiquitination);GO:0045176(apical protein localization);GO:0048825(cotyledon development);GO:0048827(phyllome development);GO:…
ath-MIR169g-p5_2ss7AG19GA	CSS0034938.1	CSS0034938	CSS0034938	hypothetical protein DVH24_013062 [Malus domestica]	116-135	2.5	GO:0003674(molecular_function);GO:0005783(endoplasmic reticulum);GO:0005789(endoplasmic reticulum membrane);GO:0009705(plant-type vacuole membrane);GO:0009838(abscission);GO:0010256(endomembrane system organization);GO:0016021(integral component of membrane)
ath-MIR169g-p5_2ss7AG19GA	CSS0041930.1	CSS0041930	CSS0041930	Purple acid phosphatase [Actinidia chinensis var. chinensis]	814-832	2.5	GO:0003993(acid phosphatase activity);GO:0005615(extracellular space);GO:0030145(manganese ion binding);GO:0046872(metal ion binding)	ko00130(Ubiquinone and other terpenoid-quinone biosynthesis)
ath-MIR169g-p5_2ss7AG19GA	CSS0019399.1	CSS0019399	CSS0019399	trihelix transcription factor PTL-like [Hevea brasiliensis]	150-169	2	GO:0003677(DNA binding);GO:0003700(DNA binding transcription factor activity);GO:0005634(nucleus);GO:0006351(transcription, DNA-templated);GO:0006355(regulation of transcription, DNA-templated);GO:0009909(regulation of flower development);GO:0010200(response to chitin);GO:0042803(protein homodimerization activity);GO:0046621(negative regulation of organ growth);GO:0048441(petal development);GO:00…	ko00040(Pentose and glucuronate interconversions)
ath-MIR169g-p5_2ss7AG19GA	CSS0000726.1	CSS0000726	CSS0000726	Thermospermine synthase [Actinidia chinensis var. chinensis]	244-262	2.5	GO:0005737(cytoplasm);GO:0006596(polyamine biosynthetic process);GO:0010487(thermospermine synthase activity)
ath-MIR169g-p5_2ss7AG19GA	CSS0024110.1	CSS0024110	CSS0024110	GTP-binding protein like [Actinidia chinensis var. chinensis]	107-125	2.5	GO:0005525(GTP binding);GO:0005783(endoplasmic reticulum);GO:0005794(Golgi apparatus);GO:0005829(cytosol);GO:0005886(plasma membrane);GO:0006886(intracellular protein transport);GO:0016192(vesicle-mediated transport)	ko04141(Protein processing in endoplasmic reticulum)
ath-MIR169g-p5_2ss7AG19GA	CSS0038069.1	CSS0038069	CSS0038069	Pentatricopeptide repeat-containing protein [Actinidia chinensis var. chinensis]	112-130	2	GO:0003723(RNA binding);GO:0004519(endonuclease activity);GO:0006397(mRNA processing);GO:0008270(zinc ion binding);GO:0009451(RNA modification);GO:0009507(chloroplast);GO:0031425(chloroplast RNA processing)
ath-MIR169g-p5_2ss7AG19GA	CSS0029741.1	CSS0029741	CSS0029741	Coiled-coil domain-containing protein [Actinidia chinensis var. chinensis]	456-474	2	-
ath-MIR169g-p5_2ss7AG19GA	CSS0043162.1	CSS0043162	CSS0043162	NA	120-138	2.5	-
ath-MIR169g-p5_2ss7AG19GA	CSS0030677.1	CSS0030677	CSS0030677	Rust resistance kinase Lr10 [Vitis vinifera]	87-105	2.5	GO:0005886(plasma membrane)
ath-MIR169g-p5_2ss7AG19GA	CSS0031999.1	CSS0031999	CSS0031999	indole-3-pyruvate monooxygenase YUCCA6-like [Manihot esculenta]	37-55	2	GO:0004497(monooxygenase activity);GO:0055114(oxidation-reduction process)	ko00380(Tryptophan metabolism)
ath-MIR169g-p5_2ss7AG19GA	CSS0042213.1	CSS0042213	CSS0042213	Zinc transporter like [Actinidia chinensis var. chinensis]	134-152	2.5	-
ath-MIR169g-p5_2ss7AG19GA	CSS0040195.1	CSS0040195	CSS0040195	Rhomboid-like protein [Actinidia chinensis var. chinensis]	19-36	2	GO:0004252(serine-type endopeptidase activity);GO:0016485(protein processing)
ath-MIR169g-p5_2ss7AG19GA	CSS0018670.1	CSS0018670	CSS0018670	cyclin dependent kinase A [Camellia sinensis]	175-193	2.5	GO:0000226(microtubule cytoskeleton organization);GO:0000911(cytokinesis by cell plate formation);GO:0004672(protein kinase activity);GO:0004693(cyclin-dependent protein serine/threonine kinase activity);GO:0005515(protein binding);GO:0005524(ATP binding);GO:0005634(nucleus);GO:0005737(cytoplasm);GO:0005829(cytosol);GO:0005886(plasma membrane);GO:0006281(DNA repair);GO:0007346(regulation of mitot…
ath-MIR169g-p5_2ss7AG19GA	CSS0010587.1	CSS0010587	CSS0010587	DNA gyrase subunit B like [Actinidia chinensis var. chinensis]	2528-2546	2	GO:0003918(DNA topoisomerase type II (ATP-hydrolyzing) activity);GO:0006265(DNA topological change);GO:0006268(DNA unwinding involved in DNA replication);GO:0007059(chromosome segregation);GO:0009295(nucleoid);GO:0009330(DNA topoisomerase complex (ATP-hydrolyzing))
ath-MIR169g-p5_2ss7AG19GA	CSS0048086.1	CSS0048086	CSS0048086	PREDICTED: uncharacterized protein LOC104242954 [Nicotiana sylvestris]	427-445	2.5	GO:0004386(helicase activity);GO:0005634(nucleus);GO:0008150(biological_process)
ath-MIR169g-p5_2ss7AG19GA	CSS0048086.1	CSS0048086	CSS0048086	PREDICTED: uncharacterized protein LOC104242954 [Nicotiana sylvestris]	113-131	2	GO:0004386(helicase activity);GO:0005634(nucleus);GO:0008150(biological_process)
ath-MIR169g-p5_2ss7AG19GA	CSS0001222.1	CSS0001222	CSS0001222	hypothetical protein CEY00_Acc23765 [Actinidia chinensis var. chinensis]	91-108	2.5	GO:0003674(molecular_function);GO:0005634(nucleus);GO:0008150(biological_process)
ath-MIR169g-p5_2ss7AG19GA	CSS0023603.1	CSS0023603	CSS0023603	uncharacterized protein LOC113863724 isoform X1 [Abrus precatorius]	119-137	2.5	GO:0004386(helicase activity);GO:0005634(nucleus);GO:0008150(biological_process)
ath-MIR169g-p5_2ss7AG19GA	CSS0004355.1	CSS0004355	CSS0004355	disease resistance protein At4g27190-like isoform X1 [Durio zibethinus]	2525-2543	2.5	GO:0005515(protein binding);GO:0005524(ATP binding);GO:0005886(plasma membrane);GO:0006952(defense response);GO:0007165(signal transduction);GO:0043531(ADP binding)	ko04626(Plant-pathogen interaction)
ath-MIR169g-p5_2ss7AG19GA	CSS0005423.1	CSS0005423	CSS0005423	Disease resistance protein [Actinidia chinensis var. chinensis]	255-274	2	GO:0000166(nucleotide binding);GO:0005515(protein binding);GO:0005524(ATP binding);GO:0005886(plasma membrane);GO:0006952(defense response);GO:0007165(signal transduction);GO:0009626(plant-type hypersensitive response);GO:0012505(endomembrane system);GO:0019897(extrinsic component of plasma membrane);GO:0043531(ADP binding)	ko04626(Plant-pathogen interaction)
ath-MIR169g-p5_2ss7AG19GA	CSS0018044.1	CSS0018044	CSS0018044	Non-functional pseudokinase [Actinidia chinensis var. chinensis]	1175-1192	2.5	GO:0004674(protein serine/threonine kinase activity);GO:0005886(plasma membrane);GO:0007166(cell surface receptor signaling pathway)
ath-MIR169g-p5_2ss7AG19GA	CSS0039663.1	CSS0039663	CSS0039663	disease resistance protein At4g27190-like isoform X1 [Durio zibethinus]	2320-2339	2	GO:0005524(ATP binding);GO:0005739(mitochondrion);GO:0006952(defense response);GO:0043531(ADP binding)	ko04626(Plant-pathogen interaction)
ath-MIR169g-p5_2ss7AG19GA	CSS0019751.1	CSS0019751	CSS0019751	Disease resistance protein [Actinidia chinensis var. chinensis]	255-274	2	GO:0005524(ATP binding);GO:0005886(plasma membrane);GO:0006952(defense response);GO:0043531(ADP binding)	ko04626(Plant-pathogen interaction)
ath-MIR169g-p5_2ss7AG19GA	CSS0012849.1	CSS0012849	CSS0012849	RNA polymerase II C-terminal domain phosphatase-like [Actinidia chinensis var. chinensis]	368-385	2	GO:0008420(CTD phosphatase activity);GO:0016591(DNA-directed RNA polymerase II, holoenzyme);GO:0070940(dephosphorylation of RNA polymerase II C-terminal domain)
ath-MIR169g-p5_2ss7AG19GA	CSS0012849.1	CSS0012849	CSS0012849	RNA polymerase II C-terminal domain phosphatase-like [Actinidia chinensis var. chinensis]	335-353	2	GO:0008420(CTD phosphatase activity);GO:0016591(DNA-directed RNA polymerase II, holoenzyme);GO:0070940(dephosphorylation of RNA polymerase II C-terminal domain)
ath-MIR169g-p5_2ss7AG19GA	CSS0046330.1	CSS0046330	CSS0046330	Stabilin-1 like [Actinidia chinensis var. chinensis]	13-31	1	GO:0006508(proteolysis);GO:0008233(peptidase activity);GO:0009507(chloroplast);GO:0016021(integral component of membrane)	ko00970(Aminoacyl-tRNA biosynthesis)
ath-MIR169g-p5_2ss7AG19GA	CSS0000396.1	CSS0000396	CSS0000396	Octicosapeptide/Phox/Bem1p family protein isoform 1 [Theobroma cacao]	484-502	2	GO:0003674(molecular_function);GO:0005634(nucleus);GO:0008150(biological_process)
ath-MIR169g-p5_2ss7AG19GA	CSS0022045.1	CSS0022045	CSS0022045	probable disease resistance protein At4g27220 [Quercus suber]	1952-1970	2	GO:0000166(nucleotide binding);GO:0005515(protein binding);GO:0005524(ATP binding);GO:0005622(intracellular);GO:0005886(plasma membrane);GO:0006952(defense response);GO:0008219(cell death);GO:0009626(plant-type hypersensitive response);GO:0009816(defense response to bacterium, incompatible interaction);GO:0038023(signaling receptor activity);GO:0042802(identical protein binding);GO:0043531(ADP bi…	ko04626(Plant-pathogen interaction)
ath-MIR169g-p5_2ss7AG19GA	CSS0009867.1	CSS0009867	CSS0009867	Transcription factor bHLH155 like [Actinidia chinensis var. chinensis]	1129-1147	2.5	GO:0004674(protein serine/threonine kinase activity);GO:0005829(cytosol);GO:0006468(protein phosphorylation);GO:0035556(intracellular signal transduction)
ath-MIR169g-p5_2ss7AG19GA	CSS0020108.1	CSS0020108	CSS0020108	Trihelix transcription factor GT-3b like [Actinidia chinensis var. chinensis]	406-424	2	GO:0003700(DNA binding transcription factor activity);GO:0005515(protein binding);GO:0005634(nucleus);GO:0006351(transcription, DNA-templated);GO:0006355(regulation of transcription, DNA-templated);GO:0042802(identical protein binding);GO:0043565(sequence-specific DNA binding)
ath-MIR169g-p5_2ss7AG19GA	CSS0024882.1	CSS0024882	CSS0024882	Partner of Y14 and mago like [Actinidia chinensis var. chinensis]	175-194	2	GO:0005737(cytoplasm)	ko03013(RNA transport);ko03015(mRNA surveillance pathway)
ath-MIR169g-p5_2ss7AG19GA	CSS0011567.1	CSS0011567	CSS0011567	Methylsterol monooxygenase [Actinidia chinensis var. chinensis]	709-727	2.5	GO:0000254(C-4 methylsterol oxidase activity);GO:0003824(catalytic activity);GO:0005506(iron ion binding);GO:0005789(endoplasmic reticulum membrane);GO:0016021(integral component of membrane);GO:0016126(sterol biosynthetic process);GO:0080064(4,4-dimethyl-9beta,19-cyclopropylsterol oxidation)	ko00100(Steroid biosynthesis)
ath-MIR169g-p5_2ss7AG19GA	CSS0037160.1	CSS0037160	CSS0037160	WRKY transcription factor 33 [Actinidia chinensis var. chinensis]	201-218	2	GO:0003700(DNA binding transcription factor activity);GO:0005515(protein binding);GO:0005634(nucleus);GO:0006351(transcription, DNA-templated);GO:0006355(regulation of transcription, DNA-templated);GO:0006970(response to osmotic stress);GO:0009408(response to heat);GO:0009409(response to cold);GO:0009414(response to water deprivation);GO:0009651(response to salt stress);GO:0010120(camalexin biosy…	ko04016(MAPK signaling pathway - plant);ko04626(Plant-pathogen interaction)
ath-MIR169g-p5_2ss7AG19GA	CSS0037160.1	CSS0037160	CSS0037160	WRKY transcription factor 33 [Actinidia chinensis var. chinensis]	115-133	2	GO:0003700(DNA binding transcription factor activity);GO:0005515(protein binding);GO:0005634(nucleus);GO:0006351(transcription, DNA-templated);GO:0006355(regulation of transcription, DNA-templated);GO:0006970(response to osmotic stress);GO:0009408(response to heat);GO:0009409(response to cold);GO:0009414(response to water deprivation);GO:0009651(response to salt stress);GO:0010120(camalexin biosy…	ko04016(MAPK signaling pathway - plant);ko04626(Plant-pathogen interaction)
ath-MIR169g-p5_2ss7AG19GA	CSS0011019.1	CSS0011019	CSS0011019	Jasmonate-zim-domain protein 12, putative isoform 1 [Theobroma cacao]	651-670	2	GO:0003714(transcription corepressor activity);GO:0005634(nucleus);GO:0009611(response to wounding);GO:0031347(regulation of defense response);GO:1903507(negative regulation of nucleic acid-templated transcription);GO:2000022(regulation of jasmonic acid mediated signaling pathway)	ko04075(Plant hormone signal transduction)
ath-MIR169g-p5_2ss7AG19GA	CSS0003078.1	CSS0003078	CSS0003078	RHOMBOID-like protein [Actinidia chinensis var. chinensis]	873-891	2.5	GO:0004252(serine-type endopeptidase activity);GO:0016485(protein processing)	ko00510(N-Glycan biosynthesis)
ath-MIR169g-p5_2ss7AG19GA	CSS0039997.1	CSS0039997	CSS0039997	CBL-interacting serine/threonine-protein kinase [Actinidia chinensis var. chinensis]	113-130	2	GO:0004674(protein serine/threonine kinase activity);GO:0005515(protein binding);GO:0005524(ATP binding);GO:0005634(nucleus);GO:0005773(vacuole);GO:0005886(plasma membrane);GO:0009506(plasmodesma);GO:0016301(kinase activity);GO:0018105(peptidyl-serine phosphorylation);GO:0018107(peptidyl-threonine phosphorylation);GO:0035556(intracellular signal transduction)
ath-MIR169g-p5_2ss7AG19GA	CSS0016693.1	CSS0016693	CSS0016693	TVP38/TMEM64 family membrane protein like [Actinidia chinensis var. chinensis]	48-66	2	GO:0003674(molecular_function);GO:0005886(plasma membrane);GO:0008150(biological_process);GO:0016021(integral component of membrane)
ath-MIR169g-p5_2ss7AG19GA	CSS0027931.1	CSS0027931	CSS0027931	PREDICTED: flap endonuclease 1 isoform X1 [Vitis vinifera]	1454-1473	2	GO:0003677(DNA binding);GO:0004518(nuclease activity);GO:0004519(endonuclease activity);GO:0004527(exonuclease activity);GO:0005634(nucleus);GO:0005654(nucleoplasm);GO:0005730(nucleolus);GO:0005739(mitochondrion);GO:0005829(cytosol);GO:0006260(DNA replication);GO:0006281(DNA repair);GO:0009411(response to UV);GO:0046872(metal ion binding);GO:0048256(flap endonuclease activity)	ko03030(DNA replication);ko03410(Base excision repair);ko03450(Non-homologous end-joining)
ath-MIR169g-p5_2ss7AG19GA	CSS0042206.1	CSS0042206	CSS0042206	DET1- and DDB1-associated protein [Actinidia chinensis var. chinensis]	613-630	2	GO:0005515(protein binding);GO:0005634(nucleus);GO:0009788(negative regulation of abscisic acid-activated signaling pathway);GO:0016874(ligase activity);GO:0032434(regulation of proteasomal ubiquitin-dependent protein catabolic process);GO:0032436(positive regulation of proteasomal ubiquitin-dependent protein catabolic process)
ath-MIR169g-p5_2ss7AG19GA	CSS0005244.1	CSS0005244	CSS0005244	Golgi apparatus membrane protein [Actinidia chinensis var. chinensis]	135-152	2	GO:0009507(chloroplast);GO:0009706(chloroplast inner membrane);GO:0009941(chloroplast envelope);GO:0016021(integral component of membrane)
ath-MIR169g-p5_2ss7AG19GA	CSS0024495.1	CSS0024495	CSS0024495	Leucine-rich repeat receptor-like protein kinase precursor [Actinidia chinensis var. chinensis]	2786-2804	1.5	GO:0004674(protein serine/threonine kinase activity);GO:0005515(protein binding);GO:0005524(ATP binding);GO:0005634(nucleus);GO:0005886(plasma membrane);GO:0006468(protein phosphorylation);GO:0009506(plasmodesma);GO:0009755(hormone-mediated signaling pathway);GO:0010183(pollen tube guidance);GO:0016020(membrane);GO:0016021(integral component of membrane);GO:0016301(kinase activity);GO:0090406(pol…
ath-MIR169g-p5_2ss7AG19GA	CSS0032780.1	CSS0032780	CSS0032780	Polygalacturonase [Actinidia chinensis var. chinensis]	54-71	2	GO:0004650(polygalacturonase activity);GO:0005576(extracellular region);GO:0005975(carbohydrate metabolic process)	ko00040(Pentose and glucuronate interconversions)
ath-MIR169g-p5_2ss7AG19GA	CSS0007199.1	CSS0007199	CSS0007199	F-actin-capping protein subunit alpha like [Actinidia chinensis var. chinensis]	82-99	1.5	GO:0003779(actin binding);GO:0005634(nucleus);GO:0005737(cytoplasm);GO:0007015(actin filament organization);GO:0008290(F-actin capping protein complex);GO:0030036(actin cytoskeleton organization);GO:0051016(barbed-end actin filament capping);GO:0051693(actin filament capping)	ko04144(Endocytosis)
ath-MIR169g-p5_2ss7AG19GA	CSS0046376.1	CSS0046376	CSS0046376	Isocitrate dehydrogenase [NAD] regulatory subunit 1 like [Actinidia chinensis var. chinensis]	44-62	2.5	GO:0004449(isocitrate dehydrogenase (NAD+) activity);GO:0005739(mitochondrion);GO:0006099(tricarboxylic acid cycle);GO:0006102(isocitrate metabolic process);GO:0008270(zinc ion binding)	ko00020(Citrate cycle (TCA cycle))
ath-MIR169g-p5_2ss7AG19GA	CSS0025346.1	CSS0025346	CSS0025346	hypothetical protein CEY00_Acc11078 [Actinidia chinensis var. chinensis]	196-214	2.5	GO:0000326(protein storage vacuole);GO:0005515(protein binding);GO:0005783(endoplasmic reticulum);GO:0005789(endoplasmic reticulum membrane);GO:0005886(plasma membrane);GO:0006623(protein targeting to vacuole);GO:0016021(integral component of membrane);GO:0032586(protein storage vacuole membrane)	ko00230(Purine metabolism);ko00240(Pyrimidine metabolism);ko03020(RNA polymerase)
ath-MIR169g-p5_2ss7AG19GA	CSS0017338.1	CSS0017338	CSS0017338	transcription factor TCP2 [Camellia sinensis]	1073-1091	2.5	GO:0003677(DNA binding);GO:0003700(DNA binding transcription factor activity);GO:0005515(protein binding);GO:0005634(nucleus);GO:0006351(transcription, DNA-templated);GO:0006355(regulation of transcription, DNA-templated);GO:0009637(response to blue light);GO:0009965(leaf morphogenesis);GO:0030154(cell differentiation);GO:0045962(positive regulation of development, heterochronic);GO:0048366(leaf …
ath-MIR169g-p5_2ss7AG19GA	CSS0050321.1	CSS0050321	CSS0050321	PREDICTED: protein indeterminate-domain 2-like [Nicotiana tomentosiformis]	1500-1518	2	GO:0003676(nucleic acid binding);GO:0003700(DNA binding transcription factor activity);GO:0005515(protein binding);GO:0005634(nucleus);GO:0006351(transcription, DNA-templated);GO:0006355(regulation of transcription, DNA-templated);GO:0008270(zinc ion binding);GO:0008356(asymmetric cell division);GO:0044212(transcription regulatory region DNA binding);GO:0046872(metal ion binding);GO:0048364(root …	ko00052(Galactose metabolism);ko00600(Sphingolipid metabolism);ko00531(Glycosaminoglycan degradation);ko00604(Glycosphingolipid biosynthesis - ganglio series);ko00511(Other glycan degradation)
ath-MIR169g-p5_2ss7AG19GA	CSS0027990.1	CSS0027990	CSS0027990	BZIP transcription factor family protein [Theobroma cacao]	186-204	2.5	GO:0005515(protein binding)	ko04075(Plant hormone signal transduction)
ath-MIR169g-p5_2ss7AG19GA	CSS0018134.1	CSS0018134	CSS0018134	acyl transferase 4 [Populus trichocarpa]	288-306	1.5	GO:0005737(cytoplasm);GO:0016740(transferase activity)
ath-MIR169g-p5_2ss7AG19GA	CSS0023211.1	CSS0023211	CSS0023211	WRKY transcription factor 23 [Camellia sinensis]	905-923	2.5	GO:0003700(DNA binding transcription factor activity);GO:0005634(nucleus);GO:0006351(transcription, DNA-templated);GO:0006355(regulation of transcription, DNA-templated);GO:0009624(response to nematode);GO:0009733(response to auxin);GO:0043565(sequence-specific DNA binding)	ko04016(MAPK signaling pathway - plant);ko04626(Plant-pathogen interaction)
ath-MIR169g-p5_2ss7AG19GA	CSS0033465.1	CSS0033465	CSS0033465	Phospholipase A I like [Actinidia chinensis var. chinensis]	228-245	2	GO:0004620(phospholipase activity);GO:0005634(nucleus);GO:0009620(response to fungus);GO:0009695(jasmonic acid biosynthetic process);GO:0047714(galactolipase activity)
ath-MIR169g-p5_2ss7AG19GA	CSS0023418.1	CSS0023418	CSS0023418	PREDICTED: transcription factor bHLH112 isoform X1 [Vitis vinifera]	337-355	2	GO:0001046(core promoter sequence-specific DNA binding);GO:0001228(transcriptional activator activity, RNA polymerase II transcription regulatory region sequence-specific DNA binding);GO:0005634(nucleus);GO:0006366(transcription by RNA polymerase II)
ath-MIR169g-p5_2ss7AG19GA	CSS0019130.1	CSS0019130	CSS0019130	L10-interacting MYB domain-containing protein [Actinidia chinensis var. chinensis]	1578-1596	2.5	GO:0003674(molecular_function);GO:0005634(nucleus);GO:0031347(regulation of defense response)
ath-MIR169g-p5_2ss7AG19GA	CSS0009761.1	CSS0009761	CSS0009761	Gamma-tubulin complex component like [Actinidia chinensis var. chinensis]	65-83	2.5	GO:0000923(equatorial microtubule organizing center);GO:0000930(gamma-tubulin complex);GO:0005200(structural constituent of cytoskeleton);GO:0005813(centrosome);GO:0005816(spindle pole body);GO:0031122(cytoplasmic microtubule organization);GO:0043015(gamma-tubulin binding);GO:0051011(microtubule minus-end binding);GO:0051298(centrosome duplication);GO:0051415(microtubule nucleation by interphase …
ath-MIR169g-p5_2ss7AG19GA	CSS0044125.1	CSS0044125	CSS0044125	peptidyl-prolyl cis-trans isomerase FKBP17-1, chloroplastic-like isoform X3 [Coffea arabica]	94-113	2.5	GO:0003755(peptidyl-prolyl cis-trans isomerase activity);GO:0005528(FK506 binding);GO:0005789(endoplasmic reticulum membrane);GO:0061077(chaperone-mediated protein folding)
ath-MIR169g-p5_2ss7AG19GA	CSS0001598.1	CSS0001598	CSS0001598	Protein FAM216B like [Actinidia chinensis var. chinensis]	35-53	2	-
ath-MIR169g-p5_2ss7AG19GA	CSS0018404.1	CSS0018404	CSS0018404	Dicarboxylate transporter 1 like [Actinidia chinensis var. chinensis]	122-141	2	GO:0015131(oxaloacetate transmembrane transporter activity);GO:0015140(malate transmembrane transporter activity);GO:0016021(integral component of membrane);GO:0071423(malate transmembrane transport)
ath-MIR169g-p5_2ss7AG19GA	CSS0018081.1	CSS0018081	CSS0018081	Calcium-transporting ATPase [Actinidia chinensis var. chinensis]	271-288	2.5	GO:0005388(calcium-transporting ATPase activity);GO:0005887(integral component of plasma membrane);GO:0043231(intracellular membrane-bounded organelle)
ath-MIR169g-p5_2ss7AG19GA	CSS0048802.1	CSS0048802	CSS0048802	F-box/LRR-repeat protein [Actinidia chinensis var. chinensis]	185-202	2.5	-
ath-MIR169g-p5_2ss7AG19GA	CSS0030604.1	CSS0030604	CSS0030604	Transcription factor bHLH130 like [Actinidia chinensis var. chinensis]	435-453	2	GO:0001046(core promoter sequence-specific DNA binding);GO:0001228(transcriptional activator activity, RNA polymerase II transcription regulatory region sequence-specific DNA binding);GO:0005634(nucleus);GO:0006366(transcription by RNA polymerase II)	ko04075(Plant hormone signal transduction);ko04712(Circadian rhythm - plant)
ath-MIR169g-p5_2ss7AG19GA	CSS0019969.1	CSS0019969	CSS0019969	Golgi apparatus membrane protein [Actinidia chinensis var. chinensis]	183-200	2	GO:0009507(chloroplast);GO:0009706(chloroplast inner membrane);GO:0009941(chloroplast envelope);GO:0016021(integral component of membrane)
ath-MIR169g-p5_2ss7AG19GA	CSS0000699.1	CSS0000699	CSS0000699	Golgi apparatus membrane protein [Actinidia chinensis var. chinensis]	176-193	2	GO:0009507(chloroplast);GO:0009706(chloroplast inner membrane);GO:0009941(chloroplast envelope);GO:0016021(integral component of membrane)
ath-MIR169g-p5_2ss7AG19GA	CSS0027617.1	CSS0027617	CSS0027617	unnamed protein product, partial [Vitis vinifera]	235-253	2.5	GO:0004561(alpha-N-acetylglucosaminidase activity);GO:0005773(vacuole);GO:0008152(metabolic process);GO:0009507(chloroplast);GO:0009793(embryo development ending in seed dormancy);GO:0051781(positive regulation of cell division)	ko00531(Glycosaminoglycan degradation)
ath-MIR169g-p5_2ss7AG19GA	CSS0011778.1	CSS0011778	CSS0011778	Protein kinase [Actinidia chinensis var. chinensis]	10-28	2	GO:0000245(spliceosomal complex assembly);GO:0004672(protein kinase activity);GO:0004674(protein serine/threonine kinase activity);GO:0005634(nucleus);GO:0005737(cytoplasm);GO:0006468(protein phosphorylation);GO:0006979(response to oxidative stress);GO:0016301(kinase activity);GO:0035556(intracellular signal transduction);GO:0050684(regulation of mRNA processing)
ath-MIR169g-p5_2ss7AG19GA	CSS0040701.1	CSS0040701	CSS0040701	Hypothetical protein [Arabidopsis thaliana]	1358-1376	2.5	GO:0005739(mitochondrion)	ko00230(Purine metabolism);ko00240(Pyrimidine metabolism);ko03020(RNA polymerase)
ath-MIR169g-p5_2ss7AG19GA	CSS0012429.1	CSS0012429	CSS0012429	protein SUPPRESSOR OF K(+) TRANSPORT GROWTH DEFECT 1 isoform X1 [Olea europaea var. sylvestris]	258-276	2.5	GO:0005634(nucleus);GO:0007033(vacuole organization);GO:0008568(microtubule-severing ATPase activity);GO:0031122(cytoplasmic microtubule organization)	ko04144(Endocytosis)
ath-MIR169g-p5_2ss7AG19GA	CSS0025557.1	CSS0025557	CSS0025557	Acylamino-acid-releasing enzyme like [Actinidia chinensis var. chinensis]	75-92	2	GO:0005634(nucleus);GO:0005737(cytoplasm);GO:0005773(vacuole);GO:0005829(cytosol);GO:0006508(proteolysis);GO:0009507(chloroplast);GO:0051289(protein homotetramerization);GO:0070009(serine-type aminopeptidase activity)
ath-MIR169g-p5_2ss7AG19GA	CSS0033373.1	CSS0033373	CSS0033373	Nudix hydrolase [Actinidia chinensis var. chinensis]	158-176	2	GO:0044715(8-oxo-dGDP phosphatase activity)
ath-MIR169g-p5_2ss7AG19GA	CSS0027452.1	CSS0027452	CSS0027452	VIN3-like protein [Actinidia chinensis var. chinensis]	2410-2427	2.5	GO:0005515(protein binding);GO:0005634(nucleus);GO:0005677(chromatin silencing complex);GO:0006351(transcription, DNA-templated);GO:0006355(regulation of transcription, DNA-templated);GO:0009409(response to cold);GO:0009908(flower development);GO:0009909(regulation of flower development);GO:0010048(vernalization response);GO:0016571(histone methylation);GO:0016607(nuclear speck);GO:0031062(positi…
ath-MIR169g-p5_2ss7AG19GA	CSS0037069.1	CSS0037069	CSS0037069	Serine/threonine protein like [Actinidia chinensis var. chinensis]	1-18	2.5	GO:0000159(protein phosphatase type 2A complex);GO:0005737(cytoplasm);GO:0007165(signal transduction);GO:0019888(protein phosphatase regulator activity)	ko03015(mRNA surveillance pathway)
ath-MIR169g-p5_2ss7AG19GA	CSS0048213.1	CSS0048213	CSS0048213	copia-type reverse transcriptase-like protein [Arabidopsis thaliana]	1242-1259	2.5	GO:0003723(RNA binding);GO:0004525(ribonuclease III activity);GO:0005634(nucleus);GO:0005737(cytoplasm);GO:0016442(RISC complex);GO:0030422(production of siRNA involved in RNA interference)	ko00230(Purine metabolism);ko00240(Pyrimidine metabolism);ko03020(RNA polymerase)
ath-MIR169g-p5_2ss7AG19GA	CSS0044946.1	CSS0044946	CSS0044946	Peptide chain release factor 1 like [Actinidia chinensis var. chinensis]	633-650	2	-
ath-MIR169g-p5_2ss7AG19GA	CSS0019726.1	CSS0019726	CSS0019726	PREDICTED: peptidyl-prolyl cis-trans isomerase FKBP17-1, chloroplastic-like isoform X2 [Nicotiana tabacum]	94-113	2.5	GO:0003755(peptidyl-prolyl cis-trans isomerase activity);GO:0005528(FK506 binding);GO:0005789(endoplasmic reticulum membrane);GO:0061077(chaperone-mediated protein folding)
ath-MIR169g-p5_2ss7AG19GA	CSS0004575.1	CSS0004575	CSS0004575	PREDICTED: zinc finger protein ZAT5 [Vitis vinifera]	888-906	2.5	GO:0003700(DNA binding transcription factor activity);GO:0005634(nucleus);GO:0043565(sequence-specific DNA binding);GO:0044212(transcription regulatory region DNA binding)
ath-MIR169g-p5_2ss7AG19GA	CSS0020993.1	CSS0020993	CSS0020993	PREDICTED: zinc finger protein ZAT5 [Vitis vinifera]	802-820	2.5	GO:0003700(DNA binding transcription factor activity);GO:0005634(nucleus);GO:0043565(sequence-specific DNA binding);GO:0044212(transcription regulatory region DNA binding)
ath-MIR169g-p5_2ss7AG19GA	CSS0035634.1	CSS0035634	CSS0035634	PREDICTED: uncharacterized protein LOC100268160 [Vitis vinifera]	9-26	2.5	GO:0005739(mitochondrion);GO:0008150(biological_process)
ath-MIR169g-p5_2ss7AG19GA	CSS0050449.1	CSS0050449	CSS0050449	GATA transcription factor [Actinidia chinensis var. chinensis]	355-374	2.5	GO:0000977(RNA polymerase II regulatory region sequence-specific DNA binding);GO:0001085(RNA polymerase II transcription factor binding);GO:0001228(transcriptional activator activity, RNA polymerase II transcription regulatory region sequence-specific DNA binding);GO:0003682(chromatin binding);GO:0005634(nucleus);GO:0005667(transcription factor complex);GO:0030154(cell differentiation)
ath-MIR169g-p5_2ss7AG19GA	CSS0047635.1	CSS0047635	CSS0047635	Leukocyte receptor cluster member like [Actinidia chinensis var. chinensis]	225-242	2.5	GO:0003674(molecular_function);GO:0008150(biological_process);GO:0009507(chloroplast)
ath-MIR169g-p5_2ss7AG19GA	CSS0041005.1	CSS0041005	CSS0041005	Alpha-L-fucosidase [Actinidia chinensis var. chinensis]	137-156	2.5	GO:0005773(vacuole)	ko00511(Other glycan degradation)
ath-MIR169g-p5_2ss7AG19GA	CSS0005629.1	CSS0005629	CSS0005629	Leukocyte receptor cluster member like [Actinidia chinensis var. chinensis]	202-219	2	GO:0003674(molecular_function);GO:0008150(biological_process);GO:0009507(chloroplast)
ath-MIR169g-p5_2ss7AG19GA	CSS0045964.1	CSS0045964	CSS0045964	Alpha-L-fucosidase [Actinidia chinensis var. chinensis]	115-134	2.5	GO:0005773(vacuole)	ko00511(Other glycan degradation)
ath-MIR169g-p5_2ss7AG19GA	CSS0005897.1	CSS0005897	CSS0005897	lactoylglutathione lyase isoform X1 [Prunus persica]	203-220	2.5	GO:0004462(lactoylglutathione lyase activity);GO:0005516(calmodulin binding);GO:0005829(cytosol);GO:0005975(carbohydrate metabolic process);GO:0009507(chloroplast);GO:0019243(methylglyoxal catabolic process to D-lactate via S-lactoyl-glutathione);GO:0046686(response to cadmium ion);GO:0046872(metal ion binding)	ko00620(Pyruvate metabolism)
ath-MIR169g-p5_2ss7AG19GA	CSS0037100.1	CSS0037100	CSS0037100	GATA transcription factor [Actinidia chinensis var. chinensis]	364-383	2.5	GO:0000977(RNA polymerase II regulatory region sequence-specific DNA binding);GO:0001085(RNA polymerase II transcription factor binding);GO:0001228(transcriptional activator activity, RNA polymerase II transcription regulatory region sequence-specific DNA binding);GO:0003682(chromatin binding);GO:0005634(nucleus);GO:0005667(transcription factor complex);GO:0030154(cell differentiation)
ath-MIR169g-p5_2ss7AG19GA	CSS0040389.1	CSS0040389	CSS0040389	Hypothetical protein [Arabidopsis thaliana]	1350-1367	2.5	GO:0004596(peptide alpha-N-acetyltransferase activity);GO:0005737(cytoplasm);GO:0017196(N-terminal peptidyl-methionine acetylation)	ko00230(Purine metabolism);ko00240(Pyrimidine metabolism);ko03020(RNA polymerase)
ath-MIR169g-p5_2ss7AG19GA	CSS0005935.1	CSS0005935	CSS0005935	CTP synthase [Actinidia chinensis var. chinensis]	233-251	2.5	GO:0003883(CTP synthase activity);GO:0005524(ATP binding);GO:0005737(cytoplasm);GO:0005829(cytosol);GO:0009793(embryo development ending in seed dormancy);GO:0044210('de novo' CTP biosynthetic process);GO:0046686(response to cadmium ion)	ko00240(Pyrimidine metabolism)
ath-MIR169g-p5_2ss7AG19GA	CSS0038995.1	CSS0038995	CSS0038995	aquaporin protein 11 [Camellia sinensis]	1339-1357	1.5	GO:0005773(vacuole);GO:0005887(integral component of plasma membrane);GO:0009506(plasmodesma);GO:0009992(cellular water homeostasis);GO:0015250(water channel activity);GO:0015254(glycerol channel activity);GO:0034220(ion transmembrane transport)
ath-MIR169g-p5_2ss7AG19GA	CSS0003530.1	CSS0003530	CSS0003530	Ethylene-responsive transcription factor [Actinidia chinensis var. chinensis]	679-698	2.5	GO:0003677(DNA binding);GO:0003700(DNA binding transcription factor activity);GO:0005515(protein binding);GO:0005634(nucleus);GO:0006351(transcription, DNA-templated);GO:0006355(regulation of transcription, DNA-templated);GO:0007275(multicellular organism development);GO:0009873(ethylene-activated signaling pathway);GO:0043565(sequence-specific DNA binding);GO:0050832(defense response to fungus)	ko03040(Spliceosome)
ath-MIR169g-p5_2ss7AG19GA	CSS0006575.1	CSS0006575	CSS0006575	putative lipid-binding protein At4g00165 [Rosa chinensis]	40-58	2	GO:0005576(extracellular region);GO:0006869(lipid transport);GO:0008289(lipid binding)
ath-MIR169g-p5_2ss7AG19GA	CSS0014881.1	CSS0014881	CSS0014881	putative lipid-binding protein At4g00165 [Rosa chinensis]	33-51	2	GO:0005576(extracellular region);GO:0006869(lipid transport);GO:0008289(lipid binding)
ath-MIR169g-p5_2ss7AG19GA	CSS0004786.1	CSS0004786	CSS0004786	Phototropin-1 like [Actinidia chinensis var. chinensis]	137-155	2.5	GO:0004674(protein serine/threonine kinase activity);GO:0005634(nucleus);GO:0005737(cytoplasm);GO:0005886(plasma membrane);GO:0035556(intracellular signal transduction)
ath-MIR169g-p5_2ss7AG19GA	CSS0007810.1	CSS0007810	CSS0007810	GTP diphosphokinase [Actinidia chinensis var. chinensis]	142-160	2.5	GO:0008728(GTP diphosphokinase activity);GO:0008893(guanosine-3',5'-bis(diphosphate) 3'-diphosphatase activity);GO:0009507(chloroplast);GO:0015969(guanosine tetraphosphate metabolic process);GO:0042594(response to starvation)
ath-MIR169g-p5_2ss7AG19GA	CSS0014963.1	CSS0014963	CSS0014963	Hypothetical protein [Arabidopsis thaliana]	1340-1358	2.5	GO:0004832(valine-tRNA ligase activity);GO:0005829(cytosol);GO:0006438(valyl-tRNA aminoacylation)	ko00230(Purine metabolism);ko00240(Pyrimidine metabolism);ko03020(RNA polymerase)
ath-MIR169g-p5_2ss7AG19GA	CSS0003444.1	CSS0003444	CSS0003444	PREDICTED: O-glucosyltransferase rumi homolog [Vitis vinifera]	26-44	2.5	GO:0006664(glycolipid metabolic process);GO:0012505(endomembrane system);GO:0046527(glucosyltransferase activity)	ko00514(Other types of O-glycan biosynthesis)
ath-MIR169g-p5_2ss7AG19GA	CSS0039401.1	CSS0039401	CSS0039401	High mobility group B protein [Actinidia chinensis var. chinensis]	1086-1104	2.5	GO:0003677(DNA binding);GO:0003682(chromatin binding);GO:0003700(DNA binding transcription factor activity);GO:0005515(protein binding);GO:0005634(nucleus);GO:0006338(chromatin remodeling);GO:0006351(transcription, DNA-templated);GO:0006355(regulation of transcription, DNA-templated)
ath-MIR169g-p5_2ss7AG19GA	CSS0008582.1	CSS0008582	CSS0008582	Casein kinase 1-like protein [Actinidia chinensis var. chinensis]	30-48	2	GO:0004674(protein serine/threonine kinase activity);GO:0005634(nucleus);GO:0005737(cytoplasm);GO:0006897(endocytosis);GO:0008360(regulation of cell shape);GO:0016055(Wnt signaling pathway);GO:0018105(peptidyl-serine phosphorylation)
ath-MIR169g-p5_2ss7AG19GA	CSS0033972.1	CSS0033972	CSS0033972	U-box domain-containing protein [Actinidia chinensis var. chinensis]	974-992	2	GO:0005634(nucleus);GO:0005737(cytoplasm)	ko04075(Plant hormone signal transduction)
ath-MIR169g-p5_2ss7AG19GA	CSS0030037.1	CSS0030037	CSS0030037	Rust resistance kinase Lr10 [Vitis vinifera]	509-527	2	GO:0005886(plasma membrane)
ath-MIR169g-p5_2ss7AG19GA	CSS0034665.1	CSS0034665	CSS0034665	Beta-fructofuranosidase, insoluble isoenzyme like [Actinidia chinensis var. chinensis]	38-56	2.5	GO:0004553(hydrolase activity, hydrolyzing O-glycosyl compounds);GO:0004564(beta-fructofuranosidase activity);GO:0004575(sucrose alpha-glucosidase activity);GO:0005515(protein binding);GO:0005576(extracellular region);GO:0005618(cell wall);GO:0005886(plasma membrane);GO:0005975(carbohydrate metabolic process);GO:0009611(response to wounding);GO:0048046(apoplast);GO:0050832(defense response to fun…	ko00052(Galactose metabolism);ko00500(Starch and sucrose metabolism)
ath-MIR169g-p5_2ss7AG19GA	CSS0019229.1	CSS0019229	CSS0019229	Protein HOTHEAD like [Actinidia chinensis var. chinensis]	244-262	2.5	GO:0005576(extracellular region);GO:0007267(cell-cell signaling);GO:0009553(embryo sac development);GO:0010430(fatty acid omega-oxidation);GO:0016614(oxidoreductase activity, acting on CH-OH group of donors);GO:0016832(aldehyde-lyase activity);GO:0046593(mandelonitrile lyase activity);GO:0050660(flavin adenine dinucleotide binding);GO:0055114(oxidation-reduction process)	ko00073(Cutin, suberine and wax biosynthesis)
ath-MIR169g-p5_2ss7AG19GA	CSS0008560.1	CSS0008560	CSS0008560	PREDICTED: ATP-dependent zinc metalloprotease FTSH 10, mitochondrial-like isoform X2 [Juglans regia]	2-20	2.5	GO:0004176(ATP-dependent peptidase activity);GO:0005743(mitochondrial inner membrane);GO:0008053(mitochondrial fusion);GO:0008237(metallopeptidase activity);GO:0009535(chloroplast thylakoid membrane);GO:0034982(mitochondrial protein processing);GO:0042407(cristae formation);GO:0045041(protein import into mitochondrial intermembrane space)
ath-MIR169g-p5_2ss7AG19GA	CSS0046245.1	CSS0046245	CSS0046245	PREDICTED: structure-specific endonuclease subunit SLX1 [Nelumbo nucifera]	245-264	2	GO:0004518(nuclease activity);GO:0005622(intracellular);GO:0005634(nucleus);GO:0006281(DNA repair)
ath-MIR169g-p5_2ss7AG19GA	CSS0009873.1	CSS0009873	CSS0009873	Inactive purple acid phosphatase 27 precursor [Actinidia chinensis var. chinensis]	87-104	2	GO:0003993(acid phosphatase activity);GO:0004722(protein serine/threonine phosphatase activity);GO:0005576(extracellular region);GO:0016311(dephosphorylation);GO:0046872(metal ion binding)
ath-MIR169g-p5_2ss7AG19GA	CSS0001566.1	CSS0001566	CSS0001566	gibberellin 2-oxidase 4 [Camellia sinensis]	446-464	2.5	GO:0009416(response to light stimulus);GO:0045487(gibberellin catabolic process);GO:0052634(C-19 gibberellin 2-beta-dioxygenase activity)	ko00904(Diterpenoid biosynthesis)
ath-MIR169g-p5_2ss7AG19GA	CSS0029248.1	CSS0029248	CSS0029248	ORMDL protein [Actinidia chinensis var. chinensis]	88-106	2.5	GO:0005515(protein binding);GO:0005739(mitochondrion);GO:0005783(endoplasmic reticulum);GO:0006457(protein folding);GO:0006979(response to oxidative stress);GO:0010150(leaf senescence);GO:0016021(integral component of membrane);GO:0030148(sphingolipid biosynthetic process);GO:0034976(response to endoplasmic reticulum stress);GO:0035339(SPOTS complex);GO:0042742(defense response to bacterium);GO:0…
ath-MIR169g-p5_2ss7AG19GA	CSS0013796.1	CSS0013796	CSS0013796	Receptor-like protein kinase BRI1-like [Actinidia chinensis var. chinensis]	211-229	2.5	GO:0004672(protein kinase activity);GO:0004674(protein serine/threonine kinase activity);GO:0004714(transmembrane receptor protein tyrosine kinase activity);GO:0005496(steroid binding);GO:0005524(ATP binding);GO:0005886(plasma membrane);GO:0016021(integral component of membrane)	ko04075(Plant hormone signal transduction)
ath-MIR169g-p5_2ss7AG19GA	CSS0004303.1	CSS0004303	CSS0004303	Farnesylcysteine lyase [Actinidia chinensis var. chinensis]	101-119	2.5	GO:0001735(prenylcysteine oxidase activity);GO:0005774(vacuolar membrane);GO:0030327(prenylated protein catabolic process);GO:0030328(prenylcysteine catabolic process)	ko00900(Terpenoid backbone biosynthesis)
ath-MIR169g-p5_2ss7AG19GA	CSS0049426.1	CSS0049426	CSS0049426	Transcription factor bHLH51 like [Actinidia chinensis var. chinensis]	184-202	1.5	GO:0005634(nucleus)
ath-MIR169g-p5_2ss7AG19GA	CSS0033817.1	CSS0033817	CSS0033817	disease resistance protein At4g27190-like isoform X1 [Durio zibethinus]	2594-2612	2.5	GO:0005524(ATP binding);GO:0005739(mitochondrion);GO:0006952(defense response);GO:0043531(ADP binding)	ko04626(Plant-pathogen interaction)
ath-MIR169g-p5_2ss7AG19GA	CSS0033602.1	CSS0033602	CSS0033602	hypothetical protein CEY00_Acc12681 [Actinidia chinensis var. chinensis]	806-823	2	GO:0003674(molecular_function);GO:0005634(nucleus);GO:0009910(negative regulation of flower development);GO:0016571(histone methylation)
ath-MIR169g-p5_2ss7AG19GA	CSS0019932.1	CSS0019932	CSS0019932	NA	56-73	2	-
ath-MIR169g-p5_2ss7AG19GA	CSS0048872.1	CSS0048872	CSS0048872	UDP-rhamnose:rhamnosyltransferase [Actinidia chinensis var. chinensis]	1518-1535	2.5	GO:0009813(flavonoid biosynthetic process);GO:0043231(intracellular membrane-bounded organelle);GO:0052696(flavonoid glucuronidation);GO:0080043(quercetin 3-O-glucosyltransferase activity);GO:0080044(quercetin 7-O-glucosyltransferase activity)
ath-MIR169g-p5_2ss7AG19GA	CSS0013444.1	CSS0013444	CSS0013444	GATA transcription factor [Actinidia chinensis var. chinensis]	1087-1104	2.5	GO:0000977(RNA polymerase II regulatory region sequence-specific DNA binding);GO:0001085(RNA polymerase II transcription factor binding);GO:0001228(transcriptional activator activity, RNA polymerase II transcription regulatory region sequence-specific DNA binding);GO:0003682(chromatin binding);GO:0005634(nucleus);GO:0005667(transcription factor complex);GO:0030154(cell differentiation)
ath-MIR169g-p5_2ss7AG19GA	CSS0027308.1	CSS0027308	CSS0027308	Protein FAR1-RELATED SEQUENCE 10 [Actinidia chinensis var. chinensis]	136-155	2.5	GO:0005634(nucleus);GO:0006355(regulation of transcription, DNA-templated);GO:0008270(zinc ion binding);GO:0009639(response to red or far red light)
ath-MIR169g-p5_2ss7AG19GA	CSS0047976.1	CSS0047976	CSS0047976	IST1 like [Actinidia chinensis var. chinensis]	136-154	2.5	GO:0005737(cytoplasm);GO:0006979(response to oxidative stress);GO:0015031(protein transport)	ko04144(Endocytosis)
ath-MIR169g-p5_2ss7AG19GA	CSS0025243.1	CSS0025243	CSS0025243	Rho GTPase-activating protein [Actinidia chinensis var. chinensis]	252-271	1.5	GO:0005096(GTPase activator activity);GO:0005737(cytoplasm);GO:0005886(plasma membrane);GO:0007165(signal transduction);GO:0007275(multicellular organism development);GO:0009531(secondary cell wall);GO:0009664(plant-type cell wall organization)
ath-MIR169g-p5_2ss7AG19GA	CSS0048410.1	CSS0048410	CSS0048410	Desmoplakin like [Actinidia chinensis var. chinensis]	115-133	2.5	-
ath-MIR169g-p5_2ss7AG19GA	CSS0017691.1	CSS0017691	CSS0017691	Transcription termination factor like [Actinidia chinensis var. chinensis]	101-119	2	GO:0003690(double-stranded DNA binding);GO:0006355(regulation of transcription, DNA-templated);GO:0009507(chloroplast);GO:0016020(membrane)
ath-MIR169g-p5_2ss7AG19GA	CSS0009695.1	CSS0009695	CSS0009695	Transcription termination factor like [Actinidia chinensis var. chinensis]	101-119	2	GO:0003690(double-stranded DNA binding);GO:0006355(regulation of transcription, DNA-templated);GO:0009507(chloroplast);GO:0016020(membrane)
ath-MIR169g-p5_2ss7AG19GA	CSS0041782.1	CSS0041782	CSS0041782	Transcription termination factor like [Actinidia chinensis var. chinensis]	68-86	2.5	GO:0003690(double-stranded DNA binding);GO:0006355(regulation of transcription, DNA-templated);GO:0009507(chloroplast);GO:0016020(membrane)
ath-MIR169g-p5_2ss7AG19GA	CSS0000075.1	CSS0000075	CSS0000075	Flocculation protein [Actinidia chinensis var. chinensis]	838-857	2.5	GO:0005634(nucleus);GO:0008150(biological_process)
ath-MIR169g-p5_2ss7AG19GA	CSS0005141.1	CSS0005141	CSS0005141	protein MIZU-KUSSEI 1-like [Herrania umbratica]	216-235	2	GO:0003674(molecular_function);GO:0005634(nucleus);GO:0008150(biological_process)
ath-MIR169g-p5_2ss7AG19GA	CSS0039929.1	CSS0039929	CSS0039929	galactan beta-1,4-galactosyltransferase GALS1 [Sesamum indicum]	35-53	2	GO:0000139(Golgi membrane);GO:0005794(Golgi apparatus);GO:0016021(integral component of membrane);GO:0042546(cell wall biogenesis);GO:0045489(pectin biosynthetic process);GO:0048531(beta-1,3-galactosyltransferase activity);GO:0071555(cell wall organization)
ath-MIR169g-p5_2ss7AG19GA	CSS0002748.1	CSS0002748	CSS0002748	Transcription termination factor like [Actinidia chinensis var. chinensis]	101-119	2	GO:0003690(double-stranded DNA binding);GO:0006355(regulation of transcription, DNA-templated);GO:0009507(chloroplast);GO:0016020(membrane)
ath-MIR169g-p5_2ss7AG19GA	CSS0005639.1	CSS0005639	CSS0005639	E3 ubiquitin-protein ligase LUL4 [Actinidia chinensis var. chinensis]	704-722	2.5	GO:0005516(calmodulin binding);GO:0005634(nucleus);GO:0008270(zinc ion binding)
ath-MIR169g-p5_2ss7AG19GA	CSS0047531.1	CSS0047531	CSS0047531	Protein YeeZ like [Actinidia chinensis var. chinensis]	162-179	2	GO:0009507(chloroplast);GO:0009570(chloroplast stroma)
ath-MIR169g-p5_2ss7AG19GA	CSS0007030.1	CSS0007030	CSS0007030	Chaperone protein like [Actinidia chinensis var. chinensis]	11-29	2	GO:0005524(ATP binding);GO:0009507(chloroplast);GO:0009570(chloroplast stroma);GO:0009941(chloroplast envelope);GO:0016887(ATPase activity);GO:0019538(protein metabolic process);GO:0034214(protein hexamerization);GO:0042803(protein homodimerization activity)
ath-MIR169g-p5_2ss7AG19GA	CSS0029450.1	CSS0029450	CSS0029450	Chaperone protein like [Actinidia chinensis var. chinensis]	644-662	2	GO:0005524(ATP binding);GO:0009507(chloroplast);GO:0009570(chloroplast stroma);GO:0009941(chloroplast envelope);GO:0016887(ATPase activity);GO:0019538(protein metabolic process);GO:0034214(protein hexamerization);GO:0042803(protein homodimerization activity)
ath-MIR169g-p5_2ss7AG19GA	CSS0001258.1	CSS0001258	CSS0001258	PREDICTED: mitochondrial phosphate carrier protein 3, mitochondrial [Vitis vinifera]	175-193	2.5	GO:0003735(structural constituent of ribosome);GO:0006412(translation)
ath-MIR169g-p5_2ss7AG19GA	CSS0024217.1	CSS0024217	CSS0024217	Mitochondrial phosphate carrier protein like [Actinidia chinensis var. chinensis]	244-263	2	GO:0003735(structural constituent of ribosome);GO:0006412(translation)
ath-MIR169g-p5_2ss7AG19GA	CSS0010948.1	CSS0010948	CSS0010948	F-box protein At5g07610-like [Rosa chinensis]	88-107	2	GO:0004842(ubiquitin-protein transferase activity);GO:0019005(SCF ubiquitin ligase complex);GO:0031146(SCF-dependent proteasomal ubiquitin-dependent protein catabolic process)
ath-MIR169g-p5_2ss7AG19GA	CSS0002260.1	CSS0002260	CSS0002260	nuclear pore complex protein NUP62-like isoform X2 [Hevea brasiliensis]	210-228	2.5	-
ath-MIR169g-p5_2ss7AG19GA	CSS0024855.1	CSS0024855	CSS0024855	Pentatricopeptide repeat-containing protein [Actinidia chinensis var. chinensis]	35-53	2.5	GO:0003723(RNA binding);GO:0004519(endonuclease activity);GO:0005515(protein binding);GO:0005739(mitochondrion);GO:0006397(mRNA processing);GO:0008270(zinc ion binding);GO:0009507(chloroplast);GO:0016556(mRNA modification);GO:0031425(chloroplast RNA processing);GO:1900865(chloroplast RNA modification)	ko03440(Homologous recombination)
ath-MIR169g-p5_2ss7AG19GA	CSS0026422.1	CSS0026422	CSS0026422	Rust resistance kinase [Actinidia chinensis var. chinensis]	163-181	2.5	GO:0005886(plasma membrane)
ath-MIR169g-p5_2ss7AG19GA	CSS0038323.1	CSS0038323	CSS0038323	Rust resistance kinase [Actinidia chinensis var. chinensis]	163-181	2.5	GO:0005886(plasma membrane)
ath-MIR169g-p5_2ss7AG19GA	CSS0001007.1	CSS0001007	CSS0001007	NDR1/HIN1-Like protein [Actinidia chinensis var. chinensis]	227-246	2.5	GO:0003674(molecular_function);GO:0005829(cytosol);GO:0005886(plasma membrane);GO:0006970(response to osmotic stress);GO:0009737(response to abscisic acid);GO:0009738(abscisic acid-activated signaling pathway);GO:0010116(positive regulation of abscisic acid biosynthetic process);GO:0016021(integral component of membrane);GO:1902074(response to salt)
ath-MIR169g-p5_2ss7AG19GA	CSS0005210.1	CSS0005210	CSS0005210	Protein translocase subunit SecA like [Actinidia chinensis var. chinensis]	225-243	2.5	-
ath-MIR169g-p5_2ss7AG19GA	CSS0000101.1	CSS0000101	CSS0000101	50S ribosomal protein [Actinidia chinensis var. chinensis]	45-62	2	GO:0003735(structural constituent of ribosome);GO:0005840(ribosome);GO:0006412(translation);GO:0009507(chloroplast);GO:0009570(chloroplast stroma);GO:0009941(chloroplast envelope);GO:0016020(membrane);GO:0019843(rRNA binding)	ko03010(Ribosome)
ath-MIR169g-p5_2ss7AG19GA	CSS0025682.1	CSS0025682	CSS0025682	Transcription factor bHLH130 like [Actinidia chinensis var. chinensis]	557-575	2	GO:0001046(core promoter sequence-specific DNA binding);GO:0001228(transcriptional activator activity, RNA polymerase II transcription regulatory region sequence-specific DNA binding);GO:0005634(nucleus);GO:0006366(transcription by RNA polymerase II)
ath-MIR169g-p5_2ss7AG19GA	CSS0028033.1	CSS0028033	CSS0028033	LIM domain-containing serine/threonine-protein kinase [Actinidia chinensis var. chinensis]	508-525	2	GO:0003674(molecular_function);GO:0005739(mitochondrion);GO:0008150(biological_process);GO:0016021(integral component of membrane)
ath-MIR169g-p5_2ss7AG19GA	CSS0033472.1	CSS0033472	CSS0033472	Protein argonaute like [Actinidia chinensis var. chinensis]	110-127	2	GO:0003743(translation initiation factor activity);GO:0005515(protein binding);GO:0005737(cytoplasm);GO:0006351(transcription, DNA-templated);GO:0006355(regulation of transcription, DNA-templated);GO:0006417(regulation of translation);GO:0007275(multicellular organism development);GO:0010586(miRNA metabolic process);GO:0031047(gene silencing by RNA);GO:0035019(somatic stem cell population mainten…
ath-MIR169g-p5_2ss7AG19GA	CSS0010251.1	CSS0010251	CSS0010251	Protein BEARSKIN2 [Vitis vinifera]	1125-1142	2.5	GO:0003677(DNA binding);GO:0003700(DNA binding transcription factor activity);GO:0005634(nucleus);GO:0006351(transcription, DNA-templated);GO:0007275(multicellular organism development);GO:0009834(plant-type secondary cell wall biogenesis);GO:0010628(positive regulation of gene expression);GO:0045893(positive regulation of transcription, DNA-templated);GO:0048829(root cap development)	ko03013(RNA transport);ko03015(mRNA surveillance pathway);ko03018(RNA degradation)
ath-MIR169g-p5_2ss7AG19GA	CSS0037722.1	CSS0037722	CSS0037722	Acylamino-acid-releasing enzyme like [Actinidia chinensis var. chinensis]	75-92	2	GO:0005634(nucleus);GO:0005737(cytoplasm);GO:0005773(vacuole);GO:0005829(cytosol);GO:0006508(proteolysis);GO:0009507(chloroplast);GO:0051289(protein homotetramerization);GO:0070009(serine-type aminopeptidase activity)
ath-MIR169g-p5_2ss7AG19GA	CSS0035623.1	CSS0035623	CSS0035623	PREDICTED: DNA repair RAD52-like protein 1, mitochondrial [Ipomoea nil]	38-56	2.5	GO:0000373(Group II intron splicing);GO:0000724(double-strand break repair via homologous recombination);GO:0003677(DNA binding);GO:0003690(double-stranded DNA binding);GO:0003697(single-stranded DNA binding);GO:0005515(protein binding);GO:0005634(nucleus);GO:0005739(mitochondrion);GO:0006281(DNA repair);GO:0050897(cobalt ion binding)
ath-MIR169g-p5_2ss7AG19GA	CSS0040374.1	CSS0040374	CSS0040374	PREDICTED: RNA-binding protein 38 isoform X1 [Theobroma cacao]	2171-2189	2.5	GO:0003723(RNA binding);GO:0003729(mRNA binding);GO:0005576(extracellular region);GO:0008150(biological_process)	ko03040(Spliceosome)
ath-MIR169g-p5_2ss7AG19GA	CSS0020669.1	CSS0020669	CSS0020669	Developmental and secondary metabolism regulator veA like [Actinidia chinensis var. chinensis]	875-893	2	GO:0003674(molecular_function);GO:0005634(nucleus);GO:0008150(biological_process);GO:0016021(integral component of membrane)
ath-MIR169g-p5_2ss7AG19GA	CSS0037137.1	CSS0037137	CSS0037137	urease accessory protein G [Olea europaea var. sylvestris]	87-106	2	GO:0000166(nucleotide binding);GO:0003924(GTPase activity);GO:0005525(GTP binding);GO:0005737(cytoplasm);GO:0006807(nitrogen compound metabolic process);GO:0016020(membrane);GO:0016151(nickel cation binding);GO:0043085(positive regulation of catalytic activity);GO:0046872(metal ion binding);GO:1905182(positive regulation of urease activity)
ath-MIR169g-p5_2ss7AG19GA	CSS0015219.1	CSS0015219	CSS0015219	cyclin B [Camellia sinensis]	1765-1783	2.5	GO:0005515(protein binding);GO:0005634(nucleus);GO:0005737(cytoplasm);GO:0007049(cell cycle);GO:0010332(response to gamma radiation);GO:0016538(cyclin-dependent protein serine/threonine kinase regulator activity);GO:0051301(cell division);GO:0051726(regulation of cell cycle)
ath-MIR169g-p5_2ss7AG19GA	CSS0038088.1	CSS0038088	CSS0038088	E3 ubiquitin-protein like [Actinidia chinensis var. chinensis]	144-162	2.5	GO:0043161(proteasome-mediated ubiquitin-dependent protein catabolic process);GO:0061630(ubiquitin protein ligase activity)
ath-MIR169g-p5_2ss7AG19GA	CSS0013509.1	CSS0013509	CSS0013509	Tyrosine-specific transport protein [Actinidia chinensis var. chinensis]	104-121	2	GO:0005275(amine transmembrane transporter activity);GO:0005886(plasma membrane);GO:0006865(amino acid transport);GO:0009507(chloroplast);GO:0009706(chloroplast inner membrane);GO:0015173(aromatic amino acid transmembrane transporter activity);GO:0015801(aromatic amino acid transport);GO:0016020(membrane)
ath-MIR169g-p5_2ss7AG19GA	CSS0000138.1	CSS0000138	CSS0000138	Peptidyl-tRNA hydrolase [Actinidia chinensis var. chinensis]	27-44	2	GO:0004045(aminoacyl-tRNA hydrolase activity);GO:0005739(mitochondrion);GO:0032543(mitochondrial translation)
ath-MIR169g-p5_2ss7AG19GA	CSS0005073.1	CSS0005073	CSS0005073	transcription factor FAMA-like isoform X1 [Hevea brasiliensis]	114-131	2.5	GO:0003677(DNA binding);GO:0003700(DNA binding transcription factor activity);GO:0005515(protein binding);GO:0005634(nucleus);GO:0006351(transcription, DNA-templated);GO:0010052(guard cell differentiation);GO:0010377(guard cell fate commitment);GO:0010444(guard mother cell differentiation);GO:0045597(positive regulation of cell differentiation);GO:0045893(positive regulation of transcription, DNA…	ko04016(MAPK signaling pathway - plant)
ath-MIR169g-p5_2ss7AG19GA	CSS0034971.1	CSS0034971	CSS0034971	Polygalacturonase [Actinidia chinensis var. chinensis]	54-71	2	GO:0004650(polygalacturonase activity);GO:0005576(extracellular region);GO:0005975(carbohydrate metabolic process)	ko00040(Pentose and glucuronate interconversions)
ath-MIR169g-p5_2ss7AG19GA	CSS0005164.1	CSS0005164	CSS0005164	Protein kinase [Actinidia chinensis var. chinensis]	128-146	2	GO:0000245(spliceosomal complex assembly);GO:0004672(protein kinase activity);GO:0004674(protein serine/threonine kinase activity);GO:0005634(nucleus);GO:0005737(cytoplasm);GO:0006468(protein phosphorylation);GO:0006979(response to oxidative stress);GO:0016301(kinase activity);GO:0035556(intracellular signal transduction);GO:0050684(regulation of mRNA processing)
ath-MIR169g-p5_2ss7AG19GA	CSS0030158.1	CSS0030158	CSS0030158	Hypothetical protein [Arabidopsis thaliana]	1271-1289	2.5	GO:0004596(peptide alpha-N-acetyltransferase activity);GO:0005737(cytoplasm);GO:0017196(N-terminal peptidyl-methionine acetylation)	ko00230(Purine metabolism);ko00240(Pyrimidine metabolism);ko03020(RNA polymerase)
ath-MIR169g-p5_2ss7AG19GA	CSS0002981.1	CSS0002981	CSS0002981	NA	65-83	2.5	-
ath-MIR169g-p5_2ss7AG19GA	CSS0010123.1	CSS0010123	CSS0010123	Protein kinase domain [Macleaya cordata]	284-301	2	GO:0004672(protein kinase activity);GO:0004674(protein serine/threonine kinase activity);GO:0004712(protein serine/threonine/tyrosine kinase activity);GO:0005515(protein binding);GO:0005783(endoplasmic reticulum);GO:0005886(plasma membrane);GO:0006970(response to osmotic stress);GO:0009898(cytoplasmic side of plasma membrane);GO:0016301(kinase activity);GO:0035556(intracellular signal transductio…
ath-MIR169g-p5_2ss7AG19GA	CSS0008603.1	CSS0008603	CSS0008603	unnamed protein product, partial [Vitis vinifera]	50-68	2.5	GO:0004561(alpha-N-acetylglucosaminidase activity);GO:0005773(vacuole);GO:0008152(metabolic process);GO:0009507(chloroplast);GO:0009793(embryo development ending in seed dormancy);GO:0051781(positive regulation of cell division)	ko00531(Glycosaminoglycan degradation)
ath-MIR169g-p5_2ss7AG19GA	CSS0003927.1	CSS0003927	CSS0003927	Prolycopene isomerase [Actinidia chinensis var. chinensis]	2196-2213	2.5	GO:0009507(chloroplast);GO:0009662(etioplast organization);GO:0016117(carotenoid biosynthetic process);GO:0016491(oxidoreductase activity);GO:0031969(chloroplast membrane);GO:0046608(carotenoid isomerase activity);GO:0055114(oxidation-reduction process)	ko00906(Carotenoid biosynthesis)
ath-MIR169g-p5_2ss7AG19GA	CSS0033024.1	CSS0033024	CSS0033024	Protein indeterminate-domain like [Actinidia chinensis var. chinensis]	93-111	2.5	GO:0003676(nucleic acid binding);GO:0003700(DNA binding transcription factor activity);GO:0005515(protein binding);GO:0005634(nucleus);GO:0006351(transcription, DNA-templated);GO:0006355(regulation of transcription, DNA-templated);GO:0008270(zinc ion binding);GO:0009937(regulation of gibberellic acid mediated signaling pathway);GO:0010029(regulation of seed germination);GO:0010431(seed maturation…	ko00052(Galactose metabolism);ko00600(Sphingolipid metabolism);ko00531(Glycosaminoglycan degradation);ko00604(Glycosphingolipid biosynthesis - ganglio series);ko00511(Other glycan degradation)
ath-MIR169g-p5_2ss7AG19GA	CSS0046951.1	CSS0046951	CSS0046951	purple acid phosphatase 2 [Sesamum indicum]	1573-1591	2.5	GO:0003993(acid phosphatase activity);GO:0005615(extracellular space);GO:0030145(manganese ion binding);GO:0046872(metal ion binding)	ko00130(Ubiquinone and other terpenoid-quinone biosynthesis)
ath-MIR169g-p5_2ss7AG19GA	CSS0040503.1	CSS0040503	CSS0040503	probable galacturonosyltransferase 14 isoform X2 [Durio zibethinus]	432-450	2	GO:0000139(Golgi membrane);GO:0005794(Golgi apparatus);GO:0009555(pollen development);GO:0009860(pollen tube growth);GO:0016021(integral component of membrane);GO:0016051(carbohydrate biosynthetic process);GO:0016757(transferase activity, transferring glycosyl groups);GO:0016758(transferase activity, transferring hexosyl groups);GO:0047262(polygalacturonate 4-alpha-galacturonosyltransferase activ…
ath-MIR169g-p5_2ss7AG19GA	CSS0007222.1	CSS0007222	CSS0007222	Glucuronoxylan glucuronosyltransferase F8H [Actinidia chinensis var. chinensis]	101-120	2.5	GO:0003824(catalytic activity);GO:0005768(endosome);GO:0005794(Golgi apparatus);GO:0005802(trans-Golgi network);GO:0008150(biological_process);GO:0016020(membrane)
ath-MIR169g-p5_2ss7AG19GA	CSS0031492.1	CSS0031492	CSS0031492	Pheophytinase [Actinidia chinensis var. chinensis]	238-256	2.5	GO:0016787(hydrolase activity)
ath-MIR169g-p5_2ss7AG19GA	CSS0034685.1	CSS0034685	CSS0034685	MDIS1-interacting receptor like kinase 2-like [Quercus suber]	2375-2393	2.5	GO:0004674(protein serine/threonine kinase activity);GO:0005515(protein binding);GO:0005524(ATP binding);GO:0005634(nucleus);GO:0005886(plasma membrane);GO:0006468(protein phosphorylation);GO:0009506(plasmodesma);GO:0009755(hormone-mediated signaling pathway);GO:0010183(pollen tube guidance);GO:0016020(membrane);GO:0016021(integral component of membrane);GO:0016301(kinase activity);GO:0090406(pol…
ath-MIR169g-p5_2ss7AG19GA	CSS0034685.1	CSS0034685	CSS0034685	MDIS1-interacting receptor like kinase 2-like [Quercus suber]	2350-2369	2	GO:0004674(protein serine/threonine kinase activity);GO:0005515(protein binding);GO:0005524(ATP binding);GO:0005634(nucleus);GO:0005886(plasma membrane);GO:0006468(protein phosphorylation);GO:0009506(plasmodesma);GO:0009755(hormone-mediated signaling pathway);GO:0010183(pollen tube guidance);GO:0016020(membrane);GO:0016021(integral component of membrane);GO:0016301(kinase activity);GO:0090406(pol…
ath-MIR169g-p5_2ss7AG19GA	CSS0011563.1	CSS0011563	CSS0011563	PREDICTED: KUP2 isoform X1 [Vitis vinifera]	2299-2316	2.5	GO:0005886(plasma membrane);GO:0015079(potassium ion transmembrane transporter activity)
ath-MIR169g-p5_2ss7AG19GA	CSS0013638.1	CSS0013638	CSS0013638	WRKY transcription factor 33 [Actinidia chinensis var. chinensis]	268-285	2	GO:0003700(DNA binding transcription factor activity);GO:0005515(protein binding);GO:0005634(nucleus);GO:0006351(transcription, DNA-templated);GO:0006355(regulation of transcription, DNA-templated);GO:0006970(response to osmotic stress);GO:0009408(response to heat);GO:0009409(response to cold);GO:0009414(response to water deprivation);GO:0009651(response to salt stress);GO:0010120(camalexin biosy…	ko04016(MAPK signaling pathway - plant);ko04626(Plant-pathogen interaction)
ath-MIR169g-p5_2ss7AG19GA	CSS0013638.1	CSS0013638	CSS0013638	WRKY transcription factor 33 [Actinidia chinensis var. chinensis]	182-200	2	GO:0003700(DNA binding transcription factor activity);GO:0005515(protein binding);GO:0005634(nucleus);GO:0006351(transcription, DNA-templated);GO:0006355(regulation of transcription, DNA-templated);GO:0006970(response to osmotic stress);GO:0009408(response to heat);GO:0009409(response to cold);GO:0009414(response to water deprivation);GO:0009651(response to salt stress);GO:0010120(camalexin biosy…	ko04016(MAPK signaling pathway - plant);ko04626(Plant-pathogen interaction)
ath-MIR169g-p5_2ss7AG19GA	CSS0037181.1	CSS0037181	CSS0037181	RING finger and transmembrane domain-containing protein [Actinidia chinensis var. chinensis]	82-99	2	GO:0008270(zinc ion binding);GO:0016021(integral component of membrane)
ath-MIR169g-p5_2ss7AG19GA	CSS0016841.1	CSS0016841	CSS0016841	protein SUPPRESSOR OF K(+) TRANSPORT GROWTH DEFECT 1-like [Olea europaea var. sylvestris]	272-290	2.5	GO:0005634(nucleus);GO:0007033(vacuole organization);GO:0008568(microtubule-severing ATPase activity);GO:0031122(cytoplasmic microtubule organization)	ko04144(Endocytosis)
ath-MIR169g-p5_2ss7AG19GA	CSS0022966.1	CSS0022966	CSS0022966	AP2-like ethylene-responsive transcription factor BBM [Vitis vinifera]	2098-2116	1.5	GO:0003677(DNA binding);GO:0003700(DNA binding transcription factor activity);GO:0005634(nucleus);GO:0006351(transcription, DNA-templated);GO:0006355(regulation of transcription, DNA-templated);GO:0007275(multicellular organism development);GO:1905392(plant organ morphogenesis)
ath-MIR169g-p5_2ss7AG19GA	CSS0038046.1	CSS0038046	CSS0038046	Inactive poly [ADP-ribose] polymerase [Actinidia chinensis var. chinensis]	259-276	2.5	GO:0003950(NAD+ ADP-ribosyltransferase activity);GO:0005634(nucleus);GO:0006970(response to osmotic stress);GO:0006979(response to oxidative stress);GO:0009651(response to salt stress);GO:0009793(embryo development ending in seed dormancy);GO:0010102(lateral root morphogenesis);GO:0016363(nuclear matrix);GO:0048573(photoperiodism, flowering)
ath-MIR169g-p5_2ss7AG19GA	CSS0031909.1	CSS0031909	CSS0031909	uncharacterized protein LOC113863724 isoform X1 [Abrus precatorius]	119-137	2.5	-
ath-MIR169g-p5_2ss7AG19GA	CSS0012303.1	CSS0012303	CSS0012303	MDIS1-interacting receptor like kinase [Actinidia chinensis var. chinensis]	695-713	2.5	GO:0004674(protein serine/threonine kinase activity);GO:0005515(protein binding);GO:0005524(ATP binding);GO:0005634(nucleus);GO:0005886(plasma membrane);GO:0006468(protein phosphorylation);GO:0009506(plasmodesma);GO:0009755(hormone-mediated signaling pathway);GO:0010183(pollen tube guidance);GO:0016020(membrane);GO:0016021(integral component of membrane);GO:0016301(kinase activity);GO:0090406(pol…
ath-MIR393a-p5_2ss18GT19AT	CSS0036410.1	CSS0036410	CSS0036410	PREDICTED: glucan endo-1,3-beta-glucosidase 3 isoform X1 [Vitis vinifera]	812-830	2.5	GO:0004553(hydrolase activity, hydrolyzing O-glycosyl compounds);GO:0030247(polysaccharide binding);GO:0046658(anchored component of plasma membrane)	ko00500(Starch and sucrose metabolism)
ath-MIR393a-p5_2ss18GT19AT	CSS0004040.2	CSS0004040	CSS0004040	Protein AUXIN SIGNALING F-BOX like [Actinidia chinensis var. chinensis]	2265-2283	0.5	GO:0000822(inositol hexakisphosphate binding);GO:0009734(auxin-activated signaling pathway)	ko04075(Plant hormone signal transduction)
ath-MIR393a-p5_2ss18GT19AT	CSS0047445.2	CSS0047445	CSS0047445	Phosphatidate phosphatase [Actinidia chinensis var. chinensis]	2391-2409	2.5	GO:0008195(phosphatidate phosphatase activity)	ko00561(Glycerolipid metabolism);ko00564(Glycerophospholipid metabolism)
ath-MIR393a-p5_2ss18GT19AT	CSS0008399.2	CSS0008399	CSS0008399	PREDICTED: probable glycosyltransferase At5g03795 [Vitis vinifera]	563-581	2.2	GO:0003824(catalytic activity);GO:0005768(endosome);GO:0005794(Golgi apparatus);GO:0005802(trans-Golgi network);GO:0006486(protein glycosylation);GO:0016020(membrane);GO:0016757(transferase activity, transferring glycosyl groups)
ath-MIR393a-p5_2ss18GT19AT	CSS0025107.1	CSS0025107	CSS0025107	transport inhibitor response 1 [Camellia sinensis]	1639-1657	0.5	GO:0000822(inositol hexakisphosphate binding);GO:0009734(auxin-activated signaling pathway)	ko04075(Plant hormone signal transduction)
ath-MIR393a-p5_2ss18GT19AT	CSS0028225.2	CSS0028225	CSS0028225	Cyclase-associated protein [Actinidia chinensis var. chinensis]	1740-1758	2	GO:0003779(actin binding);GO:0005829(cytosol);GO:0005886(plasma membrane);GO:0007010(cytoskeleton organization);GO:0007163(establishment or maintenance of cell polarity);GO:0007165(signal transduction);GO:0008154(actin polymerization or depolymerization);GO:0008179(adenylate cyclase binding);GO:0009826(unidimensional cell growth);GO:0030036(actin cytoskeleton organization);GO:0030864(cortical act…
ath-MIR393a-p5_2ss18GT19AT	CSS0042529.1	CSS0042529	CSS0042529	heparan-alpha-glucosaminide N-acetyltransferase [Handroanthus impetiginosus]	1169-1188	2	GO:0008150(biological_process);GO:0016021(integral component of membrane);GO:0016740(transferase activity)	ko00531(Glycosaminoglycan degradation)
ath-MIR393a-p5_2ss18GT19AT	CSS0047444.1	CSS0047444	CSS0047444	transport inhibitor response 1 [Camellia sinensis]	1500-1518	0.5	GO:0000822(inositol hexakisphosphate binding);GO:0009734(auxin-activated signaling pathway)	ko04075(Plant hormone signal transduction)
ath-MIR393a-p5_2ss18GT19AT	CSS0027876.1	CSS0027876	CSS0027876	E3 ubiquitin-protein like [Actinidia chinensis var. chinensis]	2773-2792	2.5	GO:0004674(protein serine/threonine kinase activity);GO:0004842(ubiquitin-protein transferase activity);GO:0005769(early endosome);GO:0005802(trans-Golgi network);GO:0006468(protein phosphorylation);GO:0009788(negative regulation of abscisic acid-activated signaling pathway);GO:0045324(late endosome to vacuole transport)
ath-MIR393a-p5_2ss18GT19AT	CSS0039207.1	CSS0039207	CSS0039207	PREDICTED: protein AUXIN SIGNALING F-BOX 2-like [Nicotiana tomentosiformis]	271-289	1	GO:0000822(inositol hexakisphosphate binding);GO:0009734(auxin-activated signaling pathway)	ko04075(Plant hormone signal transduction)
ath-MIR393a-p5_2ss18GT19AT	CSS0012722.1	CSS0012722	CSS0012722	Flowering time control protein like [Actinidia chinensis var. chinensis]	3541-3559	2	GO:0000398(mRNA splicing, via spliceosome);GO:0003676(nucleic acid binding);GO:0005634(nucleus)
ath-MIR393a-p5_2ss18GT19AT	CSS0022841.1	CSS0022841	CSS0022841	Natterin-3 like [Actinidia chinensis var. chinensis]	453-471	2.5	-
ath-MIR393b-p5_2ss18GT19AT	CSS0036410.1	CSS0036410	CSS0036410	PREDICTED: glucan endo-1,3-beta-glucosidase 3 isoform X1 [Vitis vinifera]	812-830	2.5	GO:0004553(hydrolase activity, hydrolyzing O-glycosyl compounds);GO:0030247(polysaccharide binding);GO:0046658(anchored component of plasma membrane)	ko00500(Starch and sucrose metabolism)
ath-MIR393b-p5_2ss18GT19AT	CSS0004040.2	CSS0004040	CSS0004040	Protein AUXIN SIGNALING F-BOX like [Actinidia chinensis var. chinensis]	2265-2283	0.5	GO:0000822(inositol hexakisphosphate binding);GO:0009734(auxin-activated signaling pathway)	ko04075(Plant hormone signal transduction)
ath-MIR393b-p5_2ss18GT19AT	CSS0047445.2	CSS0047445	CSS0047445	Phosphatidate phosphatase [Actinidia chinensis var. chinensis]	2391-2409	2.5	GO:0008195(phosphatidate phosphatase activity)	ko00561(Glycerolipid metabolism);ko00564(Glycerophospholipid metabolism)
ath-MIR393b-p5_2ss18GT19AT	CSS0008399.2	CSS0008399	CSS0008399	PREDICTED: probable glycosyltransferase At5g03795 [Vitis vinifera]	563-581	2.2	GO:0003824(catalytic activity);GO:0005768(endosome);GO:0005794(Golgi apparatus);GO:0005802(trans-Golgi network);GO:0006486(protein glycosylation);GO:0016020(membrane);GO:0016757(transferase activity, transferring glycosyl groups)
ath-MIR393b-p5_2ss18GT19AT	CSS0025107.1	CSS0025107	CSS0025107	transport inhibitor response 1 [Camellia sinensis]	1639-1657	0.5	GO:0000822(inositol hexakisphosphate binding);GO:0009734(auxin-activated signaling pathway)	ko04075(Plant hormone signal transduction)
ath-MIR393b-p5_2ss18GT19AT	CSS0028225.2	CSS0028225	CSS0028225	Cyclase-associated protein [Actinidia chinensis var. chinensis]	1740-1758	2	GO:0003779(actin binding);GO:0005829(cytosol);GO:0005886(plasma membrane);GO:0007010(cytoskeleton organization);GO:0007163(establishment or maintenance of cell polarity);GO:0007165(signal transduction);GO:0008154(actin polymerization or depolymerization);GO:0008179(adenylate cyclase binding);GO:0009826(unidimensional cell growth);GO:0030036(actin cytoskeleton organization);GO:0030864(cortical act…
ath-MIR393b-p5_2ss18GT19AT	CSS0042529.1	CSS0042529	CSS0042529	heparan-alpha-glucosaminide N-acetyltransferase [Handroanthus impetiginosus]	1169-1188	2	GO:0008150(biological_process);GO:0016021(integral component of membrane);GO:0016740(transferase activity)	ko00531(Glycosaminoglycan degradation)
ath-MIR393b-p5_2ss18GT19AT	CSS0039207.1	CSS0039207	CSS0039207	PREDICTED: protein AUXIN SIGNALING F-BOX 2-like [Nicotiana tomentosiformis]	271-289	1	GO:0000822(inositol hexakisphosphate binding);GO:0009734(auxin-activated signaling pathway)	ko04075(Plant hormone signal transduction)
ath-MIR393b-p5_2ss18GT19AT	CSS0012722.1	CSS0012722	CSS0012722	Flowering time control protein like [Actinidia chinensis var. chinensis]	3541-3559	2	GO:0000398(mRNA splicing, via spliceosome);GO:0003676(nucleic acid binding);GO:0005634(nucleus)
ath-MIR393b-p5_2ss18GT19AT	CSS0047444.1	CSS0047444	CSS0047444	transport inhibitor response 1 [Camellia sinensis]	1500-1518	0.5	GO:0000822(inositol hexakisphosphate binding);GO:0009734(auxin-activated signaling pathway)	ko04075(Plant hormone signal transduction)
ath-MIR393b-p5_2ss18GT19AT	CSS0027876.1	CSS0027876	CSS0027876	E3 ubiquitin-protein like [Actinidia chinensis var. chinensis]	2773-2792	2.5	GO:0004674(protein serine/threonine kinase activity);GO:0004842(ubiquitin-protein transferase activity);GO:0005769(early endosome);GO:0005802(trans-Golgi network);GO:0006468(protein phosphorylation);GO:0009788(negative regulation of abscisic acid-activated signaling pathway);GO:0045324(late endosome to vacuole transport)
ath-MIR393b-p5_2ss18GT19AT	CSS0022841.1	CSS0022841	CSS0022841	Natterin-3 like [Actinidia chinensis var. chinensis]	453-471	2.5	-
ath-miR159a	CSS0022090.1	CSS0022090	CSS0022090	hypothetical protein CEY00_Acc21735 [Actinidia chinensis var. chinensis]	733-753	2.2	-	ko04144(Endocytosis)
ath-miR159a	CSS0042196.1	CSS0042196	CSS0042196	Protein SPOROCYTELESS like [Actinidia chinensis var. chinensis]	359-379	2	-
ath-miR159a	CSS0041304.1	CSS0041304	CSS0041304	Protein SPOROCYTELESS like [Actinidia chinensis var. chinensis]	359-379	2	-
ath-miR159a	CSS0004572.1	CSS0004572	CSS0004572	hypothetical protein CEY00_Acc26439 [Actinidia chinensis var. chinensis]	74-94	2.2	-	ko04144(Endocytosis)
ath-miR159a	CSS0026032.1	CSS0026032	CSS0026032	hypothetical protein CEY00_Acc21735 [Actinidia chinensis var. chinensis]	617-637	2	-	ko04144(Endocytosis)
ath-miR159a	CSS0043675.1	CSS0043675	CSS0043675	Exonuclease [Actinidia chinensis var. chinensis]	333-354	2.5	GO:0008408(3'-5' exonuclease activity)
ath-miR159a	CSS0041768.1	CSS0041768	CSS0041768	Transcription factor GAMYB like [Actinidia chinensis var. chinensis]	1099-1119	1.8	GO:0000981(RNA polymerase II transcription factor activity, sequence-specific DNA binding);GO:0001135(transcription factor activity, RNA polymerase II transcription factor recruiting);GO:0003677(DNA binding);GO:0003700(DNA binding transcription factor activity);GO:0005634(nucleus);GO:0006351(transcription, DNA-templated);GO:0006355(regulation of transcription, DNA-templated);GO:0006357(regulation…
ath-miR159a	CSS0011455.1	CSS0011455	CSS0011455	MDIS1-interacting receptor like kinase [Actinidia chinensis var. chinensis]	354-373	2.5	GO:0004672(protein kinase activity);GO:0004674(protein serine/threonine kinase activity);GO:0005515(protein binding);GO:0005524(ATP binding);GO:0005886(plasma membrane);GO:0006468(protein phosphorylation);GO:0007169(transmembrane receptor protein tyrosine kinase signaling pathway);GO:0009506(plasmodesma);GO:0010067(procambium histogenesis);GO:0010087(phloem or xylem histogenesis);GO:0010183(polle…
ath-miR159a	CSS0009873.1	CSS0009873	CSS0009873	Inactive purple acid phosphatase 27 precursor [Actinidia chinensis var. chinensis]	368-387	2.5	GO:0003993(acid phosphatase activity);GO:0004722(protein serine/threonine phosphatase activity);GO:0005576(extracellular region);GO:0016311(dephosphorylation);GO:0046872(metal ion binding)
ath-miR159a	CSS0019587.1	CSS0019587	CSS0019587	Phosphatidylinositol 4-kinase [Actinidia chinensis var. chinensis]	108-128	2.2	GO:0004430(1-phosphatidylinositol 4-kinase activity);GO:0004674(protein serine/threonine kinase activity);GO:0005524(ATP binding);GO:0005634(nucleus);GO:0005737(cytoplasm);GO:0005829(cytosol);GO:0009507(chloroplast);GO:0009651(response to salt stress);GO:0016020(membrane);GO:0016301(kinase activity);GO:0016310(phosphorylation);GO:0046777(protein autophosphorylation);GO:0046854(phosphatidylinosito…
ath-miR159a	CSS0050524.1	CSS0050524	CSS0050524	Phosphatidylinositol 4-kinase [Actinidia chinensis var. chinensis]	151-171	2.2	GO:0004430(1-phosphatidylinositol 4-kinase activity);GO:0004674(protein serine/threonine kinase activity);GO:0005524(ATP binding);GO:0005634(nucleus);GO:0005737(cytoplasm);GO:0005829(cytosol);GO:0009507(chloroplast);GO:0009651(response to salt stress);GO:0016020(membrane);GO:0016301(kinase activity);GO:0016310(phosphorylation);GO:0046777(protein autophosphorylation);GO:0046854(phosphatidylinosito…
ath-miR159a	CSS0029877.1	CSS0029877	CSS0029877	transcription factor GAMYB-like [Cynara cardunculus var. scolymus]	1058-1078	2.2	GO:0000981(RNA polymerase II transcription factor activity, sequence-specific DNA binding);GO:0001135(transcription factor activity, RNA polymerase II transcription factor recruiting);GO:0003677(DNA binding);GO:0003700(DNA binding transcription factor activity);GO:0005634(nucleus);GO:0006351(transcription, DNA-templated);GO:0006355(regulation of transcription, DNA-templated);GO:0006357(regulation…
ath-miR159a	CSS0011063.1	CSS0011063	CSS0011063	transcription factor DUO1-like [Olea europaea var. sylvestris]	91-111	1.8	GO:0000981(RNA polymerase II transcription factor activity, sequence-specific DNA binding);GO:0001135(transcription factor activity, RNA polymerase II transcription factor recruiting);GO:0003677(DNA binding);GO:0003700(DNA binding transcription factor activity);GO:0005634(nucleus);GO:0006355(regulation of transcription, DNA-templated);GO:0006357(regulation of transcription by RNA polymerase II);G…
ath-miR159a	CSS0013250.1	CSS0013250	CSS0013250	Methyltransferase [Actinidia chinensis var. chinensis]	79-99	2	GO:0005768(endosome);GO:0005774(vacuolar membrane);GO:0005802(trans-Golgi network);GO:0008757(S-adenosylmethionine-dependent methyltransferase activity);GO:0032259(methylation)
ath-miR165a-3p_2ss17CT20CT	CSS0004529.1	CSS0004529	CSS0004529	Homeobox-leucine zipper protein like [Actinidia chinensis var. chinensis]	789-809	1.8	GO:0003677(DNA binding);GO:0003700(DNA binding transcription factor activity);GO:0005634(nucleus);GO:0006351(transcription, DNA-templated);GO:0006355(regulation of transcription, DNA-templated);GO:0008284(positive regulation of cell proliferation);GO:0008289(lipid binding);GO:0009733(response to auxin);GO:0010014(meristem initiation);GO:0010067(procambium histogenesis);GO:0010072(primary shoot ap…
ath-miR165a-3p_2ss17CT20CT	CSS0001516.1	CSS0001516	CSS0001516	PREDICTED: uncharacterized protein LOC18599125 [Theobroma cacao]	1040-1059	2.2	GO:0003674(molecular_function);GO:0005634(nucleus);GO:0006351(transcription, DNA-templated);GO:0032502(developmental process)
ath-miR165a-3p_2ss17CT20CT	CSS0044933.1	CSS0044933	CSS0044933	EGF domain-specific O-linked N-acetylglucosamine transferase [Actinidia chinensis var. chinensis]	1418-1438	2.5	GO:0005576(extracellular region)	ko00514(Other types of O-glycan biosynthesis)
ath-miR165a-3p_2ss17CT20CT	CSS0012269.1	CSS0012269	CSS0012269	Homeobox-leucine zipper protein like [Actinidia chinensis var. chinensis]	710-730	1.8	GO:0003677(DNA binding);GO:0003700(DNA binding transcription factor activity);GO:0005634(nucleus);GO:0006351(transcription, DNA-templated);GO:0006355(regulation of transcription, DNA-templated);GO:0008289(lipid binding);GO:0009855(determination of bilateral symmetry);GO:0009944(polarity specification of adaxial/abaxial axis);GO:0009956(radial pattern formation);GO:0010014(meristem initiation);GO:…
ath-miR165a-3p_2ss17CT20CT	CSS0004480.1	CSS0004480	CSS0004480	Cysteine desulfurase [Actinidia chinensis var. chinensis]	1628-1648	2.5	GO:0003674(molecular_function);GO:0005575(cellular_component);GO:0008150(biological_process)
ath-miR165a-3p_2ss17CT20CT	CSS0024393.1	CSS0024393	CSS0024393	Homeobox-leucine zipper protein like [Actinidia chinensis var. chinensis]	574-594	1.8	GO:0003677(DNA binding);GO:0003700(DNA binding transcription factor activity);GO:0005634(nucleus);GO:0006351(transcription, DNA-templated);GO:0006355(regulation of transcription, DNA-templated);GO:0008284(positive regulation of cell proliferation);GO:0008289(lipid binding);GO:0009733(response to auxin);GO:0010014(meristem initiation);GO:0010067(procambium histogenesis);GO:0010072(primary shoot ap…
ath-miR165a-3p_2ss17CT20CT	CSS0044392.1	CSS0044392	CSS0044392	Homeobox-leucine zipper protein like [Actinidia chinensis var. chinensis]	1347-1367	1.8	GO:0003677(DNA binding);GO:0003700(DNA binding transcription factor activity);GO:0005634(nucleus);GO:0006351(transcription, DNA-templated);GO:0006355(regulation of transcription, DNA-templated);GO:0008289(lipid binding);GO:0009855(determination of bilateral symmetry);GO:0009944(polarity specification of adaxial/abaxial axis);GO:0009956(radial pattern formation);GO:0010014(meristem initiation);GO:…
ath-miR165a-3p_2ss17CT20CT	CSS0018397.1	CSS0018397	CSS0018397	Homeobox-leucine zipper protein like [Actinidia chinensis var. chinensis]	1536-1556	1.2	GO:0003677(DNA binding);GO:0003700(DNA binding transcription factor activity);GO:0005634(nucleus);GO:0006351(transcription, DNA-templated);GO:0006355(regulation of transcription, DNA-templated);GO:0008289(lipid binding);GO:0009855(determination of bilateral symmetry);GO:0009965(leaf morphogenesis);GO:0010014(meristem initiation);GO:0010073(meristem maintenance);GO:0010075(regulation of meristem g…
ath-miR167a-5p_L-1R+1_1ss21AG	CSS0013201.1	CSS0013201	CSS0013201	auxin response factor 6 [Camellia sinensis]	2384-2404	2	GO:0003677(DNA binding);GO:0003700(DNA binding transcription factor activity);GO:0005515(protein binding);GO:0005634(nucleus);GO:0006351(transcription, DNA-templated);GO:0006355(regulation of transcription, DNA-templated);GO:0009733(response to auxin);GO:0009734(auxin-activated signaling pathway);GO:0009908(flower development)	ko04075(Plant hormone signal transduction)
ath-miR167a-5p_L-1R+1_1ss21AG	CSS0024948.1	CSS0024948	CSS0024948	auxin response factor 6 [Camellia sinensis]	3627-3647	2	GO:0003677(DNA binding);GO:0003700(DNA binding transcription factor activity);GO:0005515(protein binding);GO:0005634(nucleus);GO:0006351(transcription, DNA-templated);GO:0006355(regulation of transcription, DNA-templated);GO:0009733(response to auxin);GO:0009734(auxin-activated signaling pathway);GO:0009908(flower development)	ko04075(Plant hormone signal transduction)
ath-miR167a-5p_L-1R+1_1ss21AG	CSS0004545.1	CSS0004545	CSS0004545	auxin response factor 6 [Camellia sinensis]	2273-2293	2	GO:0003677(DNA binding);GO:0003700(DNA binding transcription factor activity);GO:0005515(protein binding);GO:0005634(nucleus);GO:0006351(transcription, DNA-templated);GO:0006355(regulation of transcription, DNA-templated);GO:0009733(response to auxin);GO:0009734(auxin-activated signaling pathway);GO:0009908(flower development)	ko04075(Plant hormone signal transduction)
ath-miR167c-3p_L-1_3ss4GA11T-14TC	CSS0035964.1	CSS0035964	CSS0035964	(+)-neomenthol dehydrogenase [Actinidia chinensis var. chinensis]	3-24	2.5	GO:0005737(cytoplasm);GO:0009505(plant-type cell wall);GO:0016491(oxidoreductase activity)	ko00902(Monoterpenoid biosynthesis)
ath-miR167d_1ss22GA	CSS0019724.1	CSS0019724	CSS0019724	LRR receptor-like serine/threonine-protein kinase precursor [Actinidia chinensis var. chinensis]	1706-1727	2.2	GO:0004674(protein serine/threonine kinase activity);GO:0005524(ATP binding);GO:0005576(extracellular region);GO:0006468(protein phosphorylation);GO:0007169(transmembrane receptor protein tyrosine kinase signaling pathway);GO:0016021(integral component of membrane);GO:0016301(kinase activity);GO:0016310(phosphorylation)
ath-miR167d_1ss22GA	CSS0017564.1	CSS0017564	CSS0017564	PREDICTED: probable LRR receptor-like serine/threonine-protein kinase At4g26540 [Nicotiana sylvestris]	1953-1974	2.2	GO:0004674(protein serine/threonine kinase activity);GO:0005524(ATP binding);GO:0005886(plasma membrane);GO:0006468(protein phosphorylation);GO:0007169(transmembrane receptor protein tyrosine kinase signaling pathway);GO:0010082(regulation of root meristem growth);GO:0016301(kinase activity)
ath-miR167d_L+1R-1	CSS0019724.1	CSS0019724	CSS0019724	LRR receptor-like serine/threonine-protein kinase precursor [Actinidia chinensis var. chinensis]	1707-1728	2.5	GO:0004674(protein serine/threonine kinase activity);GO:0005524(ATP binding);GO:0005576(extracellular region);GO:0006468(protein phosphorylation);GO:0007169(transmembrane receptor protein tyrosine kinase signaling pathway);GO:0016021(integral component of membrane);GO:0016301(kinase activity);GO:0016310(phosphorylation)
ath-miR167d_L+1R-1	CSS0017564.1	CSS0017564	CSS0017564	PREDICTED: probable LRR receptor-like serine/threonine-protein kinase At4g26540 [Nicotiana sylvestris]	1954-1975	2.5	GO:0004674(protein serine/threonine kinase activity);GO:0005524(ATP binding);GO:0005886(plasma membrane);GO:0006468(protein phosphorylation);GO:0007169(transmembrane receptor protein tyrosine kinase signaling pathway);GO:0010082(regulation of root meristem growth);GO:0016301(kinase activity)
ath-miR167d_L+1R-1	CSS0027736.1	CSS0027736	CSS0027736	sugar transport protein 5 [Camellia sinensis]	202-222	2.5	GO:0005351(carbohydrate:proton symporter activity);GO:0005355(glucose transmembrane transporter activity);GO:0005887(integral component of plasma membrane);GO:0046323(glucose import)
ath-miR167d_L+1R-1	CSS0028563.1	CSS0028563	CSS0028563	cytochrome P450 CYP736A54 [Bupleurum chinense]	923-943	2	GO:0016020(membrane);GO:0016709(oxidoreductase activity, acting on paired donors, with incorporation or reduction of molecular oxygen, NAD(P)H as one donor, and incorporation of one atom of oxygen);GO:0044550(secondary metabolite biosynthetic process)
ath-miR167d_L+1R-1	CSS0039494.1	CSS0039494	CSS0039494	K(+) efflux antiporter 6 like [Actinidia chinensis var. chinensis]	512-533	2.5	GO:0006813(potassium ion transport);GO:0015079(potassium ion transmembrane transporter activity);GO:0015299(solute:proton antiporter activity);GO:0015386(potassium:proton antiporter activity);GO:0016020(membrane);GO:0016021(integral component of membrane);GO:0022890(inorganic cation transmembrane transporter activity)	ko03030(DNA replication);ko03420(Nucleotide excision repair);ko03430(Mismatch repair);ko03440(Homologous recombination)
ath-miR167d_L+1R-1	CSS0021246.1	CSS0021246	CSS0021246	K(+) efflux antiporter 6 like [Actinidia chinensis var. chinensis]	512-533	2.5	GO:0006813(potassium ion transport);GO:0015079(potassium ion transmembrane transporter activity);GO:0015299(solute:proton antiporter activity);GO:0015386(potassium:proton antiporter activity);GO:0016020(membrane);GO:0016021(integral component of membrane);GO:0022890(inorganic cation transmembrane transporter activity)	ko03030(DNA replication);ko03420(Nucleotide excision repair);ko03430(Mismatch repair);ko03440(Homologous recombination)
ath-miR168a-5p	CSS0032972.1	CSS0032972	CSS0032972	PREDICTED: callose synthase 3 [Daucus carota subsp. sativus]	4636-4655	2.5	GO:0000148(1,3-beta-D-glucan synthase complex);GO:0003843(1,3-beta-D-glucan synthase activity);GO:0005886(plasma membrane)
ath-miR168a-5p	CSS0024840.1	CSS0024840	CSS0024840	Cysteine and histidine-rich domain-containing protein [Actinidia chinensis var. chinensis]	626-645	2	GO:0002679(respiratory burst involved in defense response);GO:0005515(protein binding);GO:0005634(nucleus);GO:0006952(defense response);GO:0008270(zinc ion binding);GO:0009626(plant-type hypersensitive response);GO:0009816(defense response to bacterium, incompatible interaction);GO:0009817(defense response to fungus, incompatible interaction);GO:0042742(defense response to bacterium);GO:0050821(p…	ko04626(Plant-pathogen interaction)
ath-miR168a-5p	CSS0018976.1	CSS0018976	CSS0018976	Protein argonaute 1B like [Actinidia chinensis var. chinensis]	422-442	2	GO:0005515(protein binding)
ath-miR168a-5p	CSS0027030.1	CSS0027030	CSS0027030	Protein argonaute 1B like [Actinidia chinensis var. chinensis]	688-708	2	GO:0005515(protein binding)
ath-miR168a-5p	CSS0028605.1	CSS0028605	CSS0028605	Cysteine and histidine-rich domain-containing protein [Actinidia chinensis var. chinensis]	506-525	2	GO:0002679(respiratory burst involved in defense response);GO:0005515(protein binding);GO:0005634(nucleus);GO:0006952(defense response);GO:0008270(zinc ion binding);GO:0009626(plant-type hypersensitive response);GO:0009816(defense response to bacterium, incompatible interaction);GO:0009817(defense response to fungus, incompatible interaction);GO:0042742(defense response to bacterium);GO:0050821(p…	ko04626(Plant-pathogen interaction)
ath-miR168a-5p	CSS0039173.1	CSS0039173	CSS0039173	callose synthase 3 [Coffea eugenioides]	4788-4808	2.2	GO:0000148(1,3-beta-D-glucan synthase complex);GO:0003843(1,3-beta-D-glucan synthase activity);GO:0005886(plasma membrane)
ath-miR172e-3p	CSS0007944.2	CSS0007944	CSS0007944	Protein EIN4 [Vitis vinifera]	272-293	2.5	GO:0000155(phosphorelay sensor kinase activity);GO:0004673(protein histidine kinase activity);GO:0004674(protein serine/threonine kinase activity);GO:0005524(ATP binding);GO:0005783(endoplasmic reticulum);GO:0005789(endoplasmic reticulum membrane);GO:0009873(ethylene-activated signaling pathway);GO:0010105(negative regulation of ethylene-activated signaling pathway);GO:0016021(integral component …	ko04016(MAPK signaling pathway - plant);ko04075(Plant hormone signal transduction)
ath-miR172e-3p	CSS0034861.1	CSS0034861	CSS0034861	transcription factor APETALA2 [Camellia sinensis]	575-595	0.5	-
ath-miR172e-3p	CSS0047898.1	CSS0047898	CSS0047898	endoglucanase 5-like [Coffea arabica]	1007-1027	2.5	GO:0004553(hydrolase activity, hydrolyzing O-glycosyl compounds);GO:0005576(extracellular region);GO:0008810(cellulase activity);GO:0030245(cellulose catabolic process);GO:0030246(carbohydrate binding);GO:0071555(cell wall organization)	ko00500(Starch and sucrose metabolism)
ath-miR172e-3p	CSS0013012.1	CSS0013012	CSS0013012	Ethylene-responsive transcription factor RAP2-7 like [Actinidia chinensis var. chinensis]	1357-1378	1.2	GO:0003677(DNA binding);GO:0003700(DNA binding transcription factor activity);GO:0005634(nucleus);GO:0006351(transcription, DNA-templated);GO:0006355(regulation of transcription, DNA-templated);GO:0009908(flower development);GO:0010073(meristem maintenance);GO:0010093(specification of floral organ identity);GO:0019953(sexual reproduction);GO:0030154(cell differentiation);GO:0048316(seed developme…
ath-miR172e-3p	CSS0037440.1	CSS0037440	CSS0037440	Ethylene-responsive transcription factor RAP2-7 like [Actinidia chinensis var. chinensis]	1500-1519	1.5	GO:0003677(DNA binding);GO:0003700(DNA binding transcription factor activity);GO:0005634(nucleus);GO:0006351(transcription, DNA-templated);GO:0006355(regulation of transcription, DNA-templated);GO:0009908(flower development);GO:0010073(meristem maintenance);GO:0010093(specification of floral organ identity);GO:0019953(sexual reproduction);GO:0030154(cell differentiation);GO:0048316(seed developme…
ath-miR172e-3p	CSS0018330.1	CSS0018330	CSS0018330	transcription factor APETALA2 [Vitis vinifera]	2109-2129	1	GO:0003677(DNA binding);GO:0003700(DNA binding transcription factor activity);GO:0005634(nucleus);GO:0006351(transcription, DNA-templated);GO:0006355(regulation of transcription, DNA-templated);GO:0009908(flower development);GO:0010073(meristem maintenance);GO:0010093(specification of floral organ identity);GO:0019953(sexual reproduction);GO:0030154(cell differentiation);GO:0048316(seed developme…
ath-miR172e-3p	CSS0005165.1	CSS0005165	CSS0005165	transcription factor APETALA2 [Camellia sinensis]	1929-1949	1	GO:0003677(DNA binding);GO:0003700(DNA binding transcription factor activity);GO:0005634(nucleus);GO:0006351(transcription, DNA-templated);GO:0006355(regulation of transcription, DNA-templated);GO:0009908(flower development);GO:0010073(meristem maintenance);GO:0010093(specification of floral organ identity);GO:0019953(sexual reproduction);GO:0030154(cell differentiation);GO:0048316(seed developme…
ath-miR172e-3p	CSS0016150.1	CSS0016150	CSS0016150	NA	1-21	1	-
ath-miR172e-3p	CSS0034691.1	CSS0034691	CSS0034691	Glutamine--tRNA ligase [Actinidia chinensis var. chinensis]	2488-2508	2.5	GO:0003723(RNA binding);GO:0004819(glutamine-tRNA ligase activity);GO:0005739(mitochondrion);GO:0005829(cytosol);GO:0006425(glutaminyl-tRNA aminoacylation)	ko00970(Aminoacyl-tRNA biosynthesis)
ath-miR172e-3p	CSS0016974.1	CSS0016974	CSS0016974	Glutamine--tRNA ligase [Actinidia chinensis var. chinensis]	2386-2406	2.5	GO:0003723(RNA binding);GO:0004819(glutamine-tRNA ligase activity);GO:0005739(mitochondrion);GO:0005829(cytosol);GO:0006425(glutaminyl-tRNA aminoacylation)	ko00970(Aminoacyl-tRNA biosynthesis)
ath-miR172e-3p	CSS0026700.1	CSS0026700	CSS0026700	putative RING-H2 finger protein ATL12 [Citrus sinensis]	483-502	2.5	GO:0043161(proteasome-mediated ubiquitin-dependent protein catabolic process);GO:0061630(ubiquitin protein ligase activity)
ath-miR172e-3p	CSS0041542.1	CSS0041542	CSS0041542	PREDICTED: ATP-dependent zinc metalloprotease FTSH 2, chloroplastic [Vitis vinifera]	1-22	2.5	GO:0004176(ATP-dependent peptidase activity);GO:0005739(mitochondrion);GO:0006508(proteolysis);GO:0008237(metallopeptidase activity);GO:0009535(chloroplast thylakoid membrane);GO:0009941(chloroplast envelope);GO:0010027(thylakoid membrane organization);GO:0010205(photoinhibition);GO:0010206(photosystem II repair);GO:0010304(PSII associated light-harvesting complex II catabolic process)
ath-miR172e-3p	CSS0004069.1	CSS0004069	CSS0004069	E3 ubiquitin-protein ligase ATL42-like [Olea europaea var. sylvestris]	378-397	2.5	GO:0043161(proteasome-mediated ubiquitin-dependent protein catabolic process);GO:0061630(ubiquitin protein ligase activity)
ath-miR172e-3p	CSS0013706.1	CSS0013706	CSS0013706	UPF0481 protein [Actinidia chinensis var. chinensis]	410-429	2	GO:0003674(molecular_function);GO:0005886(plasma membrane);GO:0008150(biological_process);GO:0016021(integral component of membrane)
ath-miR172e-3p	CSS0041049.1	CSS0041049	CSS0041049	Ethylene-responsive transcription factor RAP2-7 like [Actinidia chinensis var. chinensis]	1409-1430	1.2	GO:0003677(DNA binding);GO:0003700(DNA binding transcription factor activity);GO:0005634(nucleus);GO:0006351(transcription, DNA-templated);GO:0006355(regulation of transcription, DNA-templated);GO:0009908(flower development);GO:0010073(meristem maintenance);GO:0010093(specification of floral organ identity);GO:0019953(sexual reproduction);GO:0030154(cell differentiation);GO:0048316(seed developme…
ath-miR172e-3p	CSS0004391.1	CSS0004391	CSS0004391	Floral homeotic protein like [Actinidia chinensis var. chinensis]	1295-1316	1.5	GO:0003677(DNA binding);GO:0003700(DNA binding transcription factor activity);GO:0005634(nucleus);GO:0006351(transcription, DNA-templated);GO:0006355(regulation of transcription, DNA-templated);GO:0009908(flower development);GO:0010073(meristem maintenance);GO:0010093(specification of floral organ identity);GO:0019953(sexual reproduction);GO:0030154(cell differentiation);GO:0048316(seed developme…
ath-miR390a-5p	CSS0047175.1	CSS0047175	CSS0047175	hypothetical protein CCACVL1_04141 [Corchorus capsularis]	1195-1215	2.5	GO:0003723(RNA binding);GO:0004525(ribonuclease III activity);GO:0005634(nucleus);GO:0005737(cytoplasm);GO:0016442(RISC complex);GO:0030422(production of siRNA involved in RNA interference)	ko00040(Pentose and glucuronate interconversions);ko00052(Galactose metabolism);ko00053(Ascorbate and aldarate metabolism);ko00520(Amino sugar and nucleotide sugar metabolism)
ath-miR390a-5p	CSS0020284.1	CSS0020284	CSS0020284	hypothetical protein CCACVL1_04141 [Corchorus capsularis]	1165-1185	2.5	GO:0003723(RNA binding);GO:0004525(ribonuclease III activity);GO:0005634(nucleus);GO:0005737(cytoplasm);GO:0016442(RISC complex);GO:0030422(production of siRNA involved in RNA interference)	ko00040(Pentose and glucuronate interconversions);ko00052(Galactose metabolism);ko00053(Ascorbate and aldarate metabolism);ko00520(Amino sugar and nucleotide sugar metabolism)
ath-miR390a-5p	CSS0020846.1	CSS0020846	CSS0020846	DExH-box ATP-dependent RNA helicase [Actinidia chinensis var. chinensis]	3844-3864	2.5	GO:0003723(RNA binding);GO:0004386(helicase activity);GO:0005515(protein binding);GO:0005524(ATP binding);GO:0005634(nucleus);GO:0005681(spliceosomal complex);GO:0005730(nucleolus);GO:0005829(cytosol);GO:0006397(mRNA processing);GO:0008026(ATP-dependent helicase activity);GO:0008380(RNA splicing);GO:0009793(embryo development ending in seed dormancy);GO:0010228(vegetative to reproductive phase tr…	ko03040(Spliceosome)
ath-miR390a-5p	CSS0003514.1	CSS0003514	CSS0003514	Leucine-rich repeat receptor-like protein kinase precursor [Actinidia chinensis var. chinensis]	1606-1626	2.5	GO:0004674(protein serine/threonine kinase activity);GO:0005515(protein binding);GO:0005524(ATP binding);GO:0005634(nucleus);GO:0005886(plasma membrane);GO:0006468(protein phosphorylation);GO:0009506(plasmodesma);GO:0009755(hormone-mediated signaling pathway);GO:0010183(pollen tube guidance);GO:0016020(membrane);GO:0016021(integral component of membrane);GO:0016301(kinase activity);GO:0090406(pol…
ath-miR390a-5p	CSS0028874.1	CSS0028874	CSS0028874	Leucine-rich repeat receptor-like protein kinase precursor [Actinidia chinensis var. chinensis]	1606-1626	2.5	GO:0004674(protein serine/threonine kinase activity);GO:0005515(protein binding);GO:0005524(ATP binding);GO:0005634(nucleus);GO:0005886(plasma membrane);GO:0006468(protein phosphorylation);GO:0009506(plasmodesma);GO:0009755(hormone-mediated signaling pathway);GO:0010183(pollen tube guidance);GO:0016020(membrane);GO:0016021(integral component of membrane);GO:0016301(kinase activity);GO:0090406(pol…
ath-miR390a-5p	CSS0037808.1	CSS0037808	CSS0037808	PREDICTED: receptor-like protein kinase isoform X1 [Juglans regia]	1740-1760	2.5	GO:0004674(protein serine/threonine kinase activity);GO:0005524(ATP binding);GO:0005886(plasma membrane);GO:0006468(protein phosphorylation);GO:0007169(transmembrane receptor protein tyrosine kinase signaling pathway);GO:0009611(response to wounding);GO:0009753(response to jasmonic acid);GO:0016021(integral component of membrane);GO:0016301(kinase activity);GO:0042277(peptide binding);GO:0042742(…
ath-miR390a-5p	CSS0010764.1	CSS0010764	CSS0010764	NA	30-50	2.5	-
ath-miR390a-5p	CSS0021384.1	CSS0021384	CSS0021384	NA	30-50	2.5	-
ath-miR390a-5p	CSS0035135.1	CSS0035135	CSS0035135	gag-pol polyprotein [Populus deltoides]	451-471	2	GO:0003723(RNA binding);GO:0004525(ribonuclease III activity);GO:0005634(nucleus);GO:0005737(cytoplasm);GO:0016442(RISC complex);GO:0030422(production of siRNA involved in RNA interference)	ko04144(Endocytosis)
ath-miR390a-5p	CSS0035235.1	CSS0035235	CSS0035235	NA	257-277	1.8	-
ath-miR390a-5p	CSS0019063.1	CSS0019063	CSS0019063	Protein NSP-INTERACTING KINASE 1 like [Actinidia chinensis var. chinensis]	335-354	2	GO:0004675(transmembrane receptor protein serine/threonine kinase activity);GO:0005515(protein binding);GO:0005524(ATP binding);GO:0005576(extracellular region);GO:0005886(plasma membrane);GO:0006468(protein phosphorylation);GO:0007166(cell surface receptor signaling pathway);GO:0016021(integral component of membrane);GO:0016032(viral process);GO:0016301(kinase activity);GO:0051607(defense respon…
ath-miR390a-5p	CSS0048789.1	CSS0048789	CSS0048789	Protein NSP-INTERACTING KINASE 1 like [Actinidia chinensis var. chinensis]	577-596	2.5	GO:0004675(transmembrane receptor protein serine/threonine kinase activity);GO:0005515(protein binding);GO:0005524(ATP binding);GO:0005576(extracellular region);GO:0005886(plasma membrane);GO:0006468(protein phosphorylation);GO:0007166(cell surface receptor signaling pathway);GO:0016021(integral component of membrane);GO:0016032(viral process);GO:0016301(kinase activity);GO:0051607(defense respon…
ath-miR390a-5p	CSS0024495.1	CSS0024495	CSS0024495	Leucine-rich repeat receptor-like protein kinase precursor [Actinidia chinensis var. chinensis]	853-873	2.5	GO:0004674(protein serine/threonine kinase activity);GO:0005515(protein binding);GO:0005524(ATP binding);GO:0005634(nucleus);GO:0005886(plasma membrane);GO:0006468(protein phosphorylation);GO:0009506(plasmodesma);GO:0009755(hormone-mediated signaling pathway);GO:0010183(pollen tube guidance);GO:0016020(membrane);GO:0016021(integral component of membrane);GO:0016301(kinase activity);GO:0090406(pol…
ath-miR390a-5p	CSS0018758.1	CSS0018758	CSS0018758	Receptor protein kinase-like protein [Actinidia chinensis var. chinensis]	601-620	2.5	GO:0004674(protein serine/threonine kinase activity);GO:0005515(protein binding);GO:0005524(ATP binding);GO:0005886(plasma membrane);GO:0006468(protein phosphorylation);GO:0007169(transmembrane receptor protein tyrosine kinase signaling pathway);GO:0009505(plant-type cell wall);GO:0009507(chloroplast);GO:0009570(chloroplast stroma);GO:0010069(zygote asymmetric cytokinesis in embryo sac);GO:001007…
ath-miR390a-5p	CSS0021848.1	CSS0021848	CSS0021848	Sulfhydryl oxidase [Actinidia chinensis var. chinensis]	170-190	2	GO:0003756(protein disulfide isomerase activity);GO:0005615(extracellular space);GO:0006457(protein folding);GO:0016971(flavin-linked sulfhydryl oxidase activity);GO:0030173(integral component of Golgi membrane)
ath-miR390a-5p	CSS0038841.1	CSS0038841	CSS0038841	Receptor protein kinase-like protein [Actinidia chinensis var. chinensis]	377-396	2.5	GO:0004674(protein serine/threonine kinase activity);GO:0005515(protein binding);GO:0005524(ATP binding);GO:0005886(plasma membrane);GO:0006468(protein phosphorylation);GO:0007169(transmembrane receptor protein tyrosine kinase signaling pathway);GO:0009505(plant-type cell wall);GO:0009507(chloroplast);GO:0009570(chloroplast stroma);GO:0010069(zygote asymmetric cytokinesis in embryo sac);GO:001007…
ath-miR390a-5p	CSS0039442.1	CSS0039442	CSS0039442	LOW QUALITY PROTEIN: leucine-rich repeat receptor-like tyrosine-protein kinase PXC3 [Ricinus communis]	1204-1224	1.5	GO:0004674(protein serine/threonine kinase activity);GO:0004714(transmembrane receptor protein tyrosine kinase activity);GO:0005524(ATP binding);GO:0005886(plasma membrane);GO:0006468(protein phosphorylation);GO:0007169(transmembrane receptor protein tyrosine kinase signaling pathway);GO:0016021(integral component of membrane);GO:0016301(kinase activity)
ath-miR390a-5p	CSS0012993.1	CSS0012993	CSS0012993	hypothetical protein CCACVL1_14766 [Corchorus capsularis]	195-216	2	GO:0005929(cilium);GO:0035091(phosphatidylinositol binding);GO:0061512(protein localization to cilium)
ath-miR393a-5p_L+1R-1	CSS0004040.2	CSS0004040	CSS0004040	Protein AUXIN SIGNALING F-BOX like [Actinidia chinensis var. chinensis]	2262-2284	1.5	GO:0000822(inositol hexakisphosphate binding);GO:0009734(auxin-activated signaling pathway)	ko04075(Plant hormone signal transduction)
ath-miR393a-5p_L+1R-1	CSS0025107.1	CSS0025107	CSS0025107	transport inhibitor response 1 [Camellia sinensis]	1638-1658	1	GO:0000822(inositol hexakisphosphate binding);GO:0009734(auxin-activated signaling pathway)	ko04075(Plant hormone signal transduction)
ath-miR393a-5p_L+1R-1	CSS0047444.1	CSS0047444	CSS0047444	transport inhibitor response 1 [Camellia sinensis]	1499-1519	1	GO:0000822(inositol hexakisphosphate binding);GO:0009734(auxin-activated signaling pathway)	ko04075(Plant hormone signal transduction)
ath-miR393a-5p_L+1R-1	CSS0039207.1	CSS0039207	CSS0039207	PREDICTED: protein AUXIN SIGNALING F-BOX 2-like [Nicotiana tomentosiformis]	268-290	2	GO:0000822(inositol hexakisphosphate binding);GO:0009734(auxin-activated signaling pathway)	ko04075(Plant hormone signal transduction)
ath-miR396a-5p_2ss7AG21GT	CSS0025276.1	CSS0025276	CSS0025276	L10-interacting MYB domain-containing protein [Actinidia chinensis var. chinensis]	594-614	2	GO:0005634(nucleus)
ath-miR396a-5p_2ss7AG21GT	CSS0049575.2	CSS0049575	CSS0049575	Methyltransferase-like protein [Actinidia chinensis var. chinensis]	405-424	2.5	GO:0003676(nucleic acid binding);GO:0005515(protein binding);GO:0005634(nucleus);GO:0005737(cytoplasm);GO:0005829(cytosol);GO:0008168(methyltransferase activity);GO:0008757(S-adenosylmethionine-dependent methyltransferase activity);GO:0009793(embryo development ending in seed dormancy);GO:0032259(methylation);GO:0080009(mRNA methylation)
ath-miR396a-5p_2ss7AG21GT	CSS0001981.1	CSS0001981	CSS0001981	DNA (cytosine-5)-methyltransferase [Actinidia chinensis var. chinensis]	175-195	2.5	GO:0003677(DNA binding);GO:0003682(chromatin binding);GO:0003886(DNA (cytosine-5-)-methyltransferase activity);GO:0005515(protein binding);GO:0005634(nucleus);GO:0006349(regulation of gene expression by genetic imprinting);GO:0008168(methyltransferase activity);GO:0009294(DNA mediated transformation);GO:0009910(negative regulation of flower development);GO:0010069(zygote asymmetric cytokinesis in…	ko00270(Cysteine and methionine metabolism)
ath-miR396a-5p_2ss7AG21GT	CSS0014336.1	CSS0014336	CSS0014336	NA	232-252	2.5	-
ath-miR396a-5p_2ss7AG21GT	CSS0002059.1	CSS0002059	CSS0002059	ATP-dependent zinc metalloprotease FTSH 4 like [Actinidia chinensis var. chinensis]	2347-2367	2.5	GO:0004176(ATP-dependent peptidase activity);GO:0005739(mitochondrion);GO:0006508(proteolysis);GO:0008237(metallopeptidase activity)
ath-miR396a-5p_2ss7AG21GT	CSS0020233.1	CSS0020233	CSS0020233	DNA (cytosine-5)-methyltransferase [Actinidia chinensis var. chinensis]	148-168	2.5	GO:0010216(maintenance of DNA methylation);GO:0010424(DNA methylation on cytosine within a CG sequence)	ko00270(Cysteine and methionine metabolism)
ath-miR396a-5p_2ss7AG21GT	CSS0042457.1	CSS0042457	CSS0042457	DNA (cytosine-5)-methyltransferase [Actinidia chinensis var. chinensis]	4669-4689	2.5	GO:0010216(maintenance of DNA methylation);GO:0010424(DNA methylation on cytosine within a CG sequence);GO:0016458(gene silencing)	ko00270(Cysteine and methionine metabolism)
ath-miR396a-5p_2ss7AG21GT	CSS0004149.1	CSS0004149	CSS0004149	Protein LURP-one-related like [Actinidia chinensis var. chinensis]	520-540	2.5	GO:0006952(defense response)
ath-miR396a-5p_2ss7AG21GT	CSS0042245.1	CSS0042245	CSS0042245	Protein LURP-one-related like [Actinidia chinensis var. chinensis]	559-579	2.5	GO:0006952(defense response)
ath-miR396a-5p_2ss7AG21GT	CSS0033548.1	CSS0033548	CSS0033548	NA	1663-1683	2.5	-
ath-miR396a-5p_2ss7AG21GT	CSS0026021.1	CSS0026021	CSS0026021	Phospholipid-transporting ATPase [Actinidia chinensis var. chinensis]	352-372	2	GO:0004012(phospholipid-translocating ATPase activity);GO:0005802(trans-Golgi network);GO:0005886(plasma membrane);GO:0048194(Golgi vesicle budding)
ath-miR396a-5p_2ss7AG21GT	CSS0010492.1	CSS0010492	CSS0010492	hypothetical protein MANES_12G011600 [Manihot esculenta]	5-24	2.5	GO:0000785(chromatin);GO:0000794(condensed nuclear chromosome);GO:0003677(DNA binding);GO:0005634(nucleus);GO:0005654(nucleoplasm);GO:0005694(chromosome);GO:0007129(synapsis);GO:0051026(chiasma assembly)
ath-miR396a-5p_2ss7AG21GT	CSS0046454.1	CSS0046454	CSS0046454	Myosin-3 like [Actinidia chinensis var. chinensis]	1573-1593	2.5	GO:0003677(DNA binding);GO:0005634(nucleus);GO:0008150(biological_process);GO:0046983(protein dimerization activity)	ko02010(ABC transporters)
ath-miR396a-5p_2ss7AG21GT	CSS0041373.1	CSS0041373	CSS0041373	unnamed protein product, partial [Vitis vinifera]	686-705	2.5	GO:0005737(cytoplasm);GO:0016020(membrane)	ko00040(Pentose and glucuronate interconversions);ko00051(Fructose and mannose metabolism)
ath-miR396a-5p_2ss7AG21GT	CSS0022981.1	CSS0022981	CSS0022981	Phospholipid-transporting ATPase [Actinidia chinensis var. chinensis]	352-372	2.5	GO:0004012(phospholipid-translocating ATPase activity);GO:0005802(trans-Golgi network);GO:0005886(plasma membrane);GO:0048194(Golgi vesicle budding)
ath-miR396a-5p_2ss7AG21GT	CSS0011905.1	CSS0011905	CSS0011905	Heavy metal-associated isoprenylated plant protein [Actinidia chinensis var. chinensis]	224-244	2.5	GO:0005737(cytoplasm);GO:0030001(metal ion transport);GO:0046914(transition metal ion binding);GO:0046916(cellular transition metal ion homeostasis)
ath-miR396a-5p_2ss7AG21GT	CSS0023092.1	CSS0023092	CSS0023092	Calcium-transporting ATPase 13 plasma membrane-type [Actinidia chinensis var. chinensis]	1970-1989	2	GO:0005388(calcium-transporting ATPase activity);GO:0005887(integral component of plasma membrane);GO:0043231(intracellular membrane-bounded organelle)
ath-miR396a-5p_2ss7AG21GT	CSS0042734.1	CSS0042734	CSS0042734	Calcium-transporting ATPase 13 plasma membrane-type [Actinidia chinensis var. chinensis]	1967-1986	2.5	GO:0005388(calcium-transporting ATPase activity);GO:0005887(integral component of plasma membrane);GO:0043231(intracellular membrane-bounded organelle)
ath-miR396a-5p_2ss7AG21GT	CSS0001857.1	CSS0001857	CSS0001857	Myosin-3 like [Actinidia chinensis var. chinensis]	1456-1476	2.5	GO:0003677(DNA binding);GO:0005634(nucleus);GO:0008150(biological_process);GO:0046983(protein dimerization activity)	ko02010(ABC transporters)
ath-miR396a-5p_2ss7AG21GT	CSS0040648.1	CSS0040648	CSS0040648	Oryzain alpha chain like [Actinidia chinensis var. chinensis]	498-518	2.2	GO:0004197(cysteine-type endopeptidase activity);GO:0005615(extracellular space);GO:0005764(lysosome);GO:0051603(proteolysis involved in cellular protein catabolic process)
ath-miR396a-5p_2ss7AG21GT	CSS0016257.1	CSS0016257	CSS0016257	DNA (cytosine-5)-methyltransferase [Actinidia chinensis var. chinensis]	4669-4689	2.5	GO:0010216(maintenance of DNA methylation);GO:0010424(DNA methylation on cytosine within a CG sequence);GO:0016458(gene silencing)	ko00270(Cysteine and methionine metabolism)
ath-miR396a-5p_2ss7AG21GT	CSS0000244.1	CSS0000244	CSS0000244	PREDICTED: putative nuclease HARBI1 [Gossypium raimondii]	534-554	2.2	GO:0005634(nucleus)
ath-miR396a-5p_2ss7AG21GT	CSS0008698.1	CSS0008698	CSS0008698	hypothetical protein JCGZ_17958 [Jatropha curcas]	5-24	2.5	-
ath-miR396a-5p_2ss7AG21GT	CSS0002592.1	CSS0002592	CSS0002592	Myosin-3 like [Actinidia chinensis var. chinensis]	1573-1593	2.5	GO:0003677(DNA binding);GO:0005634(nucleus);GO:0008150(biological_process);GO:0046983(protein dimerization activity)	ko02010(ABC transporters)
ath-miR396a-5p_2ss7AG21GT	CSS0003868.1	CSS0003868	CSS0003868	DNA (cytosine-5)-methyltransferase [Actinidia chinensis var. chinensis]	175-195	2.5	GO:0003677(DNA binding);GO:0003682(chromatin binding);GO:0003886(DNA (cytosine-5-)-methyltransferase activity);GO:0005515(protein binding);GO:0005634(nucleus);GO:0006349(regulation of gene expression by genetic imprinting);GO:0008168(methyltransferase activity);GO:0009294(DNA mediated transformation);GO:0009910(negative regulation of flower development);GO:0010069(zygote asymmetric cytokinesis in…	ko00270(Cysteine and methionine metabolism)
ath-miR396a-5p_2ss7AG21GT	CSS0040437.1	CSS0040437	CSS0040437	DNA (cytosine-5)-methyltransferase [Actinidia chinensis var. chinensis]	175-195	2.5	GO:0010216(maintenance of DNA methylation);GO:0010424(DNA methylation on cytosine within a CG sequence)	ko00270(Cysteine and methionine metabolism)
ath-miR396a-5p_2ss7AG21GT	CSS0036208.1	CSS0036208	CSS0036208	hypothetical protein COLO4_12145 [Corchorus olitorius]	460-480	2.5	GO:0003677(DNA binding);GO:0003682(chromatin binding);GO:0003886(DNA (cytosine-5-)-methyltransferase activity);GO:0005515(protein binding);GO:0005634(nucleus);GO:0006349(regulation of gene expression by genetic imprinting);GO:0008168(methyltransferase activity);GO:0009294(DNA mediated transformation);GO:0009910(negative regulation of flower development);GO:0010069(zygote asymmetric cytokinesis in…	ko00270(Cysteine and methionine metabolism)
ath-miR396a-5p_2ss7AG21GT	CSS0041848.1	CSS0041848	CSS0041848	DNA (cytosine-5)-methyltransferase [Actinidia chinensis var. chinensis]	1498-1518	2.5	GO:0010216(maintenance of DNA methylation);GO:0010424(DNA methylation on cytosine within a CG sequence)	ko00270(Cysteine and methionine metabolism)
ath-miR396a-5p_2ss7AG21GT	CSS0032915.1	CSS0032915	CSS0032915	Myosin-3 like [Actinidia chinensis var. chinensis]	1414-1434	2.5	GO:0003677(DNA binding);GO:0005634(nucleus);GO:0008150(biological_process);GO:0046983(protein dimerization activity)	ko02010(ABC transporters)
ath-miR396b-5p_1ss7AG	CSS0025276.1	CSS0025276	CSS0025276	L10-interacting MYB domain-containing protein [Actinidia chinensis var. chinensis]	594-614	2	GO:0005634(nucleus)
ath-miR396b-5p_1ss7AG	CSS0049575.2	CSS0049575	CSS0049575	Methyltransferase-like protein [Actinidia chinensis var. chinensis]	405-424	2.5	GO:0003676(nucleic acid binding);GO:0005515(protein binding);GO:0005634(nucleus);GO:0005737(cytoplasm);GO:0005829(cytosol);GO:0008168(methyltransferase activity);GO:0008757(S-adenosylmethionine-dependent methyltransferase activity);GO:0009793(embryo development ending in seed dormancy);GO:0032259(methylation);GO:0080009(mRNA methylation)
ath-miR396b-5p_1ss7AG	CSS0001981.1	CSS0001981	CSS0001981	DNA (cytosine-5)-methyltransferase [Actinidia chinensis var. chinensis]	175-195	2.5	GO:0003677(DNA binding);GO:0003682(chromatin binding);GO:0003886(DNA (cytosine-5-)-methyltransferase activity);GO:0005515(protein binding);GO:0005634(nucleus);GO:0006349(regulation of gene expression by genetic imprinting);GO:0008168(methyltransferase activity);GO:0009294(DNA mediated transformation);GO:0009910(negative regulation of flower development);GO:0010069(zygote asymmetric cytokinesis in…	ko00270(Cysteine and methionine metabolism)
ath-miR396b-5p_1ss7AG	CSS0014336.1	CSS0014336	CSS0014336	NA	232-252	2.5	-
ath-miR396b-5p_1ss7AG	CSS0002059.1	CSS0002059	CSS0002059	ATP-dependent zinc metalloprotease FTSH 4 like [Actinidia chinensis var. chinensis]	2347-2367	2.5	GO:0004176(ATP-dependent peptidase activity);GO:0005739(mitochondrion);GO:0006508(proteolysis);GO:0008237(metallopeptidase activity)
ath-miR396b-5p_1ss7AG	CSS0020233.1	CSS0020233	CSS0020233	DNA (cytosine-5)-methyltransferase [Actinidia chinensis var. chinensis]	148-168	2.5	GO:0010216(maintenance of DNA methylation);GO:0010424(DNA methylation on cytosine within a CG sequence)	ko00270(Cysteine and methionine metabolism)
ath-miR396b-5p_1ss7AG	CSS0042457.1	CSS0042457	CSS0042457	DNA (cytosine-5)-methyltransferase [Actinidia chinensis var. chinensis]	4669-4689	2.5	GO:0010216(maintenance of DNA methylation);GO:0010424(DNA methylation on cytosine within a CG sequence);GO:0016458(gene silencing)	ko00270(Cysteine and methionine metabolism)
ath-miR396b-5p_1ss7AG	CSS0004149.1	CSS0004149	CSS0004149	Protein LURP-one-related like [Actinidia chinensis var. chinensis]	520-540	2.5	GO:0006952(defense response)
ath-miR396b-5p_1ss7AG	CSS0042245.1	CSS0042245	CSS0042245	Protein LURP-one-related like [Actinidia chinensis var. chinensis]	559-579	2.5	GO:0006952(defense response)
ath-miR396b-5p_1ss7AG	CSS0033548.1	CSS0033548	CSS0033548	NA	1663-1683	2.5	-
ath-miR396b-5p_1ss7AG	CSS0026021.1	CSS0026021	CSS0026021	Phospholipid-transporting ATPase [Actinidia chinensis var. chinensis]	352-372	2	GO:0004012(phospholipid-translocating ATPase activity);GO:0005802(trans-Golgi network);GO:0005886(plasma membrane);GO:0048194(Golgi vesicle budding)
ath-miR396b-5p_1ss7AG	CSS0046454.1	CSS0046454	CSS0046454	Myosin-3 like [Actinidia chinensis var. chinensis]	1573-1593	2.5	GO:0003677(DNA binding);GO:0005634(nucleus);GO:0008150(biological_process);GO:0046983(protein dimerization activity)	ko02010(ABC transporters)
ath-miR396b-5p_1ss7AG	CSS0010492.1	CSS0010492	CSS0010492	hypothetical protein MANES_12G011600 [Manihot esculenta]	5-24	2.5	GO:0000785(chromatin);GO:0000794(condensed nuclear chromosome);GO:0003677(DNA binding);GO:0005634(nucleus);GO:0005654(nucleoplasm);GO:0005694(chromosome);GO:0007129(synapsis);GO:0051026(chiasma assembly)
ath-miR396b-5p_1ss7AG	CSS0041373.1	CSS0041373	CSS0041373	unnamed protein product, partial [Vitis vinifera]	686-705	2.5	GO:0005737(cytoplasm);GO:0016020(membrane)	ko00040(Pentose and glucuronate interconversions);ko00051(Fructose and mannose metabolism)
ath-miR396b-5p_1ss7AG	CSS0022981.1	CSS0022981	CSS0022981	Phospholipid-transporting ATPase [Actinidia chinensis var. chinensis]	352-372	2.5	GO:0004012(phospholipid-translocating ATPase activity);GO:0005802(trans-Golgi network);GO:0005886(plasma membrane);GO:0048194(Golgi vesicle budding)
ath-miR396b-5p_1ss7AG	CSS0011905.1	CSS0011905	CSS0011905	Heavy metal-associated isoprenylated plant protein [Actinidia chinensis var. chinensis]	224-244	2.5	GO:0005737(cytoplasm);GO:0030001(metal ion transport);GO:0046914(transition metal ion binding);GO:0046916(cellular transition metal ion homeostasis)
ath-miR396b-5p_1ss7AG	CSS0023092.1	CSS0023092	CSS0023092	Calcium-transporting ATPase 13 plasma membrane-type [Actinidia chinensis var. chinensis]	1970-1989	2	GO:0005388(calcium-transporting ATPase activity);GO:0005887(integral component of plasma membrane);GO:0043231(intracellular membrane-bounded organelle)
ath-miR396b-5p_1ss7AG	CSS0042734.1	CSS0042734	CSS0042734	Calcium-transporting ATPase 13 plasma membrane-type [Actinidia chinensis var. chinensis]	1967-1986	2.5	GO:0005388(calcium-transporting ATPase activity);GO:0005887(integral component of plasma membrane);GO:0043231(intracellular membrane-bounded organelle)
ath-miR396b-5p_1ss7AG	CSS0001857.1	CSS0001857	CSS0001857	Myosin-3 like [Actinidia chinensis var. chinensis]	1456-1476	2.5	GO:0003677(DNA binding);GO:0005634(nucleus);GO:0008150(biological_process);GO:0046983(protein dimerization activity)	ko02010(ABC transporters)
ath-miR396b-5p_1ss7AG	CSS0040648.1	CSS0040648	CSS0040648	Oryzain alpha chain like [Actinidia chinensis var. chinensis]	498-518	2.2	GO:0004197(cysteine-type endopeptidase activity);GO:0005615(extracellular space);GO:0005764(lysosome);GO:0051603(proteolysis involved in cellular protein catabolic process)
ath-miR396b-5p_1ss7AG	CSS0016257.1	CSS0016257	CSS0016257	DNA (cytosine-5)-methyltransferase [Actinidia chinensis var. chinensis]	4669-4689	2.5	GO:0010216(maintenance of DNA methylation);GO:0010424(DNA methylation on cytosine within a CG sequence);GO:0016458(gene silencing)	ko00270(Cysteine and methionine metabolism)
ath-miR396b-5p_1ss7AG	CSS0000244.1	CSS0000244	CSS0000244	PREDICTED: putative nuclease HARBI1 [Gossypium raimondii]	534-554	2.2	GO:0005634(nucleus)
ath-miR396b-5p_1ss7AG	CSS0008698.1	CSS0008698	CSS0008698	hypothetical protein JCGZ_17958 [Jatropha curcas]	5-24	2.5	-
ath-miR396b-5p_1ss7AG	CSS0002592.1	CSS0002592	CSS0002592	Myosin-3 like [Actinidia chinensis var. chinensis]	1573-1593	2.5	GO:0003677(DNA binding);GO:0005634(nucleus);GO:0008150(biological_process);GO:0046983(protein dimerization activity)	ko02010(ABC transporters)
ath-miR396b-5p_1ss7AG	CSS0003868.1	CSS0003868	CSS0003868	DNA (cytosine-5)-methyltransferase [Actinidia chinensis var. chinensis]	175-195	2.5	GO:0003677(DNA binding);GO:0003682(chromatin binding);GO:0003886(DNA (cytosine-5-)-methyltransferase activity);GO:0005515(protein binding);GO:0005634(nucleus);GO:0006349(regulation of gene expression by genetic imprinting);GO:0008168(methyltransferase activity);GO:0009294(DNA mediated transformation);GO:0009910(negative regulation of flower development);GO:0010069(zygote asymmetric cytokinesis in…	ko00270(Cysteine and methionine metabolism)
ath-miR396b-5p_1ss7AG	CSS0040437.1	CSS0040437	CSS0040437	DNA (cytosine-5)-methyltransferase [Actinidia chinensis var. chinensis]	175-195	2.5	GO:0010216(maintenance of DNA methylation);GO:0010424(DNA methylation on cytosine within a CG sequence)	ko00270(Cysteine and methionine metabolism)
ath-miR396b-5p_1ss7AG	CSS0036208.1	CSS0036208	CSS0036208	hypothetical protein COLO4_12145 [Corchorus olitorius]	460-480	2.5	GO:0003677(DNA binding);GO:0003682(chromatin binding);GO:0003886(DNA (cytosine-5-)-methyltransferase activity);GO:0005515(protein binding);GO:0005634(nucleus);GO:0006349(regulation of gene expression by genetic imprinting);GO:0008168(methyltransferase activity);GO:0009294(DNA mediated transformation);GO:0009910(negative regulation of flower development);GO:0010069(zygote asymmetric cytokinesis in…	ko00270(Cysteine and methionine metabolism)
ath-miR396b-5p_1ss7AG	CSS0041848.1	CSS0041848	CSS0041848	DNA (cytosine-5)-methyltransferase [Actinidia chinensis var. chinensis]	1498-1518	2.5	GO:0010216(maintenance of DNA methylation);GO:0010424(DNA methylation on cytosine within a CG sequence)	ko00270(Cysteine and methionine metabolism)
ath-miR396b-5p_1ss7AG	CSS0032915.1	CSS0032915	CSS0032915	Myosin-3 like [Actinidia chinensis var. chinensis]	1414-1434	2.5	GO:0003677(DNA binding);GO:0005634(nucleus);GO:0008150(biological_process);GO:0046983(protein dimerization activity)	ko02010(ABC transporters)
ath-miR408-3p_L-3	CSS0030642.1	CSS0030642	CSS0030642	putative ribonuclease H protein [Vitis vinifera]	1075-1092	2.5	-
ath-miR408-3p_L-3	CSS0042116.1	CSS0042116	CSS0042116	NA	325-342	2.5	-
ath-miR408-3p_L-3	CSS0011342.1	CSS0011342	CSS0011342	PREDICTED: blue copper protein-like [Juglans regia]	669-686	2.5	GO:0046658(anchored component of plasma membrane)
ath-miR408-3p_L-3	CSS0024494.1	CSS0024494	CSS0024494	gag-pol, partial [Camellia sinensis]	221-238	2.5	GO:0003676(nucleic acid binding);GO:0015074(DNA integration)	ko00040(Pentose and glucuronate interconversions);ko00052(Galactose metabolism);ko00500(Starch and sucrose metabolism);ko00520(Amino sugar and nucleotide sugar metabolism)
ath-miR408-3p_L-3	CSS0048393.1	CSS0048393	CSS0048393	Ferritin-like superfamily protein [Actinidia chinensis var. chinensis]	7-24	2	GO:0003674(molecular_function);GO:0005634(nucleus);GO:0008150(biological_process)
ath-miR408-3p_L-3	CSS0015557.1	CSS0015557	CSS0015557	Basic blue protein [Actinidia chinensis var. chinensis]	64-81	2	GO:0046658(anchored component of plasma membrane)
ath-miR408-3p_L-3	CSS0023141.1	CSS0023141	CSS0023141	Basic blue protein [Actinidia chinensis var. chinensis]	5-22	2	GO:0046658(anchored component of plasma membrane)
ath-miR408-3p_L-3	CSS0022007.1	CSS0022007	CSS0022007	THO complex subunit 4B like [Actinidia chinensis var. chinensis]	654-671	2.5	GO:0003676(nucleic acid binding);GO:0003729(mRNA binding);GO:0005515(protein binding);GO:0005654(nucleoplasm);GO:0051028(mRNA transport)	ko03040(Spliceosome);ko03013(RNA transport);ko03015(mRNA surveillance pathway)
ath-miR408-3p_L-3	CSS0008741.1	CSS0008741	CSS0008741	IRK-interacting protein [Actinidia chinensis var. chinensis]	216-233	2	GO:0003674(molecular_function);GO:0005774(vacuolar membrane);GO:0008150(biological_process)
ath-miR408-3p_L-3	CSS0025884.1	CSS0025884	CSS0025884	gag-pol, partial [Camellia sinensis]	218-235	2.5	GO:0003723(RNA binding);GO:0003964(RNA-directed DNA polymerase activity);GO:0005737(cytoplasm);GO:0006278(RNA-dependent DNA biosynthetic process);GO:0015074(DNA integration)	ko00040(Pentose and glucuronate interconversions);ko00052(Galactose metabolism);ko00500(Starch and sucrose metabolism);ko00520(Amino sugar and nucleotide sugar metabolism)
ath-miR408-3p_L-3	CSS0047581.1	CSS0047581	CSS0047581	probable eukaryotic translation initiation factor 5-1 [Olea europaea var. sylvestris]	499-516	2.5	GO:0003743(translation initiation factor activity);GO:0005525(GTP binding);GO:0005634(nucleus);GO:0005737(cytoplasm);GO:0006413(translational initiation);GO:0006446(regulation of translational initiation)	ko03013(RNA transport)
ath-miR408-3p_L-3	CSS0035921.1	CSS0035921	CSS0035921	Laccase-12 like [Actinidia chinensis var. chinensis]	188-205	2.5	GO:0005507(copper ion binding);GO:0016722(oxidoreductase activity, oxidizing metal ions)
ath-miR408-3p_L-3	CSS0032409.1	CSS0032409	CSS0032409	Polyadenylate-binding protein [Actinidia chinensis var. chinensis]	1300-1317	2	GO:0005634(nucleus);GO:0008143(poly(A) binding);GO:0010494(cytoplasmic stress granule);GO:0034605(cellular response to heat)	ko03013(RNA transport)
ath-miR408-3p_L-3	CSS0050463.1	CSS0050463	CSS0050463	Chromatin modification-related protein EAF1 A like [Actinidia chinensis var. chinensis]	1431-1448	2.5	-
ath-miR408-3p_L-3	CSS0038897.1	CSS0038897	CSS0038897	Retrovirus-related Pol polyprotein from transposon 17.6 [Vitis vinifera]	2098-2115	2.5	GO:0000719(photoreactive repair);GO:0003904(deoxyribodipyrimidine photo-lyase activity)	ko00511(Other glycan degradation)
ath-miR408-3p_L-3	CSS0043886.1	CSS0043886	CSS0043886	adenine phosphoribosyltransferase [Camellia sinensis]	370-387	2.5	GO:0003999(adenine phosphoribosyltransferase activity);GO:0005737(cytoplasm);GO:0005829(cytosol);GO:0006166(purine ribonucleoside salvage);GO:0006168(adenine salvage);GO:0009116(nucleoside metabolic process);GO:0016021(integral component of membrane);GO:0044209(AMP salvage)	ko00230(Purine metabolism)
ath-miR408-3p_L-3	CSS0039340.1	CSS0039340	CSS0039340	adenine phosphoribosyltransferase [Camellia sinensis]	417-434	2.5	GO:0003999(adenine phosphoribosyltransferase activity);GO:0005737(cytoplasm);GO:0005829(cytosol);GO:0006166(purine ribonucleoside salvage);GO:0006168(adenine salvage);GO:0009116(nucleoside metabolic process);GO:0016021(integral component of membrane);GO:0044209(AMP salvage)	ko00230(Purine metabolism)
ath-miR408-3p_L-3	CSS0047043.1	CSS0047043	CSS0047043	IRK-interacting protein [Actinidia chinensis var. chinensis]	175-192	2	GO:0003674(molecular_function);GO:0005774(vacuolar membrane);GO:0008150(biological_process)
ath-miR408-3p_L-3	CSS0033883.1	CSS0033883	CSS0033883	hypothetical protein EUGRSUZ_E03348 [Eucalyptus grandis]	913-930	2.5	GO:0000495(box H/ACA snoRNA 3'-end processing);GO:0009982(pseudouridine synthase activity);GO:0031118(rRNA pseudouridine synthesis);GO:0031120(snRNA pseudouridine synthesis);GO:0031429(box H/ACA snoRNP complex);GO:1990481(mRNA pseudouridine synthesis)	ko03008(Ribosome biogenesis in eukaryotes)
ath-miR408-3p_L-3	CSS0042919.1	CSS0042919	CSS0042919	NA	257-274	2.5	-
ath-miR408-3p_L-3	CSS0012774.1	CSS0012774	CSS0012774	Protein EARLY FLOWERING like [Actinidia chinensis var. chinensis]	873-890	2.5	GO:0003700(DNA binding transcription factor activity);GO:0005515(protein binding);GO:0005634(nucleus);GO:0006351(transcription, DNA-templated);GO:0006355(regulation of transcription, DNA-templated);GO:0007623(circadian rhythm);GO:0008022(protein C-terminus binding);GO:0009409(response to cold);GO:0009585(red, far-red light phototransduction);GO:0009733(response to auxin);GO:0009737(response to ab…	ko04712(Circadian rhythm - plant)
ath-miR408-3p_L-3	CSS0038032.1	CSS0038032	CSS0038032	Receptor-like serine/threonine-protein kinase [Actinidia chinensis var. chinensis]	1133-1149	2.5	GO:0005524(ATP binding);GO:0005634(nucleus);GO:0016021(integral component of membrane);GO:0016301(kinase activity);GO:0016310(phosphorylation)
ath-miR408-3p_L-3	CSS0015533.1	CSS0015533	CSS0015533	Protein EARLY FLOWERING like [Actinidia chinensis var. chinensis]	775-792	2.5	GO:0003700(DNA binding transcription factor activity);GO:0005515(protein binding);GO:0005634(nucleus);GO:0006351(transcription, DNA-templated);GO:0006355(regulation of transcription, DNA-templated);GO:0007623(circadian rhythm);GO:0008022(protein C-terminus binding);GO:0009409(response to cold);GO:0009585(red, far-red light phototransduction);GO:0009733(response to auxin);GO:0009737(response to ab…	ko04712(Circadian rhythm - plant)
ath-miR408-3p_L-3	CSS0036895.1	CSS0036895	CSS0036895	NA	29-46	2.5	-
ath-miR408-3p_L-3	CSS0025623.1	CSS0025623	CSS0025623	PREDICTED: disease resistance RPP13-like protein 4 [Capsicum annuum]	1720-1737	2.5	GO:0005515(protein binding);GO:0005524(ATP binding);GO:0005634(nucleus);GO:0005886(plasma membrane);GO:0006952(defense response);GO:0007165(signal transduction);GO:0043531(ADP binding);GO:0043621(protein self-association);GO:0050829(defense response to Gram-negative bacterium)	ko04626(Plant-pathogen interaction)
ath-miR408-3p_L-3	CSS0045832.1	CSS0045832	CSS0045832	E3 ubiquitin-protein like [Actinidia chinensis var. chinensis]	404-421	2.5	GO:0005507(copper ion binding);GO:0016722(oxidoreductase activity, oxidizing metal ions)
ath-miR408-3p_L-3	CSS0036411.1	CSS0036411	CSS0036411	RNA polymerase II subunit 5-mediating protein [Actinidia chinensis var. chinensis]	92-109	2	GO:0003682(chromatin binding);GO:0005665(DNA-directed RNA polymerase II, core complex);GO:0010923(negative regulation of phosphatase activity);GO:0019212(phosphatase inhibitor activity)
ath-miR408-3p_L-3	CSS0004312.1	CSS0004312	CSS0004312	THO complex subunit 4B [Populus trichocarpa]	299-316	2.5	GO:0003676(nucleic acid binding);GO:0003729(mRNA binding);GO:0005515(protein binding);GO:0005654(nucleoplasm);GO:0051028(mRNA transport)	ko03040(Spliceosome);ko03013(RNA transport);ko03015(mRNA surveillance pathway)
ath-miR408-3p_L-3	CSS0019918.1	CSS0019918	CSS0019918	PREDICTED: cytochrome P450 CYP72A219-like isoform X2 [Capsicum annuum]	913-930	2.5	GO:0004497(monooxygenase activity)
ath-miR408-3p_L-3	CSS0040637.1	CSS0040637	CSS0040637	cytochrome P450 72A556 [Platycodon grandiflorus]	1147-1164	2.5	GO:0004497(monooxygenase activity)
ath-miR408-3p_L-3	CSS0029110.1	CSS0029110	CSS0029110	DNA-repair protein, UmuC-like protein [Corchorus olitorius]	419-435	2.5	GO:0003684(damaged DNA binding);GO:0003887(DNA-directed DNA polymerase activity);GO:0005515(protein binding);GO:0005634(nucleus);GO:0006260(DNA replication);GO:0006281(DNA repair);GO:0009650(UV protection);GO:0010224(response to UV-B);GO:0042276(error-prone translesion synthesis);GO:0046872(metal ion binding)
ath-miR408-3p_L-3	CSS0037459.1	CSS0037459	CSS0037459	PREDICTED: ERBB-3 BINDING PROTEIN 1 [Vitis vinifera]	421-438	2.5	GO:0001558(regulation of cell growth);GO:0005634(nucleus);GO:0009734(auxin-activated signaling pathway);GO:0044843(cell cycle G1/S phase transition);GO:0051302(regulation of cell division)
ath-miR408-3p_L-3	CSS0029522.1	CSS0029522	CSS0029522	PREDICTED: ERBB-3 BINDING PROTEIN 1 [Vitis vinifera]	466-483	2.5	GO:0001558(regulation of cell growth);GO:0005634(nucleus);GO:0009734(auxin-activated signaling pathway);GO:0044843(cell cycle G1/S phase transition);GO:0051302(regulation of cell division)
ath-miR408-3p_L-3	CSS0037628.1	CSS0037628	CSS0037628	Beta-1,6-galactosyltransferase [Actinidia chinensis var. chinensis]	1249-1266	2.5	GO:0008373(sialyltransferase activity);GO:0008378(galactosyltransferase activity);GO:0009311(oligosaccharide metabolic process);GO:0018279(protein N-linked glycosylation via asparagine);GO:0097503(sialylation)	ko00603(Glycosphingolipid biosynthesis - globo and isoglobo series);ko00604(Glycosphingolipid biosynthesis - ganglio series)
ath-miR408-3p_L-3	CSS0006846.1	CSS0006846	CSS0006846	uncharacterized protein LOC111401429 [Olea europaea var. sylvestris]	1013-1030	2.5	GO:0000786(nucleosome);GO:0003677(DNA binding);GO:0005634(nucleus);GO:0005730(nucleolus);GO:0006334(nucleosome assembly);GO:0009294(DNA mediated transformation);GO:0009507(chloroplast)
ath-miR408-3p_L-3	CSS0007633.1	CSS0007633	CSS0007633	PREDICTED: cytochrome P450 CYP72A219-like [Nicotiana attenuata]	1104-1121	2.5	GO:0004497(monooxygenase activity)
ath-miR408-3p_L-3	CSS0032074.1	CSS0032074	CSS0032074	Thaumatin-like protein [Actinidia chinensis var. chinensis]	1469-1486	2.5	GO:0003674(molecular_function);GO:0005576(extracellular region);GO:0031225(anchored component of membrane);GO:0051707(response to other organism)	ko03440(Homologous recombination)
ath-miR408-3p_L-3	CSS0016619.1	CSS0016619	CSS0016619	Thaumatin-like protein [Actinidia chinensis var. chinensis]	1130-1147	2.5	GO:0003674(molecular_function);GO:0005576(extracellular region);GO:0031225(anchored component of membrane);GO:0051707(response to other organism)	ko03440(Homologous recombination)
ath-miR408-3p_L-3	CSS0044971.1	CSS0044971	CSS0044971	gag-pol, partial [Camellia sinensis]	274-291	2.5	GO:0003723(RNA binding);GO:0003964(RNA-directed DNA polymerase activity);GO:0005737(cytoplasm);GO:0006278(RNA-dependent DNA biosynthetic process);GO:0015074(DNA integration)	ko00511(Other glycan degradation)
ath-miR408-3p_L-3	CSS0010450.1	CSS0010450	CSS0010450	Alpha crystallin/Hsp20 domain-containing protein [Cynara cardunculus var. scolymus]	242-259	2.5	GO:0005509(calcium ion binding);GO:0005544(calcium-dependent phospholipid binding);GO:0005886(plasma membrane)	ko00270(Cysteine and methionine metabolism);ko00450(Selenocompound metabolism)
ath-miR408-3p_L-3	CSS0033946.1	CSS0033946	CSS0033946	Serine-rich adhesin for platelets like [Actinidia chinensis var. chinensis]	2769-2786	2.5	GO:0006368(transcription elongation from RNA polymerase II promoter);GO:0070449(elongin complex)
ath-miR408-3p_L-3	CSS0042925.1	CSS0042925	CSS0042925	ERBB-3 BINDING PROTEIN 1 like [Actinidia chinensis var. chinensis]	85-102	2	GO:0001558(regulation of cell growth);GO:0005634(nucleus);GO:0009734(auxin-activated signaling pathway);GO:0044843(cell cycle G1/S phase transition);GO:0051302(regulation of cell division)
ath-miR408-3p_L-3	CSS0040348.1	CSS0040348	CSS0040348	PREDICTED: transcription factor bHLH118 [Theobroma cacao]	322-339	2.5	GO:0000977(RNA polymerase II regulatory region sequence-specific DNA binding);GO:0003700(DNA binding transcription factor activity);GO:0006357(regulation of transcription by RNA polymerase II);GO:0090575(RNA polymerase II transcription factor complex)
ath-miR408-3p_L-3	CSS0028100.1	CSS0028100	CSS0028100	Structural maintenance of chromosomes protein like [Actinidia chinensis var. chinensis]	1267-1284	2.5	GO:0000775(chromosome, centromeric region);GO:0000785(chromatin);GO:0003682(chromatin binding);GO:0005524(ATP binding);GO:0005634(nucleus);GO:0005737(cytoplasm);GO:0005819(spindle);GO:0006281(DNA repair);GO:0007059(chromosome segregation);GO:0007062(sister chromatid cohesion);GO:0008278(cohesin complex);GO:0009506(plasmodesma);GO:0016363(nuclear matrix);GO:0051301(cell division);GO:0051321(meioti…
ath-miR408-3p_L-3	CSS0012911.1	CSS0012911	CSS0012911	ATP-citrate synthase alpha chain protein [Actinidia chinensis var. chinensis]	1892-1909	2.5	GO:0003878(ATP citrate synthase activity);GO:0005524(ATP binding);GO:0005737(cytoplasm);GO:0005829(cytosol);GO:0006085(acetyl-CoA biosynthetic process);GO:0006633(fatty acid biosynthetic process);GO:0009346(citrate lyase complex)	ko00020(Citrate cycle (TCA cycle))
ath-miR408-3p_L-3	CSS0018544.1	CSS0018544	CSS0018544	uncharacterized protein LOC107433325 isoform X1 [Ziziphus jujuba]	677-694	2.5	GO:0003674(molecular_function);GO:0005634(nucleus);GO:0008150(biological_process)
ath-miR408-3p_L-3	CSS0045193.1	CSS0045193	CSS0045193	hypothetical protein CISIN_1g010687mg [Citrus sinensis]	523-540	2.5	GO:0000038(very long-chain fatty acid metabolic process);GO:0005634(nucleus);GO:0006633(fatty acid biosynthetic process);GO:0016021(integral component of membrane);GO:0042335(cuticle development);GO:0102336(3-oxo-arachidoyl-CoA synthase activity);GO:0102337(3-oxo-cerotoyl-CoA synthase activity);GO:0102338(3-oxo-lignoceronyl-CoA synthase activity);GO:0102756(very-long-chain 3-ketoacyl-CoA synthase…	ko00062(Fatty acid elongation)
ath-miR408-3p_L-3	CSS0046900.1	CSS0046900	CSS0046900	40S ribosomal protein S6 [Phoenix dactylifera]	616-633	2.5	GO:0006364(rRNA processing);GO:0022627(cytosolic small ribosomal subunit);GO:0042274(ribosomal small subunit biogenesis)	ko03010(Ribosome)
ath-miR408-3p_L-3	CSS0040015.1	CSS0040015	CSS0040015	Copper-transporting ATPase [Actinidia chinensis var. chinensis]	2249-2266	2.5	GO:0005887(integral component of plasma membrane);GO:0043231(intracellular membrane-bounded organelle);GO:0043682(copper-transporting ATPase activity)
ath-miR408-3p_L-3	CSS0035356.1	CSS0035356	CSS0035356	basic blue protein [Camellia sinensis]	116-133	1	GO:0046658(anchored component of plasma membrane)
ath-miR408-3p_L-3	CSS0013077.1	CSS0013077	CSS0013077	Chemocyanin like [Actinidia chinensis var. chinensis]	8-25	2	GO:0046658(anchored component of plasma membrane)
ath-miR408-3p_L-3	CSS0001571.1	CSS0001571	CSS0001571	Chemocyanin like [Actinidia chinensis var. chinensis]	8-25	2	GO:0046658(anchored component of plasma membrane)
ath-miR408-3p_L-3	CSS0036152.1	CSS0036152	CSS0036152	basic blue protein [Camellia sinensis]	116-133	1.5	GO:0046658(anchored component of plasma membrane)
ath-miR408-3p_L-3	CSS0002254.1	CSS0002254	CSS0002254	Chemocyanin like [Actinidia chinensis var. chinensis]	8-25	2	GO:0046658(anchored component of plasma membrane)
ath-miR408-3p_L-3	CSS0039195.1	CSS0039195	CSS0039195	Chemocyanin like [Actinidia chinensis var. chinensis]	8-25	2	GO:0046658(anchored component of plasma membrane)
ath-miR408-3p_L-3	CSS0010176.1	CSS0010176	CSS0010176	40S ribosomal protein S6 [Phoenix dactylifera]	640-657	2.5	GO:0006364(rRNA processing);GO:0022627(cytosolic small ribosomal subunit);GO:0042274(ribosomal small subunit biogenesis)	ko03010(Ribosome)
ath-miR408-3p_L-3	CSS0049021.1	CSS0049021	CSS0049021	gag-pol, partial [Camellia sinensis]	1690-1707	2.5	GO:0000719(photoreactive repair);GO:0003904(deoxyribodipyrimidine photo-lyase activity)
ath-miR408-3p_L-3	CSS0018906.1	CSS0018906	CSS0018906	Receptory region, transmembrane domain- and RING domain-containing protein [Actinidia chinensis var. chinensis]	871-888	2.5	GO:0043161(proteasome-mediated ubiquitin-dependent protein catabolic process);GO:0061630(ubiquitin protein ligase activity)
ath-miR408-3p_L-3	CSS0013941.1	CSS0013941	CSS0013941	LRR receptor-like serine/threonine-protein kinase [Actinidia chinensis var. chinensis]	874-891	2.5	GO:0004674(protein serine/threonine kinase activity);GO:0005886(plasma membrane)
ath-miR408-3p_L-3	CSS0026511.1	CSS0026511	CSS0026511	Retrovirus-related Pol polyprotein from transposon 17.6 [Vitis vinifera]	2101-2118	2.5	GO:0000719(photoreactive repair);GO:0003904(deoxyribodipyrimidine photo-lyase activity)
ath-miR408-3p_L-3	CSS0037898.1	CSS0037898	CSS0037898	hypothetical protein CEY00_Acc17070 [Actinidia chinensis var. chinensis]	337-354	2.5	GO:0003674(molecular_function);GO:0005739(mitochondrion);GO:0008150(biological_process)
ath-miR408-3p_L-3	CSS0037081.1	CSS0037081	CSS0037081	Subtilisin-like protease [Actinidia chinensis var. chinensis]	1306-1323	2.5	GO:0004252(serine-type endopeptidase activity);GO:0005618(cell wall)
ath-miR408-3p_L-3	CSS0039321.1	CSS0039321	CSS0039321	Protein BIG GRAIN 1-like [Actinidia chinensis var. chinensis]	142-159	2.5	GO:0003674(molecular_function);GO:0005634(nucleus);GO:0009734(auxin-activated signaling pathway)
ath-miR408-3p_L-3	CSS0000625.1	CSS0000625	CSS0000625	putative ribonuclease H protein [Vitis vinifera]	1075-1092	2.5	-
ath-miR408-3p_L-3	CSS0006734.1	CSS0006734	CSS0006734	hypothetical protein B456_004G069900 [Gossypium raimondii]	578-595	1.5	GO:0046658(anchored component of plasma membrane)
ath-miR408-3p_L-3	CSS0020605.1	CSS0020605	CSS0020605	uclacyanin-3-like [Durio zibethinus]	628-645	2	GO:0046658(anchored component of plasma membrane)
ath-miR408-3p_L-3	CSS0018018.1	CSS0018018	CSS0018018	PREDICTED: THO complex subunit 4A [Nelumbo nucifera]	907-924	2.5	GO:0003676(nucleic acid binding);GO:0003729(mRNA binding);GO:0005515(protein binding);GO:0005654(nucleoplasm);GO:0051028(mRNA transport)	ko03040(Spliceosome);ko03013(RNA transport);ko03015(mRNA surveillance pathway)
ath-miR408-3p_L-3	CSS0044850.1	CSS0044850	CSS0044850	RNA polymerase II subunit 5-mediating protein [Actinidia chinensis var. chinensis]	70-87	2	GO:0003682(chromatin binding);GO:0005665(DNA-directed RNA polymerase II, core complex);GO:0010923(negative regulation of phosphatase activity);GO:0019212(phosphatase inhibitor activity)
ath-miR408-3p_L-3	CSS0027918.1	CSS0027918	CSS0027918	Rho1 guanine nucleotide exchange factor like [Actinidia chinensis var. chinensis]	579-596	1.5	GO:0003674(molecular_function);GO:0005575(cellular_component);GO:0008150(biological_process)	ko00350(Tyrosine metabolism);ko00360(Phenylalanine metabolism);ko00380(Tryptophan metabolism);ko00901(Indole alkaloid biosynthesis);ko00950(Isoquinoline alkaloid biosynthesis);ko00965(Betalain biosynthesis)
ath-miR408-3p_L-3	CSS0013080.1	CSS0013080	CSS0013080	Neutral ceramidase [Actinidia chinensis var. chinensis]	1319-1336	2.5	GO:0005576(extracellular region);GO:0005623(cell);GO:0005774(vacuolar membrane);GO:0005783(endoplasmic reticulum);GO:0017040(N-acylsphingosine amidohydrolase activity);GO:0034599(cellular response to oxidative stress);GO:0090156(cellular sphingolipid homeostasis)	ko00600(Sphingolipid metabolism)
ath-miR408-3p_L-3	CSS0026780.1	CSS0026780	CSS0026780	Neutral ceramidase [Actinidia chinensis var. chinensis]	1565-1582	2.5	GO:0005576(extracellular region);GO:0005623(cell);GO:0005774(vacuolar membrane);GO:0005783(endoplasmic reticulum);GO:0017040(N-acylsphingosine amidohydrolase activity);GO:0034599(cellular response to oxidative stress);GO:0090156(cellular sphingolipid homeostasis)	ko00600(Sphingolipid metabolism)
ath-miR408-3p_L-3	CSS0007318.1	CSS0007318	CSS0007318	NA	226-243	1.5	-
ath-miR408-3p_L-3	CSS0004169.1	CSS0004169	CSS0004169	Basic blue protein [Actinidia chinensis var. chinensis]	17-34	1.5	GO:0046658(anchored component of plasma membrane)
ath-miR408-3p_L-3	CSS0038813.1	CSS0038813	CSS0038813	Blue copper protein [Actinidia chinensis var. chinensis]	580-597	2	GO:0046658(anchored component of plasma membrane)
bna-miR166f_L+2R-2	CSS0009114.1	CSS0009114	CSS0009114	phabulosa [Sarracenia purpurea]	996-1016	2	GO:0003677(DNA binding);GO:0003700(DNA binding transcription factor activity);GO:0005634(nucleus);GO:0006351(transcription, DNA-templated);GO:0006355(regulation of transcription, DNA-templated);GO:0008289(lipid binding);GO:0009855(determination of bilateral symmetry);GO:0009944(polarity specification of adaxial/abaxial axis);GO:0009955(adaxial/abaxial pattern specification);GO:0010014(meristem in…
bna-miR166f_L+2R-2	CSS0004529.1	CSS0004529	CSS0004529	Homeobox-leucine zipper protein like [Actinidia chinensis var. chinensis]	791-811	2	GO:0003677(DNA binding);GO:0003700(DNA binding transcription factor activity);GO:0005634(nucleus);GO:0006351(transcription, DNA-templated);GO:0006355(regulation of transcription, DNA-templated);GO:0008284(positive regulation of cell proliferation);GO:0008289(lipid binding);GO:0009733(response to auxin);GO:0010014(meristem initiation);GO:0010067(procambium histogenesis);GO:0010072(primary shoot ap…
bna-miR166f_L+2R-2	CSS0012269.1	CSS0012269	CSS0012269	Homeobox-leucine zipper protein like [Actinidia chinensis var. chinensis]	712-732	2	GO:0003677(DNA binding);GO:0003700(DNA binding transcription factor activity);GO:0005634(nucleus);GO:0006351(transcription, DNA-templated);GO:0006355(regulation of transcription, DNA-templated);GO:0008289(lipid binding);GO:0009855(determination of bilateral symmetry);GO:0009944(polarity specification of adaxial/abaxial axis);GO:0009956(radial pattern formation);GO:0010014(meristem initiation);GO:…
bna-miR166f_L+2R-2	CSS0024393.1	CSS0024393	CSS0024393	Homeobox-leucine zipper protein like [Actinidia chinensis var. chinensis]	576-596	2	GO:0003677(DNA binding);GO:0003700(DNA binding transcription factor activity);GO:0005634(nucleus);GO:0006351(transcription, DNA-templated);GO:0006355(regulation of transcription, DNA-templated);GO:0008284(positive regulation of cell proliferation);GO:0008289(lipid binding);GO:0009733(response to auxin);GO:0010014(meristem initiation);GO:0010067(procambium histogenesis);GO:0010072(primary shoot ap…
bna-miR166f_L+2R-2	CSS0044392.1	CSS0044392	CSS0044392	Homeobox-leucine zipper protein like [Actinidia chinensis var. chinensis]	1349-1369	2	GO:0003677(DNA binding);GO:0003700(DNA binding transcription factor activity);GO:0005634(nucleus);GO:0006351(transcription, DNA-templated);GO:0006355(regulation of transcription, DNA-templated);GO:0008289(lipid binding);GO:0009855(determination of bilateral symmetry);GO:0009944(polarity specification of adaxial/abaxial axis);GO:0009956(radial pattern formation);GO:0010014(meristem initiation);GO:…
bna-miR166f_L+2R-2	CSS0018397.1	CSS0018397	CSS0018397	Homeobox-leucine zipper protein like [Actinidia chinensis var. chinensis]	1538-1558	2.5	GO:0003677(DNA binding);GO:0003700(DNA binding transcription factor activity);GO:0005634(nucleus);GO:0006351(transcription, DNA-templated);GO:0006355(regulation of transcription, DNA-templated);GO:0008289(lipid binding);GO:0009855(determination of bilateral symmetry);GO:0009965(leaf morphogenesis);GO:0010014(meristem initiation);GO:0010073(meristem maintenance);GO:0010075(regulation of meristem g…
cca-MIR156c-p3_2ss7CT17AC	CSS0039108.1	CSS0039108	CSS0039108	Membrane-associated protein [Actinidia chinensis var. chinensis]	437-454	2.5	GO:0005829(cytosol);GO:0009535(chloroplast thylakoid membrane);GO:0010027(thylakoid membrane organization)
cca-MIR156c-p3_2ss7CT17AC	CSS0008581.1	CSS0008581	CSS0008581	PREDICTED: membrane-associated protein VIPP1, chloroplastic [Nicotiana attenuata]	206-223	2.5	GO:0005829(cytosol);GO:0009535(chloroplast thylakoid membrane);GO:0010027(thylakoid membrane organization)
cca-MIR156c-p3_2ss7CT17AC	CSS0019576.1	CSS0019576	CSS0019576	Syntaxin-43 like [Actinidia chinensis var. chinensis]	1203-1220	2.5	GO:0000149(SNARE binding);GO:0005484(SNAP receptor activity);GO:0006886(intracellular protein transport);GO:0006906(vesicle fusion);GO:0012505(endomembrane system);GO:0016021(integral component of membrane);GO:0031201(SNARE complex);GO:0048278(vesicle docking)	ko04130(SNARE interactions in vesicular transport)
cca-MIR156c-p3_2ss7CT17AC	CSS0003035.1	CSS0003035	CSS0003035	Pyrophosphate--fructose 6-phosphate 1-phosphotransferase subunit alpha like [Actinidia chinensis var. chinensis]	457-474	1.8	GO:0003872(6-phosphofructokinase activity);GO:0005524(ATP binding);GO:0005737(cytoplasm);GO:0005829(cytosol);GO:0009744(response to sucrose);GO:0009749(response to glucose);GO:0009750(response to fructose);GO:0010317(pyrophosphate-dependent phosphofructokinase complex, alpha-subunit complex);GO:0015979(photosynthesis);GO:0046872(metal ion binding);GO:0047334(diphosphate-fructose-6-phosphate 1-pho…	ko00010(Glycolysis / Gluconeogenesis);ko00030(Pentose phosphate pathway);ko00051(Fructose and mannose metabolism)
cca-MIR156c-p3_2ss7CT17AC	CSS0026263.1	CSS0026263	CSS0026263	Histone-lysine N-methyltransferase [Actinidia chinensis var. chinensis]	1539-1556	2.5	GO:0001525(angiogenesis);GO:0001763(morphogenesis of a branching structure);GO:0001843(neural tube closure);GO:0005634(nucleus);GO:0005694(chromosome);GO:0006298(mismatch repair);GO:0006355(regulation of transcription, DNA-templated);GO:0006368(transcription elongation from RNA polymerase II promoter);GO:0010793(regulation of mRNA export from nucleus);GO:0030900(forebrain development);GO:0034728(…	ko00310(Lysine degradation)
cca-MIR156c-p3_2ss7CT17AC	CSS0000187.1	CSS0000187	CSS0000187	Cyclin-A1-1 like [Actinidia chinensis var. chinensis]	150-167	2.5	GO:0005515(protein binding);GO:0005634(nucleus);GO:0005737(cytoplasm);GO:0007049(cell cycle);GO:0016538(cyclin-dependent protein serine/threonine kinase regulator activity);GO:0051301(cell division);GO:0051726(regulation of cell cycle)
cca-MIR156c-p3_2ss7CT17AC	CSS0026107.1	CSS0026107	CSS0026107	Cyclin-A1-1 like [Actinidia chinensis var. chinensis]	108-125	2.5	GO:0005515(protein binding);GO:0005634(nucleus);GO:0005737(cytoplasm);GO:0007049(cell cycle);GO:0016538(cyclin-dependent protein serine/threonine kinase regulator activity);GO:0051301(cell division);GO:0051726(regulation of cell cycle)
cca-MIR156c-p3_2ss7CT17AC	CSS0042722.1	CSS0042722	CSS0042722	Mitochondrial uncoupling protein [Actinidia chinensis var. chinensis]	459-476	2.2	GO:0003735(structural constituent of ribosome);GO:0006412(translation)
cca-MIR156c-p3_2ss7CT17AC	CSS0032322.1	CSS0032322	CSS0032322	hypothetical protein CEY00_Acc02796 [Actinidia chinensis var. chinensis]	121-138	2.5	GO:0003674(molecular_function);GO:0008150(biological_process);GO:0009507(chloroplast)
cca-MIR156c-p3_2ss7CT17AC	CSS0020977.1	CSS0020977	CSS0020977	Cellulose synthase-like protein [Actinidia chinensis var. chinensis]	1026-1043	2.5	GO:0000139(Golgi membrane);GO:0000271(polysaccharide biosynthetic process);GO:0000977(RNA polymerase II regulatory region sequence-specific DNA binding);GO:0005794(Golgi apparatus);GO:0005886(plasma membrane);GO:0009833(plant-type primary cell wall biogenesis);GO:0016021(integral component of membrane);GO:0016740(transferase activity);GO:0016757(transferase activity, transferring glycosyl groups)…
cca-MIR156c-p3_2ss7CT17AC	CSS0034538.1	CSS0034538	CSS0034538	phosphomevalonate kinase [Camellia sinensis]	1344-1361	2.2	GO:0004631(phosphomevalonate kinase activity);GO:0005524(ATP binding);GO:0005737(cytoplasm);GO:0005777(peroxisome);GO:0016126(sterol biosynthetic process);GO:0016310(phosphorylation);GO:0019287(isopentenyl diphosphate biosynthetic process, mevalonate pathway)	ko00900(Terpenoid backbone biosynthesis)
cca-MIR156c-p3_2ss7CT17AC	CSS0027867.1	CSS0027867	CSS0027867	RING-H2 finger protein ATL78-like [Quercus suber]	275-292	2.5	GO:0008270(zinc ion binding);GO:0016021(integral component of membrane);GO:0016567(protein ubiquitination);GO:0046872(metal ion binding)
cca-MIR156c-p3_2ss7CT17AC	CSS0045833.1	CSS0045833	CSS0045833	E3 ubiquitin-protein like [Actinidia chinensis var. chinensis]	336-353	2.5	GO:0005737(cytoplasm);GO:0016021(integral component of membrane);GO:0016567(protein ubiquitination);GO:0016740(transferase activity);GO:0046872(metal ion binding)
cca-MIR156c-p3_2ss7CT17AC	CSS0008917.1	CSS0008917	CSS0008917	Pentatricopeptide repeat-containing protein [Actinidia chinensis var. chinensis]	1625-1642	2.5	GO:0005739(mitochondrion);GO:0008150(biological_process);GO:0043231(intracellular membrane-bounded organelle)	ko00500(Starch and sucrose metabolism)
cca-MIR156c-p3_2ss7CT17AC	CSS0024926.1	CSS0024926	CSS0024926	PREDICTED: acetyl-coenzyme A carboxylase carboxyl transferase subunit alpha, chloroplastic-like [Nicotiana tabacum]	227-244	2	GO:0003989(acetyl-CoA carboxylase activity);GO:0005524(ATP binding);GO:0006633(fatty acid biosynthetic process);GO:0009317(acetyl-CoA carboxylase complex);GO:0009507(chloroplast);GO:0009536(plastid);GO:0009570(chloroplast stroma);GO:0009706(chloroplast inner membrane);GO:0009941(chloroplast envelope);GO:0016020(membrane);GO:2001295(malonyl-CoA biosynthetic process)	ko00620(Pyruvate metabolism);ko00640(Propanoate metabolism);ko00061(Fatty acid biosynthesis)
cca-MIR156c-p3_2ss7CT17AC	CSS0050016.1	CSS0050016	CSS0050016	Receptor-like protein kinase [Actinidia chinensis var. chinensis]	411-428	2.5	GO:0004675(transmembrane receptor protein serine/threonine kinase activity);GO:0005524(ATP binding);GO:0005886(plasma membrane);GO:0006468(protein phosphorylation);GO:0007166(cell surface receptor signaling pathway);GO:0016301(kinase activity);GO:0016310(phosphorylation)
cca-MIR156c-p3_2ss7CT17AC	CSS0045212.1	CSS0045212	CSS0045212	Receptor-like protein kinase [Actinidia chinensis var. chinensis]	411-428	2.5	GO:0004675(transmembrane receptor protein serine/threonine kinase activity);GO:0005524(ATP binding);GO:0005886(plasma membrane);GO:0006468(protein phosphorylation);GO:0007166(cell surface receptor signaling pathway);GO:0016301(kinase activity);GO:0016310(phosphorylation)
cca-MIR156c-p3_2ss7CT17AC	CSS0014845.1	CSS0014845	CSS0014845	PREDICTED: uncharacterized protein LOC104891519 [Beta vulgaris subsp. vulgaris]	3135-3152	2.5	GO:0000139(Golgi membrane);GO:0005794(Golgi apparatus);GO:0006486(protein glycosylation);GO:0008378(galactosyltransferase activity);GO:0016021(integral component of membrane);GO:0016757(transferase activity, transferring glycosyl groups);GO:0016758(transferase activity, transferring hexosyl groups)
cca-MIR156c-p3_2ss7CT17AC	CSS0028832.1	CSS0028832	CSS0028832	PREDICTED: ganglioside-induced differentiation-associated protein 2 [Theobroma cacao]	225-242	2.5	GO:0003674(molecular_function);GO:0005737(cytoplasm);GO:0008150(biological_process)
cca-MIR156c-p3_2ss7CT17AC	CSS0047713.1	CSS0047713	CSS0047713	hypothetical protein DVH24_025616 [Malus domestica]	2097-2114	2.2	-
cca-MIR156c-p3_2ss7CT17AC	CSS0004721.1	CSS0004721	CSS0004721	eukaryotic translation initiation factor 1A [Populus trichocarpa]	110-127	2.5	GO:0003743(translation initiation factor activity);GO:0005634(nucleus);GO:0005829(cytosol);GO:0006413(translational initiation)	ko03013(RNA transport)
cca-MIR156c-p3_2ss7CT17AC	CSS0043764.1	CSS0043764	CSS0043764	Protein NUCLEAR FUSION DEFECTIVE like [Actinidia chinensis var. chinensis]	172-188	2.5	GO:0003674(molecular_function);GO:0005634(nucleus);GO:0016021(integral component of membrane);GO:0080167(response to karrikin)
cca-MIR156c-p3_2ss7CT17AC	CSS0016246.1	CSS0016246	CSS0016246	4-coumarate-CoA ligase [Camellia sinensis]	1130-1146	2.5	GO:0005524(ATP binding);GO:0005634(nucleus);GO:0008152(metabolic process);GO:0009411(response to UV);GO:0009611(response to wounding);GO:0009620(response to fungus);GO:0009698(phenylpropanoid metabolic process);GO:0016207(4-coumarate-CoA ligase activity);GO:0016874(ligase activity)	ko00360(Phenylalanine metabolism);ko00130(Ubiquinone and other terpenoid-quinone biosynthesis);ko00940(Phenylpropanoid biosynthesis)
cca-MIR156c-p3_2ss7CT17AC	CSS0025949.1	CSS0025949	CSS0025949	Monothiol glutaredoxin-S2 like [Actinidia chinensis var. chinensis]	471-488	2.5	GO:0005737(cytoplasm);GO:0008794(arsenate reductase (glutaredoxin) activity);GO:0009055(electron transfer activity);GO:0015035(protein disulfide oxidoreductase activity);GO:0045454(cell redox homeostasis);GO:0046872(metal ion binding);GO:0051537(2 iron, 2 sulfur cluster binding)
cca-MIR156c-p3_2ss7CT17AC	CSS0010138.1	CSS0010138	CSS0010138	Protein STRUBBELIG-RECEPTOR FAMILY 8 like [Actinidia chinensis var. chinensis]	981-998	2	GO:0004672(protein kinase activity);GO:0004675(transmembrane receptor protein serine/threonine kinase activity);GO:0005524(ATP binding);GO:0005576(extracellular region);GO:0005886(plasma membrane);GO:0006468(protein phosphorylation);GO:0007166(cell surface receptor signaling pathway);GO:0016021(integral component of membrane);GO:0016301(kinase activity)
cca-MIR156c-p3_2ss7CT17AC	CSS0043427.1	CSS0043427	CSS0043427	PREDICTED: uncharacterized protein At3g49720 [Vitis vinifera]	10-27	2.5	GO:0000139(Golgi membrane);GO:0003674(molecular_function);GO:0005768(endosome);GO:0005794(Golgi apparatus);GO:0005802(trans-Golgi network);GO:0010394(homogalacturonan metabolic process);GO:0016021(integral component of membrane);GO:0040007(growth);GO:0045488(pectin metabolic process);GO:0045489(pectin biosynthetic process)	ko00500(Starch and sucrose metabolism);ko00460(Cyanoamino acid metabolism);ko00940(Phenylpropanoid biosynthesis)
cca-MIR156c-p3_2ss7CT17AC	CSS0010999.1	CSS0010999	CSS0010999	PREDICTED: uncharacterized protein LOC100267587 isoform X1 [Vitis vinifera]	618-635	2.5	GO:0004222(metalloendopeptidase activity);GO:0005524(ATP binding);GO:0006508(proteolysis);GO:0009507(chloroplast)	ko00270(Cysteine and methionine metabolism);ko00350(Tyrosine metabolism);ko00360(Phenylalanine metabolism);ko00400(Phenylalanine, tyrosine and tryptophan biosynthesis);ko00130(Ubiquinone and other terpenoid-quinone biosynthesis);ko00950(Isoquinoline alkaloid biosynthesis);ko00960(Tropane, piperidine and pyridine alkaloid biosynthesis)
cca-MIR156c-p3_2ss7CT17AC	CSS0000473.1	CSS0000473	CSS0000473	PREDICTED: uncharacterized protein LOC100267587 isoform X1 [Vitis vinifera]	647-664	2.5	GO:0004222(metalloendopeptidase activity);GO:0005524(ATP binding);GO:0006508(proteolysis);GO:0009507(chloroplast)	ko00270(Cysteine and methionine metabolism);ko00350(Tyrosine metabolism);ko00360(Phenylalanine metabolism);ko00400(Phenylalanine, tyrosine and tryptophan biosynthesis);ko00130(Ubiquinone and other terpenoid-quinone biosynthesis);ko00950(Isoquinoline alkaloid biosynthesis);ko00960(Tropane, piperidine and pyridine alkaloid biosynthesis)
cca-MIR156c-p3_2ss7CT17AC	CSS0003235.1	CSS0003235	CSS0003235	hypothetical protein CEY00_Acc28635 [Actinidia chinensis var. chinensis]	3884-3901	2	GO:0003674(molecular_function);GO:0005773(vacuole);GO:0008150(biological_process);GO:0009507(chloroplast)
cca-MIR156c-p3_2ss7CT17AC	CSS0005489.1	CSS0005489	CSS0005489	PREDICTED: protein STRUBBELIG-RECEPTOR FAMILY 8-like [Juglans regia]	934-951	2.5	GO:0004672(protein kinase activity);GO:0004675(transmembrane receptor protein serine/threonine kinase activity);GO:0005524(ATP binding);GO:0005576(extracellular region);GO:0005886(plasma membrane);GO:0006468(protein phosphorylation);GO:0007166(cell surface receptor signaling pathway);GO:0016021(integral component of membrane);GO:0016301(kinase activity)
cca-MIR156c-p3_2ss7CT17AC	CSS0024237.1	CSS0024237	CSS0024237	Methyltransferase [Actinidia chinensis var. chinensis]	168-185	2.5	GO:0003723(RNA binding);GO:0016423(tRNA (guanine) methyltransferase activity);GO:0030488(tRNA methylation)
cca-MIR156c-p3_2ss7CT17AC	CSS0002187.1	CSS0002187	CSS0002187	Methyltransferase [Actinidia chinensis var. chinensis]	4680-4697	2.5	GO:0003723(RNA binding);GO:0016423(tRNA (guanine) methyltransferase activity);GO:0030488(tRNA methylation)
cca-MIR156c-p3_2ss7CT17AC	CSS0046200.1	CSS0046200	CSS0046200	Clathrin interactor EPSIN like [Actinidia chinensis var. chinensis]	1761-1778	2.5	GO:0005515(protein binding);GO:0005543(phospholipid binding);GO:0005634(nucleus);GO:0005774(vacuolar membrane);GO:0005794(Golgi apparatus);GO:0005886(plasma membrane);GO:0015031(protein transport);GO:0030136(clathrin-coated vesicle);GO:0030276(clathrin binding)	ko04144(Endocytosis)
cca-MIR156c-p3_2ss7CT17AC	CSS0032646.1	CSS0032646	CSS0032646	Cellulose synthase-like protein [Actinidia chinensis var. chinensis]	258-275	2.5	GO:0000139(Golgi membrane);GO:0000271(polysaccharide biosynthetic process);GO:0000977(RNA polymerase II regulatory region sequence-specific DNA binding);GO:0005794(Golgi apparatus);GO:0005886(plasma membrane);GO:0009833(plant-type primary cell wall biogenesis);GO:0016021(integral component of membrane);GO:0016740(transferase activity);GO:0016757(transferase activity, transferring glycosyl groups)…
cca-MIR156c-p3_2ss7CT17AC	CSS0033694.1	CSS0033694	CSS0033694	Cellulose synthase-like protein [Actinidia chinensis var. chinensis]	249-266	2.5	GO:0000139(Golgi membrane);GO:0000271(polysaccharide biosynthetic process);GO:0000977(RNA polymerase II regulatory region sequence-specific DNA binding);GO:0005794(Golgi apparatus);GO:0005886(plasma membrane);GO:0009833(plant-type primary cell wall biogenesis);GO:0016021(integral component of membrane);GO:0016740(transferase activity);GO:0016757(transferase activity, transferring glycosyl groups)…
cca-MIR156c-p3_2ss7CT17AC	CSS0041642.1	CSS0041642	CSS0041642	Cellulose synthase-like protein [Actinidia chinensis var. chinensis]	185-202	2.5	GO:0000139(Golgi membrane);GO:0000271(polysaccharide biosynthetic process);GO:0000977(RNA polymerase II regulatory region sequence-specific DNA binding);GO:0005794(Golgi apparatus);GO:0005886(plasma membrane);GO:0009833(plant-type primary cell wall biogenesis);GO:0016021(integral component of membrane);GO:0016740(transferase activity);GO:0016757(transferase activity, transferring glycosyl groups)…
cca-MIR156c-p3_2ss7CT17AC	CSS0037731.1	CSS0037731	CSS0037731	Cellulose synthase-like protein [Actinidia chinensis var. chinensis]	249-266	2.5	GO:0000139(Golgi membrane);GO:0000271(polysaccharide biosynthetic process);GO:0000977(RNA polymerase II regulatory region sequence-specific DNA binding);GO:0005794(Golgi apparatus);GO:0005886(plasma membrane);GO:0009833(plant-type primary cell wall biogenesis);GO:0016021(integral component of membrane);GO:0016740(transferase activity);GO:0016757(transferase activity, transferring glycosyl groups)…
cca-MIR156c-p3_2ss7CT17AC	CSS0032273.1	CSS0032273	CSS0032273	Cellulose synthase-like protein [Actinidia chinensis var. chinensis]	258-275	2.5	GO:0000139(Golgi membrane);GO:0000271(polysaccharide biosynthetic process);GO:0000977(RNA polymerase II regulatory region sequence-specific DNA binding);GO:0005794(Golgi apparatus);GO:0005886(plasma membrane);GO:0009833(plant-type primary cell wall biogenesis);GO:0016021(integral component of membrane);GO:0016740(transferase activity);GO:0016757(transferase activity, transferring glycosyl groups)…
cca-MIR156c-p3_2ss7CT17AC	CSS0048193.1	CSS0048193	CSS0048193	Zinc finger CCCH domain-containing protein [Actinidia chinensis var. chinensis]	104-121	2.5	GO:0003676(nucleic acid binding);GO:0003677(DNA binding);GO:0005634(nucleus);GO:0005829(cytosol);GO:0046872(metal ion binding)
cca-MIR156c-p3_2ss7CT17AC	CSS0001476.1	CSS0001476	CSS0001476	Pectinesterase [Actinidia chinensis var. chinensis]	956-973	2.5	GO:0030599(pectinesterase activity);GO:0046910(pectinesterase inhibitor activity);GO:0071944(cell periphery)	ko00040(Pentose and glucuronate interconversions)
cca-MIR156c-p3_2ss7CT17AC	CSS0039442.1	CSS0039442	CSS0039442	LOW QUALITY PROTEIN: leucine-rich repeat receptor-like tyrosine-protein kinase PXC3 [Ricinus communis]	860-876	2	GO:0004674(protein serine/threonine kinase activity);GO:0004714(transmembrane receptor protein tyrosine kinase activity);GO:0005524(ATP binding);GO:0005886(plasma membrane);GO:0006468(protein phosphorylation);GO:0007169(transmembrane receptor protein tyrosine kinase signaling pathway);GO:0016021(integral component of membrane);GO:0016301(kinase activity)
cca-MIR156c-p3_2ss7CT17AC	CSS0031070.1	CSS0031070	CSS0031070	hypothetical protein CUMW_153860 [Citrus unshiu]	1008-1024	2	GO:0005388(calcium-transporting ATPase activity);GO:0005887(integral component of plasma membrane);GO:0043231(intracellular membrane-bounded organelle)
cca-MIR156c-p3_2ss7CT17AC	CSS0013185.1	CSS0013185	CSS0013185	Pyrophosphate--fructose 6-phosphate 1-phosphotransferase subunit alpha like [Actinidia chinensis var. chinensis]	383-400	1.8	GO:0003872(6-phosphofructokinase activity);GO:0005524(ATP binding);GO:0005737(cytoplasm);GO:0005829(cytosol);GO:0006096(glycolytic process);GO:0010317(pyrophosphate-dependent phosphofructokinase complex, alpha-subunit complex);GO:0015979(photosynthesis);GO:0046872(metal ion binding);GO:0047334(diphosphate-fructose-6-phosphate 1-phosphotransferase activity)	ko00010(Glycolysis / Gluconeogenesis);ko00030(Pentose phosphate pathway);ko00051(Fructose and mannose metabolism)
cca-MIR156c-p3_2ss7CT17AC	CSS0017906.1	CSS0017906	CSS0017906	PREDICTED: protein SHI RELATED SEQUENCE 1-like isoform X1 [Juglans regia]	954-971	2.5	GO:0003677(DNA binding);GO:0003700(DNA binding transcription factor activity);GO:0005634(nucleus);GO:0007275(multicellular organism development);GO:0009734(auxin-activated signaling pathway);GO:0009851(auxin biosynthetic process);GO:0009938(negative regulation of gibberellic acid mediated signaling pathway);GO:0010051(xylem and phloem pattern formation);GO:0010252(auxin homeostasis);GO:0045893(po…
cca-MIR156c-p3_2ss7CT17AC	CSS0037761.1	CSS0037761	CSS0037761	hypothetical protein CEY00_Acc28635 [Actinidia chinensis var. chinensis]	4166-4183	2	GO:0003674(molecular_function);GO:0005773(vacuole);GO:0008150(biological_process);GO:0009507(chloroplast)
cca-MIR156c-p3_2ss7CT17AC	CSS0046572.1	CSS0046572	CSS0046572	signal recognition particle 54 kDa protein 2 [Ricinus communis]	989-1006	2.5	GO:0003729(mRNA binding);GO:0003924(GTPase activity);GO:0005525(GTP binding);GO:0005737(cytoplasm);GO:0005786(signal recognition particle, endoplasmic reticulum targeting);GO:0005829(cytosol);GO:0006614(SRP-dependent cotranslational protein targeting to membrane);GO:0006617(SRP-dependent cotranslational protein targeting to membrane, signal sequence recognition);GO:0008312(7S RNA binding)	ko03060(Protein export)
cca-MIR156c-p3_2ss7CT17AC	CSS0023634.2	CSS0023634	CSS0023634	Transcriptional corepressor like [Actinidia chinensis var. chinensis]	611-628	2.5	GO:0000166(nucleotide binding);GO:0000347(THO complex);GO:0000445(THO complex part of transcription export complex);GO:0003723(RNA binding);GO:0005737(cytoplasm);GO:0006397(mRNA processing);GO:0006406(mRNA export from nucleus);GO:0008380(RNA splicing);GO:0010267(production of ta-siRNAs involved in RNA interference);GO:0031047(gene silencing by RNA);GO:0080008(Cul4-RING E3 ubiquitin ligase complex)	ko03040(Spliceosome);ko04120(Ubiquitin mediated proteolysis)
cca-MIR156c-p3_2ss7CT17AC	CSS0049393.1	CSS0049393	CSS0049393	Transcriptional corepressor like [Actinidia chinensis var. chinensis]	665-682	2.5	GO:0000166(nucleotide binding);GO:0000347(THO complex);GO:0000445(THO complex part of transcription export complex);GO:0003723(RNA binding);GO:0005737(cytoplasm);GO:0006397(mRNA processing);GO:0006406(mRNA export from nucleus);GO:0008380(RNA splicing);GO:0010267(production of ta-siRNAs involved in RNA interference);GO:0031047(gene silencing by RNA);GO:0080008(Cul4-RING E3 ubiquitin ligase complex)	ko03040(Spliceosome);ko04120(Ubiquitin mediated proteolysis)
cca-MIR156c-p3_2ss7CT17AC	CSS0016565.1	CSS0016565	CSS0016565	Pentatricopeptide repeat-containing protein [Actinidia chinensis var. chinensis]	516-533	2	GO:0005739(mitochondrion);GO:0008150(biological_process);GO:0008270(zinc ion binding)
cca-MIR156c-p3_2ss7CT17AC	CSS0012265.2	CSS0012265	CSS0012265	Clathrin interactor EPSIN like [Actinidia chinensis var. chinensis]	1800-1817	2.5	GO:0005515(protein binding);GO:0005543(phospholipid binding);GO:0005634(nucleus);GO:0005774(vacuolar membrane);GO:0005794(Golgi apparatus);GO:0005886(plasma membrane);GO:0015031(protein transport);GO:0030136(clathrin-coated vesicle);GO:0030276(clathrin binding)	ko04144(Endocytosis)
cca-MIR156c-p5_2ss7CT17AC	CSS0039108.1	CSS0039108	CSS0039108	Membrane-associated protein [Actinidia chinensis var. chinensis]	437-454	2.5	GO:0005829(cytosol);GO:0009535(chloroplast thylakoid membrane);GO:0010027(thylakoid membrane organization)
cca-MIR156c-p5_2ss7CT17AC	CSS0008581.1	CSS0008581	CSS0008581	PREDICTED: membrane-associated protein VIPP1, chloroplastic [Nicotiana attenuata]	206-223	2.5	GO:0005829(cytosol);GO:0009535(chloroplast thylakoid membrane);GO:0010027(thylakoid membrane organization)
cca-MIR156c-p5_2ss7CT17AC	CSS0019576.1	CSS0019576	CSS0019576	Syntaxin-43 like [Actinidia chinensis var. chinensis]	1203-1220	2.5	GO:0000149(SNARE binding);GO:0005484(SNAP receptor activity);GO:0006886(intracellular protein transport);GO:0006906(vesicle fusion);GO:0012505(endomembrane system);GO:0016021(integral component of membrane);GO:0031201(SNARE complex);GO:0048278(vesicle docking)	ko04130(SNARE interactions in vesicular transport)
cca-MIR156c-p5_2ss7CT17AC	CSS0026263.1	CSS0026263	CSS0026263	Histone-lysine N-methyltransferase [Actinidia chinensis var. chinensis]	1539-1556	2.5	GO:0001525(angiogenesis);GO:0001763(morphogenesis of a branching structure);GO:0001843(neural tube closure);GO:0005634(nucleus);GO:0005694(chromosome);GO:0006298(mismatch repair);GO:0006355(regulation of transcription, DNA-templated);GO:0006368(transcription elongation from RNA polymerase II promoter);GO:0010793(regulation of mRNA export from nucleus);GO:0030900(forebrain development);GO:0034728(…	ko00310(Lysine degradation)
cca-MIR156c-p5_2ss7CT17AC	CSS0003035.1	CSS0003035	CSS0003035	Pyrophosphate--fructose 6-phosphate 1-phosphotransferase subunit alpha like [Actinidia chinensis var. chinensis]	457-474	1.8	GO:0003872(6-phosphofructokinase activity);GO:0005524(ATP binding);GO:0005737(cytoplasm);GO:0005829(cytosol);GO:0009744(response to sucrose);GO:0009749(response to glucose);GO:0009750(response to fructose);GO:0010317(pyrophosphate-dependent phosphofructokinase complex, alpha-subunit complex);GO:0015979(photosynthesis);GO:0046872(metal ion binding);GO:0047334(diphosphate-fructose-6-phosphate 1-pho…	ko00010(Glycolysis / Gluconeogenesis);ko00030(Pentose phosphate pathway);ko00051(Fructose and mannose metabolism)
cca-MIR156c-p5_2ss7CT17AC	CSS0000187.1	CSS0000187	CSS0000187	Cyclin-A1-1 like [Actinidia chinensis var. chinensis]	150-167	2.5	GO:0005515(protein binding);GO:0005634(nucleus);GO:0005737(cytoplasm);GO:0007049(cell cycle);GO:0016538(cyclin-dependent protein serine/threonine kinase regulator activity);GO:0051301(cell division);GO:0051726(regulation of cell cycle)
cca-MIR156c-p5_2ss7CT17AC	CSS0026107.1	CSS0026107	CSS0026107	Cyclin-A1-1 like [Actinidia chinensis var. chinensis]	108-125	2.5	GO:0005515(protein binding);GO:0005634(nucleus);GO:0005737(cytoplasm);GO:0007049(cell cycle);GO:0016538(cyclin-dependent protein serine/threonine kinase regulator activity);GO:0051301(cell division);GO:0051726(regulation of cell cycle)
cca-MIR156c-p5_2ss7CT17AC	CSS0032322.1	CSS0032322	CSS0032322	hypothetical protein CEY00_Acc02796 [Actinidia chinensis var. chinensis]	121-138	2.5	GO:0003674(molecular_function);GO:0008150(biological_process);GO:0009507(chloroplast)
cca-MIR156c-p5_2ss7CT17AC	CSS0042722.1	CSS0042722	CSS0042722	Mitochondrial uncoupling protein [Actinidia chinensis var. chinensis]	459-476	2.2	GO:0003735(structural constituent of ribosome);GO:0006412(translation)
cca-MIR156c-p5_2ss7CT17AC	CSS0027867.1	CSS0027867	CSS0027867	RING-H2 finger protein ATL78-like [Quercus suber]	275-292	2.5	GO:0008270(zinc ion binding);GO:0016021(integral component of membrane);GO:0016567(protein ubiquitination);GO:0046872(metal ion binding)
cca-MIR156c-p5_2ss7CT17AC	CSS0008917.1	CSS0008917	CSS0008917	Pentatricopeptide repeat-containing protein [Actinidia chinensis var. chinensis]	1625-1642	2.5	GO:0005739(mitochondrion);GO:0008150(biological_process);GO:0043231(intracellular membrane-bounded organelle)	ko00500(Starch and sucrose metabolism)
[truncated: 294 more rows]

## Sheet: KEGG-enrichment_miRNA_Gene
miRNA	KEGG ID	Transcript ID	Gene ID	Symbol	Gene Annoation		KEGG Name	Pvalue of Fisher's Exact Test
[truncated: 710 more rows]

[truncated: 1 more sheets: GO_enrichment-miRNA_Gene]
